# Supplementary material for: How can the healthcare system deliver sustainable performance? A scoping review
Source: PubMed Central journal article supplement — BMJ Open. 2022 May 19;12(5):e059207. doi: 10.1136/bmjopen-2021-059207 (PMC9125771; doi:10.1136/bmjopen-2021-059207), 2022-05-19
Supplement: bmjopen-2021-059207.draft_revisions.pdf [file bmjopen-2021-059207.draft_revisions.pdf]

# BMJ Open

BMJ Open is committed to open peer review. As part of this commitment we make the peer review history of every article we publish publicly available.

When an article is published we post the peer reviewers' comments and the authors' responses online. We also post the versions of the paper that were used during peer review. These are the versions that the peer review comments apply to.

The versions of the paper that follow are the versions that were submitted during the peer review process. They are not the versions of record or the final published versions. They should not be cited or distributed as the published version of this manuscript.

BMJ Open is an open access journal and the full, final, typeset and author-corrected version of record of the manuscript is available on our site with no access controls, subscription charges or pay-per-view fees (<http://bmjopen.bmj.com>).

If you have any questions on BMJ Open's open peer review process please email [info.bmjopen@bmj.com](mailto:info.bmjopen@bmj.com)

# BMJ Open

## How can the Healthcare System Deliver Sustainable Performance? A Scoping Review

|                               |                                                                                                                                                                                                                                                                                                                                                                                                                                                                                                                                                                                                                                                                                                                                                                                             |
|-------------------------------|---------------------------------------------------------------------------------------------------------------------------------------------------------------------------------------------------------------------------------------------------------------------------------------------------------------------------------------------------------------------------------------------------------------------------------------------------------------------------------------------------------------------------------------------------------------------------------------------------------------------------------------------------------------------------------------------------------------------------------------------------------------------------------------------|
| Journal:                      | <i>BMJ Open</i>                                                                                                                                                                                                                                                                                                                                                                                                                                                                                                                                                                                                                                                                                                                                                                             |
| Manuscript ID                 | bmjopen-2021-059207                                                                                                                                                                                                                                                                                                                                                                                                                                                                                                                                                                                                                                                                                                                                                                         |
| Article Type:                 | Original research                                                                                                                                                                                                                                                                                                                                                                                                                                                                                                                                                                                                                                                                                                                                                                           |
| Date Submitted by the Author: | 16-Nov-2021                                                                                                                                                                                                                                                                                                                                                                                                                                                                                                                                                                                                                                                                                                                                                                                 |
| Complete List of Authors:     | Zurynski, Yvonne; Macquarie University, Australian Institute of Health Innovation<br>Herkes, Jessica; Macquarie University, Australian Institute of Health Innovation<br>Holt, Joanna; Macquarie University, Australian Institute of Health Innovation<br>McPherson, Elise; Macquarie University, Australian Institute of Health Innovation<br>Lamprell, Gina; Macquarie University, Australian Institute of Health Innovation<br>Dammery, Genevieve; Macquarie University, Australian Institute of Health Innovation<br>Meulenbroeks, Isabelle; Macquarie University, Australian Institute of Health Innovation<br>Halim, Nicole; Macquarie University, Australian Institute of Health Innovation<br>Braithwaite, Jeffrey; Macquarie University, Australian Institute of Health Innovation |
| Keywords:                     | PUBLIC HEALTH, QUALITATIVE RESEARCH, Health policy < HEALTH SERVICES ADMINISTRATION & MANAGEMENT                                                                                                                                                                                                                                                                                                                                                                                                                                                                                                                                                                                                                                                                                            |
|                               |                                                                                                                                                                                                                                                                                                                                                                                                                                                                                                                                                                                                                                                                                                                                                                                             |

SCHOLARONE™  
Manuscripts

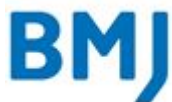

I, the Submitting Author has the right to grant and does grant on behalf of all authors of the Work (as defined in the below author licence), an exclusive licence and/or a non-exclusive licence for contributions from authors who are: i) UK Crown employees; ii) where BMJ has agreed a CC-BY licence shall apply, and/or iii) in accordance with the terms applicable for US Federal Government officers or employees acting as part of their official duties; on a worldwide, perpetual, irrevocable, royalty-free basis to BMJ Publishing Group Ltd ("BMJ") its licensees and where the relevant Journal is co-owned by BMJ to the co-owners of the Journal, to publish the Work in this journal and any other BMJ products and to exploit all rights, as set out in our [licence](#).

The Submitting Author accepts and understands that any supply made under these terms is made by BMJ to the Submitting Author unless you are acting as an employee on behalf of your employer or a postgraduate student of an affiliated institution which is paying any applicable article publishing charge ("APC") for Open Access articles. Where the Submitting Author wishes to make the Work available on an Open Access basis (and intends to pay the relevant APC), the terms of reuse of such Open Access shall be governed by a Creative Commons licence – details of these licences and which [Creative Commons](#) licence will apply to this Work are set out in our licence referred to above.

Other than as permitted in any relevant BMJ Author's Self Archiving Policies, I confirm this Work has not been accepted for publication elsewhere, is not being considered for publication elsewhere and does not duplicate material already published. I confirm all authors consent to publication of this Work and authorise the granting of this licence.

1  
2  
3 HOW CAN THE HEALTHCARE SYSTEM DELIVER SUSTAINABLE PERFORMANCE? A  
4  
5 SCOPING REVIEW  
6

7 Yvonne Zurynski, Jessica Herkes-Deane, Joanna Holt, Elise McPherson, Gina Lamprell,  
8  
9 Genevieve Dammary, Isabelle Meulenbroeks, Nicole Halim, Jeffrey Braithwaite  
10  
11  
12  
13

14 \*Yvonne Zurynski and \*Jessica Herkes-Deane are joint first authors  
15  
16

17  
18  
19 \*Yvonne Zurynski, PhD, BAppSc, MAppSc, MHPol  
20

21 Centre for Healthcare Resilience and Implementation Science and the NHMRC Partnership  
22

23 Centre for Health System Sustainability, Australian Institute of Health Innovation  
24

25  
26 Macquarie University  
27

28 Sydney, NSW, Australia  
29  
30  
31  
32

33 \*Jessica Herkes-Deane BSc(Adv), MRes  
34

35 Centre for Healthcare Resilience and Implementation Science and the NHMRC Partnership  
36

37 Centre for Health System Sustainability, Australian Institute of Health Innovation  
38

39  
40 Macquarie University  
41

42 Sydney, NSW, Australia  
43  
44  
45  
46

47 Joanna Holt BSc(Hons); MHP  
48

49 Centre for Healthcare Resilience and Implementation Science and the NHMRC Partnership Centre  
50

51 for Health System Sustainability, Australian Institute of Health Innovation  
52

53  
54 Macquarie University  
55

56 Sydney, NSW, Australia  
57  
58  
59  
60

1  
2  
3  
4  
5 Elise McPherson BA, BSc(Hon), MRes

6  
7 Centre for Healthcare Resilience and Implementation Science, Australian Institute of Health

8  
9  
10 Innovation,

11  
12 Macquarie University

13  
14 Sydney, NSW, Australia

15  
16  
17  
18  
19 Gina Lamprell BA(Hons)

20  
21 Centre for Healthcare Resilience and Implementation Science, Australian Institute of Health

22  
23 Innovation

24  
25  
26 Macquarie University

27  
28 Sydney, NSW, Australia

29  
30  
31  
32  
33 Genevieve Dammery BSc(Hons)

34  
35 NHMRC Partnership Centre for Health System Sustainability, Australian Institute of Health

36  
37 Innovation

38  
39  
40 Macquarie University

41  
42 Sydney, NSW, Australia

43  
44  
45  
46  
47 Isabelle Meulenbroeks B. Physio, MPH

48  
49 NHMRC Partnership Centre for Health System Sustainability, Australian Institute of Health

50  
51 Innovation

52  
53  
54 Macquarie University

55  
56 Sydney, NSW, Australia

1  
2  
3  
4  
5 Nicole Halim BSc, MPH  
6

7 Centre for Healthcare Resilience and Implementation Science and the NHMRC Partnership

8  
9 Centre for Health System Sustainability, Australian Institute of Health Innovation

10  
11 Macquarie University

12  
13 Sydney, NSW, Australia  
14  
15  
16  
17

18  
19 Jeffrey Braithwaite PhD, FIML, FCHSM, FFPHRCP, FAcSS, Hon FRACMA, FAHMS

20  
21 Centre for Healthcare Resilience and Implementation Science and the NHMRC Partnership

22  
23 Centre for Health System Sustainability, Australian Institute of Health Innovation

24  
25 Macquarie University

26  
27 Sydney, NSW, Australia  
28  
29  
30  
31

32  
33 **Corresponding author:**

34  
35 Jeffrey Braithwaite

36  
37 Australian Institute of Health Innovation

38  
39 Macquarie University

40  
41 Level 6, 75 Talavera Road

42  
43 North Ryde, NSW 2109,

44  
45 Australia  
46  
47

48  
49 [jeffrey.braithwaite@mq.edu.au](mailto:jeffrey.braithwaite@mq.edu.au)

50  
51 Phone: + 61 2 9850 2401

52  
53 Words Abstract: 295

54  
55 Words Manuscript: 3858  
56  
57

1  
2  
3  
4  
5 HOW CAN THE HEALTHCARE SYSTEM DELIVER SUSTAINABLE PERFORMANCE? A  
6  
7  
8 SCOPING REVIEW  
9  
10  
11

12 **Abstract**

13  
14 **Background:** Increasing health costs, demand and patient multi-morbidity challenge the  
15 sustainability of healthcare systems. These challenges persist and have been amplified by the  
16 global pandemic. We aimed to develop an understanding of how the sustainable performance of  
17 healthcare systems (SPHS) has been conceptualised, defined, and measured.  
18  
19

20  
21 **Methods:** We conducted a scoping review, of peer reviewed articles and editorials published  
22 from database inception to February 2021. We included articles that discussed key focus concepts  
23 of SPHS: 1) definitions, 2) measurement, 3) identified challenges, 4) identified solutions for  
24 improvement, and 5) scaling up successful solutions to maintain SPHS. After screening  
25 procedures, full-text articles were reviewed, and relevant information extracted and synthesised  
26 according to the five focus concepts.  
27  
28

29  
30 **Results:** Of 142 included articles, 38 (27%) provided a definition of SPHS. Definitions were  
31 based mainly on financial sustainability, however, SPHS was more broadly conceptualised and  
32 included acceptability to patients and workforce, resilience through adaptation and rapid  
33 absorption of evidence and innovations. Measures of SPHS were also predominantly financial,  
34 but recent articles proposed more nuanced measures that accounted for financial, social and  
35 health outcome outputs. Challenges to achieving SPHS included the increasingly complex patient  
36 populations, limited integration because of entrenched fragmented systems and siloed  
37 professional groups, and the ongoing translational gaps in evidence-to-practice and policy-to-  
38 practice. Reported strategies to improve and sustain SPHS included developing appropriate  
39  
40  
41  
42  
43  
44  
45  
46  
47  
48  
49  
50  
51  
52  
53  
54  
55  
56  
57

1  
2  
3 organisational and workplace cultures, direct community and consumer involvement, and  
4  
5 adoption of evidence-based practice and technologies. There was also a strong identified need for  
6  
7 long term monitoring and evaluations to support adaptation of healthcare systems and to  
8  
9 anticipate changing needs where possible.  
10

11  
12 **Conclusions:** To implement lasting change and to respond to new challenges, we need clear  
13  
14 definitions and frameworks, and robust, flexible, and feasible measures to support the long term  
15  
16 sustainability and performance of health systems.  
17  
18

19  
20  
21 **Keywords:** healthcare system sustainability, sustainable performance of healthcare systems,  
22  
23 healthcare services, value in healthcare  
24  
25

### 26 27 28 29 30 31 *Strengths and limitations of this study*

- 32  
33 • This scoping review addresses a knowledge gap by providing a comprehensive synthesis  
34  
35 of the literature including definitions, measurement, challenges, solutions for  
36  
37 improvement, and scaling up successful solutions to maintain sustainable performance of  
38  
39 health systems (SPHS).  
40
- 41  
42 • We were guided by the PRISMA-ScR methodology, searching multiple databases and  
43  
44 using complementary snowballing techniques to increase comprehensiveness.  
45  
46
- 47  
48 • The use of the Hawker and AACODS quality appraisal tools provided an assessment of  
49  
50 the quality of literature on the sustainable performance of healthcare systems.  
51
- 52  
53 • We highlight a paucity of uniform definitions and the lack of inclusion of definitions in  
54  
55 articles discussing SPHS, which limits interpretation and comparability.  
56  
57



1  
2  
3  
4  
5  
6  
7  
8  
9  
10  
11  
12  
13  
14  
15  
16  
17  
18  
19  
20  
21  
22  
23  
24  
25  
26  
27  
28  
29  
30  
31  
32  
33  
34  
35  
36  
37  
38  
39  
40  
41  
42  
43  
44  
45  
46  
47  
48  
49  
50  
51  
52  
53  
54  
55  
56  
57  
58  
59  
60

- The review identifies new, more nuanced measures and indicators that include social and health outcomes, moving beyond the more traditionally-used financial outcomes that have dominated the assessment of SPHS.

For peer review only

## Background

Globally, health spending is tracking above and beyond economic growth [2]. Core challenges facing healthcare systems include an ageing population and subsequent rise of chronic diseases and multimorbidity [3, 4], and increasingly expensive new medical technologies [4, 5]. It is estimated that approximately 30% of care delivered by healthcare systems is low-value, attributable mainly to administrative overheads, bureaucracy, over-diagnosis, overtreatment or other factors [6]. Systems lacking coordination and integration across clinical disciplines and health sectors also result in wasteful spending through both care duplication and omission of needed care [7]. If health spending follows current trajectories, governments are suggesting that healthcare systems will begin to become unaffordable [4]. This leads us to the question: “what is the current thinking about interventions and initiatives to make healthcare systems more sustainable?” Understanding how health system sustainability is conceptualised underpins the implementation and evaluation of system-wide interventions that aim to improve performance. Although literature about the sustainability of individual innovations and improvement programs is growing [8], the broad question of whole-of-system sustainability is rarely studied.

Sustainability itself has remained an ambiguous topic in the literature. Sustainability suggests that healthcare systems should be built to last, and able to adapt and endure, ensuring that resources are expended efficiently and responsibly to maintain or improve individual and population health and wellbeing [9]. To be sustainable, a healthcare system must adequately deliver across financial, social, and environmental concerns [5]. This triple bottom-line is difficult to achieve consistently over time. For example, sustainable health services may need additional short-term investments to be financially beneficial in the long-term [2].

1  
2  
3  
4  
5 We define the health system as one that delivers care to those who need it across many different  
6 settings. It includes key components: capacity, including physical, capital, and human assets;  
7 organisational structure, both formal and informal; finances, including mechanisms for funding  
8 allocations, ownership, and solvency; patients or clients and their characteristics and needs; and  
9 care processes and infrastructure [10].  
10  
11  
12  
13  
14  
15  
16  
17  
18

19 Healthcare system sustainability is difficult to measure in practice and requires ongoing long-  
20 term monitoring and evaluation of appropriate indicators. One potential way to conceptualise and  
21 operationalise sustainability is an assessment of the sustainable performance of healthcare  
22 systems (SPHS). Although past reviews have addressed the sustainability of improvement  
23 programs and policies in the healthcare system [8, 11, 12], they did not specifically address how  
24 SPHS is conceptualised in the medical literature. As a response, the current study was designed  
25 using a systems science lens to fill this gap in knowledge by reviewing publications that report on  
26 or discuss healthcare system sustainability.  
27  
28  
29  
30  
31  
32  
33  
34  
35  
36  
37  
38  
39

## 40 **Objectives**

41  
42 This scoping review of health and medical literature aims to develop an understanding of how  
43 SPHS has been conceptualised, defined, and measured, and to scope the identified challenges and  
44 potential solutions to achieving and maintaining SPHS.  
45  
46  
47  
48  
49  
50

## 51 **Methods**

### 52 ***Study Design***

53  
54  
55  
56  
57

1  
2  
3 In keeping with scoping review methodology [13], our inclusion criteria were broad and  
4  
5 comprehensive to capture the state of knowledge about SPHS. We included literature reviews,  
6  
7 primary empirical articles (including qualitative, quantitative, and mixed methods studies), case  
8  
9 studies, opinion pieces, and editorials published in English before February 2021. To be included,  
10  
11 studies had to report on, or discuss in detail, aspects of healthcare systems sustainability,  
12  
13 resilience, or performance improvement, and could cover improvements in cost-effectiveness,  
14  
15 affordability, safety, quality, equity, or access, whilst creating or realising value (Table 1). Only  
16  
17 articles that addressed the research objectives and provided insights into current knowledge of  
18  
19 sustainability in healthcare delivery systems were included. Articles on environmental  
20  
21 sustainability; those investigating discrete improvement programs implemented in specific health  
22  
23 settings; and studies with a specific focus on COVID-19 were out of scope (Table 1).  
24  
25  
26  
27  
28  
29

### 30 ***Information Sources***

31  
32  
33 In consultation with an experienced university medical librarian, we developed a search strategy  
34  
35 using key words and MeSH terms and conducted an advanced search of PubMed and Ovid  
36  
37 Medline (Additional File 1). Additional relevant articles were identified by hand searching  
38  
39 reference lists of included articles (snowballing).  
40  
41  
42  
43

### 44 ***Study Selection***

45  
46  
47 Guided by the Preferred Reporting Items for Systematic review and Meta-Analysis extension for  
48  
49 Scoping Reviews (PRISMA-ScR) statement [14, 15], and the methodological framework for  
50  
51 scoping reviews [13] (Additional File 3), a preliminary screening of the article titles and abstracts  
52  
53 was conducted by four reviewers (JHo, JHe, GD and EM) using the inclusion and exclusion  
54  
55 criteria (Table 1, Additional File 4). The full-text review was then conducted by a second  
56  
57  
58  
59  
60

1  
2  
3 reviewer team (JHe, YZ, GD, IM and GL) in consultation with the first reviewer team (JHo and  
4  
5 EM).  
6  
7  
8  
9

### 10 ***Quality Assessment of Individual Studies***

11  
12 Hawker et al.'s Quality Assessment Tool was applied as it enables quality assessment among  
13  
14 many different article types including quantitative, qualitative, or mixed-methods empirical  
15  
16 research studies or literature reviews [16]. The Quality Assessment Tool contains nine categories  
17  
18 (abstract and title; introduction and aims; method and data; sampling; data analysis; ethics and  
19  
20 bias; results; transferability or generalizability; and implications and usefulness) and a total  
21  
22 quality score can be calculated with a maximum score of 36, where higher scores denote higher  
23  
24 quality [16]. Only articles that scored 24 points or above were included in our review [17, 18].  
25  
26 For quality assessment of opinion or commentary pieces, we used the Authority Accuracy  
27  
28 Coverage Objectivity Date Significance (AACODS) Checklist [13, 18].  
29  
30  
31  
32  
33  
34

### 35 ***Data Extraction***

36  
37 Characteristics of included articles, year of publication, country of origin, and article type were  
38  
39 tabulated. A purpose-designed Excel spreadsheet was used to extract relevant details from each  
40  
41 article including SPHS definitions, measures and measurement frameworks, challenges,  
42  
43 solutions, and factors that contribute to sustainment and scaling of system change. The Excel  
44  
45 spreadsheet was piloted by three reviewers on a subset of five articles and adjusted as needed.  
46  
47  
48  
49  
50

### 51 ***Patient and Public Involvement***

52  
53  
54 No patients involved.  
55  
56  
57

## Results

### *Study Selection*

Of 5675 articles identified in the database searches, 2404 were duplicates, leaving 3271 articles. Undertaking independent title and abstract screening of 5% of articles, two reviewers achieved an acceptable level of agreement (Kappa score = 0.6)[19] A further 2750 articles were excluded, leaving 521 articles for full-text review. A substantial level of agreement was achieved on review of 5% of full text articles undertaken independently by four reviewers JHe, YZ, GD and IM; (Kappa = 0.7)[19]. After full text review, 136 were included. Eighty-three additional articles were identified from snowballing, and six of these met the inclusion criteria, for a total of 142 articles included for data extraction (Figure 1). Additional File 1 provides a table detailing the search and a summary of the included articles.

**Figure 1.** PRISMA flow diagram summarising the review and reasons for article exclusion\*

\*Full text articles and snowballed articles excluded for the following reasons. Note that some articles were excluded for multiple reasons.

**Table 1.** Reasons for article exclusion

| <b>Reason</b>                                                                                                                                      | <b>Exclusion at abstract screening</b> | <b>Exclusion at full text review</b> |
|----------------------------------------------------------------------------------------------------------------------------------------------------|----------------------------------------|--------------------------------------|
| Disaster or emergency                                                                                                                              | 199                                    | 3                                    |
| Foreign aid, equity, or community healthcare                                                                                                       | 598                                    | 20                                   |
| Occupational health and safety                                                                                                                     | 69                                     | 2                                    |
| Environmental sustainability                                                                                                                       | 89                                     | 5                                    |
| Not relevant to Australia e.g. low-resource setting                                                                                                | 730                                    | 82                                   |
| Not about systems e.g., single disease or program                                                                                                  | 1291                                   | 109                                  |
| Preventative e.g., regarding vaccination or nutrition                                                                                              | 277                                    | 18                                   |
| Not relating to healthcare delivery e.g., regarding animal care or food safety                                                                     | 46                                     | 0                                    |
| Regarding physiology/pharmacology                                                                                                                  | 44                                     | 0                                    |
| Does not in another way define, measure, identify challenges, opportunities for improvement or scale up of sustainability in the healthcare system | 398                                    | 166                                  |
| Other e.g., article not written in English, full text not available                                                                                | 4                                      | 95                                   |
| Totals                                                                                                                                             | 3745                                   | 500                                  |

### ***Study Characteristics***

Of the included articles, 18 were review articles (either systematic or narrative), 82 were editorial or opinion pieces, 37 were primary empirical studies, and five were a combination of a brief narrative review and an empirical study (classified as empirical for simplicity). Empirical studies used a wide variety of data collection techniques and included qualitative analysis of interviews,[20] survey results,[21, 22] analysis of hospital data records,[23, 24] and economic analysis [25-29]. The included articles described studies that covered various geographic

1  
2  
3 locations, most commonly Canada (n=22), the United States of America (n=22), Australia (n=23,  
4 including two which involved Australia and New Zealand), the United Kingdom (n=6), the  
5 European Union as a whole rather than individual countries (n=8), the Netherlands (n=2) and one  
6 each from Austria, Italy, Northern Ireland, Malaysia, Malta, New Zealand, Nordic countries,  
7 Oman, the Philippines, Portugal, Scotland, Spain, and the Western Pacific Region. Forty-two  
8 studies discussed healthcare system sustainability on an international scale, one included the  
9 United States of America, the United Kingdom, and Australia [30] and another included  
10 Australia, Ireland, Austria and Denmark [31].  
11  
12  
13  
14  
15  
16  
17  
18  
19  
20  
21  
22  
23

24 The data extraction sheet included the citation, study aims, study design, themes addressed, and  
25 additional relevant information about SPHS, (Additional File 1). Of the 142 articles, most  
26 identified challenges (n=94, 66%) and proposed ways to improve SPHS (n=89, 62%) while fewer  
27 discussed measuring SPHS (n=48, 34%), or sustaining and scaling change (n=47, 33%) and  
28 fewer still provided any definition of SPHS (n=38, 27%).  
29  
30  
31  
32  
33  
34  
35  
36  
37

### 38 ***Bias and Quality in Included Studies***

39  
40 Forty-three empirical studies scored 25-34 points on the Hawker's Quality Assessment Tool,[16];  
41 29 of high quality, 13 moderate quality, and one borderline low quality [17]. None of the  
42 empirical articles were excluded due to potential bias or low quality (Additional File 2). The  
43 quality of editorial and opinion pieces (n = 99) was analysed according to the AACODS criteria,  
44 and 72 articles ranked 'yes' for all criteria indicating high quality, (Additional File 2).  
45  
46  
47  
48  
49  
50  
51  
52  
53

## 54 **Synthesis of Results and Discussion**

### 55 ***Defining SPHS***



1  
2  
3 Definitions of SPHS were provided by 25 editorial or opinion pieces, seven review articles, and  
4  
5 six empirical studies (Table 2). The definitions fell into three broad groupings: 1) fiscal  
6  
7 sustainability, 2) human resource sustainability and acceptance of change by stakeholders, and 3)  
8  
9 system adaptability and improvement over time (Table 2). Definitions focused on the importance  
10  
11 of continual improvement [30], and acceptance and embeddedness of changes into the fabric of  
12  
13 the healthcare system via ongoing approval from stakeholders [32-34]. Generally, definitions  
14  
15 were aligned with the authors' aims or concerns, e.g., Rees [30], who tackled sustainability in  
16  
17 relation to Lean activities, and Buchan [35] who argued for the importance of human resource  
18  
19 development to support SPHS.  
20  
21  
22  
23  
24  
25

26 Articles defining SPHS in terms of fiscal sustainability [25, 33, 34, 36-39] included, for example,  
27  
28 discussions of sustainability of rural primary care services in the face of ongoing policy change  
29  
30 on reimbursement and practice incentives [38], adoption of new funding models to ensure  
31  
32 availability of needed medicines [25], and adjusting hospital capital investments to improve  
33  
34 patient access to care [37]. Articles also discussed the importance of balancing financial interests  
35  
36 with social and ecological interests [40].  
37  
38  
39  
40  
41

42 Several papers conceptualised SPHS as the continuation of programs after the cessation of initial  
43  
44 external program-specific funding [41-43]. This aligns with findings from a recent systematic  
45  
46 review that specifically focused on the sustainability of health improvement programs[44].  
47  
48

49 Conceptualising sustainability of programs or interventions as an integral part of SPHS is  
50  
51 sensible. However, it is desirable for such definitions to be broadened to include the impacts of  
52  
53 sustained programs and interventions at the whole of system level.  
54  
55  
56  
57

Four articles [45-48] discussed SPHS through the lens of a learning health system, a system in which ‘science, informatics, incentives, and culture are aligned for continuous improvement and innovation’[49]. These articles focussed predominantly on using data and evidence to support system adaptability and improvement over time.

**Table 2.** Definitions of SPHS

| Definition                                                                     | Exemplar Quotes                                                                                                                                                                                                                                                                                                                                                      | Relevant References |                                |                      |
|--------------------------------------------------------------------------------|----------------------------------------------------------------------------------------------------------------------------------------------------------------------------------------------------------------------------------------------------------------------------------------------------------------------------------------------------------------------|---------------------|--------------------------------|----------------------|
|                                                                                |                                                                                                                                                                                                                                                                                                                                                                      | Empirical articles  | Editorials or opinion pieces   | Reviews              |
| Fiscal sustainability                                                          | “The WHO considers fiscal sustainability as a requirement, rather than an objective, of health financing policy. Sustainability of healthcare financing therefore cannot be interpreted as a reduction of healthcare costs, but rather as a predictable growth or control of health expenditures.”[25]                                                               | [37, 38, 50, 51]    | [25, 33, 34, 36, 39, 41, 52]   | [42, 43, 50, 53, 54] |
| Human resource sustainability and acceptability to stakeholders                | “It has been increasingly recognised that getting HR policy and management "right" has to be at the core of any sustainable solution to health system performance”[33, 35]<br>“A sustainable health system also has acceptability to key constituents, including patients and health professionals.” [34]                                                            | [51]                | [33-36, 40, 52, 55-60]         | [32, 54]             |
| Adaptability and improvement over time to create a future-focused intervention | “A sustainable health system ... [has] adaptability, because health and health care needs are not static (i.e., a health system must respond adaptively to new diseases, changing demographics, scientific discoveries, and dynamic technologies in order to remain viable).”[34]<br>“Ensuring that sufficient resources are available over the long term to provide | [38, 46]            | [5, 34, 41]<br>[45, 52, 57-67] | [32, 53, 54, 68, 69] |

---

timely access to quality services that address Canadians' evolving health needs." [61]

---

### *Measuring SPHS*

The measurement of SPHS was addressed through theoretical discussions across the 24 editorials and seven review articles, and by proposing, developing, or applying measures or indicators (in 17 empirical studies). There are interesting contrasts in the levels at which measurement occurred or was recommended—that is, the boundaries of the 'healthcare system' were variously conceptualised across studies when talking about measures. The complex problem of where to appropriately bound a system has been identified as both interesting and problematic [70]. For example, some studies measure SPHS at a hospital level [71], whereas other studies address it at a national system level [72], making comparisons across studies difficult.

Frameworks and indicators to measure SPHS were heterogeneous (Table 3). The need to measure financial, social and health outputs of health systems were highlighted in recent publications [73]. Some articles criticised the current focus on fiscal metrics of SPHS [36, 74]. Sepehri and Chernomas [36] noted that fiscal metrics assume that providers respond to needs and current medical knowledge, however, this assumption does not always hold. Population health outcomes, such as mortality or burden of chronic disease, were also considered valid indicators of SPHS, but required ongoing timely measurement over the long-term to demonstrate trends and to model future needs [69, 75].

A recent paper [76] suggested that composite metrics combining quality of care, equity of access and health spending may provide a more nuanced measure of SPHS [76]. A variety of new SPHS

measures were proposed, developed, modified, or tested in research environments [21, 23, 48, 68, 71, 77] to address a deficit in currently available measures (Table 3). For example, the Q\*Scale was designed to combine data on caseload, patient satisfaction and physician aptitude, such that changes in hospital performance due to policy changes could be more effectively measured [71]. In contrast, the Dynamic Sustainability Framework (DSF) seeks to investigate the fit between the intervention, practice settings, contexts and cultures, health policies, and the broader ecology within which healthcare systems operate, including socio-political systems [41]. Similarly, the Health Care Sustainability Framework (HCSF) and the Responsible Innovations for Health (RIH) framework, recognise the importance of accounting for the needs and trends of the population, workforce, and financial constraints [78, 79].

Models utilising a scoring system (e.g. using the Resilience Indicator) to quantify healthcare resilience were based on data-driven simulation modelling,[80] or theoretical composite indicators of the value of healthcare systems [80, 81]. However, the extent to which such models and indicators are used to support decision making in the real world is currently uncertain.

**Table 3.** Summary of established and novel frameworks suggested for measuring SPHS

| <b>Established framework name</b>                    | <b>Rationale for use</b>                                                                                       |
|------------------------------------------------------|----------------------------------------------------------------------------------------------------------------|
| Organisational Change Model (OCM)                    | To measure the success of sustained organisational change, according to faculty member survey respondents [77] |
| Analysis of hospital records (e.g., payroll records) | Measuring staff turnover, workforce supply and financial sustainability [23, 27]                               |
| Evaluation of health networks                        | To evaluate the effectiveness and sustainability of health networks [82]                                       |
| <b>Novel framework name</b>                          | <b>Rationale for development</b>                                                                               |
| Q* Scale                                             | To measure performance at the hospital level [71]                                                              |

|                                                    |                                                                                                                                                                           |
|----------------------------------------------------|---------------------------------------------------------------------------------------------------------------------------------------------------------------------------|
| Dynamic Sustainability Framework (DSF)             | To investigate the fit between the intervention, the practice setting, and the ecological system [41]<br>To improve measurement of SPHS beyond patient outcomes only [42] |
| Resilience Indicator                               | To highlight the systemic relevance of primary care network systems to quantify healthcare resilience [80]                                                                |
| eMergy (embodied energy) Sustainability Index      | To address the lack of qualitative indicators for sustainability [68]                                                                                                     |
| Future Health Index (FHI)                          | To identify preparedness of countries to building sustainable health systems [81]                                                                                         |
| Health Care Sustainability Framework (HCSF)        | To measure the relationships between political and fiscal sustainability of an intervention [78]                                                                          |
| Responsible Innovations for Health (RIH) Framework | To identify interventions that suitably address five domains (population health, healthcare system, economic, organisational, environmental)[79]                          |
| Research Lifecycle Framework                       | To enhance the impact of the Learning Health System by operationalising research innovations into clinical practice [48]                                                  |
| Value Of Diagnostic Information (VODI) Framework   | To outline the multidimensional benefits and potential of healthcare diagnostics [83]                                                                                     |

Ultimately, although measurements of sustainability were heterogeneous [42], they could be classified into three broad outcome levels: 1) Individual (e.g., continued health benefits for patients or healthcare providers), 2) Organisational (e.g., continuation of innovations, hospital level fiscal improvements), or 3) Community (e.g., continued use of programs, services or health interventions). The frameworks presented in Table 4 promise more nuanced measures of SPHS. However, these need to undergo robust testing in different systems and contexts to ensure they provide valid, meaningful information to support SPHS.

### ***Identified Challenges to SPHS***

1  
2  
3 Ninety-four articles, including 60 editorials, 22 empirical studies and 12 reviews, identified  
4 challenges to SPHS across three main themes: 1) increasingly complex patient populations; 2)  
5 ongoing gaps between policy and practice; and 3) concerns of system fragmentation and need for  
6 integration for a more streamlined adoption and sustainment of interventions.  
7  
8  
9  
10  
11  
12

13  
14 Numerous articles identified challenges posed by increasingly complex patient populations [4,  
15 24, 52, 80, 84-90], including complex patients with multiple comorbidities,[22, 51, 80, 85, 86,  
16 88, 91, 92] and greater demand for effective aged care, under already strained healthcare budgets  
17 [4, 28, 52, 59, 93-98]. In addition, patients also have higher expectations of receiving healthcare  
18 of high quality that meets their needs [5, 22, 85, 86, 88, 99, 100]. Healthcare systems must strive  
19 to understand the populations they currently serve and to adapt as populations and their needs  
20 change.  
21  
22  
23  
24  
25  
26  
27  
28  
29  
30  
31  
32

33 A recurring discussion centred on the gap between policy and practice [42, 101, 102]. To bridge  
34 this gap, greater investment in the system is sought,[36, 64, 74, 94, 95], including funding novel  
35 health interventions [27, 42, 55, 103, 104] and upskilling staff [31, 105]. For example, one article  
36 highlighted several challenges in realising the latter, including inadequate stakeholder  
37 involvement and organisational leadership unwilling to invest in training programs [31, 46]. To  
38 sustain performance, publicly funded health services will need to balance financial,  
39 environmental, and social sustainability, whilst withstanding greater public scrutiny [40, 106].  
40 Additionally, governments may need to reconcile higher cost and greater usage of healthcare with  
41 flattening health expenditure and reduced spending in other areas [29, 65, 104].  
42  
43  
44  
45  
46  
47  
48  
49  
50  
51  
52  
53  
54  
55  
56  
57  
58  
59  
60

1  
2  
3 The fragmentation of healthcare systems poses challenges for sustained performance: power  
4 imbalances among health personnel and resistance to changes in the scope of practice for some  
5 professions limits team approaches to care [107, 108]; siloed care delivery models can become  
6 misaligned with the complexity of the healthcare system and complex patient needs [57, 78, 109,  
7 110]. Other publications reported lack of collaboration between public and private hospitals [97,  
8 111]; and widening gaps in care quality in rural/remote regions due to limited resources [24, 38,  
9 97, 112]. Poor linkage of primary care with the broader health system [69] and lack of investment  
10 in primary care can also impact health outcomes and health system sustainability [87].  
11  
12  
13  
14  
15  
16  
17  
18  
19  
20  
21  
22  
23

### 24 ***Opportunities for Improvement of SPHS***

25  
26 To address the challenges posed, requires more than a one-time simple "fix". Adaptation to local  
27 contexts, and ongoing monitoring and evaluation are required to support the sustainment of  
28 effective solutions and to anticipate future needs and solutions [77]. Twelve review articles, 19  
29 empirical articles, and 56 editorials discussed the opportunities for improving SPHS.  
30  
31  
32  
33  
34  
35  
36  
37

38 Workplace culture in healthcare was identified as an important capacity building factor for  
39 sustained system improvement. The importance of physician self-care and well-being was  
40 highlighted in numerous studies [47, 101, 113, 114], and was strongly linked with the culture of  
41 the organisation, workplace, and system [18]. The importance of mentorship, teaching and  
42 leadership were also highlighted as enablers of organisational improvements [20, 46, 100, 101].  
43 Building supportive cultures and expectations of medical graduates is crucial [111, 114-116].  
44 Furthermore, promoting incentives for generalist doctors to practice rurally may close the current  
45 geographical gap in access to healthcare [47, 112, 115-117]. The promotion of desired attitudes,  
46 values and ideals of healthcare organisations was also recognised for achieving SPHS.  
47  
48  
49  
50  
51  
52  
53  
54  
55  
56  
57  
58  
59  
60

1  
2  
3 Specifically, valuing and practicing patient-centred care and evidence-based medicine was  
4 reported to promote system sustainability [31, 47, 67, 85, 90, 91, 117, 118]. Successful  
5  
6 collaboration between and within health facilities, disciplines, and sectors is important for system  
7  
8 sustainability [45, 51, 111, 118-121], and collaboration is facilitated by human resource  
9  
10 management that values the workforce, use of robust data-driven hospital management systems,  
11  
12 and accessible, shared electronic medical record systems [99, 122].  
13  
14  
15  
16  
17  
18

19 The importance of political stability and bridging the jurisdictional-federal divide in federated  
20  
21 healthcare systems (such as in the US, Canada, and Australia) was also emphasised as important  
22  
23 for optimal and unified healthcare system functioning [25, 54, 94, 95, 123, 124]. Therefore, it is  
24  
25 not only organisational culture in healthcare [125], but the broader organisation, governance and  
26  
27 regulation of the healthcare system that are crucially important for SPHS [66, 126, 127]. The  
28  
29 impacts of fragmentation in federated systems were recently highlighted by the COVID-19  
30  
31 pandemic. For example, in Australia the aged care system is funded and regulated by the Federal  
32  
33 Government, while the states and territories are responsible for hospitals and public health [128].  
34  
35 This contributed to uncoordinated responses to COVID-19 in residential aged care facilities, with  
36  
37 consequent outbreaks and lives lost [129].  
38  
39  
40  
41  
42  
43

44 Community involvement is an important factor that bolsters capacity to implement and sustain  
45  
46 change [122]. Empowering patients to care for their own health, and building confidence among  
47  
48 caregivers to deliver some aspects of care, reduces burden on the healthcare system [85]. On the  
49  
50 other hand, it shifts costs to families and neighbourhoods. Community involvement via  
51  
52  
53 Community Based Participatory Research (CBPR) bolsters equity and improves outcomes of care  
54  
55  
56  
57  
58  
59  
60



1  
2  
3 [130], and responding to recommendations from citizen panels could also improve SPHS [98,  
4  
5 121, 131].  
6  
7  
8  
9

10 As technology advances, so does the ability to harness it to promote the sustainability of  
11 healthcare systems [34]. For example, point-of-care electronic prompts were used in one study of  
12 hospital surgical wards to decrease rates of hospital-acquired infections [132] and embedding  
13 artificial intelligence and big data analytics hold promise to support efficient and effective service  
14 delivery to improve SPHS [57]. Other studies have suggested greater adoption of telemedicine to  
15 reduce travel time and costs [5] as complementary support to patients [103], to improve  
16 diagnostics [83], and as a platform to promote prevention of illness [24], as contributing to SPHS.  
17  
18  
19  
20  
21  
22  
23  
24  
25  
26  
27

### 28 ***Sustaining and Scaling Change in SPHS***

29 Forty-seven articles addressed this theme, including nine reviews, 11 empirical articles and 27  
30 editorials. Various common factors were found, including the importance of stakeholders'  
31 support in sustaining an intervention, strong relationships among organisations within the system,  
32 and the ability to flex and adapt in response to changes in contexts.  
33  
34  
35  
36  
37  
38  
39  
40  
41

42 As interventions are often implemented with limited and/or short-term (2-3 year) evaluation  
43 plans, demonstrating SPHS is often elusive [42]. Extended funding periods for improvement and  
44 reform strategies are needed and should be coupled with ongoing evaluations using relevant  
45 SPHS indicators to support ongoing sustainability, adaptation, and evidence-based investment  
46 and resourcing [54]. For example, one article postulated that federal funding agencies should  
47 perceive funding implementations of health innovations as ongoing strategic investments rather  
48 than time-limited projects [45]. Only one article disagreed with the importance of measuring  
49  
50  
51  
52  
53  
54  
55  
56  
57  
58  
59  
60

1  
2  
3 sustainability altogether, and argued for a focus on healthcare quality as opposed to conducting  
4 formative evaluations [104]. Although the delivery of efficient and effective healthcare should be  
5 prioritised, robust evaluations should not be overlooked as a prerequisite and must be embedded  
6 alongside implementation, from the outset [133].  
7  
8  
9  
10  
11  
12

13  
14 Another recurring theme was the importance of accepting changes or adaptations to proposed  
15 interventions [134]. For example, Greenhalgh *et al* [135] reported on a three-year case study  
16 follow-up of a healthcare system transformation in London and found that the changes were  
17 sustained, but in different formats than originally envisaged. This adaptation of interventions to  
18 local and changing contexts is a strong characteristic of SPHS that is recognised as one of the  
19 hallmarks of implementation science. The increasing adoption of pragmatic implementation trials  
20 in healthcare research is an important advance to support effectiveness testing in real-life  
21 situations rather than in contrived randomised controlled trials that are difficult to implement at  
22 scale in real-world settings to meet the needs of changing populations [48, 136].  
23  
24  
25  
26  
27  
28  
29  
30  
31  
32  
33  
34  
35  
36

37 A recurring sentiment in the articles reviewed was the importance of support for the intervention  
38 from leaders and stakeholders expected to continue implementing change [67, 84, 122, 125, 137,  
39 138]. Leaders and managers have a clear role in supporting staff throughout the processes of  
40 reforms and changes, by providing opportunities for co-design, education including e-learning,  
41 and building peer networks [64, 139] whilst creating open communication to involve front-line  
42 staff in planning and implementation [122, 140]. For example, one article suggested that  
43 pharmacists should be involved in developing hospital discharge procedures to improve  
44 medication safety and adherence [141]. In more recent articles, policy makers and political  
45  
46  
47  
48  
49  
50  
51  
52  
53  
54  
55  
56  
57  
58  
59  
60

1  
2  
3 leaders are highlighted as important change agents as long as they work in concert with front-line  
4 health staff [54, 138, 142].  
5  
6  
7  
8  
9

10 Effective relationships among different healthcare delivery organisations were repeatedly  
11 identified as important enablers of SPHS. A central funding source coupled with policies and  
12 algorithms for equitable distribution of healthcare funds was evident, and particularly prioritised  
13 by rural areas [38, 74]. Beyond the government, communities and multi-sectorial partners [52],  
14 and collaborations between hospitals, medical schools and physicians were also highlighted as  
15 vital for SPHS [73].  
16  
17  
18  
19  
20  
21  
22  
23  
24  
25

26 Although publications in our review predominantly urged for the sustainability of innovations,  
27 recent literature also highlights the need for discontinuation or redesign of programs that have  
28 become ineffective or irrelevant over time [5, 41, 135]. This is extremely important to achieve  
29 sustainability as it ensures that value is maintained in the healthcare system, especially  
30 considering that healthcare systems may be slow to change and tend to maintain status quo [143].  
31 Hence, purposeful work, including embedding ongoing monitoring and evaluation is needed to  
32 drive healthcare systems towards more nimble models of operation that are responsive and  
33 adaptable and able to anticipate changing needs.  
34  
35  
36  
37  
38  
39  
40  
41  
42  
43  
44  
45  
46

47 Table 4 summarises the included articles under five headings: those that attempt to define  
48 sustainability; those that focus on measuring it; associated challenges of realising sustainable  
49 performance; identifying opportunities for improvement; and creating and sustaining  
50 sustainability.  
51  
52  
53  
54  
55  
56  
57  
58  
59  
60

**Table 4.** Grouping of included articles based on the following criteria

| Criteria                      | Explanation                               | Key points from included articles                                                                                                                                                                                                                                                                                                                                                                                                                                                                                                                                                                                                 |
|-------------------------------|-------------------------------------------|-----------------------------------------------------------------------------------------------------------------------------------------------------------------------------------------------------------------------------------------------------------------------------------------------------------------------------------------------------------------------------------------------------------------------------------------------------------------------------------------------------------------------------------------------------------------------------------------------------------------------------------|
| Defining sustainability       | What do we mean by SPHS?                  | <ul style="list-style-type: none"> <li>- SPHS is difficult to define [30, 32-34]</li> <li>- Sustainability is most often framed in terms of fiscal/financial or economic sustainability [5, 25, 33, 34, 36-39, 68]</li> <li>- Sustaining a system intervention post-implementation and initial funding period [41-43]</li> </ul>                                                                                                                                                                                                                                                                                                  |
| Measuring                     | How do we measure SPHS?                   | <ul style="list-style-type: none"> <li>- Issue of system boundaries—at which level should we measure sustainability? (e.g., at the individual hospital or healthcare system level)[71, 72]</li> <li>- Heterogeneous outcome data collection techniques (e.g., individual, organisation and community level)[36, 42, 73, 74]</li> <li>- Wide variety of new methods and indicators suggested (see Table 3)[21, 23, 68, 71, 77, 79]</li> </ul>                                                                                                                                                                                      |
| Associated challenges         | What challenges are associated with SPHS? | <ul style="list-style-type: none"> <li>- Complex patient population (e.g., ageing, comorbidities and chronic illnesses)[4, 5, 22, 28, 52, 84-86, 91-97, 99]</li> <li>- The chasm between evidence and practice and policy and practice [27, 29, 36, 42, 55, 64, 65, 74, 94, 95, 101-106]</li> <li>- Fragmentation and gaps (e.g., power imbalances between healthcare personnel, rural versus urban services, fragmentation between public and private hospitals)[38, 77, 78, 97, 107-109, 111]</li> </ul>                                                                                                                        |
| Opportunities for improvement | What helps improve SPHS?                  | <ul style="list-style-type: none"> <li>- Workplace culture (e.g., mentorship, leadership, support for health professionals)[18, 20, 101, 112, 113, 115, 116]</li> <li>- Organisational culture (e.g., promoting collaborative attitudes, transparency, patient-centred care and political stability)[25, 85, 91, 94, 95, 99, 111, 119, 122-124]</li> <li>- Consumer and community involvement to align the system with needs (e.g., patient reported measures, in research, focus groups, and consumer panels)[85, 122, 130, 131]</li> <li>- Implementing technological advances (e.g., e-health)[5, 24, 34, 103, 132]</li> </ul> |
| Sustaining and scaling        | What initiatives for have been            | <ul style="list-style-type: none"> <li>- Setting up interventions for sustainability (e.g., extended initial funding periods, ongoing evaluation</li> </ul>                                                                                                                                                                                                                                                                                                                                                                                                                                                                       |

---

|             |                                                          |
|-------------|----------------------------------------------------------|
| used to     | feedback loops, using pragmatic trial designs)[42, 104,  |
| improve and | 132, 144]                                                |
| maintain to | - Support from all stakeholders [52, 64, 84, 122, 137,   |
| SPHS (or    | 139-141]                                                 |
| value)?     | - Developing cross-sectoral, interdisciplinary           |
|             | relationships and collaborations [38, 73, 74, 85]        |
|             | - Ability of intervention to adapt and flex depending on |
|             | the context of implementation [135]                      |

---

## Conclusion

There is broad agreement that the sustainability of healthcare systems and their performance levels are increasingly being challenged. Our review confirms that the concept of SPHS is important and is frequently discussed in the health and medical literature. Despite discussing healthcare system sustainability, only 38 of 142 documents offered any definition, and the offered definitions were mostly centred on financial or economic indicators. More recent concepts defining SPHS included acceptability of the system to patients, healthcare providers and other stakeholders, adaptation and resilience, and sufficient nimbleness to absorb new evidence and innovations to support continuous improvements.

It is unlikely that we will, nor should we, settle on a single definition of SPHS. We would favour definitions that are robust but flexible to ensure their utility in the many and varied healthcare system contexts, however, authors and editors should strive to ensure that a definition is provided in any discussions of SPHS. We need sophisticated yet practical indicators of SPHS that capture sustainability beyond the traditional economic measures. Such measures have been proposed in the research literature but the utility of such measures for decision-making needs to be tested. The key ways to improve sustained performance include strengthening of workplace cultures, continuous workforce development, direct health consumer and community involvement, and

1  
2  
3 swift adoption and embedding of new evidence and technologies that are proven to have an  
4  
5 advantage over current practice.  
6  
7  
8  
9

### 10 **List of Abbreviations:**

|           |                                                                   |
|-----------|-------------------------------------------------------------------|
| 11 AACODS | Authority Accuracy Coverage Objectivity Date Significance         |
| 12        |                                                                   |
| 13 DFS    | Dynamic Sustainability Framework                                  |
| 14        |                                                                   |
| 15 HCFS   | Health Care Sustainability Framework                              |
| 16        |                                                                   |
| 17 OCM    | Organisational Change Model                                       |
| 18        |                                                                   |
| 19 PRISMA | Preferred Reporting Items for Systematic review and Meta-Analysis |
| 20        |                                                                   |
| 21 RIH    | Responsible Innovations for Health                                |
| 22        |                                                                   |
| 23 SPHS   | Sustainable Performance of Healthcare Systems                     |
| 24        |                                                                   |
| 25 WHO    | World Health Organisation                                         |
| 26        |                                                                   |
| 27        |                                                                   |
| 28        |                                                                   |
| 29        |                                                                   |
| 30        |                                                                   |
| 31        |                                                                   |
| 32        |                                                                   |

### 33 **Additional Files**

34  
35 **Additional File 1: SEARCH STRATEGY AND SUMMARY OF INCLUDED PAPERS**

36  
37 (Zurynski\_HerkesAdditionalFile1.docx)

38  
39 **Additional File 2: QUALITY ASSESSMENT (Zurynski\_Herkes\_AdditionalFile2.docx)**

40  
41 **Additional File 3: PRISMA CHECKLIST (Zurynski\_Herkes\_AdditionalFile3.docx)**

42  
43 **Additional File 4: INCLUSION AND EXCLUSION CRITERIA**

44  
45 (Zurynski\_Herkes\_AdditionalFile4.docx)

### 46 47 48 49 50 **Declarations**

51  
52 **Ethics approval and consent to participate**

53  
54 Not applicable.

### **Authors' contributions**

JB conceptualised the study and led the team's work. EM, JH, JHo and YZ developed the search strategy. EM, JH, JHo, GD, and YZ conducted the abstract review, and JH, GD, IM and YZ full-text review and data extraction, with JB acting as arbitrator when needed. JH, IM and GD conducted the quality assessment. YZ and JH drafted the manuscript with input from GD and NH, and all authors contributed their comments and approved of the final version of the manuscript.

### **Funding**

This work was supported by the NHMRC Partnership Centre for Health System Sustainability (Grant ID 9100002) and NHMRC Investigator Grant APP1176620.

### **Competing interests**

There are not competing interests.

### **Patient consent for publication**

Not applicable.

### **Provenance and peer review**

Not commissioned; externally peer reviewed.

### **Availability of data and materials**

The datasets used and/or analysed during the current study are available from corresponding author on reasonable request.

### **Acknowledgements**

We gratefully acknowledge Kelly Nguyen for administrative and logistical support.

## References

1. Dickersin K. The existence of publication bias and risk factors for its occurrence. *JAMA* 1990;263:1385-9.
2. OECD. Fiscal sustainability of health systems: bridging health and finance perspectives. Paris, France: OECD Publishing 2015.
3. Global, regional, and national disability-adjusted life-years (DALYs) for 315 diseases and injuries and healthy life expectancy (HALE), 1990-2015: a systematic analysis for the Global Burden of Disease Study 2015. *Lancet* 2016;388:1603-58.
4. Amalberti R, Nicklin W, Braithwaite J. Preparing national health systems to cope with the impending tsunami of ageing and its associated complexities: Towards more sustainable health care. *Int J Qual Health Care* 2016;28:412-4.
5. Coiera E, Hovenga EJ. Building a sustainable health system. *Yearb Med Inform* 2007;11-8.
6. Fisher ES, Bynum JP, Skinner JS. Slowing the growth of health care costs - lessons from regional variation. *N Engl J Med* 2009;360:849-52.
7. Zhi M, Ding EL, Theisen-Toupal J, et al. The landscape of inappropriate laboratory testing: a 15-year meta-analysis. *PLOS One* 2013;8:e78962-e.
8. Braithwaite J, Ludlow K, Testa L, et al. Built to last? The sustainability of healthcare system improvements, programs and interventions: a systematic integrative review. *BMJ Open* 2020;10:e036453.
9. PCHSS. Vision and Purpose, Sydney, Australia: NHMRC Partnership Centre for Health System Sustainability, 2021. Available from: <https://healthsystemsustainability.com.au/vision-for-health-system-sustainability>. [Accessed November 2021].
10. Piña IL, Cohen PD, Larson DB, et al. A framework for describing health care delivery organizations and systems. *Am J Public Health* 2015;105:670-].
11. Lennox L, Maher L, Reed J. Navigating the sustainability landscape: a systematic review of sustainability approaches in healthcare. *Implement Sci* 2018;13.
12. Wiltsey Stirman S, Kimberly J, Cook N, et al. The sustainability of new programs and innovations: a review of the empirical literature and recommendations for future research. *Implement Sci* 2012;14:17.
13. Arksey H, O'Malley LO. Scoping studies: towards a methodological framework. *Int J Soc Res Methodol* 2005;8:19-32.
14. Moher D, Liberati A, Tetzlaff J, et al. Preferred reporting items for systematic reviews and meta-analyses: the PRISMA statement. *PLoS Med* 2009;6:e1000097.
15. Shamseer L, Moher D, Clarke M, et al. Preferred reporting items for systematic review and meta-analysis protocols (PRISMA-P) 2015: elaboration and explanation. *BMJ* 2015;349:g7647.
16. Hawker S, Payne S, Kerr C, et al. Appraising the evidence: reviewing disparate data systematically. *Qual Health Res* 2002;12:1284-99.
17. Lorenc T, Pettigrew M, Whitehead M. Appendix 5: quality assessment for the systematic review of qualitative evidence. In: Research PH, editor. *Crime, Fear of Crime and Mental Health: Synthesis of Theory and Systematic Reviews of Interventions and Qualitative Evidence*. 2.2. Southampton, United Kingdom: NIHR Journals Library; 2014.
18. Braithwaite J, Herkes J, Ludlow K, et al. The association between organisational and workplace cultures, and patient outcomes: systematic review. *BMJ Open* 2017;7:e017708.
19. Landis J, Koch G. The measurement of observer agreement for categorical data. *Biometrics* 1977;33:159-74.
20. Stockdale SE, Zuchowski J, Rubenstein LV, et al. Fostering evidence-based quality improvement for patient-centered medical homes: initiating local quality councils to transform primary care. *Health Care Manag Rev* 2018;43:168-80.



21. Lizarondo L, Turnbull C, Kroon T, et al. Allied health: integral to transforming health. *Aust Health Rev* 2016;40:194-204.
22. Robertson J, Walkom EJ, Henry DA. Health systems and sustainability: doctors and consumers differ on threats and solutions. *PLoS One* 2011;6:e19222.
23. Fox LA, Walsh KE, Schainker EG. The creation of a pediatric hospital medicine dashboard: performance assessment for improvement. *Hosp Pediatr* 2016;6:412-9.
24. Pencheon D. Developing a sustainable health and care system: lessons for research and policy. *J Health Serv Res Policy* 2013;18:193-4.
25. Inotai A, Petrova G, Vitezic D, et al. Benefits of investment into modern medicines in Central-Eastern European countries. *Expert Rev Pharm Out* 2014;14:71-9.
26. Sepehri A. Does autonomization of public hospitals and exposure to market pressure complement or debilitate social health insurance systems? Evidence from a low-income country. *Int J Health Serv* 2014;44:73-92.
27. Zhao Y, Russell DJ, Guthridge S, et al. Long-term trends in supply and sustainability of the health workforce in remote Aboriginal communities in the Northern Territory of Australia. *BMC Health Serv Res* 2017;17:836.
28. Sonnenreich P, Geisler L. Covering the cost of the cure: from hepatitis C to cancer, new therapies are straining a system plagued by inefficiency. *P & T* 2016;41:565-89.
29. Stuart B, D'Onofrio CN, Boatman S, et al. CHOICES: promoting early access to end-of-life care through home-based transition management. *J Palliat Med* 2003;6:671-83.
30. Rees GH. Organisational readiness and Lean Thinking implementation: findings from three emergency department case studies in New Zealand. *Health Serv Manage Res* 2014;27:1-9.
31. Ammentorp J, Bigi S, Silverman J, et al. Upscaling communication skills training - lessons learned from international initiatives. *Patient Educ Couns* 2021;104:352-9.
32. Braithwaite J, Marks D, Taylor N. Harnessing implementation science to improve care quality and patient safety: a systematic review of targeted literature. *Int J Qual Health Care* 2014;26:321-9.
33. Shigayeva A, Coker RJ. Communicable disease control programmes and health systems: an analytical approach to sustainability. *Health Policy Plan* 2015;30:368-85.
34. Fineberg HV. Shattuck Lecture. A successful and sustainable health system--how to get there from here. *N Engl J Med* 2012;366:1020-7.
35. Buchan J. What difference does ("good") HRM make? *Hum Resour Health* 2004;2:6.
36. Sepehri A, Chernomas R. Is the Canadian health care system fiscally sustainable? *Int J Health Serv* 2004;34:229-43.
37. Kerr R, Hendrie DV. Is capital investment in Australian hospitals effectively funding patient access to efficient public hospital care? *Aust Health Rev* 2018;23:23.
38. Buykx P, Humphreys JS, Tham R, et al. How do small rural primary health care services sustain themselves in a constantly changing health system environment? *BMC Health Serv Res* 2012;12:81.
39. Cashin A. The challenge of nurse innovation in the Australian context of universal health care. *Collegian* 2015;22:319-24.
40. Buttigieg SC. Innovation Strategies and Health System Guiding Principles to Address Equity and Sustainability in Responsible Innovation in Health Comment on "What Health System Challenges Should Responsible Innovation in Health Address? Insights From an International Scoping Review". *Int J Health Policy Manag* 2019;8:570-2.
41. Chambers DA, Glasgow RE, Stange KC. The dynamic sustainability framework: addressing the paradox of sustainment amid ongoing change. *Implement Sci* 2013;8.
42. Scheirer MA. Is sustainability possible? A review and commentary on empirical studies of program sustainability. *Am J Eval* 2005;26:320-47.

43. Gruen RL, Elliott JH, Nolan ML, et al. Sustainability Science: an integrated approach for health-programme planning. *Lancet* 2008;372:1579-89.
44. Braithwaite J, Testa L, Lamprell G, et al. Built to last? The sustainability of health system improvements, interventions and change strategies: a study protocol for a systematic review *BMJ Open* 2017;7:e018568.
45. Embi PJ, Richesson R, Tenenbaum J, et al. Reimagining the research-practice relationship: policy recommendations for informatics-enabled evidence-generation across the US health system. *JAMIA Open* 2019;2:2-9.
46. Enticott J, Braaf S, Johnson A, et al. Leaders' perspectives on learning health systems: a qualitative study. *BMC Health Serv Res* 2020;20:1087.
47. Clancy C. Creating World-Class Care and Service for Our Nation's Finest: How Veterans Health Administration Diffusion of Excellence Initiative Is Innovating and Transforming Veterans Affairs Health Care. *Permanente Journal* 2019;23.
48. Kilbourne AM, Braganza MZ, Bowersox NW, et al. Research Lifecycle to Increase the Substantial Real-world Impact of Research: Accelerating Innovations to Application. *Med Care* 2019;57 Suppl 10 Suppl 3:S206-s12.
49. 5: A continuously learning health care system. Washington (DC): Committee on the Learning Health Care System in America; Institute of Medicine; 2013.
50. Braithwaite J, Zurynski Y, Ludlow K, et al. Towards sustainable healthcare system performance in the 21st century in high-income countries: a protocol for a systematic review of the grey literature. *BMJ Open* 2019;9:e025892.
51. Pereno A, Eriksson D. A multi-stakeholder perspective on sustainable healthcare: From 2030 onwards. *Futures* 2020;122:102605.
52. Crisp N. What would a sustainable health and care system look like? *BMJ* 2017;358:j3895.
53. Abimbola S, Baatiema L, Bigdeli M. The impacts of decentralization on health system equity, efficiency and resilience: a realist synthesis of the evidence. *Health Policy Plan* 2019;34:605-17.
54. Derakhshani N, Doshmangir L, Ahmadi A, et al. Monitoring Process Barriers and Enablers Towards Universal Health Coverage Within the Sustainable Development Goals: A Systematic Review and Content Analysis. *Clinicoecon Outcomes Res* 2020;12:459-72.
55. Buchan JM, Naccarella L, Brooks PM. Is health workforce sustainability in Australia and New Zealand a realistic policy goal? *Aust Health Rev* 2011;35:152-5.
56. Hovenga EJ. Impact of data governance on a nation's healthcare system building blocks. *Studies in Health Technology & Informatics* 2013;193:24-66.
57. Vainieri M, Noto G, Ferre F, et al. A Performance Management System in Healthcare for All Seasons? *Int J Environ Res Public Health* 2020;17.
58. Editorial. *Healthc Q* 2020;22:1-2.
59. Costa-Font J, Levaggi R. Innovation, aging, and health care: Unraveling "silver" from "red" herrings? *Health Econ* 2020;29 Suppl 1:3-7.
60. Craig N, Robinson M. Towards a preventative approach to improving health and reducing health inequalities: a view from Scotland. *Public Health* 2019;169:195-200.
61. Rosenberg-Yunger ZR, Daar AS, Singer PA, et al. Healthcare sustainability and the challenges of innovation to biopharmaceuticals in Canada. *Health Policy* 2008;87:359-68.
62. Barasa EW, Cloete K, Gilson L. From bouncing back, to nurturing emergence: reframing the concept of resilience in health systems strengthening. *Health Policy Plan* 2017;32:iii91-iii4.
63. Lehoux P, Williams-Jones B, Miller F, et al. What leads to better health care innovation? Arguments for an integrated policy-oriented research agenda. *Journal of Health Services & Research Policy* 2008;13:251-4.
64. Thompson RE. Sustainability as the lynch pin of public policy and industry initiatives. *Physician Exec* 1998;24:52-5.

- 1  
2  
3 65. Mackenzie J. The old care paradigm is dead, long live the new sustainable care paradigm: how can GP commissioning consortia meet the demand challenges of 21st century healthcare? *London J Prim Care (Abingdon)* 2011;4:64-8.
- 4  
5  
6 66. Walsh K. Strengthening primary care: the role of e-learning. *Educ Prim Care* 2019;30:267-9.
- 7  
8 67. Marcotte LM, Moriates C, Wolfson DB, et al. Professionalism as the Bedrock of High-Value Care. *Acad Med* 2020;95:864-7.
- 9  
10 68. Garde S, Hullin CM, Chen R, et al. Towards sustainability of health information systems: how can we define, measure and achieve it? *Stud Health Technol Inform* 2007;129:1179-83.
- 11  
12 69. Barbazza E, Kringos D, Kruse I, et al. Creating performance intelligence for primary health care strengthening in Europe. *BMC Health Serv Res* 2019;19:1006.
- 13  
14 70. Braithwaite J, Churrua K, Long JC, et al. When complexity science meets implementation science: a theoretical and empirical analysis of systems change. *BMC Med* 2018;16:63.
- 15  
16 71. Solon O, Woo K, Quimbo SA, et al. A novel method for measuring health care system performance: experience from QIDS in the Philippines. *Health Policy Plan* 2009;24:167-74.
- 17  
18 72. Bramesfeld A, Amaddeo F, Caldas-de-Almeida J, et al. Monitoring mental healthcare on a system level: country profiles and status from EU countries. *Health Policy* 2016;120:706-17.
- 19  
20 73. Kepros JP, Opreanu RC. A new model for health care delivery. *BMC Health Serv Res* 2009;9:57.
- 21  
22 74. Dhalla I. Canada's health care system and the sustainability paradox. *Can Med Assoc J* 2007;177:51-3.
- 23  
24 75. Measuring universal health coverage based on an index of effective coverage of health services in 204 countries and territories, 1990-2019: a systematic analysis for the Global Burden of Disease Study 2019. *Lancet* 2020;396:1250-84.
- 25  
26 76. Vainieri M, Noto G, Ferre F, et al. A Performance Management System in Healthcare for All Seasons? *International Journal of Environmental Research & Public Health [Electronic Resource]* 2020;17:03.
- 27  
28 77. Molfenter T, Gustafson D, Kilo C, et al. Prospective evaluation of a Bayesian model to predict organizational change. *Health Care Manage Rev* 2005;30:270-9.
- 29  
30 78. Birch S, Murphy GT, MacKenzie A, et al. In place of fear: aligning health care planning with system objectives to achieve financial sustainability. *J Health Serv Res Policy* 2015;20:109-14.
- 31  
32 79. Pacifico Silva H, Lehoux P, Miller FA, et al. Introducing responsible innovation in health: a policy-oriented framework. *Health Res Policy Syst* 2018;16:90.
- 33  
34 80. Lo Sardo DR, Thurner S, Sorger J, et al. Quantification of the resilience of primary care networks by stress testing the health care system. *Proceedings of the National Academy of Sciences of the United States of America* 2019;116:23930-5.
- 35  
36 81. Shen H, Sui Y, Fu Y. Using social choice theory and acceptability analysis to measure the value of health systems. *PLoS One* 2020;15:e0235531.
- 37  
38 82. Cunningham FC, Ranmuthugala G, Westbrook JI, et al. Tackling the wicked problem of health networks: the design of an evaluation framework. *BMJ Open* 2019;9:e024231.
- 39  
40 83. Wurcel V, Cicchetti A, Garrison L, et al. The Value of Diagnostic Information in Personalised Healthcare: A Comprehensive Concept to Facilitate Bringing This Technology into Healthcare Systems. *Public Health Genomics* 2019;22:8-15.
- 41  
42 84. Shaw J, Wong I, Griffin B, et al. Principles for health system capacity planning: insights for healthcare leaders. *Healthc Q* 2017;19:17-22.
- 43  
44 85. Scott IA. Is modern medicine at risk of losing the plot? *Med J Aust* 2006;185:213-6.
- 45  
46 86. Robertson TM, Lofgren RP. Where population health misses the mark: breaking the 80/20 rule. *Acad Med* 2015;90:277-8.
- 47  
48 87. Pisco L, Pinto LF. From Alma-Ata to Astana: the path of Primary Health Care in Portugal, 1978-2018 and the genesis of Family Medicine. *Cien Saude Colet* 2020;25:1197-204.
- 49  
50  
51  
52  
53  
54  
55  
56  
57  
58  
59  
60

- 1  
2  
3 88. Jessup RL, O'Connor DA, Putrik P, et al. Alternative service models for delivery of healthcare  
4 services in high-income countries: a scoping review of systematic reviews. *BMJ Open*  
5 2019;9:e024385.
- 6 89. Rudnicka E, Napierała P, Podfigurna A, et al. The World Health Organization (WHO)  
7 approach to healthy ageing. *Maturitas* 2020;139:6-11.
- 8 90. Quaglio G, Figueras J, Mantoan D, et al. An overview of future EU health systems. An insight  
9 into governance, primary care, data collection and citizens' participation. *J Public Health (Oxf)*  
10 2018;40:891-8.
- 11 91. Knutson DJ. The role of strategic alliances in ensuring health care quality: a health care  
12 system perspective. *Clin Ther* 1997;19:1572-8.
- 13 92. Delgado P. Meeting the challenge of chronic conditions in a sustainable manner: building on  
14 the AHC learning. *Healthc Pap* 2016;15 Spec No:90-5; discussion 7-123.
- 15 93. Veillard J, Denny K. Transformation through clinical and social integration: meeting the  
16 needs of high users of healthcare. *Healthc Pap* 2014;14:4-7.
- 17 94. Stoelwinder JU. Final report of the National Health and Hospitals Reform Commission: will  
18 we get the health care governance reform we need? *Med J Aust* 2009;191:387-8.
- 19 95. Stoelwinder JU, Paolucci F. Sustaining Medicare through consumer choice of health funds:  
20 lessons from the Netherlands. *Med J Aust* 2009;191:30-2.
- 21 96. Magnan S, Fisher E, Kindig D, et al. Achieving accountability for health and health care. *Minn*  
22 *Med* 2012;95:37-9.
- 23 97. Armstrong BK, Gillespie JA, Leeder SR, et al. Challenges in health and health care for  
24 Australia. *Med J Australia* 2007;187:485-9.
- 25 98. Ganann R, Peacock S, Garnett A, et al. Capacity development among academic trainees in  
26 community-based primary health care research: The Aging, Community and Health Research Unit  
27 Experience. *Prim Health Care Res Dev* 2019;20:e139.
- 28 99. Al Dhawi AA, West DJ, Jr., Spinelli RJ, et al. The challenge of sustaining health care in Oman.  
29 *Health Care Manag* 2007;26:19-30.
- 30 100. Thistlethwaite JE, Dunston R, Yassine T. The times are changing: workforce planning, new  
31 health-care models and the need for interprofessional education in Australia. *J Interprof Care*  
32 2019;33:361-8.
- 33 101. Dunn PM, Arnetz BB, Christensen JF, et al. Meeting the imperative to improve physician well-  
34 being: assessment of an innovative program. *J Gen Intern Med* 2007;22:1544-52.
- 35 102. Woodward GL, Iverson A, Harvey R, et al. Implementation of an agency to improve chronic  
36 kidney disease care in Ontario: lessons learned by the Ontario Renal Network. *Healthc Q* 2015;17  
37 Spec No:44-7.
- 38 103. McGorry PD, Hamilton MP. Stepwise expansion of evidence-based care is needed for mental  
39 health reform. *Med J Aust* 2016;204:351-3.
- 40 104. Lewis S. Can a learning-disabled nation learn healthcare lessons from abroad? *Healthc Policy*  
41 2007;3:19-28.
- 42 105. Ehrlich C, Kendall E. Integrating collaborative place-based health promotion coalitions into  
43 existing health system structures: the experience from one Australian health coalition. *Int J Integr*  
44 *Care* 2015;15:e047.
- 45 106. Pencheon D. Making health care more sustainable: the case of the English NHS. *Public Health*  
46 2015;129:1335-43.
- 47 107. Edwards N, Rowan M, Marck P, et al. Understanding whole systems change in health care:  
48 the case of nurse practitioners in Canada. *Policy Polit Nurs Pract* 2011;12:4-17.
- 49 108. Lozano I, Rondan J, Vegas JM, et al. Sustainability of the health system: beyond cost-  
50 effectiveness analyses. *Rev Esp Cardiol* 2016;69:880-1.
- 51 109. Farmanova E, Kirvan C, Verma J, et al. Triple aim in Canada: developing capacity to lead to  
52 better health, care and cost. *Int J Qual Health Care* 2016;28:830-7.
- 53  
54  
55  
56  
57  
58  
59  
60



- 1  
2  
3 110. Iskrov G, Stefanov R, Ferrelli RM. Health systems for rare diseases: financial sustainability. *Ann Ist Super Sanita* 2019;55:270-5.
- 4 111. Buttigieg SC, Schuetz M, Bezzina F. Value chains of public and private health-care services in  
5 a small EU island state: a SWOT analysis. *Public Health Front* 2016;4:201.
- 6 112. Atmore C. The role of medical generalism in the New Zealand health system into the future.  
7 *N Z Med J* 2015;128:50-5.
- 8 113. Levine S, O'Mahony S, Baron A, et al. Training the workforce: description of a longitudinal  
9 interdisciplinary education and mentoring program in palliative care. *J Pain Symptom Manage*  
10 2017;53:728-37.
- 11 114. Lega F, Prenestini A, Spurgeon P. Is management essential to improving the performance  
12 and sustainability of health care systems and organizations? a systematic review and a roadmap for  
13 future studies. *Value Health* 2013;16:S46-S51.
- 14 115. Wakerman J, Humphreys JS. Sustainable primary health care services in rural and remote  
15 areas: innovation and evidence. *Aust J Rural Health* 2011;19:118-24.
- 16 116. Wakerman J, Humphreys JS. Sustainable workforce and sustainable health systems for rural  
17 and remote Australia. *Med J Aust* 2013;199:S14-7.
- 18 117. Lehoux P, Roncarolo F, Silva HP, et al. What Health System Challenges Should Responsible  
19 Innovation in Health Address? Insights From an International Scoping Review. *Int J Health Policy*  
20 *Manag* 2019;8:63-75.
- 21 118. Braithwaite J, Vincent C, Nicklin W, et al. Coping with more people with more illness. Part 2:  
22 new generation of standards for enabling healthcare system transformation and sustainability. *Int J*  
23 *Qual Health Care* 2019;31:159-63.
- 24 119. Tsisis P. Chronic disease management and the home-care alternative in Ontario, Canada.  
25 *Health Serv Manage Res* 2009;22:136-9.
- 26 120. Niraula S. Strategizing health technology assessment for containment of cancer drug costs in  
27 a universal health care system: Case of the pan-Canadian Oncology Drug Review. *Cancer*  
28 2019;125:3100-3.
- 29 121. Bentley C, Peacock S, Abelson J, et al. Addressing the affordability of cancer drugs: using  
30 deliberative public engagement to inform health policy. *Health Res Policy Syst* 2019;17:17.
- 31 122. Rosser M. Advancing health system integration through supply chain improvement. *Healthc*  
32 *Q* 2006;9:62-6, 4.
- 33 123. Guyon A, Hancock T, Kirk M, et al. The weakening of public health: a threat to population  
34 health and health care system sustainability. *Can J Public Health* 2017;108:e1-e6.
- 35 124. Bessler JS, Ellies M. Values and value--a vision for the Australian health care system. *Aust*  
36 *Health Rev* 1995;18:6-17; discussion 8-29.
- 37 125. Ferrelli RM, Fantini B, Taruscio D. Health systems sustainability for rare diseases. Preface.  
38 *Ann Ist Super Sanita* 2019;55:249-50.
- 39 126. Bogaert P, van Oers H, Van Oyen H. Towards a sustainable EU health information system  
40 infrastructure: A consensus driven approach. *Health Policy* 2018.
- 41 127. Fridell M, Edwin S, von Schreeb J, et al. Health System Resilience: What Are We Talking  
42 About? A Scoping Review Mapping Characteristics and Keywords. *Int J Health Policy Manag*  
43 2020;9:6-16.
- 44 128. AIHW. Australia's health 2016. Canberra, ACT: AIHW; 2016.
- 45 129. Anonymous. The impact of COVID-19 on aged care. *Aust Nurs Midwifery J* 2020;26:16.
- 46 130. Casale CR, Clancy CM. Commentary: Not about us without us. *Acad Med* 2009;84:1333-5.
- 47 131. Nagle LM, Pitts BM. Citizen perspectives on the future of healthcare. *Healthc Q* 2012;15:40-5.
- 48 132. Schwann NM, Bretz KA, Eid S, et al. Point-of-care electronic prompts: an effective means of  
49 increasing compliance, demonstrating quality, and improving outcome. *Anesth Analg* 2011;113:869-  
50 76.
- 51  
52  
53  
54  
55  
56  
57  
58  
59  
60

- 1  
2  
3 133. Huynh AK, Hamilton AB, Farmer MM, et al. A pragmatic approach to guide implementation  
4 evaluation research: strategy mapping for complex interventions. *Public Health Front* 2018;6.  
5 134. Kilbourne AM, Braganza MZ, Bowersox NW, et al. Research Lifecycle to Increase the  
6 Substantial Real-world Impact of Research: Accelerating Innovations to Application. *Medical Care*  
7 2019;57 Suppl 10 Suppl 3:S206-S12.  
8 135. Greenhalgh T, Macfarlane F, Barton-Sweeney C, et al. "If we build it, will it stay?" A case  
9 study of the sustainability of whole-system change in London. *Milbank Q* 2012;90:516-47.  
10 136. Glasgow RE, Chambers D. Developing robust, sustainable, implementation systems using  
11 rigorous, rapid and relevant science *Clin Transl Sci* 2012;5:48-55.  
12 137. McVeigh J, MacLachlan M, Gilmore B, et al. Promoting good policy for leadership and  
13 governance of health related rehabilitation: a realist synthesis. *Glob Health* 2016;12:49.  
14 138. De Santis M. Integrated care for healthcare sustainability for patients living with rare  
15 diseases. *Ann Ist Super Sanita* 2019;55:276-82.  
16 139. McIntosh E, Nagelkerk J, Vonderheid SC, et al. Financially viable nurse-managed centers.  
17 *Nurse Pract* 2003;28:40, 6-8, 51.  
18 140. Wutzke S, Benton M, Verma R. Towards the implementation of large scale innovations in  
19 complex health care systems: views of managers and frontline personnel. *BMC Res Notes*  
20 2016;9:327.  
21 141. Burgess LH, Cohen MR, Denham CR. A new leadership role for pharmacists: a prescription  
22 for change. *J Patient Saf* 2010;6:31-7.  
23 142. Hanney S, Kanya L, Pokhrel S, et al. WHO Health Evidence Network Synthesis Reports. What  
24 is the evidence on policies, interventions and tools for establishing and/or strengthening national  
25 health research systems and their effectiveness? Copenhagen: WHO Regional Office for Europe  
26  
27 © World Health Organization 2020.; 2020.  
28  
29 143. Braithwaite J, Glaziou P, Westbrook J. The three numbers you need to know about  
30 healthcare: the 60-30-10 Challenge. *BMC Med* 2020;18.  
31 144. Tricco AC, Ashoor HM, Cardoso R, et al. Sustainability of knowledge translation interventions  
32 in healthcare decision-making: a scoping review. *Implement Sci* 2016;11:55.  
33  
34  
35  
36  
37  
38  
39  
40  
41  
42  
43  
44  
45  
46  
47  
48  
49  
50  
51  
52  
53  
54  
55  
56  
57  
58  
59  
60

**Figure 1.** PRISMA flow diagram summarising the review and reasons for article exclusion\*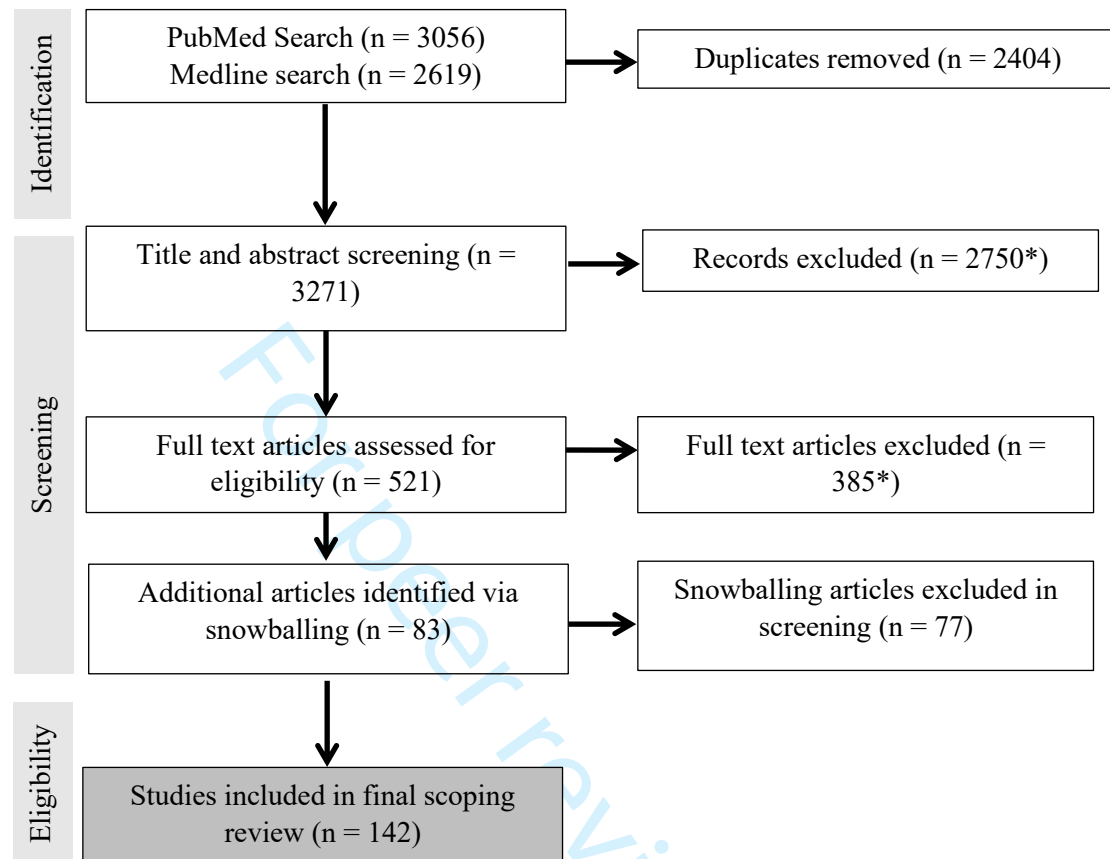

**HOW CAN THE HEALTHCARE SYSTEM DELIVER SUSTAINABLE PERFORMANCE?  
A SCOPING REVIEW**

**ADDITIONAL FILE 1: SEARCH STRATEGY AND SUMMARY OF INCLUDED PAPERS**

**Search Strategy**

|                   | <b>PubMed</b>                                                                                                                                                                                                                   | <b>Ovid Medline</b>                                                                                                                                                                                                                             |
|-------------------|---------------------------------------------------------------------------------------------------------------------------------------------------------------------------------------------------------------------------------|-------------------------------------------------------------------------------------------------------------------------------------------------------------------------------------------------------------------------------------------------|
|                   | ((sustainab*[Title/Abstract])<br>OR resilien*[Title/Abstract])<br>AND (((("health<br>system*" [Title/Abstract]) OR<br>"health system*<br>performance" [Title/Abstract])<br>OR "health system*<br>improvement" [Title/Abstract]) | <ol style="list-style-type: none"> <li>1. "health system* performance"</li> <li>2. "health system* improvement"</li> <li>3. (health adj3 system)</li> <li>4. 1 OR 2 OR 3</li> <li>5. (sustainab* OR resilience*)</li> <li>6. 4 AND 5</li> </ol> |
| Additional Limits | English Language                                                                                                                                                                                                                | English Language                                                                                                                                                                                                                                |
| Yield             | 3056 articles                                                                                                                                                                                                                   | 2619 articles                                                                                                                                                                                                                                   |



1  
2  
3  
4  
5  
6  
7  
8  
9  
10  
11  
12  
13  
14  
15  
16  
17  
18  
19  
20  
21  
22  
23  
24  
25  
26  
27  
28  
29  
30  
31  
32  
33  
34  
35  
36  
37  
38  
39  
40  
41  
42  
43  
44  
45  
46  
47

**Summary of included studies in scoping review and reasons for inclusion**

| <i>Article demographics</i>                            |      |             |        | <i>Reason for article inclusion and summary of results</i> |                   |                                                                                          |                                                                                                |                                                                                                                                                    |          |
|--------------------------------------------------------|------|-------------|--------|------------------------------------------------------------|-------------------|------------------------------------------------------------------------------------------|------------------------------------------------------------------------------------------------|----------------------------------------------------------------------------------------------------------------------------------------------------|----------|
| Reference                                              | Year | Country     | Type * | 1. Definition of HSPS                                      | 2. Measuring HSPS | 3. Challenges to HSPS                                                                    | 4. Improvements to HSPS                                                                        | 5. Sustaining or scaling change is HSPS                                                                                                            | 6. Other |
| Al Dhawi AA, West DJ, Jr., Spinelli RJ, Gompf TA. 2007 | 2007 | Oman        | ED     |                                                            |                   | Increased consumer expectations, increased medication costs, and resource constraints    | The environment, financial sustainability, institutional sustainability, demand sustainability | The need to examine the entire system: social, economic, and environmental determinants of health in order to sustain changes in the health system |          |
| Amalberti , R., W. Nicklin, and J. Braithwaite. 2016.  | 2016 | Worldwide   | ED     |                                                            |                   | Ageing population, patients with comorbidities, and expensive health conditions to treat |                                                                                                |                                                                                                                                                    |          |
| Ament SMC, Gillissen F, Moser A, Maessen JMC,          | 2014 | Netherlands | EM     |                                                            |                   |                                                                                          |                                                                                                | The importance of internal auditing and feedback of outcomes, (e.g., reminders and meetings),                                                      |          |

|    |           |      |           |    |  |  |  |                |  |
|----|-----------|------|-----------|----|--|--|--|----------------|--|
| 1  | Dirksen   |      |           |    |  |  |  | changing       |  |
| 2  | CD, von   |      |           |    |  |  |  | organisational |  |
| 3  | Meyenfel  |      |           |    |  |  |  | structure      |  |
| 4  | dt MF, et |      |           |    |  |  |  |                |  |
| 5  | al. 2014  |      |           |    |  |  |  |                |  |
| 6  |           |      |           |    |  |  |  |                |  |
| 7  |           |      |           |    |  |  |  |                |  |
| 8  |           |      |           |    |  |  |  |                |  |
| 9  | Armstron  | 2007 | Australia | ED |  |  |  |                |  |
| 10 | g BK,     |      |           |    |  |  |  |                |  |
| 11 | Gillespie |      |           |    |  |  |  |                |  |
| 12 | JA,       |      |           |    |  |  |  |                |  |
| 13 | Leeder    |      |           |    |  |  |  |                |  |
| 14 | SR, Rubin |      |           |    |  |  |  |                |  |
| 15 | GL,       |      |           |    |  |  |  |                |  |
| 16 | Russell   |      |           |    |  |  |  |                |  |
| 17 | LM. 2007  |      |           |    |  |  |  |                |  |
| 18 |           |      |           |    |  |  |  |                |  |
| 19 |           |      |           |    |  |  |  |                |  |
| 20 |           |      |           |    |  |  |  |                |  |
| 21 |           |      |           |    |  |  |  |                |  |
| 22 |           |      |           |    |  |  |  |                |  |
| 23 |           |      |           |    |  |  |  |                |  |
| 24 |           |      |           |    |  |  |  |                |  |
| 25 |           |      |           |    |  |  |  |                |  |
| 26 |           |      |           |    |  |  |  |                |  |
| 27 |           |      |           |    |  |  |  |                |  |
| 28 |           |      |           |    |  |  |  |                |  |
| 29 |           |      |           |    |  |  |  |                |  |
| 30 |           |      |           |    |  |  |  |                |  |
| 31 |           |      |           |    |  |  |  |                |  |
| 32 |           |      |           |    |  |  |  |                |  |
| 33 |           |      |           |    |  |  |  |                |  |
| 34 |           |      |           |    |  |  |  |                |  |
| 35 |           |      |           |    |  |  |  |                |  |
| 36 |           |      |           |    |  |  |  |                |  |
| 37 |           |      |           |    |  |  |  |                |  |
| 38 |           |      |           |    |  |  |  |                |  |
| 39 |           |      |           |    |  |  |  |                |  |
| 40 |           |      |           |    |  |  |  |                |  |
| 41 |           |      |           |    |  |  |  |                |  |
| 42 |           |      |           |    |  |  |  |                |  |
| 43 |           |      |           |    |  |  |  |                |  |
| 44 |           |      |           |    |  |  |  |                |  |
| 45 |           |      |           |    |  |  |  |                |  |
| 46 |           |      |           |    |  |  |  |                |  |
| 47 |           |      |           |    |  |  |  |                |  |

1  
2  
3  
4  
5  
6  
7  
8  
9  
10  
11  
12  
13  
14  
15  
16  
17  
18  
19  
20  
21  
22  
23  
24  
25  
26  
27  
28  
29  
30  
31  
32  
33  
34  
35  
36  
37  
38  
39  
40  
41  
42  
43  
44  
45  
46  
47

|                                     |      |             |    |                                                            |                            |                                                                                                                                                                              |                                                                                                                                                                                                                                                                 |  |  |
|-------------------------------------|------|-------------|----|------------------------------------------------------------|----------------------------|------------------------------------------------------------------------------------------------------------------------------------------------------------------------------|-----------------------------------------------------------------------------------------------------------------------------------------------------------------------------------------------------------------------------------------------------------------|--|--|
| Atmore C. 2015                      | 2015 | New Zealand | ED |                                                            |                            | Doctors are becoming more specialised, but needs to become more generalist to look after the whole person                                                                    | Transalpine service model (developed in a rural NZ hospital) provides options for sustainable health care in the future                                                                                                                                         |  |  |
| Barasa EW, Cloete K, Gilson L. 2017 | 2017 | Worldwide   | ED | Resilience is an important quality for creative adaptation |                            | The challenge of thinking of everyday resilience rather than just crises                                                                                                     |                                                                                                                                                                                                                                                                 |  |  |
| Bessler JS, Ellies M. 1995          | 1995 | Australia   | ED |                                                            |                            | Admissions rise, and doctors are using technology more regularly. Public expenditure on healthcare has remained 'flat' but private health care premiums continue to escalate | Need to decrease the amount of beds in the public hospitals (as 15% of inpatients should not be, according to research), increase continuity of patient care (termed 'integrated networks'), and have less of a divide between state and federal health systems |  |  |
| Birch S, Murphy                     | 2015 | Worldwide   | ED |                                                            | Health care sustainability | The unintended consequences of                                                                                                                                               | Sustainability frameworks                                                                                                                                                                                                                                       |  |  |

|                                                                                                                                     |                                                |      |                |    |                                                                                                                                                                                                                   |                                                                                                                                          |                                                                                                                    |                                                                                                                                                  |  |
|-------------------------------------------------------------------------------------------------------------------------------------|------------------------------------------------|------|----------------|----|-------------------------------------------------------------------------------------------------------------------------------------------------------------------------------------------------------------------|------------------------------------------------------------------------------------------------------------------------------------------|--------------------------------------------------------------------------------------------------------------------|--------------------------------------------------------------------------------------------------------------------------------------------------|--|
| 1<br>2<br>3<br>4<br>5<br>6<br>7<br>8<br>9<br>10<br>11<br>12<br>13<br>14<br>15<br>16<br>17<br>18<br>19<br>20<br>21<br>22<br>23<br>24 | GT,<br>MacKenzie A,<br>Cumming<br>J. 2015      |      |                |    | framework (HCSF), showing the relationship between expenditure levels, the determinants of expenditure, revenues to support the health care system, and their relationship to fiscal and political sustainability | redistributing cost of care and responding to the needs of the population e.g., redistributes what socio-economic groups use health care | should take into account the needs and trends of the population, the work force, financial and service information |                                                                                                                                                  |  |
| 25<br>26<br>27<br>28<br>29<br>30<br>31<br>32<br>33<br>34<br>35<br>36<br>37                                                          | Braithwaite, J., D. Marks, and N. Taylor. 2014 | 2014 | Australia      | RA | Sustainability defined as the mid-to-long-term acceptance of a program                                                                                                                                            | Looks at the need to improve implementation science, leading to sustainability                                                           | Sustainability was one of eight key factors in implementing changes in the health system                           | Sustainability needs to be considered from the inception of change programs and projects, and there needs to be commitment at a managerial level |  |
| 38<br>39<br>40<br>41<br>42<br>43<br>44<br>45<br>46<br>47                                                                            | Bramesfeld, A., F. Amaddeo,                    | 2016 | European Union | EM |                                                                                                                                                                                                                   | Measure and compare different                                                                                                            | Recognises the challenge of                                                                                        |                                                                                                                                                  |  |

1  
2  
3  
4  
5  
6  
7  
8  
9  
10  
11  
12  
13  
14  
15  
16  
17  
18  
19  
20  
21  
22  
23  
24  
25  
26  
27  
28  
29  
30  
31  
32  
33  
34  
35  
36  
37  
38  
39  
40  
41  
42  
43  
44  
45  
46  
47

|                                                                                        |      |           |    |                                                                                         |                                                                                        |                                                                                                                                                                                                                                                                          |  |                                           |  |
|----------------------------------------------------------------------------------------|------|-----------|----|-----------------------------------------------------------------------------------------|----------------------------------------------------------------------------------------|--------------------------------------------------------------------------------------------------------------------------------------------------------------------------------------------------------------------------------------------------------------------------|--|-------------------------------------------|--|
| J. Caldas-de-Almeida, G. Cardoso, A. Depaigne-Loth, R. Derenne, V. Donisi et al. 2016. |      | Countries |    |                                                                                         | countries using the QMP-MHC scale                                                      | bridging policy and practice                                                                                                                                                                                                                                             |  |                                           |  |
| Buchan J. 2004.                                                                        | 2004 | Worldwide | ED | Argues that a HR policy is central to any sustainable health system performance changes | Must be sector specific measures e.g., staff per occupied bed, patient acuity measures | The lack of consistent human resource management (HRM), as well as lack of being able to fit HRM to organisational characteristics, context and priorities, and link this to sustainable improvements. No single intervention is likely to be effective in all contexts. |  | There is low take-up of HRM interventions |  |

|                                          |      |                           |    |                                                                                                                                                                                    |                                                                                                                                                                                 |                                                                                                                                                                                                                                                                                                                |                                                                                                                                              |                                                                                                                              |
|------------------------------------------|------|---------------------------|----|------------------------------------------------------------------------------------------------------------------------------------------------------------------------------------|---------------------------------------------------------------------------------------------------------------------------------------------------------------------------------|----------------------------------------------------------------------------------------------------------------------------------------------------------------------------------------------------------------------------------------------------------------------------------------------------------------|----------------------------------------------------------------------------------------------------------------------------------------------|------------------------------------------------------------------------------------------------------------------------------|
| Buchan JM, Naccarella L, Brooks PM. 2011 | 2011 | Australia and New Zealand | ED | The ability for Australia and New Zealand to train enough health staff to fill the positions for their front-line health staff to reduce the reliance on international recruitment | Measurement is limited, e.g., can see if health care staff have received a qualification from a country outside Australia, but not how long they have been working in Australia | Brings into question attitudes of the country towards skilled personnel, immigration, funding of the education sector to train new health personnel (and the time commitment to train new health professionals must also be considered, as must the benefits of overseas personnel for national policy makers) |                                                                                                                                              |                                                                                                                              |
| Burgess LH, Cohen MR, Denham CR. 2010    | 2010 | Worldwide                 | ED |                                                                                                                                                                                    |                                                                                                                                                                                 | Minimizing adverse drug events (ADEs) (and therefore readmissions) by having pharmacist leaders                                                                                                                                                                                                                | Pharmacists need to become leaders to change hospital organisational and safety culture, working within an inter-disciplinary team to ensure | Pharmacists should be involved in medication counselling during the discharge process, and follow-up after the transition to |

1  
2  
3  
4  
5  
6  
7  
8  
9  
10  
11  
12  
13  
14  
15  
16  
17  
18  
19  
20  
21  
22  
23  
24  
25  
26  
27  
28  
29  
30  
31  
32  
33  
34  
35  
36  
37  
38  
39  
40  
41  
42  
43  
44  
45  
46  
47

For peer review only

|                                          |      |       |    |  |  |                                                                                                                                    |                                                                                                                                                                                                                                                                                   |                               |  |
|------------------------------------------|------|-------|----|--|--|------------------------------------------------------------------------------------------------------------------------------------|-----------------------------------------------------------------------------------------------------------------------------------------------------------------------------------------------------------------------------------------------------------------------------------|-------------------------------|--|
|                                          |      |       |    |  |  |                                                                                                                                    | medication and medication issues are managed appropriately. Should also establish a medication review board to investigate near misses, being engaged in teamwork and communication, helping implement computerized systems, and being involved in patient training for discharge | home after hospital discharge |  |
| Buttigieg SC, Schuetz M, Bezzina F. 2016 | 2016 | Malta | EM |  |  | The need for public and private hospital services to work together to solve complex health care problems and benefit both entities | Collaboration between private and public sectors may involve: 1. a regulated semi-competitive health model, whereby the government sets costs (e.g., for specific tests) and citizens are encouraged to                                                                           |                               |  |

|                                            |      |                          |    |                                                                                                                                                                                         |  |                                                                                                                                                                                                |                                                                                                                                                                   |                                                                                      |  |
|--------------------------------------------|------|--------------------------|----|-----------------------------------------------------------------------------------------------------------------------------------------------------------------------------------------|--|------------------------------------------------------------------------------------------------------------------------------------------------------------------------------------------------|-------------------------------------------------------------------------------------------------------------------------------------------------------------------|--------------------------------------------------------------------------------------|--|
|                                            |      |                          |    |                                                                                                                                                                                         |  |                                                                                                                                                                                                | invest in private health insurance;<br>2. Public-private mix model, which makes care more comprehensive and complete; or<br>3. Public-private partnerships (PPPs) |                                                                                      |  |
| Buykx P, Humphreys JS, Tham R, et al. 2012 | 2012 | Australia                | EM | Providing appropriate and cost-effective care in a way that persists in or can adapt to environment. Should also positively influence the broader sustainability of the wider community |  | In rural health services, sustainability is threatened by small population size and lack of economy of scale, poorly management structures, low socioeconomic groups, and geographic isolation |                                                                                                                                                                   | Rural health services are enabled by supportive policy and state and federal support |  |
| Casale CR, Clancy CM. 2009                 | 2009 | United States of America | ED |                                                                                                                                                                                         |  |                                                                                                                                                                                                | Improving equity in health through community-based participatory research                                                                                         |                                                                                      |  |



1  
2  
3  
4  
5  
6  
7  
8  
9  
10  
11  
12  
13  
14  
15  
16  
17  
18  
19  
20  
21  
22  
23  
24  
25  
26  
27  
28  
29  
30  
31  
32  
33  
34  
35  
36  
37  
38  
39  
40  
41  
42  
43  
44  
45  
46  
47

|                                          |      |           |    |                                                                                                                                                              |                                                                                                                                                         |                                                                                                                                                                                                                          |                                                                                                                                                                                                                                |                                                                                                                            |  |
|------------------------------------------|------|-----------|----|--------------------------------------------------------------------------------------------------------------------------------------------------------------|---------------------------------------------------------------------------------------------------------------------------------------------------------|--------------------------------------------------------------------------------------------------------------------------------------------------------------------------------------------------------------------------|--------------------------------------------------------------------------------------------------------------------------------------------------------------------------------------------------------------------------------|----------------------------------------------------------------------------------------------------------------------------|--|
|                                          |      |           |    |                                                                                                                                                              |                                                                                                                                                         |                                                                                                                                                                                                                          | (CBPR). A component of this research is to plan for long-term process and commitment                                                                                                                                           |                                                                                                                            |  |
| Cashin A. 2015                           | 2015 | Australia | ED | A health system must address all aspects of its sustainability , including financial, social and political elements                                          |                                                                                                                                                         | Being unsure if future conservative governments could threaten universal health care, and encouraging nurse innovation in Australia                                                                                      |                                                                                                                                                                                                                                | Issue of encouraging government support that will be politically costly in the short-term, but beneficial in the long term |  |
| Chambers DA, Glasgow RE, Stange KC. 2013 | 2013 | Worldwide | ED | The continued positive effects of the intervention after the external funding has ended. This is expected to be constantly evaluated, developed and improved | The dynamic sustainability framework (DSF) was created to investigate the fit between the intervention, the practice setting, and the ecological system | Two assumptions of sustaining interventions are challenged: 1. 'voltage drop' where interventions yield lower benefits as they are put into practice outside a laboratory setting; and 2. 'program drift' where programs | Ensure focus on sustainability from the beginning of implementation of the intervention, rather than post-implementation. The setting for the intervention is also important e.g., it should focus on organisational learning, |                                                                                                                            |  |

|                                      |      |                          |    |                                                                                                       |                                                                                                 |                                                                                                                                                                                      |                                                                    |                                                                                       |  |
|--------------------------------------|------|--------------------------|----|-------------------------------------------------------------------------------------------------------|-------------------------------------------------------------------------------------------------|--------------------------------------------------------------------------------------------------------------------------------------------------------------------------------------|--------------------------------------------------------------------|---------------------------------------------------------------------------------------|--|
|                                      |      |                          |    |                                                                                                       |                                                                                                 | become less effective due to changes in protocol as it is delivered                                                                                                                  | stakeholders should be involved                                    |                                                                                       |  |
| Cho CC, Ramanan RA, Feldman MD. 2011 | 2011 | United States of America | EM |                                                                                                       | Used analysis of nomination letters for mentor awards to analyse what it is to be a good mentor |                                                                                                                                                                                      | Through mentors being role models and legacies for the future      |                                                                                       |  |
| Coiera E, Hovenga EJ. 2007           | 2007 | Worldwide                | ED | Health systems need to be adaptable to changing contexts and strive to be environmentally sustainable | Making it easier to measure sustainability through increasing transparency in work processes    | Financial challenges of health care costing more than expected, treating higher volumes of patients with more comorbidities and higher expectations of care, and workforce shortages | Digitisation to cut costs e.g., telemedicine to reduce travel time |                                                                                       |  |
| Crisp N. 2017                        | 2017 | United Kingdom           | ED | Internal factors (1. efficiency & effectiveness of health care provision, 2.                          |                                                                                                 | Long term chronic conditions, especially the growing population of                                                                                                                   |                                                                    | The need of the health and care system to be strengthened by support from communities |  |

1  
2  
3  
4  
5  
6  
7  
8  
9  
10  
11  
12  
13  
14  
15  
16  
17  
18  
19  
20  
21  
22  
23  
24  
25  
26  
27  
28  
29  
30  
31  
32  
33  
34  
35  
36  
37  
38  
39  
40  
41  
42  
43  
44  
45  
46  
47

|                          |      |        |    |                                                                                                                                                                                                                                                          |  |                                                                                                                        |  |                              |  |
|--------------------------|------|--------|----|----------------------------------------------------------------------------------------------------------------------------------------------------------------------------------------------------------------------------------------------------------|--|------------------------------------------------------------------------------------------------------------------------|--|------------------------------|--|
|                          |      |        |    | availability of well trained health staff, 3. cost); external (4. population health, 5. contribution of carers and informal networks of care, 6. integration of policies and practices), and overall (7. public and political acceptability and support) |  | elderly with needs for community care                                                                                  |  | and multi-sectorial partners |  |
| De Rosis S, Nuti S. 2018 | 2018 | Italy  | EM |                                                                                                                                                                                                                                                          |  | Lack of a national or regional office responsible for project coordination. Longer-term financial investment is needed |  |                              |  |
| Delgado, P. 2016         | 2016 | Canada | ED |                                                                                                                                                                                                                                                          |  | Quality improvement                                                                                                    |  |                              |  |

|                                                                     |      |                          |    |  |                                                                                                                                           |                                                                                                                                                                                              |                                                                                                                  |                                                                                                                            |  |
|---------------------------------------------------------------------|------|--------------------------|----|--|-------------------------------------------------------------------------------------------------------------------------------------------|----------------------------------------------------------------------------------------------------------------------------------------------------------------------------------------------|------------------------------------------------------------------------------------------------------------------|----------------------------------------------------------------------------------------------------------------------------|--|
|                                                                     |      |                          |    |  |                                                                                                                                           | collaborative systems did not improve the sustainability of participating health systems in the treatment and management of chronic diseases                                                 |                                                                                                                  |                                                                                                                            |  |
| Dhalla I.<br>2007                                                   | 2007 | Canada                   | ED |  | The article speculates that it may be better to assess health care as a proportion of GDP rather than a proportion of Government spending | Politicians are recognising that the 'status quo' may not be sustainable due to system demands. This often assumes tax is static or declining, but this is open to debate and interpretation |                                                                                                                  | Increasing spending on health care can occur as long as it does not impinge upon spending on non-health goods and services |  |
| Dunn, P. M., B. B. Arnetz, J. F. Christensen, and L. Homer.<br>2007 | 2007 | United States of America | EM |  |                                                                                                                                           |                                                                                                                                                                                              | Through a program in which leadership and physicians themselves recognised physician wellbeing as important, and |                                                                                                                            |  |

1  
2  
3  
4  
5  
6  
7  
8  
9  
10  
11  
12  
13  
14  
15  
16  
17  
18  
19  
20  
21  
22  
23  
24  
25  
26  
27  
28  
29  
30  
31  
32  
33  
34  
35  
36  
37  
38  
39  
40  
41  
42  
43  
44  
45  
46  
47

|                                                                                                 |      |           |    |  |  |                                                                                                                                                |                                                                                                   |                                                                                                    |  |
|-------------------------------------------------------------------------------------------------|------|-----------|----|--|--|------------------------------------------------------------------------------------------------------------------------------------------------|---------------------------------------------------------------------------------------------------|----------------------------------------------------------------------------------------------------|--|
|                                                                                                 |      |           |    |  |  |                                                                                                                                                | this well-being was measured                                                                      |                                                                                                    |  |
| Edwards, N., M. Rowan, P. Marck, and D. Grinspun. 2011                                          | 2011 | Canada    | RA |  |  | "Blockages" in the system e.g., power relationships, or unintentional blockages to innovation                                                  | Through the use of "leverage point" strategies such as structures by which to organise the system | Identified leverage points and blockages in macro- and micro-levels based on the literature review |  |
| Ehrlich C, Kendall E. 2015                                                                      | 2015 | Australia | EM |  |  | Participants identified that, should funding cease, the program would not be sustained. This was attributed to limitations in program planning |                                                                                                   |                                                                                                    |  |
| Ellner, A. L., S. Stout, E. E. Sullivan, E. P. Griffiths, A. Mountjoy, and R. S. Phillips. 2015 | 2015 | Worldwide | ED |  |  | Recognises a lack of traditional metrics to measure health system improvement or sustainability                                                |                                                                                                   |                                                                                                    |  |

|                                                       |      |                          |    |                                               |  |                                                                                                                                                                                                                                                                                                                                              |                                                                                                                                                                                                                                                                                                                           |  |  |
|-------------------------------------------------------|------|--------------------------|----|-----------------------------------------------|--|----------------------------------------------------------------------------------------------------------------------------------------------------------------------------------------------------------------------------------------------------------------------------------------------------------------------------------------------|---------------------------------------------------------------------------------------------------------------------------------------------------------------------------------------------------------------------------------------------------------------------------------------------------------------------------|--|--|
| Farmanov a E,<br>Kirvan C,<br>Verma J,<br>et al. 2016 | 2016 | Canada                   | EM |                                               |  | Lack of leadership support, difficulty creating partnerships, communicating with and engaging with staff and physicians, struggling with funding models that perpetuate working in silos, insufficient time and resources, difficulty obtaining data, data management and measurement, scoping improvement projects, ensuring sustainability | Start small, but think big; work toward incremental development; select a portfolio of projects that are manageable and align with Triple aim dimensions; include partners at the outset; strategize and build multidisciplinary teams and leverage existing capabilities; do not make assumptions about patients/clients |  |  |
| Fineberg HV. 2012                                     | 2012 | United States of America | ED | Affordability (for individuals, organisation) |  |                                                                                                                                                                                                                                                                                                                                              | Increased use of IT, re-doubling the efforts to enhance quality                                                                                                                                                                                                                                                           |  |  |

1  
2  
3  
4  
5  
6  
7  
8  
9  
10  
11  
12  
13  
14  
15  
16  
17  
18  
19  
20  
21  
22  
23  
24  
25  
26  
27  
28  
29  
30  
31  
32  
33  
34  
35  
36  
37  
38  
39  
40  
41  
42  
43  
44  
45  
46  
47

|                                                                         |      |          |    |                                                                            |                                                                                  |  |                                                                                                                                                                                                                                                                                                                                                |  |  |
|-------------------------------------------------------------------------|------|----------|----|----------------------------------------------------------------------------|----------------------------------------------------------------------------------|--|------------------------------------------------------------------------------------------------------------------------------------------------------------------------------------------------------------------------------------------------------------------------------------------------------------------------------------------------|--|--|
|                                                                         |      |          |    | s and the government), acceptability to key constituents, and adaptability |                                                                                  |  | and safety in medical care, improving health care of high-need patients in a way that prevents hospitalisations, honour patient preferences, rely on systems engineering and operations research to smooth the patient journey through the health system, learn from peers and from evidence, and champion a system that values accountability |  |  |
| Foo, C. Y., K. K. Lim, S. Sivasambu, K. B. Dahian, and P. P. Goh. 2015. | 2015 | Malaysia | EM |                                                                            | Measurement using data envelopment analysis (DEA) overtime to measure efficiency |  |                                                                                                                                                                                                                                                                                                                                                |  |  |

|                                                               |      |                          |    |                                                                                                                                                                                                                          |                                                                                                                                                            |                                                                                                                                                                                                    |                                                     |  |  |
|---------------------------------------------------------------|------|--------------------------|----|--------------------------------------------------------------------------------------------------------------------------------------------------------------------------------------------------------------------------|------------------------------------------------------------------------------------------------------------------------------------------------------------|----------------------------------------------------------------------------------------------------------------------------------------------------------------------------------------------------|-----------------------------------------------------|--|--|
| Fox, L. A., K. E. Walsh, and E. G. Schainker. 2016            | 2016 | United States of America | EM |                                                                                                                                                                                                                          | Measured group sustainability through staff turnover rate                                                                                                  |                                                                                                                                                                                                    |                                                     |  |  |
| Garde S, Hullin CM, Chen R, et al. 2007                       | 2007 | Worldwide                | RA | Argues that linking the health system sustainability and health information systems is important, but recognises that there is no suitable and all-encompassing definition of sustainability in relation to health care. | There is a lack of qualitative indicators for sustainability. Suggestions of measuring sustainability by the eMergy (embodied energy) sustainability index | There are technological (e.g., making programs that can be flexible and adapt to context changes), socio-political and organizational (e.g., needing drivers behind interventions) issues/barriers |                                                     |  |  |
| Global, regional, and national disability-adjusted life-years | 2017 | Worldwide                | EM |                                                                                                                                                                                                                          | Used information previously gathered to make decisions regarding                                                                                           |                                                                                                                                                                                                    | Formulation of sustainable development goals (SDGs) |  |  |



1  
2  
3  
4  
5  
6  
7  
8  
9  
10  
11  
12  
13  
14  
15  
16  
17  
18  
19  
20  
21  
22  
23  
24  
25  
26  
27  
28  
29  
30  
31  
32  
33  
34  
35  
36  
37  
38  
39  
40  
41  
42  
43  
44  
45  
46  
47

|                                                                                   |      |                |    |                                                                                        |                                                                                                                             |  |                                                                                                                                      |                                                                                                                                                                                                                        |  |
|-----------------------------------------------------------------------------------|------|----------------|----|----------------------------------------------------------------------------------------|-----------------------------------------------------------------------------------------------------------------------------|--|--------------------------------------------------------------------------------------------------------------------------------------|------------------------------------------------------------------------------------------------------------------------------------------------------------------------------------------------------------------------|--|
| (DALYs) 2017                                                                      |      |                |    |                                                                                        | healthy life expectancy and risk-adjusted life expectancy                                                                   |  |                                                                                                                                      |                                                                                                                                                                                                                        |  |
| Greenhalgh, T., F. Macfarlane, C. Barton-Sweeney, and F. Woodard. 2012            | 2012 | United Kingdom | ED |                                                                                        | Case study: three-year follow-up of a health care program in London that underwent changes in terms of policy and economics |  | Some services changed over the three years and were altered relating to changes that happened with time e.g. national policy changes | Some interventions were sustained but looked different to the original intervention, due to it being adapted through the three years                                                                                   |  |
| Gruen RL, Elliott JH, Nolan ML, Lawton PD, Parkhill A, McLaren CJ, Lavis JN. 2008 | 2008 | Worldwide      | RA | Sustainability after an initial implementation period when funding ceases is difficult |                                                                                                                             |  |                                                                                                                                      | Targets of interventions to improve sustainability included the individual (e.g. through education), organisation (e.g., changes to policy), community (e.g., social actions) and system levels (e.g. social advocacy) |  |

|                                                                                                                                              |                                               |      |               |    |  |  |                                                                                                                                                                                                           |                                                                                                                                                                                    |  |  |
|----------------------------------------------------------------------------------------------------------------------------------------------|-----------------------------------------------|------|---------------|----|--|--|-----------------------------------------------------------------------------------------------------------------------------------------------------------------------------------------------------------|------------------------------------------------------------------------------------------------------------------------------------------------------------------------------------|--|--|
| 1<br>2<br>3<br>4<br>5<br>6<br>7<br>8<br>9<br>10<br>11<br>12<br>13<br>14<br>15<br>16                                                          | Guyon A, Hancock T, Kirk M, et al. 2017       | 2017 | Canada        | ED |  |  |                                                                                                                                                                                                           | Recognising the importance of governments and the health system providing fund and support for public health, as it delivers important information for the health system to thrive |  |  |
| 17<br>18<br>19<br>20<br>21<br>22<br>23                                                                                                       | Heron, N. 2015                                | 2015 | North Ireland | EM |  |  |                                                                                                                                                                                                           | Measure the effect of an intervention for management of musculoskeletal complaints in GP                                                                                           |  |  |
| 24<br>25<br>26<br>27<br>28<br>29<br>30<br>31<br>32<br>33<br>34<br>35<br>36<br>37<br>38<br>39<br>40<br>41<br>42<br>43<br>44<br>45<br>46<br>47 | Hibbert PD, Thomas MJW, Deakin A, et al. 2018 | 2018 | Australia     | EM |  |  | When there is an adverse event (AE) resulting in a root cause analysis (RCA), there are barely ever (5% of the time) provided strong recommendations for altering and improving the health system. 86% of | Observations and patient and carer interviews and review of notes may be useful in gaining a better understanding of adverse event situations                                      |  |  |

1  
2  
3  
4  
5  
6  
7  
8  
9  
10  
11  
12  
13  
14  
15  
16  
17  
18  
19  
20  
21  
22  
23  
24  
25  
26  
27  
28  
29  
30  
31  
32  
33  
34  
35  
36  
37  
38  
39  
40  
41  
42  
43  
44  
45  
46  
47

|                                              |      |                                    |    |                                                                                                  |                                                                          |                                            |                                                                                                                                                                                                                    |                                                                                                                                                                     |  |
|----------------------------------------------|------|------------------------------------|----|--------------------------------------------------------------------------------------------------|--------------------------------------------------------------------------|--------------------------------------------|--------------------------------------------------------------------------------------------------------------------------------------------------------------------------------------------------------------------|---------------------------------------------------------------------------------------------------------------------------------------------------------------------|--|
|                                              |      |                                    |    |                                                                                                  |                                                                          | the recommendations were considered 'weak' |                                                                                                                                                                                                                    |                                                                                                                                                                     |  |
| Hovenga EJ. 2013                             | 2013 | Worldwide                          | ED | Where everyone can access safe and correct health services to achieve the best outcomes possible |                                                                          |                                            | Four main outcomes or goals: improved health, responsiveness, financial risk protection, and improved efficiency                                                                                                   | Information technology (IT) has a role to play in creating sustainable health systems (as it can lead to decisions having better clinical outcomes and lower costs) |  |
| Inotai A, Petrova G, Vitezic D, Kalo Z. 2014 | 2014 | Central-Eastern European Countries | ED | Focus on financial sustainability                                                                | Measure the potential innovation by new drugs in terms of monetary value |                                            | Goal of innovative pharmaceutical companies is to provide health gain, equity in health, responsiveness of patients with complex comorbidities. To create this financial sustainability, affordable new innovative |                                                                                                                                                                     |  |

|                             |      |                          |    |                                                                                                                |                                                              |                                                                                                                                     |                                                                                                                                       |  |  |
|-----------------------------|------|--------------------------|----|----------------------------------------------------------------------------------------------------------------|--------------------------------------------------------------|-------------------------------------------------------------------------------------------------------------------------------------|---------------------------------------------------------------------------------------------------------------------------------------|--|--|
|                             |      |                          |    |                                                                                                                |                                                              |                                                                                                                                     | treatments and political sustainability are necessary                                                                                 |  |  |
| Kepros JP, Opreanu RC. 2009 | 2009 | United States of America | ED |                                                                                                                | Measuring the financial and social output of an organisation |                                                                                                                                     | Requires optimal relationships and synergy between the hospital, medical school and physicians, each with their own core competencies |  |  |
| Kerr R, Hendrie DV. 2018    | 2018 | Australia                | EM | Two meanings: 1) financial sustainability for governments and health services; 2) environmental sustainability |                                                              | To effectively fund patient access to hospital care in a system where capital allocation is not funded based on patient-centredness |                                                                                                                                       |  |  |
| Knutson, D. J. 1997         | 1997 | United States of America | ED |                                                                                                                | The issue of measurement after the funding period terminate  | Limitations in current models of chronic illness management, and the difference between thinking about                              | Recognises important components of models for critical care: should be patient centred, have a critical illness management            |  |  |

1  
2  
3  
4  
5  
6  
7  
8  
9  
10  
11  
12  
13  
14  
15  
16  
17  
18  
19  
20  
21  
22  
23  
24  
25  
26  
27  
28  
29  
30  
31  
32  
33  
34  
35  
36  
37  
38  
39  
40  
41  
42  
43  
44  
45  
46  
47

|                                             |      |           |    |  |                                                                                                                                          |                                                     |                                                                                                                                                                                                                                                                                            |                                                                                                                                    |  |
|---------------------------------------------|------|-----------|----|--|------------------------------------------------------------------------------------------------------------------------------------------|-----------------------------------------------------|--------------------------------------------------------------------------------------------------------------------------------------------------------------------------------------------------------------------------------------------------------------------------------------------|------------------------------------------------------------------------------------------------------------------------------------|--|
|                                             |      |           |    |  |                                                                                                                                          | and the reality of how clinical work occurs         | model, be conscious of minimising patient out-of-pocket expenses, consulting with the organisation, and recognising the link between clinical and research outcomes                                                                                                                        |                                                                                                                                    |  |
| Lega, F., Prenestini, A., Spurgeon, P. 2013 | 2013 | Worldwide | RA |  | Thirty-seven studies in a systematic review (both qualitative and quantitative were involved, and some had causal relationship analysis) | Rising costs, economic crises and ageing population | Recognise that the performance of health care organisations is correlated to management practices, leadership, engagement with professionals, management characteristics (e.g., training [doctors as managers are beneficial], background, career history), and organisational culture and | Medical engagement is linked to better patient mortality rates, decreased serious incidents, maintains high levels of patient care |  |

|                                                                  |      |                          |    |                                                                                                    |                                                                                                                                                                              |  |                                                                                                                                                                                                                          |  |  |
|------------------------------------------------------------------|------|--------------------------|----|----------------------------------------------------------------------------------------------------|------------------------------------------------------------------------------------------------------------------------------------------------------------------------------|--|--------------------------------------------------------------------------------------------------------------------------------------------------------------------------------------------------------------------------|--|--|
|                                                                  |      |                          |    |                                                                                                    |                                                                                                                                                                              |  | management status. New technologies are also useful                                                                                                                                                                      |  |  |
| Lehoux P, Williams-Jones B, Miller F, Urbach D, Tailliez S. 2008 | 2008 | Worldwide                | ED | Recognising the importance of being sustainable overtime, rather than creating for short-term gain |                                                                                                                                                                              |  |                                                                                                                                                                                                                          |  |  |
| L, Goeree R, Levine M, et al. 2011                               | 2011 | Canada                   | RA |                                                                                                    | When post-drug interventions are being used clinically, there should be field evaluation studies conducted to ensure the efficacy and cost effectiveness of the intervention |  | Coverage with evidence development (CED) is necessary, not to replace RCTs, but to gain the next level of knowledge about that intervention in clinical practice. It will also increase inter-disciplinary collaboration |  |  |
| Levine, S., S. O'Mahony                                          | 2017 | United States of America | EM |                                                                                                    |                                                                                                                                                                              |  | Interventions to improve palliative care                                                                                                                                                                                 |  |  |

1  
2  
3  
4  
5  
6  
7  
8  
9  
10  
11  
12  
13  
14  
15  
16  
17  
18  
19  
20  
21  
22  
23  
24  
25  
26  
27  
28  
29  
30  
31  
32  
33  
34  
35  
36  
37  
38  
39  
40  
41  
42  
43  
44  
45  
46  
47

|                                                                                                                         |      |               |    |  |  |                                                                                                     |                                                                                                                                                                                                                                                                |                                                                                                                                                                                                                                  |                                        |
|-------------------------------------------------------------------------------------------------------------------------|------|---------------|----|--|--|-----------------------------------------------------------------------------------------------------|----------------------------------------------------------------------------------------------------------------------------------------------------------------------------------------------------------------------------------------------------------------|----------------------------------------------------------------------------------------------------------------------------------------------------------------------------------------------------------------------------------|----------------------------------------|
| , A.<br>Baron, A.<br>Ansari, C.<br>Deamant,<br>J. Frader,<br>I. Leyva,<br>M.<br>Marschke,<br>and M.<br>Preodor.<br>2017 |      |               |    |  |  |                                                                                                     | (PC) in paediatric hospitals, and to improve physician self-care                                                                                                                                                                                               |                                                                                                                                                                                                                                  |                                        |
| Lewis S.<br>2007                                                                                                        | 2007 | Canada        | ED |  |  | Financial, ageing population, concern over the proportion of government spending used on healthcare | The challenge of learning from other countries, and recognising the context specific elements of the systems they have enforced, and appropriately contextualising to the Canadian context e.g., Europe pays doctors less than Canada, utilises more home care | Believes sustainability should not be the focus, but rather quality improvement, aligning incentives with goals, making excellence mandatory and reducing health disparities should be the goal for at least the next five years |                                        |
| Liaropoul<br>os L,<br>Goranitis<br>I. 2015                                                                              | 2015 | Worldwi<br>de | ED |  |  | Ageing population, the financial stress this places on healthcare                                   |                                                                                                                                                                                                                                                                |                                                                                                                                                                                                                                  | It was suggest ed that taxation should |

|                                                                                            |      |           |    |  |                                                                                  |                                                                                                                                                       |                                                                                                                                                                                                         |  |                                         |
|--------------------------------------------------------------------------------------------|------|-----------|----|--|----------------------------------------------------------------------------------|-------------------------------------------------------------------------------------------------------------------------------------------------------|---------------------------------------------------------------------------------------------------------------------------------------------------------------------------------------------------------|--|-----------------------------------------|
|                                                                                            |      |           |    |  |                                                                                  | systems, and the question of who is to pay for this increased cost? (e.g., does retirement age remain the same or rise?)                              |                                                                                                                                                                                                         |  | be a focus to contribute to health care |
| Lizarondo, L., C. Turnbull, T. Kroon, K. Grimmer, A. Bell, S. Kumar, M. McEvoy et al. 2016 | 2016 | Australia | EM |  | Using survey of Scott's 10 strategies for sustaining change in the health system |                                                                                                                                                       | Allied health respondents recognised that low- or no-impact interventions that cause little improvement or cause harm could be minimised, and by selecting care responses for comparative effectiveness |  |                                         |
| Lozano I, Rondan J, Vegas JM, Segovia E. 2016                                              | 2016 | Spain     | ED |  |                                                                                  | Funding and support for ongoing professional learning, recognising differences in health structures between countries to understand how recommendatio |                                                                                                                                                                                                         |  |                                         |



1  
2  
3  
4  
5  
6  
7  
8  
9  
10  
11  
12  
13  
14  
15  
16  
17  
18  
19  
20  
21  
22  
23  
24  
25  
26  
27  
28  
29  
30  
31  
32  
33  
34  
35  
36  
37  
38  
39  
40  
41  
42  
43  
44  
45  
46  
47

|                                           |      |                          |    |                                                                                                |  |                                                                                                                                                                                                                                                      |                                                                                                                                                                                                                                       |  |  |
|-------------------------------------------|------|--------------------------|----|------------------------------------------------------------------------------------------------|--|------------------------------------------------------------------------------------------------------------------------------------------------------------------------------------------------------------------------------------------------------|---------------------------------------------------------------------------------------------------------------------------------------------------------------------------------------------------------------------------------------|--|--|
|                                           |      |                          |    |                                                                                                |  | ns are transferrable                                                                                                                                                                                                                                 |                                                                                                                                                                                                                                       |  |  |
| Mackenzie J. 2011                         | 2011 | United Kingdom           | ED | Sustainable development meets the needs of the present whilst ensuring future needs can be met |  | The challenge of getting the balance between environmental, social and economic sustainability right, and considering how these factors interact                                                                                                     | Need to take a systems view of managing system risk, ensuring a more sustainable business system, and being strategic in the long term rather than focusing on short term gains                                                       |  |  |
| Magnan S, Fisher E, Kindig D, et al. 2012 | 2012 | United States of America | ED |                                                                                                |  | There are very few or no direct links between investing health care and establishing the social determinants of health, and there is little communication between stakeholders in these different camps. Rising health care costs are also a concern | The development of "health outcomes trust" organisations and accountable care organisations (ACOs) to work to fulfil the triple aim and have sustainable funding. Community goal-setting could also help to pay for population health |  |  |
| McGorry PD,                               | 2016 | Australia                | ED |                                                                                                |  | The challenges of                                                                                                                                                                                                                                    | E-health giving the opportunity                                                                                                                                                                                                       |  |  |

|                                                                          |      |                          |        |  |                                                |                                                                                                                                                                         |                                                                                                                                                |                                                                                         |  |
|--------------------------------------------------------------------------|------|--------------------------|--------|--|------------------------------------------------|-------------------------------------------------------------------------------------------------------------------------------------------------------------------------|------------------------------------------------------------------------------------------------------------------------------------------------|-----------------------------------------------------------------------------------------|--|
| Hamilton MP. 2016                                                        |      |                          |        |  |                                                | implementing effective mental health reforms, including allowing access to early intervention with government funding, and funding with the NDIS for more complex cases | for a complementary role at all stages of illness, and the importance of research and evaluation in creating the most cost-effective solutions |                                                                                         |  |
| McGrath, S. P., and G. T. Blike. 2015                                    | 2015 | United Kingdom           | EM     |  | Dartmouth-Hitchcock Value Institute Experience |                                                                                                                                                                         | The define-measure-analyse-improve-control framework was developed to allow a problem-solving approach to challenges                           | The last phase, 'control' promotes the changes to be sustained through time             |  |
| McIntosh E, Nagelkerk J, Vonderheid SC, Poole M, Dontje K, Pohl JM. 2003 | 2003 | United States of America | ED     |  |                                                | Recognition that nurse managed centres often do not receive the necessary financial support for their centres to be continued                                           | A financial advisory committee (FAC) could help improve financial outcomes in these centres                                                    | The FAC had meetings over three years and developed financial skills of the individuals |  |
| McVeigh J,                                                               | 2016 | Worldwide                | RA, EM |  |                                                |                                                                                                                                                                         |                                                                                                                                                | Participation of people with                                                            |  |

1  
2  
3  
4  
5  
6  
7  
8  
9  
10  
11  
12  
13  
14  
15  
16  
17  
18  
19  
20  
21  
22  
23  
24  
25  
26  
27  
28  
29  
30  
31  
32  
33  
34  
35  
36  
37  
38  
39  
40  
41  
42  
43  
44  
45  
46  
47

For peer review only

|                                          |      |                          |    |  |                                                                |                                                                           |  |                                                                                                                                                                                                                                                                                                                                                                                  |  |
|------------------------------------------|------|--------------------------|----|--|----------------------------------------------------------------|---------------------------------------------------------------------------|--|----------------------------------------------------------------------------------------------------------------------------------------------------------------------------------------------------------------------------------------------------------------------------------------------------------------------------------------------------------------------------------|--|
| MacLachlan M, Gilmore B, et al. 2016     |      |                          |    |  |                                                                |                                                                           |  | disabilities (service users) in policy development and the governance of that service to improve sustainability. Additionally, aligning or integrating new models of care with existing models can strengthen program delivery and implementation of policies for rehabilitation. Support from professionals in the field and stakeholders is also beneficial for sustainability |  |
| Molfenter, T., D. Gustafson, C. Kilo, A. | 2005 | United States of America | EM |  | Measure the self-reported and faculty-reported the success and | The model used was not able to predict sustainability of interventions or |  |                                                                                                                                                                                                                                                                                                                                                                                  |  |

|                                    |      |        |    |  |                                             |                                                                                       |                                                                                                                                                                                                                                                                                                                                                                                    |  |  |
|------------------------------------|------|--------|----|--|---------------------------------------------|---------------------------------------------------------------------------------------|------------------------------------------------------------------------------------------------------------------------------------------------------------------------------------------------------------------------------------------------------------------------------------------------------------------------------------------------------------------------------------|--|--|
| Bhattacharya, and J. Olsson. 2005. |      |        |    |  | sustenance of changes to their organisation | programs, but this may be due to the time period or the sustainability of the measure |                                                                                                                                                                                                                                                                                                                                                                                    |  |  |
| Nagle LM, Pitts BM. 2012           | 2012 | Canada | ED |  |                                             |                                                                                       | Recommendations: raise public awareness of services available, improve access to primary health care, empower patients about their care, use incentives to encourage serving in under-served areas, create an integrated health record service, devise alternatives to the fee-for-service model, increase funding for community services, give health professionals communication |  |  |

1  
2  
3  
4  
5  
6  
7  
8  
9  
10  
11  
12  
13  
14  
15  
16  
17  
18  
19  
20  
21  
22  
23  
24  
25  
26  
27  
28  
29  
30  
31  
32  
33  
34  
35  
36  
37  
38  
39  
40  
41  
42  
43  
44  
45  
46  
47

|                                                       |      |           |    |  |                                                                                                                                                                                                                                        |                                                                                                                   |                                                                                                                                                                    |  |  |
|-------------------------------------------------------|------|-----------|----|--|----------------------------------------------------------------------------------------------------------------------------------------------------------------------------------------------------------------------------------------|-------------------------------------------------------------------------------------------------------------------|--------------------------------------------------------------------------------------------------------------------------------------------------------------------|--|--|
|                                                       |      |           |    |  |                                                                                                                                                                                                                                        |                                                                                                                   | and language training, emphasise healthy lifestyles, ensure pharmaceuticals are affordable, decrease wait time and increase access for services for mental illness |  |  |
| Pacifico Silva H, Lehoux P, Miller FA, Denis JL. 2018 | 2018 | Worldwide | ED |  | Development of the responsible innovations for health (RIH) framework which identifies interventions that respond to the context and support equitable and sustainable health service. It includes 5 domains: 1. population health; 2. | Ensuring Responsible Innovations in Health (RIH), involving consideration of sustainability and equity challenges |                                                                                                                                                                    |  |  |

|                                      |      |                          |    |  |                                                                                                           |                                                                                                                                                                                                                                                                                     |                                                                                                                                                                                                      |  |  |
|--------------------------------------|------|--------------------------|----|--|-----------------------------------------------------------------------------------------------------------|-------------------------------------------------------------------------------------------------------------------------------------------------------------------------------------------------------------------------------------------------------------------------------------|------------------------------------------------------------------------------------------------------------------------------------------------------------------------------------------------------|--|--|
|                                      |      |                          |    |  | health system; 3. Economic; 4. organisational; and 5. environmental                                       |                                                                                                                                                                                                                                                                                     |                                                                                                                                                                                                      |  |  |
| Pencheon D. 2013                     | 2013 | England                  | ED |  | Measuring preventable illness and unplanned hospital admissions as system failures until proven otherwise | Understanding the changing needs (demographic, social, cultural) of the changing population; understanding how the rapid growth of science and technology can change outcomes; the need for public services to act within environmental boundaries and increased levels of scrutiny | Utilising technology to promote sustainable and personalised health care, and improving the prevention of illness rather than treating the illness once it arises e.g., increasing physical activity |  |  |
| Peric, N., M. M. Hofmarcher-Holzhack | 2017 | European Union Countries | RA |  | Does not answer how we measure sustainability but the                                                     |                                                                                                                                                                                                                                                                                     |                                                                                                                                                                                                      |  |  |

1  
2  
3  
4  
5  
6  
7  
8  
9  
10  
11  
12  
13  
14  
15  
16  
17  
18  
19  
20  
21  
22  
23  
24  
25  
26  
27  
28  
29  
30  
31  
32  
33  
34  
35  
36  
37  
38  
39  
40  
41  
42  
43  
44  
45  
46  
47

|                                                                                                                                         |      |                                                     |    |                                                                                |                                                                                                                  |  |                                                                                   |  |  |
|-----------------------------------------------------------------------------------------------------------------------------------------|------|-----------------------------------------------------|----|--------------------------------------------------------------------------------|------------------------------------------------------------------------------------------------------------------|--|-----------------------------------------------------------------------------------|--|--|
| er, and J. Simon. 2017.                                                                                                                 |      |                                                     |    |                                                                                | methods or 'actors and actions' by which sustainable health system performance is assessed                       |  |                                                                                   |  |  |
| Pronovost, P. J., C. G. Holzmueller, T. Callender, R. Demski, L. Winner, R. Day, J. M. Austin, S. M. Berenholtz, and M. R. Miller. 2016 | 2016 | United States of America                            | ED |                                                                                | Measuring performance of the Johns Hopkins Hospital (JHH) over a number of years compared to national guidelines |  | Phase 3 of the program involved a peer education program for health professionals |  |  |
| Rees, G. H. 2014.                                                                                                                       | 2014 | United States of America, United Kingdom, Australia | EM | "Implementation to effect continuous improvement, by either setting a cycle or |                                                                                                                  |  |                                                                                   |  |  |

|                                        |      |                          |    |                                                                                    |                                                                                                                                                |                                                                                                                                                                      |  |                                                                                                                                                                                |  |
|----------------------------------------|------|--------------------------|----|------------------------------------------------------------------------------------|------------------------------------------------------------------------------------------------------------------------------------------------|----------------------------------------------------------------------------------------------------------------------------------------------------------------------|--|--------------------------------------------------------------------------------------------------------------------------------------------------------------------------------|--|
|                                        |      |                          |    | programming for the next unit on the patient journey to undertake Lean activities” |                                                                                                                                                |                                                                                                                                                                      |  |                                                                                                                                                                                |  |
| Robertson J, Walkom EJ, Henry DA. 2011 | 2011 | Australia                | EM |                                                                                    | Surveyed both GPs, specialists, and consumers (patients) in the health system, and asked them to identify the potential problems in the system | Both doctors and consumers recognise the rising cost of health care, but doctors are less concerned than consumers regarding the sustainability of the health system |  |                                                                                                                                                                                |  |
| Robertson TM, Lofgren RP. 2015         | 2015 | United States of America | ED |                                                                                    |                                                                                                                                                | A large percentage (80%) of health spending is spent on a small proportion (20%) of the population due to complex episodes of care. The challenge is therefore to    |  | "The national health care agenda has been heavily influenced by the assumptions that disease prevention and the general promotion of “population health” will be sufficient to |  |



1  
2  
3  
4  
5  
6  
7  
8  
9  
10  
11  
12  
13  
14  
15  
16  
17  
18  
19  
20  
21  
22  
23  
24  
25  
26  
27  
28  
29  
30  
31  
32  
33  
34  
35  
36  
37  
38  
39  
40  
41  
42  
43  
44  
45  
46  
47

|                                                          |      |        |    |                                                                                                                                                                                                             |  |                                                                                                                                                                                                                                                                  |                                                            |                                                      |  |
|----------------------------------------------------------|------|--------|----|-------------------------------------------------------------------------------------------------------------------------------------------------------------------------------------------------------------|--|------------------------------------------------------------------------------------------------------------------------------------------------------------------------------------------------------------------------------------------------------------------|------------------------------------------------------------|------------------------------------------------------|--|
|                                                          |      |        |    |                                                                                                                                                                                                             |  | learn to address these in a more cost-effective manner, but this poses difficulties e.g., it is hard to decrease costs through conducting outpatient clinics                                                                                                     |                                                            | reduce health care spending to a sustainable level." |  |
| Rosenberg-Yunger ZR, Daar AS, Singer PA, Martin DK. 2008 | 2008 | Canada | ED | Sustainability of the health system "means ensuring that sufficient resources are available over the long term to provide timely access to quality services that address Canadians' evolving health needs." |  | The rising cost of pharmaceuticals and biopharmaceuticals, the complicated process by which drugs get approved for funding and use in developed countries, and the time consuming alternatives (e.g., the Special Access Program in Canada). This leads to moral | A mechanism to involve more stakeholders in the discussion |                                                      |  |

|                   |      |                          |    |                                                             |                                                                                   |                                                                                                                    |                                                                                                                                                |                                                                                                                                                                                                                                       |  |
|-------------------|------|--------------------------|----|-------------------------------------------------------------|-----------------------------------------------------------------------------------|--------------------------------------------------------------------------------------------------------------------|------------------------------------------------------------------------------------------------------------------------------------------------|---------------------------------------------------------------------------------------------------------------------------------------------------------------------------------------------------------------------------------------|--|
|                   |      |                          |    |                                                             |                                                                                   | questions about the legitimacy and fairness of applying for drugs, especially new and expensive biopharmaceuticals |                                                                                                                                                |                                                                                                                                                                                                                                       |  |
| Rosser, M. 2006   | 2006 | Canada                   | ED |                                                             |                                                                                   |                                                                                                                    | The Healthcare Materials Management Services (HMMS) created in 1997 and its success hinged on the collaboration between the hospitals involved | Sustaining change is thought to be attributed to: executive funding, leadership, collaboration, openness of providers to the process, support of front-line clinical leaders, and development of a unique entity with its own culture |  |
| Scheirer MA. 2005 | 2005 | United States of America | RA | Sustaining a program or initiative that had previously been | Sustainability can fall into 3 measures: 1. health benefits continue post-funding | Challenge of funding only for short periods (3-5 years) and the subsequent need to source                          |                                                                                                                                                | The authors suggest that the expectation that a new project will be sustainable after                                                                                                                                                 |  |

1  
2  
3  
4  
5  
6  
7  
8  
9  
10  
11  
12  
13  
14  
15  
16  
17  
18  
19  
20  
21  
22  
23  
24  
25  
26  
27  
28  
29  
30  
31  
32  
33  
34  
35  
36  
37  
38  
39  
40  
41  
42  
43  
44  
45  
46  
47

|                                                                                          |      |                          |    |                                                                                      |                                                                                                                                                                                                                                        |                                                                                                                                                            |                                                                                         |                                                                                                                             |  |
|------------------------------------------------------------------------------------------|------|--------------------------|----|--------------------------------------------------------------------------------------|----------------------------------------------------------------------------------------------------------------------------------------------------------------------------------------------------------------------------------------|------------------------------------------------------------------------------------------------------------------------------------------------------------|-----------------------------------------------------------------------------------------|-----------------------------------------------------------------------------------------------------------------------------|--|
|                                                                                          |      |                          |    | developed and maintained after the initial funding period or other impetus had ended | (individual level outcomes); 2. continuation of program activities post-intervention (organisation level outcomes); 3. relates to changes in community capacity to promote health post-intervention/funding (community level outcomes) | funding. Also challenging is the uniqueness of context, whereby each project is influenced by its context and what programs or activities have preceded it |                                                                                         | a 3 year funding project may be overly optimistic (therefore that it is hard to find funding opportunities after that time) |  |
| Schwann, N. M., K. A. Bretz, S. Eid, T. Burger, D. Fry, F. Ackler, P. Evans et al. 2011. | 2011 | United States of America | EM |                                                                                      |                                                                                                                                                                                                                                        |                                                                                                                                                            | Decrease hospital acquired infections through point-of-care electronic prompts (POCEPs) | Sustaining changes from an intervention over a two year period                                                              |  |
| Scott IA. 2006                                                                           | 2006 | Australia                | ED |                                                                                      |                                                                                                                                                                                                                                        | Baby boomers getting older with                                                                                                                            | Training patients with counselling and behavioural                                      | Abolishing state and federal boundaries in                                                                                  |  |

1  
2  
3  
4  
5  
6  
7  
8  
9  
10  
11  
12  
13  
14  
15  
16  
17  
18  
19  
20  
21  
22  
23  
24  
25  
26  
27  
28  
29  
30  
31  
32  
33  
34  
35  
36  
37  
38  
39  
40  
41  
42  
43  
44  
45  
46  
47

|                              |      |        |    |                                                                                                                                        |                                                                                                                                                  |                                                                                                                                                                                                                                                                                                 |                                                                                                                                                       |                                                                                                                                                                    |  |
|------------------------------|------|--------|----|----------------------------------------------------------------------------------------------------------------------------------------|--------------------------------------------------------------------------------------------------------------------------------------------------|-------------------------------------------------------------------------------------------------------------------------------------------------------------------------------------------------------------------------------------------------------------------------------------------------|-------------------------------------------------------------------------------------------------------------------------------------------------------|--------------------------------------------------------------------------------------------------------------------------------------------------------------------|--|
|                              |      |        |    |                                                                                                                                        |                                                                                                                                                  | comorbidities and decreased quality of life, the 'worried well', new technologies, the demand for new and further treatments, the influence of the media (e.g. "miracle cures"), juggling a finite health budget, threats of global warming, and deciding which treatments should be subsidised | strategies to take more control over their own care, encouraging non-traditional caregivers to do some forms of care if found to be equally effective | funding and creating a new federal system, having each patient with a GP responsible for their care, linking healthcare databases with a unique patient identifier |  |
| Sepehri A, Chernomas R. 2004 | 2004 | Canada | ED | Acknowledges that different fields have different definitions of sustainability, and that these definitions tend to focus on resources | Fiscal sustainability has been measured through the percentage of provincial and territorial budget allocation for health care, but this acts on | Threat to sustainability is the uncertainty of government funding                                                                                                                                                                                                                               |                                                                                                                                                       |                                                                                                                                                                    |  |

1  
2  
3  
4  
5  
6  
7  
8  
9  
10  
11  
12  
13  
14  
15  
16  
17  
18  
19  
20  
21  
22  
23  
24  
25  
26  
27  
28  
29  
30  
31  
32  
33  
34  
35  
36  
37  
38  
39  
40  
41  
42  
43  
44  
45  
46  
47

|                                                         |      |           |    |                                                                                                                                       |                                                                                                                                               |                                           |                                                                                                                                                       |  |  |
|---------------------------------------------------------|------|-----------|----|---------------------------------------------------------------------------------------------------------------------------------------|-----------------------------------------------------------------------------------------------------------------------------------------------|-------------------------------------------|-------------------------------------------------------------------------------------------------------------------------------------------------------|--|--|
|                                                         |      |           |    | and the capacity of the public sector to finance current and future health expenditure                                                | two assumptions. 1) providers are assumed to respond to needs, and 2) the needs are assumed to reflect the current state of medical knowledge |                                           |                                                                                                                                                       |  |  |
| Shaw J, Wong I, Griffin B, Robertson M, Bhatia RS. 2017 | 2017 | Canada    | EM |                                                                                                                                       |                                                                                                                                               | "Increasingly complex patient population" | Emphasis must be placed on sustainability in order to protect the universal public healthcare system. "Need for comprehensive health system planning" |  |  |
| Shigayeva A, Coker RJ. 2015                             | 2015 | Worldwide | ED | Sustainability is the system's resilience. In a public health perspective, sustainability is defined in relation to if the benefit to | Several frameworks have been suggested, which measure determinants or dimensions of sustainability. They mostly do not                        |                                           | Five programmatic components in disease control programs that are important for sustainability: leadership, capacity, interactions (notions of        |  |  |

|                                                                                        |      |                          |    |                                                                                                                         |                                                                                                                                                                                              |                                                                         |                                                         |  |  |
|----------------------------------------------------------------------------------------|------|--------------------------|----|-------------------------------------------------------------------------------------------------------------------------|----------------------------------------------------------------------------------------------------------------------------------------------------------------------------------------------|-------------------------------------------------------------------------|---------------------------------------------------------|--|--|
|                                                                                        |      |                          |    | stakeholders is sustained overtime. Financial sustainability and being responsive to the consumer wishes also important | consider efficiency, which is an important component of sustainability. Underrepresented field: of 108 studies in systematic review, only two looked at HSPS (Lafond 1995a; Pammolli et al.) |                                                                         | integration), flexibility/adaptability and performance  |  |  |
| Solon, O., K. Woo, S. A. Quimbo, R. Shimkhada, J. Florentino, and J. W. Peabody. 2009. | 2009 | Phillipines              | EM |                                                                                                                         | Developed Q* to measure quality of hospital performance across a range of facilities                                                                                                         |                                                                         |                                                         |  |  |
| Sonnenreich P, Geisler L. 2016                                                         | 2016 | United States of America | ED |                                                                                                                         | Financial issues of rising healthcare costs and                                                                                                                                              | Financial unsustainability in the system, (e.g., that 30% of healthcare | The initiation of a value based formulary in pharmacies |  |  |

1  
2  
3  
4  
5  
6  
7  
8  
9  
10  
11  
12  
13  
14  
15  
16  
17  
18  
19  
20  
21  
22  
23  
24  
25  
26  
27  
28  
29  
30  
31  
32  
33  
34  
35  
36  
37  
38  
39  
40  
41  
42  
43  
44  
45  
46  
47

|                                                                                                     |      |                          |    |  |                            |                                                                                                                                                                                                                                                                                                    |                                                                                                                                                                    |                                                                                                                                      |  |
|-----------------------------------------------------------------------------------------------------|------|--------------------------|----|--|----------------------------|----------------------------------------------------------------------------------------------------------------------------------------------------------------------------------------------------------------------------------------------------------------------------------------------------|--------------------------------------------------------------------------------------------------------------------------------------------------------------------|--------------------------------------------------------------------------------------------------------------------------------------|--|
|                                                                                                     |      |                          |    |  | decreasing affordability   | spending is wasteful) and trying to balance this with allowing patients to access new expensive medicines. But a new way to look at it would be to analyse the <i>value</i> of the drug. There is also a problem with patient adherence to medications, especially when they have a higher expense |                                                                                                                                                                    |                                                                                                                                      |  |
| Stockdale, S. E., J. Zuchowski, L. V. Rubenstein, N. Sapir, E. M. Yano, L. Altman, J. J. Fickel, S. | 2018 | United States of America | EM |  | Through interview analysis | Barriers to sustained improvement included a lack of collaborative working between local practice leaders; another challenge is balancing time that could be                                                                                                                                       | Through the introduction of quality care councils and an evidence based quality-improvement project aimed at improving disciplinary leadership, aligning frontline | Assessed project completion and spread and found it was important to have mechanisms by which to hold frontline innovations would be |  |

|                                                                                                                                                                                                                            |                                                    |      |             |    |  |                                                                                                                                                                                                                                                                                                                     |                                                                                                                                                                                                                                                                                                                                                                                                |                                                                |  |
|----------------------------------------------------------------------------------------------------------------------------------------------------------------------------------------------------------------------------|----------------------------------------------------|------|-------------|----|--|---------------------------------------------------------------------------------------------------------------------------------------------------------------------------------------------------------------------------------------------------------------------------------------------------------------------|------------------------------------------------------------------------------------------------------------------------------------------------------------------------------------------------------------------------------------------------------------------------------------------------------------------------------------------------------------------------------------------------|----------------------------------------------------------------|--|
| 1<br>2<br>3<br>4<br>5<br>6<br>7<br>8<br>9<br>10                                                                                                                                                                            | McDougal, T. Dresselhaus, and A. B. Hamilton. 2016 |      |             |    |  | spent on patients to be attributed to the 'extra work' of the project                                                                                                                                                                                                                                               | improvement innovation and assessing implementation designs                                                                                                                                                                                                                                                                                                                                    | suitable for spread (but does not research the impact of this) |  |
| 11<br>12<br>13<br>14<br>15<br>16<br>17<br>18<br>19<br>20<br>21<br>22<br>23<br>24<br>25<br>26<br>27<br>28<br>29<br>30<br>31<br>32<br>33<br>34<br>35<br>36<br>37<br>38<br>39<br>40<br>41<br>42<br>43<br>44<br>45<br>46<br>47 | Stoelwinder JU, Paolucci F. 2009                   | 2009 | Netherlands | ED |  | Growth rate of the Australian health system is financially unsustainable, with the Australian Medical Association, as well as state governments, lobbying for more funding. It is also likely that there will be significant resistance by stakeholders when there is suggestion of Australian health system reform | Being inspired by the Netherlands new system of health reform, including policy objectives of durability (sustainability), solidarity (equity), choice, quality and efficiency. Additionally, there are tools to keep citizens engaged in their health care decisions, including the choice of 15 health insurance providers. To avoid insurers seeking out low-risk clients, there has been a |                                                                |  |



1  
2  
3  
4  
5  
6  
7  
8  
9  
10  
11  
12  
13  
14  
15  
16  
17  
18  
19  
20  
21  
22  
23  
24  
25  
26  
27  
28  
29  
30  
31  
32  
33  
34  
35  
36  
37  
38  
39  
40  
41  
42  
43  
44  
45  
46  
47

|                         |      |           |    |  |                                                                                |                                                                                                                                                                                                                                      |                                                                                                                                                                                                                                                                                                                  |  |  |
|-------------------------|------|-----------|----|--|--------------------------------------------------------------------------------|--------------------------------------------------------------------------------------------------------------------------------------------------------------------------------------------------------------------------------------|------------------------------------------------------------------------------------------------------------------------------------------------------------------------------------------------------------------------------------------------------------------------------------------------------------------|--|--|
|                         |      |           |    |  |                                                                                |                                                                                                                                                                                                                                      | complex risk-equalisation scheme put in place                                                                                                                                                                                                                                                                    |  |  |
| Stoelwind er JU. 2009   | 2009 | Australia | ED |  |                                                                                | The need to address both financial and political sustainability in the health system (e.g., with rising health care costs, and the political structures to deal with tax payment rather than consumer payment for the health system) | Governance needs to be established for the "healthy Australia accord", the federal government should progressively take over funding responsibilities for Medicare, and a funding model called "Medicare select" should be established whereby public and private health models compete to allow consumer choice |  |  |
| Stuart N, Adams J. 2007 | 2007 | Canada    | ED |  | Cost of health care that outpaces economic growth, and a way of conceptualisin | Spending on healthcare is being pushed to unsustainable levels meaning that, in order to be sustained,                                                                                                                               |                                                                                                                                                                                                                                                                                                                  |  |  |

|                   |      |                          |    |                                                                                                             |                                                                                                                                                                        |                                                                                                                                    |                                                                                                                                              |  |  |
|-------------------|------|--------------------------|----|-------------------------------------------------------------------------------------------------------------|------------------------------------------------------------------------------------------------------------------------------------------------------------------------|------------------------------------------------------------------------------------------------------------------------------------|----------------------------------------------------------------------------------------------------------------------------------------------|--|--|
|                   |      |                          |    |                                                                                                             | g this is in a comparison to Maslow's hierarchy of needs, with different levels of health need (but this adds to questions of how health need and benefit are defined) | spending must be taken away from other areas e.g., education, infrastructure; or increase revenue; or decrease cost of health care |                                                                                                                                              |  |  |
| Taylor M. 2007    | 2007 | Australia                | ED |                                                                                                             |                                                                                                                                                                        |                                                                                                                                    | The expansion and development of the role of nurse practitioners (NPs) e.g. by improving access to health care in remote and rural Australia |  |  |
| Thompson RE. 1998 | 1998 | United States of America | ED | Sustainability defined as meeting the needs of the present whilst guarding resources for future generations |                                                                                                                                                                        | Financial and moral factors that influence physician decisions, which have ultimately been influenced by politics and laws         | "Managed care" needs to mature and evolve through supporting teaching, research, patient care and care for their staff                       |  |  |

1  
2  
3  
4  
5  
6  
7  
8  
9  
10  
11  
12  
13  
14  
15  
16  
17  
18  
19  
20  
21  
22  
23  
24  
25  
26  
27  
28  
29  
30  
31  
32  
33  
34  
35  
36  
37  
38  
39  
40  
41  
42  
43  
44  
45  
46  
47

|                                                                                                                                              |      |        |    |  |                                                                                                                                                               |  |                                                                                                                                                                                                                                    |                                                                                                                                    |  |
|----------------------------------------------------------------------------------------------------------------------------------------------|------|--------|----|--|---------------------------------------------------------------------------------------------------------------------------------------------------------------|--|------------------------------------------------------------------------------------------------------------------------------------------------------------------------------------------------------------------------------------|------------------------------------------------------------------------------------------------------------------------------------|--|
| Tricco, A. C., H. M. Ashoor, R. Cardoso, H. MacDonald, E. Cogo, M. Kastner, L. Perrier, A. McKibbon, J. M. Grimshaw, and S. E. Straus. 2016. | 2016 | Canada | RA |  | Scoping review to see what knowledge could be gained from studies aiming to use knowledge translation to improve health of patients managing chronic diseases |  |                                                                                                                                                                                                                                    | Specifically examined articles that had follow-up one or more years after the initial test, or continued beyond the funding period |  |
| Tsasis P. 2009                                                                                                                               | 2009 | Canada | ED |  |                                                                                                                                                               |  | The potential of improving access to home care for older patients with one or more chronic illnesses, through improving funding for these programs. Additionally, interdisciplinary teamwork and having a patient-centred approach |                                                                                                                                    |  |

1  
2  
3  
4  
5  
6  
7  
8  
9  
10  
11  
12  
13  
14  
15  
16  
17  
18  
19  
20  
21  
22  
23  
24  
25  
26  
27  
28  
29  
30  
31  
32  
33  
34  
35  
36  
37  
38  
39  
40  
41  
42  
43  
44  
45  
46  
47

|                                                |      |           |    |  |  |                                                                                                                                                                                                                                                                                                      |                                                                                                                                            |                                                                                                                                                                                                                                                                                                                             |  |
|------------------------------------------------|------|-----------|----|--|--|------------------------------------------------------------------------------------------------------------------------------------------------------------------------------------------------------------------------------------------------------------------------------------------------------|--------------------------------------------------------------------------------------------------------------------------------------------|-----------------------------------------------------------------------------------------------------------------------------------------------------------------------------------------------------------------------------------------------------------------------------------------------------------------------------|--|
|                                                |      |           |    |  |  |                                                                                                                                                                                                                                                                                                      | to care has the potential to improve health system sustainability by minimising drug interactions and conflicting advice given to patients |                                                                                                                                                                                                                                                                                                                             |  |
| Van de Pas R, Hill PS, Hammonds R, et al. 2017 | 2017 | Worldwide | ED |  |  | The current sustainable development goals (SDGs) are superficial, and more political debate on structure, policy and agency are needed to bridge the gap and overcome existing health injustices. Also noted that many of the SDGs, although not specifically health related, have impacts on health |                                                                                                                                            | Stewardship embodying the establishment of norms, values and rules to guide policy development and advocacy for global health across sectors. Also recognised as important is the production of global public goods, the mobilization of global solidarity and the management of externalities e.g., governments, states or |  |

1  
2  
3  
4  
5  
6  
7  
8  
9  
10  
11  
12  
13  
14  
15  
16  
17  
18  
19  
20  
21  
22  
23  
24  
25  
26  
27  
28  
29  
30  
31  
32  
33  
34  
35  
36  
37  
38  
39  
40  
41  
42  
43  
44  
45  
46  
47

|                                |      |           |    |  |  |                                                                                                                                                                                                                                                                                                                                                                     |                                                                |                      |  |
|--------------------------------|------|-----------|----|--|--|---------------------------------------------------------------------------------------------------------------------------------------------------------------------------------------------------------------------------------------------------------------------------------------------------------------------------------------------------------------------|----------------------------------------------------------------|----------------------|--|
|                                |      |           |    |  |  |                                                                                                                                                                                                                                                                                                                                                                     |                                                                | transnational bodies |  |
| Veillard J, Denny K. 2014      | 2014 | Canada    | ED |  |  | The majority of health care spending is on a small proportion of patients                                                                                                                                                                                                                                                                                           | Need for more consistency in practice and delivery methods     |                      |  |
| Wakerman J, Humphreys JS. 2011 | 2011 | Australia | RA |  |  | Addressing rural and remote areas in Australia. These areas are known for their deficits e.g., high morbidity and mortality, workplace shortages, lack of services and high cost of care delivery. Systems need to realise there is no one-size-fits-all solution, and changes need to align the on the micro-scale health service level as well as the macro-scale | A systematic approach is needed to improve primary health care |                      |  |

|                                |      |           |    |  |  |                                                                                                                                                                                                                |                                                                                                                                                                                                                                                                                                                                                                                                                                                          |  |  |
|--------------------------------|------|-----------|----|--|--|----------------------------------------------------------------------------------------------------------------------------------------------------------------------------------------------------------------|----------------------------------------------------------------------------------------------------------------------------------------------------------------------------------------------------------------------------------------------------------------------------------------------------------------------------------------------------------------------------------------------------------------------------------------------------------|--|--|
|                                |      |           |    |  |  | external policy environment                                                                                                                                                                                    |                                                                                                                                                                                                                                                                                                                                                                                                                                                          |  |  |
| Wakerman J, Humphreys JS. 2013 | 2013 | Australia | ED |  |  | Tension between national health workforce policy initiatives and demographic, socioeconomic and political forces. Overall, health care service access and the health status is worse in non-metropolitan areas | The aim is to provide accessible, affordable, appropriate health care regardless of geography. Potential improvement in the number of doctors in regional and rural areas if there is a change in the culture of thinking of rural areas as negative, and through the increased number of medical students being trained appropriately for regional and remote work, and addressing the other workforces that collaborate with the rural services (e.g., |  |  |

1  
2  
3  
4  
5  
6  
7  
8  
9  
10  
11  
12  
13  
14  
15  
16  
17  
18  
19  
20  
21  
22  
23  
24  
25  
26  
27  
28  
29  
30  
31  
32  
33  
34  
35  
36  
37  
38  
39  
40  
41  
42  
43  
44  
45  
46  
47

|                                                               |      |                           |    |  |  |                                                          |                                                                                                                                             |                                                                                                                                                                                                        |  |
|---------------------------------------------------------------|------|---------------------------|----|--|--|----------------------------------------------------------|---------------------------------------------------------------------------------------------------------------------------------------------|--------------------------------------------------------------------------------------------------------------------------------------------------------------------------------------------------------|--|
|                                                               |      |                           |    |  |  |                                                          | funding, infrastructure, governance), and increasing the accountability of the health service through agreed indicators and output measures |                                                                                                                                                                                                        |  |
| Woodward, G. L., A. Iverson, R. Harvey, and P. G. Blake. 2015 | 2015 | Canada                    | ED |  |  | Recognises the challenge of bridging policy and practice |                                                                                                                                             | Requires leadership, transparency, accountability and communication                                                                                                                                    |  |
| Wutzke, S., M. Benton, and R. Verma. 2016                     | 2016 | Australia and New Zealand | EM |  |  |                                                          |                                                                                                                                             | Four general factors were found to be present in successful interventions: 1. having a sound business case for change; 2. being prepared for the change process and adapting to different contexts; 3. |  |

|                                              |      |           |    |  |                                     |                                                                       |                                                                                                                                                                                                |                                                                                               |  |
|----------------------------------------------|------|-----------|----|--|-------------------------------------|-----------------------------------------------------------------------|------------------------------------------------------------------------------------------------------------------------------------------------------------------------------------------------|-----------------------------------------------------------------------------------------------|--|
|                                              |      |           |    |  |                                     |                                                                       |                                                                                                                                                                                                | promoting change through stakeholders; 4. ensuring support through the implementation process |  |
| Zhao Y, Russell DJ, Guthridge S, et al. 2017 | 2017 | Australia | EM |  | Regression analyses of payroll data | Managing fluctuations in funding and the translation of this to staff |                                                                                                                                                                                                |                                                                                               |  |
| Pisco L, Pinto LF.. 2020                     | 2020 | Portugal  | ED |  |                                     | Comorbidity and increasing age                                        | Suggests that primary healthcare and preventive care (e.g., maternal health, disease prevention, vaccines etc.) is a strong investment to increase productivity and strengthen social cohesion |                                                                                               |  |
| Ganann R, Peacock S, Garnett A, et al. 2019. | 2019 | Canada    | ED |  |                                     | Discusses how an ageing population presses the need for sustainable   | Capacity building through health services and policy research training in the following                                                                                                        |                                                                                               |  |



1  
2  
3  
4  
5  
6  
7  
8  
9  
10  
11  
12  
13  
14  
15  
16  
17  
18  
19  
20  
21  
22  
23  
24  
25  
26  
27  
28  
29  
30  
31  
32  
33  
34  
35  
36  
37  
38  
39  
40  
41  
42  
43  
44  
45  
46  
47

|  |  |  |  |  |  |                    |                                                                                                                                                                                                                                                                                                                                                                                                                                                                                                         |  |  |
|--|--|--|--|--|--|--------------------|---------------------------------------------------------------------------------------------------------------------------------------------------------------------------------------------------------------------------------------------------------------------------------------------------------------------------------------------------------------------------------------------------------------------------------------------------------------------------------------------------------|--|--|
|  |  |  |  |  |  | healthcare system. | competencies: understanding health systems and the policy-making process, integrated knowledge transition activities tailored to the specific needs of primary healthcare clinicians and policy making, networking, negotiation an dialogue, project management, interdisciplinary collaborations among patients researchers health practitioners and policy makers, change management implementation, leadership mentorships and collaboration, analysis and evaluation of health related policies and |  |  |
|--|--|--|--|--|--|--------------------|---------------------------------------------------------------------------------------------------------------------------------------------------------------------------------------------------------------------------------------------------------------------------------------------------------------------------------------------------------------------------------------------------------------------------------------------------------------------------------------------------------|--|--|

For peer review only

|                                                |      |        |    |                                                                                                   |                                                                                                         |                                                                                                                                 |                                                                                                                                                                                     |  |  |
|------------------------------------------------|------|--------|----|---------------------------------------------------------------------------------------------------|---------------------------------------------------------------------------------------------------------|---------------------------------------------------------------------------------------------------------------------------------|-------------------------------------------------------------------------------------------------------------------------------------------------------------------------------------|--|--|
|                                                |      |        |    |                                                                                                   |                                                                                                         |                                                                                                                                 | programs, ensuring capacity for meaningful patient engagement, mobilising existing expertise, support careers, building capacity to apply research to real-world problems.          |  |  |
| Jessup RL, O'Connor DA, Putrik P, et al. 2019. | 2018 | Global | ED |                                                                                                   |                                                                                                         | Increasing pressures from ageing population, increasingly prevalent chronic disease, higher cost of tests, workforce shortages. |                                                                                                                                                                                     |  |  |
| Vainieri M, Noto G, Ferre F, Rosella LC. 2020. | 2020 | Global | ED | Defines sustainability as the ability of a health system to meet the needs of present and future. | broadly discusses how performance monitoring or measurement isn't currently sensitive enough to monitor | Overall short-term bias and perspective of the health system impacts establishing health system sustainability                  | Challenges listed include the need for improvement in data collection management, the need to adopt a patient-based perspective, and how performance measures are used in practice. |  |  |

1  
2  
3  
4  
5  
6  
7  
8  
9  
10  
11  
12  
13  
14  
15  
16  
17  
18  
19  
20  
21  
22  
23  
24  
25  
26  
27  
28  
29  
30  
31  
32  
33  
34  
35  
36  
37  
38  
39  
40  
41  
42  
43  
44  
45  
46  
47

|                                                                          |      |                     |    |  |                                                                                                                                                                                                                                |                                                                                                                         |                                                              |  |  |
|--------------------------------------------------------------------------|------|---------------------|----|--|--------------------------------------------------------------------------------------------------------------------------------------------------------------------------------------------------------------------------------|-------------------------------------------------------------------------------------------------------------------------|--------------------------------------------------------------|--|--|
|                                                                          |      |                     |    |  | health system sustainability                                                                                                                                                                                                   |                                                                                                                         |                                                              |  |  |
| Lo Sardo DR, Thurner S, Sorger J, Duftschmid G, Endel G, Klimek P. 2019. | 2019 | Austria             | EM |  | Measures resilience, however, the paper argues that to be sustainable health systems must be resilient                                                                                                                         | Rising costs, chronic conditions, and ageing                                                                            | To counter unsustainability health systems must be resilient |  |  |
| Williams I, Allen K, Plahe G. 2019.                                      | 2019 | England             | EM |  | Rationing of finances and how this occurs in reality, with reference to the 'seven forms of rationing' (and how this can be applied to see if health systems are sustainable) - e.g., dilution via spreading thin of resources | Recognition that there are perceived barriers to timely release of central funding, and the need to prioritise spending |                                                              |  |  |
| Ammentorp J, Bigi                                                        | 2021 | Australia, Ireland, | EM |  |                                                                                                                                                                                                                                | Challenges to implementing                                                                                              | Communication training programs                              |  |  |

|                                                                                                                |                                                                         |      |                     |    |                                                                                                                              |  |                                                                                                                                                                                                                                                                              |                                                                                                                                                               |  |  |
|----------------------------------------------------------------------------------------------------------------|-------------------------------------------------------------------------|------|---------------------|----|------------------------------------------------------------------------------------------------------------------------------|--|------------------------------------------------------------------------------------------------------------------------------------------------------------------------------------------------------------------------------------------------------------------------------|---------------------------------------------------------------------------------------------------------------------------------------------------------------|--|--|
| 1<br>2<br>3<br>4<br>5<br>6<br>7<br>8<br>9<br>10                                                                | S,<br>Silverman<br>J, et al.<br>2021.                                   |      | Austria,<br>Denmark |    |                                                                                                                              |  | programs:<br>convincing<br>investors,<br>involving<br>stakeholders,<br>locating change<br>agents                                                                                                                                                                             | → improving<br>competencies and<br>knowledge<br>related to patient<br>centred care                                                                            |  |  |
| 11<br>12<br>13<br>14<br>15<br>16<br>17<br>18<br>19<br>20<br>21<br>22<br>23<br>24<br>25<br>26<br>27<br>28<br>29 | Braithwait<br>e J,<br>Mannion<br>R,<br>Matsuyam<br>a Y, et al.<br>2018. | 2018 | Global              | ED |                                                                                                                              |  | Common<br>pressures or<br>stressors are<br>manifesting in<br>every healthcare<br>system; these<br>include scarcity<br>of financial and<br>staff resources,<br>expectations of<br>the public, and<br>maintaining<br>healthy<br>relationships<br>with multiple<br>stakeholders |                                                                                                                                                               |  |  |
| 30<br>31<br>32<br>33<br>34<br>35<br>36<br>37<br>38<br>39<br>40<br>41<br>42<br>43<br>44<br>45<br>46<br>47       | Buttigieg<br>SC. 2019.                                                  | 2019 | Global              | ED | Sustainabilit<br>y in<br>healthcare<br>defined as<br>“key task<br>for health<br>policy-<br>makers to<br>withstand<br>social, |  | Challenges<br>discussed<br>include service<br>delivery, human<br>resources,<br>leadership and<br>governance                                                                                                                                                                  | “Among these<br>include an open<br>innovation<br>strategy that<br>redesigns sharing<br>intellectual<br>property,<br>resources, and<br>data – and<br>therefore |  |  |

1  
2  
3  
4  
5  
6  
7  
8  
9  
10  
11  
12  
13  
14  
15  
16  
17  
18  
19  
20  
21  
22  
23  
24  
25  
26  
27  
28  
29  
30  
31  
32  
33  
34  
35  
36  
37  
38  
39  
40  
41  
42  
43  
44  
45  
46  
47

|                                             |      |        |    |                                                     |  |  |                                                                                                                                                                                            |                                                                                                                                                                                                                                                                                     |  |
|---------------------------------------------|------|--------|----|-----------------------------------------------------|--|--|--------------------------------------------------------------------------------------------------------------------------------------------------------------------------------------------|-------------------------------------------------------------------------------------------------------------------------------------------------------------------------------------------------------------------------------------------------------------------------------------|--|
|                                             |      |        |    | financial, and ecological pressures and challenges" |  |  | introducing flexibility, easier accessibility to libraries and collections of molecular entities, as well as opportunities for external researchers to work alongside company scientists." |                                                                                                                                                                                                                                                                                     |  |
| Byskov J, Maluka S, Marchal B, et al. 2019. | 2019 | Global | RA |                                                     |  |  |                                                                                                                                                                                            | "The debate on defining and operationalizing more sustainable systems approaches by more strongly including a priority setting and a decision-making process guidance raises the question whether (1) technical evidence-based information is most important and can be improved by |  |

For peer review only

1  
2  
3  
4  
5  
6  
7  
8  
9  
10  
11  
12  
13  
14  
15  
16  
17  
18  
19  
20  
21  
22  
23  
24  
25  
26  
27  
28  
29  
30  
31  
32  
33  
34  
35  
36  
37  
38  
39  
40  
41  
42  
43  
44  
45  
46  
47

|                                                |      |        |    |  |  |                                                                                                                             |                                                                                                                                                                                      |                                                                                                                                                                                                                                                                 |  |
|------------------------------------------------|------|--------|----|--|--|-----------------------------------------------------------------------------------------------------------------------------|--------------------------------------------------------------------------------------------------------------------------------------------------------------------------------------|-----------------------------------------------------------------------------------------------------------------------------------------------------------------------------------------------------------------------------------------------------------------|--|
|                                                |      |        |    |  |  |                                                                                                                             |                                                                                                                                                                                      | more participatory value and specific context-based approaches (Baltussen et al., 2013) or (2) the participatory democratically based approaches (Biehl and Petryna, 2013; Daniels et al., 2015) are most important, but need support from technical evidence.” |  |
| O'Brien N, Li R, Isaranuwatchai W, et al. 2019 | 2019 | Global | ED |  |  | Paper looking at HTA as a means of improving HSS. Cites confusion over definition of HTA as a barrier to its implementation | "Health technology assessment (HTA) is a multi-disciplinary exercise for assessing the clinical and cost-effectiveness of technologies in the form mainly of programs of health (and |                                                                                                                                                                                                                                                                 |  |

1  
2  
3  
4  
5  
6  
7  
8  
9  
10  
11  
12  
13  
14  
15  
16  
17  
18  
19  
20  
21  
22  
23  
24  
25  
26  
27  
28  
29  
30  
31  
32  
33  
34  
35  
36  
37  
38  
39  
40  
41  
42  
43  
44  
45  
46  
47

|                                                      |      |        |    |  |  |                                                                                                                                                   |                                                                                                                                                                                                                                    |  |  |
|------------------------------------------------------|------|--------|----|--|--|---------------------------------------------------------------------------------------------------------------------------------------------------|------------------------------------------------------------------------------------------------------------------------------------------------------------------------------------------------------------------------------------|--|--|
|                                                      |      |        |    |  |  |                                                                                                                                                   | sometimes social) care, together with their associated structural, procedural and implementation arrangements".. Governments consequently need to take responsibility for the development of strong and sustainable health systems |  |  |
| Hanney S, Kanya L, Pokhrel S, Jones T, Boaz A. 2020. | 2020 | Global | RA |  |  | Research funding is a major barrier to HS research and therefore health systems cannot be improved. Discusses waste in research and fragmentation | " WHO Health Evidence Network Synthesis Reports. What is the evidence on policies, interventions and tools for establishing and/or strengthening national health research systems and their effectiveness? Copenhagen:             |  |  |

For peer review only

|                                                                               |      |        |             |                                         |  |                             |                                                                                                                                                                                  |                            |  |
|-------------------------------------------------------------------------------|------|--------|-------------|-----------------------------------------|--|-----------------------------|----------------------------------------------------------------------------------------------------------------------------------------------------------------------------------|----------------------------|--|
|                                                                               |      |        |             |                                         |  |                             | WHO Regional Office for Europe"                                                                                                                                                  |                            |  |
| Bentley C, Peacock S, Abelson J, et al. 2019.                                 | 2019 | Canada | EM          |                                         |  | Expensive cancer treatment. | The paper calls to use cost effective decisions and involve patients when making cancer funding decisions. Also, to disinvestment if that treatment becomes less effective later |                            |  |
| Braithwaite J, Vincent C, Nicklin W, Amalberti R. 2019.                       | 2019 | Global | ED          |                                         |  |                             | We will need to reflect a reasons health journey overall in evaluations and treatment                                                                                            |                            |  |
| Braithwaite J, Zurynski Y, Ludlow K, Holt J, Augustsson H, Campbell M.. 2019. | 2019 | Global | EM protocol | Defines fiscal sustainability, equality |  |                             |                                                                                                                                                                                  |                            |  |
| Rudnicka E,                                                                   | 2020 | Global | ED          |                                         |  |                             | An ageing population                                                                                                                                                             | establishing a platform of |  |



1  
2  
3  
4  
5  
6  
7  
8  
9  
10  
11  
12  
13  
14  
15  
16  
17  
18  
19  
20  
21  
22  
23  
24  
25  
26  
27  
28  
29  
30  
31  
32  
33  
34  
35  
36  
37  
38  
39  
40  
41  
42  
43  
44  
45  
46  
47

|                                                                                                       |  |  |  |  |  |  |  |                                                                                                                                                                                                                                                                                                                                                                                                                                                                                                |  |
|-------------------------------------------------------------------------------------------------------|--|--|--|--|--|--|--|------------------------------------------------------------------------------------------------------------------------------------------------------------------------------------------------------------------------------------------------------------------------------------------------------------------------------------------------------------------------------------------------------------------------------------------------------------------------------------------------|--|
| <p>Napierała P,<br/>Podfigurna A,<br/>Męczekalski B,<br/>Smolarczyk R,<br/>Grymowicz M.<br/>2020.</p> |  |  |  |  |  |  |  | <p>innovation and change, support country planning and action, collect better global data on health ageing, promoting research that addresses the current and future needs of older people, aligning health systems to the needs of older people, laying the foundations for a long-term care system in every country, Ensuring the human resources necessary for integrated care, undertaking a global campaign to combat ageism, defining an economic case for investment, Enhancing the</p> |  |
|-------------------------------------------------------------------------------------------------------|--|--|--|--|--|--|--|------------------------------------------------------------------------------------------------------------------------------------------------------------------------------------------------------------------------------------------------------------------------------------------------------------------------------------------------------------------------------------------------------------------------------------------------------------------------------------------------|--|

For peer review only

1  
2  
3  
4  
5  
6  
7  
8  
9  
10  
11  
12  
13  
14  
15  
16  
17  
18  
19  
20  
21  
22  
23  
24  
25  
26  
27  
28  
29  
30  
31  
32  
33  
34  
35  
36  
37  
38  
39  
40  
41  
42  
43  
44  
45  
46  
47

|                            |      |        |    |  |                                                                                                                                                                                                                                                                                                                               |  |  |                                                         |  |
|----------------------------|------|--------|----|--|-------------------------------------------------------------------------------------------------------------------------------------------------------------------------------------------------------------------------------------------------------------------------------------------------------------------------------|--|--|---------------------------------------------------------|--|
|                            |      |        |    |  |                                                                                                                                                                                                                                                                                                                               |  |  | global network for age-friendly cities and communities. |  |
| Shen H, Sui Y, Fu Y. 2020. | 2020 | Global | EM |  | This paper looks at apply social choice theory and the Stochastic Multicriteria Acceptability Analysis for group decision making (SMAA-2) to measure the value of health systems. The measurement consistent of three metrics; access, satisfaction, and efficiency, and considers individual preference to each. The article |  |  |                                                         |  |

1  
2  
3  
4  
5  
6  
7  
8  
9  
10  
11  
12  
13  
14  
15  
16  
17  
18  
19  
20  
21  
22  
23  
24  
25  
26  
27  
28  
29  
30  
31  
32  
33  
34  
35  
36  
37  
38  
39  
40  
41  
42  
43  
44  
45  
46  
47

|                                                       |      |        |    |  |                                                                                                                                |  |                                                                                                                                                        |  |  |
|-------------------------------------------------------|------|--------|----|--|--------------------------------------------------------------------------------------------------------------------------------|--|--------------------------------------------------------------------------------------------------------------------------------------------------------|--|--|
|                                                       |      |        |    |  | suggested that measuring value is the ultimate goal of modern healthcare and can assist in building sustainable health systems |  |                                                                                                                                                        |  |  |
| Fridell M, Edwin S, von Schreeb J, Saulnier DD. 2020. | 2020 | Global | RA |  |                                                                                                                                |  | Implies that resilience is essential to a sustainable healthcare system. Common factors contributing to resilience included: financing, highly skilled |  |  |

For peer review only

|                    |      |        |    |  |  |                                                                                                                                                                      |                                                                                                                                                                                           |                                                                                                                      |  |
|--------------------|------|--------|----|--|--|----------------------------------------------------------------------------------------------------------------------------------------------------------------------|-------------------------------------------------------------------------------------------------------------------------------------------------------------------------------------------|----------------------------------------------------------------------------------------------------------------------|--|
|                    |      |        |    |  |  |                                                                                                                                                                      | workforce, continuous collection of information at the population level, leadership and governance, medical products (such as vaccines and affordable medications), and service delivery. |                                                                                                                      |  |
| Walsh K. 2019.     | 2019 | Global | ED |  |  | Limited budget: "Health systems strengthening is a challenge – how can we improve access, coverage, quality and efficiency, and still keep within a limited budget?" | Developing human resource potential through e-learning                                                                                                                                    | Broadening e-learning through online simulations, build on access (e.g., expand to mobile devices and apps)          |  |
| De Santis M. 2019. | 2019 | Global | RA |  |  | Change is expensive and incremental, integrated care is hard to quantify                                                                                             | Suggests that integrated care is a solution to system fragmentation, efficiency, and high costs in chronic disease and rare diseases                                                      | To achieve and scale integrated care there must be: political support and commitment, strong governance, stakeholder |  |

1  
2  
3  
4  
5  
6  
7  
8  
9  
10  
11  
12  
13  
14  
15  
16  
17  
18  
19  
20  
21  
22  
23  
24  
25  
26  
27  
28  
29  
30  
31  
32  
33  
34  
35  
36  
37  
38  
39  
40  
41  
42  
43  
44  
45  
46  
47

|                                           |      |                |    |  |  |                                                                                                   |                                                                                                                                                                                |                                                                                                                                                                                                                                 |  |
|-------------------------------------------|------|----------------|----|--|--|---------------------------------------------------------------------------------------------------|--------------------------------------------------------------------------------------------------------------------------------------------------------------------------------|---------------------------------------------------------------------------------------------------------------------------------------------------------------------------------------------------------------------------------|--|
|                                           |      |                |    |  |  |                                                                                                   |                                                                                                                                                                                | engagement, organisational change, leadership, workforce education and training, patient focus/empowerment, financing incentives, ICT infrastructure and solutions, monitoring/evaluation system                                |  |
| Ferrelli RM, Fantini B, Taruscio D. 2019. | 2019 | European Union | ED |  |  | Affordability and financing of equal access and healthcare delivery for people with rare diseases | Discusses networking or rare diseases providers to improve knowledge and healthcare delivery in the EU. The paper also suggests that resilience is important to sustainability | Discusses levers about to build a sustainable health system for rare diseases. Levers include: organisation structure, partnerships, workforce, knowledge development, leadership and governance, and country specific context. |  |
| Steenhuis S, Struijs J,                   | 2020 | Global         | RA |  |  | Discusses challenges in implementing                                                              | "Our study shows that bundled payment                                                                                                                                          |                                                                                                                                                                                                                                 |  |

|                                                                                                                                                                                                                         |                                |      |                |    |  |                                                                      |                                                                                                                                                                                                                                                                                                                                                                                                                                                                  |                          |  |
|-------------------------------------------------------------------------------------------------------------------------------------------------------------------------------------------------------------------------|--------------------------------|------|----------------|----|--|----------------------------------------------------------------------|------------------------------------------------------------------------------------------------------------------------------------------------------------------------------------------------------------------------------------------------------------------------------------------------------------------------------------------------------------------------------------------------------------------------------------------------------------------|--------------------------|--|
| 1<br>2<br>3<br>4<br>5<br>6<br>7<br>8<br>9<br>10<br>11<br>12<br>13<br>14<br>15<br>16<br>17<br>18<br>19<br>20<br>21<br>22<br>23<br>24<br>25<br>26<br>27<br>28<br>29<br>30<br>31<br>32<br>33<br>34<br>35<br>36<br>37<br>38 | Koolman X, Ket J, E VDH. 2020. |      |                |    |  | and changing payment methods to address health system sustainability | contracts affect a broad range of health system actors, so their design and implementation should not be approached as merely the introduction of a new contracting model, but as part of a broader transformation to a more sustainable, value-based health care system. This approach should not focus on the volume and price of separate health care products but on the full care cycle of patients and the integral costs and outcomes associated with it" |                          |  |
| 39<br>40<br>41<br>42<br>43<br>44<br>45<br>46<br>47                                                                                                                                                                      | Nikolić B. 2020.               | 2020 | European Union | ED |  | Discusses the fiscal                                                 | This paper focuses on                                                                                                                                                                                                                                                                                                                                                                                                                                            | This paper discusses how |  |

1  
2  
3  
4  
5  
6  
7  
8  
9  
10  
11  
12  
13  
14  
15  
16  
17  
18  
19  
20  
21  
22  
23  
24  
25  
26  
27  
28  
29  
30  
31  
32  
33  
34  
35  
36  
37  
38  
39  
40  
41  
42  
43  
44  
45  
46  
47

|                 |      |        |    |  |  |                                                                                                                                                                                         |                                                                                                                                                                                                                   |                                                                                                                                                                                                                                                       |  |
|-----------------|------|--------|----|--|--|-----------------------------------------------------------------------------------------------------------------------------------------------------------------------------------------|-------------------------------------------------------------------------------------------------------------------------------------------------------------------------------------------------------------------|-------------------------------------------------------------------------------------------------------------------------------------------------------------------------------------------------------------------------------------------------------|--|
|                 |      |        |    |  |  | sustainability of health systems, how spending has outpaced GDP and uses Baumols theory and the human factor in healthcare (that much of it cannot be automated) causing costs to rise. | market competition and competition law between providers and how this could improve costs                                                                                                                         | healthcare providers can be considered undertakings through international case law and through guidelines e.g., separation of each activity performed, separation of management activities and calculate the economic nature of each of service item. |  |
| Niraula S. 2019 | 2019 | Canada | ED |  |  | Discusses how cancer medication funding is at odds, and needs to be balanced against, the fiscal sustainability of the healthcare system in Canada. A challenge in this sector is that  | To address the high cost, and maintain fiscal sustainability the authors suggest to: improve collaborations and decrease duplication of efforts in R&D, minimise the conflicts of interest among members, involve |                                                                                                                                                                                                                                                       |  |

1  
2  
3  
4  
5  
6  
7  
8  
9  
10  
11  
12  
13  
14  
15  
16  
17  
18  
19  
20  
21  
22  
23  
24  
25  
26  
27  
28  
29  
30  
31  
32  
33  
34  
35  
36  
37  
38  
39  
40  
41  
42  
43  
44  
45  
46  
47

|                             |      |                  |           |                                                                                                                                                                                              |  |                                                                                                                                           |                                                                                                                                                                                     |  |  |
|-----------------------------|------|------------------|-----------|----------------------------------------------------------------------------------------------------------------------------------------------------------------------------------------------|--|-------------------------------------------------------------------------------------------------------------------------------------------|-------------------------------------------------------------------------------------------------------------------------------------------------------------------------------------|--|--|
|                             |      |                  |           |                                                                                                                                                                                              |  | cancer drugs are expensive                                                                                                                | citizens into decision making process, reconsider the funding model to an outcomes based funding model, incentivise cheaper alternatives (generic drugs) and penalise branded ones. |  |  |
| Pereno A, Eriksson D. 2020. | 2020 | Nordic Countries | EM and RA | “In spite of the different ways to define sustainable healthcare systems, and regardless of whether the three-pillar model or the integrated understanding of sustainability is applied, all |  | In the introduction the paper mentions rising costs, chronic disease, societal pressure such as informed and sometimes demanding patients |                                                                                                                                                                                     |  |  |



1  
2  
3  
4  
5  
6  
7  
8  
9  
10  
11  
12  
13  
14  
15  
16  
17  
18  
19  
20  
21  
22  
23  
24  
25  
26  
27  
28  
29  
30  
31  
32  
33  
34  
35  
36  
37  
38  
39  
40  
41  
42  
43  
44  
45  
46  
47

|                                          |      |                |           |                                                                                                                                                                                                                                |                                                                                          |  |                                                                                                                                  |                                                                        |  |
|------------------------------------------|------|----------------|-----------|--------------------------------------------------------------------------------------------------------------------------------------------------------------------------------------------------------------------------------|------------------------------------------------------------------------------------------|--|----------------------------------------------------------------------------------------------------------------------------------|------------------------------------------------------------------------|--|
|                                          |      |                |           | approaches seem to have in common that a comprehensive approach with a long-term focus and a need to balance economic, social, and ecological interests needs to be used in the discussion of sustainable healthcare systems.” |                                                                                          |  |                                                                                                                                  |                                                                        |  |
| Bogaert P, van Oers H, Van Oyen H. 2018. | 2018 | European Union | EM and RA |                                                                                                                                                                                                                                | By developing a sustainable health information infrastructure for monitoring performance |  | A unified information system with clear governance, central coordination and distributed implementation across EU countries will | Vague - it talks mainly about the structure of the information systems |  |

|                                                 |      |        |    |  |  |                                                                                                                                                                                                                                                                                                                                                           |                                                                                                          |  |  |
|-------------------------------------------------|------|--------|----|--|--|-----------------------------------------------------------------------------------------------------------------------------------------------------------------------------------------------------------------------------------------------------------------------------------------------------------------------------------------------------------|----------------------------------------------------------------------------------------------------------|--|--|
|                                                 |      |        |    |  |  |                                                                                                                                                                                                                                                                                                                                                           | support system performance - provide unified data                                                        |  |  |
| Wurcel V, Cicchetti A, Garrison L, et al. 2019. | 2019 | Global | ED |  |  | financial implications of value of diagnostic information (VODI), including supporting cost containment, allowing timely interventions and preventing disease progression and long term cost. This requires rapid technological pathology testing and turn around times to allow rapid clinical decisions (e.g., point-of-care testing, e-health records) | the need to identify and leverage the benefits of the value of diagnostic information for health systems |  |  |

1  
2  
3  
4  
5  
6  
7  
8  
9  
10  
11  
12  
13  
14  
15  
16  
17  
18  
19  
20  
21  
22  
23  
24  
25  
26  
27  
28  
29  
30  
31  
32  
33  
34  
35  
36  
37  
38  
39  
40  
41  
42  
43  
44  
45  
46  
47

|                                                                  |      |           |    |                                                                  |                            |                                                                                                                                                                       |                                                                                                                                                                |                                                                                                                                           |  |
|------------------------------------------------------------------|------|-----------|----|------------------------------------------------------------------|----------------------------|-----------------------------------------------------------------------------------------------------------------------------------------------------------------------|----------------------------------------------------------------------------------------------------------------------------------------------------------------|-------------------------------------------------------------------------------------------------------------------------------------------|--|
| Cunningham FC, Ranmuthugala G, Westbrook JJ, Braithwaite J. 2019 | 2019 | Australia | ED |                                                                  | Via the framework/network. |                                                                                                                                                                       |                                                                                                                                                                |                                                                                                                                           |  |
| Embi PJ, Richesson R, Tenenbaum J, et al. 2019                   | 2019 | USA       | ED | Learning health system                                           |                            |                                                                                                                                                                       | the research results should extend far beyond the awardees who conduct the research, and there should be collaboration between funding agencies                | that federal funding agencies should see investment in an initiative as an ongoing strategic investment rather than a time-limited option |  |
| Enticott J, Braaf S, Johnson A, Jones A, Teede HJ. 2020.         | 2020 | Australia | EM | Links to a learning health system relying on continuous learning |                            | challenge of engaging multiple stakeholders in governance, research and within the health system itself; having leadership with focus, vision and engagement; skilled | creating a vibrant learning culture with top down and bottom up support; clinician engagement and inclusion; transparency around patient data use and research | importance of consistent investment/funding overtime                                                                                      |  |

|                                                |      |                            |    |                                                                                                                                            |  |                                                                                                                         |                                                                                                                                             |                                                             |  |
|------------------------------------------------|------|----------------------------|----|--------------------------------------------------------------------------------------------------------------------------------------------|--|-------------------------------------------------------------------------------------------------------------------------|---------------------------------------------------------------------------------------------------------------------------------------------|-------------------------------------------------------------|--|
|                                                |      |                            |    |                                                                                                                                            |  | workforce and capacity building; data access and sharing/collaborating with consent                                     |                                                                                                                                             |                                                             |  |
| Park YL, Canaway R. 2019.                      | 2019 | WHO Western Pacific Region | ED | "Healthcare system sustainability and resilience relate to preparedness and capacity to cope in the face of disease outbreak or disaster." |  |                                                                                                                         | Move towards universal healthcare which will enable "quality; efficiency; equity; accountability; and sustainability and resilience"        | Well-established care<br><br>Utilising traditional medicine |  |
| Quaglio G, Figueras J, Mantoan D, et al. 2018. | 2018 | Italy/Belgium              | ED |                                                                                                                                            |  | Y "Over the last 2 decades, health systems in the European Union (EU) are being questioned over their effectiveness and | Y - "(i) community participation is a key principle of health promotion practices, stemming from an ideological position that shifts from a |                                                             |  |

1  
2  
3  
4  
5  
6  
7  
8  
9  
10  
11  
12  
13  
14  
15  
16  
17  
18  
19  
20  
21  
22  
23  
24  
25  
26  
27  
28  
29  
30  
31  
32  
33  
34  
35  
36  
37  
38  
39  
40  
41  
42  
43  
44  
45  
46  
47

|  |  |  |  |  |                                                                                                                                                                                                                                                                                                                                                                                                                                     |                                                                                                                                                                                                                                                                                                                                                                                                                                                                          |  |  |
|--|--|--|--|--|-------------------------------------------------------------------------------------------------------------------------------------------------------------------------------------------------------------------------------------------------------------------------------------------------------------------------------------------------------------------------------------------------------------------------------------|--------------------------------------------------------------------------------------------------------------------------------------------------------------------------------------------------------------------------------------------------------------------------------------------------------------------------------------------------------------------------------------------------------------------------------------------------------------------------|--|--|
|  |  |  |  |  | <p>sustainability. In pursuing both goals, they have to conciliate coexisting, not always aligned, realities. For example, (i) an epidemiological transition where chronic conditions and complex patients require integrated services pivoting around primary care, that contrasts with the prevalence of specialized, rather fragmented care, mainly provided by hospitals;1,2 (ii) a pervasive idea that more care is always</p> | <p>bio-medical paradigm towards a social model that creates conditions where people are active participants in their own healthcare;16 (ii) strengthening primary care is one of the major challenges facing EU healthcare systems as they reduce fragmentation in care provision. Decision makers are searching for models that are able to increase the whole pathway of care: primary, secondary and tertiary, long-term care and eventually social care;17 (iii)</p> |  |  |
|--|--|--|--|--|-------------------------------------------------------------------------------------------------------------------------------------------------------------------------------------------------------------------------------------------------------------------------------------------------------------------------------------------------------------------------------------------------------------------------------------|--------------------------------------------------------------------------------------------------------------------------------------------------------------------------------------------------------------------------------------------------------------------------------------------------------------------------------------------------------------------------------------------------------------------------------------------------------------------------|--|--|

For peer review only

1  
2  
3  
4  
5  
6  
7  
8  
9  
10  
11  
12  
13  
14  
15  
16  
17  
18  
19  
20  
21  
22  
23  
24  
25  
26  
27  
28  
29  
30  
31  
32  
33  
34  
35  
36  
37  
38  
39  
40  
41  
42  
43  
44  
45  
46  
47

|  |  |  |  |  |                                                                                                                                                                                                                                                                                                                                                                                                                                                                   |                                                                                                                                                                                                                                                                                                                                                                                                                                                                                        |  |  |
|--|--|--|--|--|-------------------------------------------------------------------------------------------------------------------------------------------------------------------------------------------------------------------------------------------------------------------------------------------------------------------------------------------------------------------------------------------------------------------------------------------------------------------|----------------------------------------------------------------------------------------------------------------------------------------------------------------------------------------------------------------------------------------------------------------------------------------------------------------------------------------------------------------------------------------------------------------------------------------------------------------------------------------|--|--|
|  |  |  |  |  | <p>better than less care, when there is a widespread evidence of inappropriate use of treatments and technologies;<sup>3</sup> (iii) the rising promise of personalized medicine, that eclipses the efforts in promoting healthy lifestyles;<sup>4</sup> or (iv) the increasing demand of information and transparency with respect to services' quality and safety, that contrasts with serious flaws in the good governance of health services.<sup>5</sup></p> | <p>threats to good governance—lack of appropriate competences, the existence of conflicts of interest, bureaucratic rigidity—translate into a lack of transparency, poorly thought-out policies and the prevailing use of the 'low-hanging fruit' strategy;<sup>18</sup> and (iv) finally, the generation and reuse of health data (administrative, clinical, environmental, etc.) are essential in embracing the change in the knowledge paradigm towards learning health systems</p> |  |  |
|--|--|--|--|--|-------------------------------------------------------------------------------------------------------------------------------------------------------------------------------------------------------------------------------------------------------------------------------------------------------------------------------------------------------------------------------------------------------------------------------------------------------------------|----------------------------------------------------------------------------------------------------------------------------------------------------------------------------------------------------------------------------------------------------------------------------------------------------------------------------------------------------------------------------------------------------------------------------------------------------------------------------------------|--|--|

1  
2  
3  
4  
5  
6  
7  
8  
9  
10  
11  
12  
13  
14  
15  
16  
17  
18  
19  
20  
21  
22  
23  
24  
25  
26  
27  
28  
29  
30  
31  
32  
33  
34  
35  
36  
37  
38  
39  
40  
41  
42  
43  
44  
45  
46  
47

|                                                      |      |        |    |  |  |                                                                                                                                                                                                     |                                                                                                |                                                                                                                             |  |
|------------------------------------------------------|------|--------|----|--|--|-----------------------------------------------------------------------------------------------------------------------------------------------------------------------------------------------------|------------------------------------------------------------------------------------------------|-----------------------------------------------------------------------------------------------------------------------------|--|
|                                                      |      |        |    |  |  | Underlying these challenges is a profound transition in the medical knowledge paradigm, from the traditional and prevailing heuristic approach to the development of data-driven learning systems." | and subsequently toward more sustainable health systems"                                       |                                                                                                                             |  |
| Kilbourne AM, Braganza MZ, Bowersox NW, et al. 2019. | 2019 | USA    | EM |  |  | Funding, lack of incentives for researchers to apply their research into practice                                                                                                                   |                                                                                                | Discusses how the learning health system may contribute to incremental change and enhancement of health system performance. |  |
| Lehoux P, Roncarolo F, Silva HP, Boivin A, Denis JL, | 2019 | Global | RA |  |  | "Since the late 1980s, new health technologies not only                                                                                                                                             | Successful health systems are characterized by healthy people, superior care and fairness. The |                                                                                                                             |  |

|                                                                                                                                                                                                                                                 |             |               |           |                                                                                                                                                             |            |                                                                                                                                                |                                                                                                                                                                                                                                                                                 |            |  |
|-------------------------------------------------------------------------------------------------------------------------------------------------------------------------------------------------------------------------------------------------|-------------|---------------|-----------|-------------------------------------------------------------------------------------------------------------------------------------------------------------|------------|------------------------------------------------------------------------------------------------------------------------------------------------|---------------------------------------------------------------------------------------------------------------------------------------------------------------------------------------------------------------------------------------------------------------------------------|------------|--|
| <p>1<br/>2<br/>3<br/>4<br/>5<br/>6<br/>7<br/>8<br/>9<br/>10<br/>11<br/>12<br/>13<br/>14<br/>15<br/>16<br/>17<br/>18<br/>19<br/>20<br/>21<br/>22<br/>23</p> <p>Hebert R. 2019.</p>                                                               |             |               |           |                                                                                                                                                             |            | <p>increased global inequalities, but they also undermined the sustainability of health systems in rich and poor countries alike.</p> <p>"</p> | <p>researchers write that “over the next decades it will be imperative to implement policy mechanisms that can support the development, financing and use of innovations that do not compromise but rather contribute to the success and sustainability of health systems.”</p> |            |  |
| <p>24<br/>25<br/>26<br/>27<br/>28<br/>29<br/>30<br/>31<br/>32<br/>33<br/>34<br/>35<br/>36<br/>37<br/>38<br/>39<br/>40<br/>41<br/>42<br/>43<br/>44<br/>45<br/>46<br/>47</p> <p>Editorial. Healthcar e quarterly (Toronto, Ont.). 2020;22(4 )</p> | <p>2020</p> | <p>Canada</p> | <p>ED</p> | <p>Health systems need the right distribution of educated health professionals who have the right training and mindset; the skills and support to build</p> | <p>Yes</p> | <p>Yes</p>                                                                                                                                     | <p>Yes</p>                                                                                                                                                                                                                                                                      | <p>Yes</p> |  |



1  
2  
3  
4  
5  
6  
7  
8  
9  
10  
11  
12  
13  
14  
15  
16  
17  
18  
19  
20  
21  
22  
23  
24  
25  
26  
27  
28  
29  
30  
31  
32  
33  
34  
35  
36  
37  
38  
39  
40  
41  
42  
43  
44  
45  
46  
47

|                                                          |      |        |    |                                                                                                                                                                                                                                                       |                                                                                  |                                                                                                               |  |  |  |
|----------------------------------------------------------|------|--------|----|-------------------------------------------------------------------------------------------------------------------------------------------------------------------------------------------------------------------------------------------------------|----------------------------------------------------------------------------------|---------------------------------------------------------------------------------------------------------------|--|--|--|
|                                                          |      |        |    | effective teams and visionary leaders who co-create compassionate cultures and inclusive partnerships that foster integrated patient-centred care; and the right resources, processes, and tools to deliver solutions for current and future demands. |                                                                                  |                                                                                                               |  |  |  |
| Measuring universal health coverage based on an index of | 2020 | Global | EM |                                                                                                                                                                                                                                                       | Measures of UHC; UHC viewed as way of achieving health system sustainability and | Talks about challenges in achieving UHC- especially for low income countries - identifies per-capita spending |  |  |  |

For peer review only

|                                                                                                                                                                              |             |               |           |                                                              |                                     |                                                                                                                                                                          |  |  |  |
|------------------------------------------------------------------------------------------------------------------------------------------------------------------------------|-------------|---------------|-----------|--------------------------------------------------------------|-------------------------------------|--------------------------------------------------------------------------------------------------------------------------------------------------------------------------|--|--|--|
| <p>effective coverage of health services in 204 countries and territories, 1990-2019: a systematic analysis for the Global Burden of Disease Study 2019. Lancet (London,</p> |             |               |           |                                                              | <p>sustainable health outcomes.</p> | <p>to be able to reach 90% UHC as \$2538...Also identifies USA as outlier - achieves only 82% overall coverage despite spending ~8500 per capita</p>                     |  |  |  |
| <p>Abimbola S, Baatiema L, Bigdeli M.. 2019.</p>                                                                                                                             | <p>2019</p> | <p>Global</p> | <p>RA</p> | <p>Talks about resilient structures and Financing models</p> |                                     | <p>Talks about the challenges of decentralisation - i.e.. Decentralised governance and financing to jurisdictions and the impacts of this model. Australian specific</p> |  |  |  |

1  
2  
3  
4  
5  
6  
7  
8  
9  
10  
11  
12  
13  
14  
15  
16  
17  
18  
19  
20  
21  
22  
23  
24  
25  
26  
27  
28  
29  
30  
31  
32  
33  
34  
35  
36  
37  
38  
39  
40  
41  
42  
43  
44  
45  
46  
47

|                                                                     |             |               |                    |                                                                                                                 |                                                                                                                                                                                                                                                                                                                                                                        |                                                                                               |  |  |  |
|---------------------------------------------------------------------|-------------|---------------|--------------------|-----------------------------------------------------------------------------------------------------------------|------------------------------------------------------------------------------------------------------------------------------------------------------------------------------------------------------------------------------------------------------------------------------------------------------------------------------------------------------------------------|-----------------------------------------------------------------------------------------------|--|--|--|
| <p>Barbazza E, Kringos D, Kruse I, Klazinga NS, Tello JE. 2019.</p> | <p>2019</p> | <p>Global</p> | <p>EM &amp; RA</p> | <p>Provides a definition of a sustainable primary care system that is linked with the broader health system</p> | <p>Provides a framework "The resulting framework applies a performance continuum in the classical approach of structures-processes-outcomes spanning 6 domains – primary care structures, model of primary care, care contact, primary care outputs, health system outcomes, and health outcomes – that are further classified by 26 subdomains and 63 features of</p> | <p>Lack of standardised data collection; poor linkage of primary care with broader system</p> |  |  |  |
|---------------------------------------------------------------------|-------------|---------------|--------------------|-----------------------------------------------------------------------------------------------------------------|------------------------------------------------------------------------------------------------------------------------------------------------------------------------------------------------------------------------------------------------------------------------------------------------------------------------------------------------------------------------|-----------------------------------------------------------------------------------------------|--|--|--|

For peer review only

|                                |      |          |    |                                                                                                                                                                                                                                                        |                                      |                                                                                                                                                   |            |     |  |
|--------------------------------|------|----------|----|--------------------------------------------------------------------------------------------------------------------------------------------------------------------------------------------------------------------------------------------------------|--------------------------------------|---------------------------------------------------------------------------------------------------------------------------------------------------|------------|-----|--|
|                                |      |          |    |                                                                                                                                                                                                                                                        | primary care."                       |                                                                                                                                                   |            |     |  |
| Craig N, Robinson M. 2019.     | 2019 | Scotland | ED | Yes                                                                                                                                                                                                                                                    |                                      | Yes                                                                                                                                               |            | Yes |  |
| Costa-Font J, Levaggi R. 2020. | 2020 | Global   | ED | This perspective paper argues that a sustainable health system design encompasses identifying opportunities and incentives for innovation, alongside an analysis of its effect on expenditure. Although aging alone is not a powerful cost driver, the | Mainly in terms of economic outcomes | Focuses on ageing and increasing demands for new medical technologies including new treatments but talks about the potential impact of prevention | Prevention | Yes |  |

1  
2  
3  
4  
5  
6  
7  
8  
9  
10  
11  
12  
13  
14  
15  
16  
17  
18  
19  
20  
21  
22  
23  
24  
25  
26  
27  
28  
29  
30  
31  
32  
33  
34  
35  
36  
37  
38  
39  
40  
41  
42  
43  
44  
45  
46  
47

|  |  |  |  |                                                                                                                                                                                                                                                                                                                                        |  |  |  |  |  |
|--|--|--|--|----------------------------------------------------------------------------------------------------------------------------------------------------------------------------------------------------------------------------------------------------------------------------------------------------------------------------------------|--|--|--|--|--|
|  |  |  |  | <p>combined effect of costly innovation, personalized care, and the rise of chronic conditions is. We identify an increasing role of prevention, the reduction of the prevalence of chronic conditions, re-organisation of incentives in health care markets, including a closer scrutiny of the appropriateness of new treatments</p> |  |  |  |  |  |
|--|--|--|--|----------------------------------------------------------------------------------------------------------------------------------------------------------------------------------------------------------------------------------------------------------------------------------------------------------------------------------------|--|--|--|--|--|

For peer review only

|    |                |      |        |    |                                                  |                                                                                                                                                              |                                                                                                                                                                                                                                                                                                                                                                                     |                                                                                                                                                                                                                                                               |                                                                                                                                                                                                                                                                                                                                                                                                                                                    |
|----|----------------|------|--------|----|--------------------------------------------------|--------------------------------------------------------------------------------------------------------------------------------------------------------------|-------------------------------------------------------------------------------------------------------------------------------------------------------------------------------------------------------------------------------------------------------------------------------------------------------------------------------------------------------------------------------------|---------------------------------------------------------------------------------------------------------------------------------------------------------------------------------------------------------------------------------------------------------------|----------------------------------------------------------------------------------------------------------------------------------------------------------------------------------------------------------------------------------------------------------------------------------------------------------------------------------------------------------------------------------------------------------------------------------------------------|
| 1  |                |      |        |    |                                                  |                                                                                                                                                              |                                                                                                                                                                                                                                                                                                                                                                                     |                                                                                                                                                                                                                                                               |                                                                                                                                                                                                                                                                                                                                                                                                                                                    |
| 2  |                |      |        |    |                                                  |                                                                                                                                                              |                                                                                                                                                                                                                                                                                                                                                                                     |                                                                                                                                                                                                                                                               |                                                                                                                                                                                                                                                                                                                                                                                                                                                    |
| 3  |                |      |        |    |                                                  |                                                                                                                                                              |                                                                                                                                                                                                                                                                                                                                                                                     |                                                                                                                                                                                                                                                               |                                                                                                                                                                                                                                                                                                                                                                                                                                                    |
| 4  |                |      |        |    |                                                  |                                                                                                                                                              |                                                                                                                                                                                                                                                                                                                                                                                     |                                                                                                                                                                                                                                                               |                                                                                                                                                                                                                                                                                                                                                                                                                                                    |
| 5  | Derakhshani N, | 2020 | Global | RA | UHC is implied to be a sustainable health system | Focussed on UHC as a goal for sustainability ; uses a framework and several dimensions... Talks about determinants, barriers and enablers of sustainable UHC | Service delivery (dimension 5) is another dimension of the suggested tool with four axes: basic benefits package, geographical access, quality of care, and human resources for health. In regards to the benefits package axes, developing an affordable, sustainable, and equitable basic package of health care services that can serve various population needs is a challenge. | Yes - talks about culture, integration, seamless care. Diffusion of Excellence practices in making a difference every day for veterans, this article highlights 4 different practice areas: 1) direct scheduling, 2) access to health care in rural areas, 3) | Yes - Social infrastructure and social sustainability (dimensions 1–2) seem to be influential factors in progress towards UHC: society literacy, community income, poverty, age group, and population. <sup>54</sup> To reach social sustainability and providing social infrastructure, as well as providing sustainable development, political will and determination, technical skills, expertise, and administrative cooperation are required. |
| 6  | Doshman gir L, |      |        |    |                                                  |                                                                                                                                                              |                                                                                                                                                                                                                                                                                                                                                                                     |                                                                                                                                                                                                                                                               |                                                                                                                                                                                                                                                                                                                                                                                                                                                    |
| 7  | Ahmadi         |      |        |    |                                                  |                                                                                                                                                              |                                                                                                                                                                                                                                                                                                                                                                                     |                                                                                                                                                                                                                                                               |                                                                                                                                                                                                                                                                                                                                                                                                                                                    |
| 8  | A, Fakhri      |      |        |    |                                                  |                                                                                                                                                              |                                                                                                                                                                                                                                                                                                                                                                                     |                                                                                                                                                                                                                                                               |                                                                                                                                                                                                                                                                                                                                                                                                                                                    |
| 9  | A, Sadeghi-    |      |        |    |                                                  |                                                                                                                                                              |                                                                                                                                                                                                                                                                                                                                                                                     |                                                                                                                                                                                                                                                               |                                                                                                                                                                                                                                                                                                                                                                                                                                                    |
| 10 | Bazargani      |      |        |    |                                                  |                                                                                                                                                              |                                                                                                                                                                                                                                                                                                                                                                                     |                                                                                                                                                                                                                                                               |                                                                                                                                                                                                                                                                                                                                                                                                                                                    |
| 11 | H, Gordeev     |      |        |    |                                                  |                                                                                                                                                              |                                                                                                                                                                                                                                                                                                                                                                                     |                                                                                                                                                                                                                                                               |                                                                                                                                                                                                                                                                                                                                                                                                                                                    |
| 12 | VS. 2020.      |      |        |    |                                                  |                                                                                                                                                              |                                                                                                                                                                                                                                                                                                                                                                                     |                                                                                                                                                                                                                                                               |                                                                                                                                                                                                                                                                                                                                                                                                                                                    |
| 13 |                |      |        |    |                                                  |                                                                                                                                                              |                                                                                                                                                                                                                                                                                                                                                                                     |                                                                                                                                                                                                                                                               |                                                                                                                                                                                                                                                                                                                                                                                                                                                    |
| 14 |                |      |        |    |                                                  |                                                                                                                                                              |                                                                                                                                                                                                                                                                                                                                                                                     |                                                                                                                                                                                                                                                               |                                                                                                                                                                                                                                                                                                                                                                                                                                                    |
| 15 |                |      |        |    |                                                  |                                                                                                                                                              |                                                                                                                                                                                                                                                                                                                                                                                     |                                                                                                                                                                                                                                                               |                                                                                                                                                                                                                                                                                                                                                                                                                                                    |
| 16 |                |      |        |    |                                                  |                                                                                                                                                              |                                                                                                                                                                                                                                                                                                                                                                                     |                                                                                                                                                                                                                                                               |                                                                                                                                                                                                                                                                                                                                                                                                                                                    |
| 17 |                |      |        |    |                                                  |                                                                                                                                                              |                                                                                                                                                                                                                                                                                                                                                                                     |                                                                                                                                                                                                                                                               |                                                                                                                                                                                                                                                                                                                                                                                                                                                    |
| 18 |                |      |        |    |                                                  |                                                                                                                                                              |                                                                                                                                                                                                                                                                                                                                                                                     |                                                                                                                                                                                                                                                               |                                                                                                                                                                                                                                                                                                                                                                                                                                                    |
| 19 |                |      |        |    |                                                  |                                                                                                                                                              |                                                                                                                                                                                                                                                                                                                                                                                     |                                                                                                                                                                                                                                                               |                                                                                                                                                                                                                                                                                                                                                                                                                                                    |
| 20 |                |      |        |    |                                                  |                                                                                                                                                              |                                                                                                                                                                                                                                                                                                                                                                                     |                                                                                                                                                                                                                                                               |                                                                                                                                                                                                                                                                                                                                                                                                                                                    |
| 21 |                |      |        |    |                                                  |                                                                                                                                                              |                                                                                                                                                                                                                                                                                                                                                                                     |                                                                                                                                                                                                                                                               |                                                                                                                                                                                                                                                                                                                                                                                                                                                    |
| 22 |                |      |        |    |                                                  |                                                                                                                                                              |                                                                                                                                                                                                                                                                                                                                                                                     |                                                                                                                                                                                                                                                               |                                                                                                                                                                                                                                                                                                                                                                                                                                                    |
| 23 |                |      |        |    |                                                  |                                                                                                                                                              |                                                                                                                                                                                                                                                                                                                                                                                     |                                                                                                                                                                                                                                                               |                                                                                                                                                                                                                                                                                                                                                                                                                                                    |
| 24 |                |      |        |    |                                                  |                                                                                                                                                              |                                                                                                                                                                                                                                                                                                                                                                                     |                                                                                                                                                                                                                                                               |                                                                                                                                                                                                                                                                                                                                                                                                                                                    |
| 25 |                |      |        |    |                                                  |                                                                                                                                                              |                                                                                                                                                                                                                                                                                                                                                                                     |                                                                                                                                                                                                                                                               |                                                                                                                                                                                                                                                                                                                                                                                                                                                    |
| 26 |                |      |        |    |                                                  |                                                                                                                                                              |                                                                                                                                                                                                                                                                                                                                                                                     |                                                                                                                                                                                                                                                               |                                                                                                                                                                                                                                                                                                                                                                                                                                                    |
| 27 |                |      |        |    |                                                  |                                                                                                                                                              |                                                                                                                                                                                                                                                                                                                                                                                     |                                                                                                                                                                                                                                                               |                                                                                                                                                                                                                                                                                                                                                                                                                                                    |
| 28 |                |      |        |    |                                                  |                                                                                                                                                              |                                                                                                                                                                                                                                                                                                                                                                                     |                                                                                                                                                                                                                                                               |                                                                                                                                                                                                                                                                                                                                                                                                                                                    |
| 29 |                |      |        |    |                                                  |                                                                                                                                                              |                                                                                                                                                                                                                                                                                                                                                                                     |                                                                                                                                                                                                                                                               |                                                                                                                                                                                                                                                                                                                                                                                                                                                    |
| 30 |                |      |        |    |                                                  |                                                                                                                                                              |                                                                                                                                                                                                                                                                                                                                                                                     |                                                                                                                                                                                                                                                               |                                                                                                                                                                                                                                                                                                                                                                                                                                                    |
| 31 |                |      |        |    |                                                  |                                                                                                                                                              |                                                                                                                                                                                                                                                                                                                                                                                     |                                                                                                                                                                                                                                                               |                                                                                                                                                                                                                                                                                                                                                                                                                                                    |
| 32 |                |      |        |    |                                                  |                                                                                                                                                              |                                                                                                                                                                                                                                                                                                                                                                                     |                                                                                                                                                                                                                                                               |                                                                                                                                                                                                                                                                                                                                                                                                                                                    |
| 33 |                |      |        |    |                                                  |                                                                                                                                                              |                                                                                                                                                                                                                                                                                                                                                                                     |                                                                                                                                                                                                                                                               |                                                                                                                                                                                                                                                                                                                                                                                                                                                    |
| 34 |                |      |        |    |                                                  |                                                                                                                                                              |                                                                                                                                                                                                                                                                                                                                                                                     |                                                                                                                                                                                                                                                               |                                                                                                                                                                                                                                                                                                                                                                                                                                                    |
| 35 |                |      |        |    |                                                  |                                                                                                                                                              |                                                                                                                                                                                                                                                                                                                                                                                     |                                                                                                                                                                                                                                                               |                                                                                                                                                                                                                                                                                                                                                                                                                                                    |
| 36 |                |      |        |    |                                                  |                                                                                                                                                              |                                                                                                                                                                                                                                                                                                                                                                                     |                                                                                                                                                                                                                                                               |                                                                                                                                                                                                                                                                                                                                                                                                                                                    |
| 37 |                |      |        |    |                                                  |                                                                                                                                                              |                                                                                                                                                                                                                                                                                                                                                                                     |                                                                                                                                                                                                                                                               |                                                                                                                                                                                                                                                                                                                                                                                                                                                    |
| 38 |                |      |        |    |                                                  |                                                                                                                                                              |                                                                                                                                                                                                                                                                                                                                                                                     |                                                                                                                                                                                                                                                               |                                                                                                                                                                                                                                                                                                                                                                                                                                                    |
| 39 |                |      |        |    |                                                  |                                                                                                                                                              |                                                                                                                                                                                                                                                                                                                                                                                     |                                                                                                                                                                                                                                                               |                                                                                                                                                                                                                                                                                                                                                                                                                                                    |
| 40 |                |      |        |    |                                                  |                                                                                                                                                              |                                                                                                                                                                                                                                                                                                                                                                                     |                                                                                                                                                                                                                                                               |                                                                                                                                                                                                                                                                                                                                                                                                                                                    |
| 41 |                |      |        |    |                                                  |                                                                                                                                                              |                                                                                                                                                                                                                                                                                                                                                                                     |                                                                                                                                                                                                                                                               |                                                                                                                                                                                                                                                                                                                                                                                                                                                    |
| 42 |                |      |        |    |                                                  |                                                                                                                                                              |                                                                                                                                                                                                                                                                                                                                                                                     |                                                                                                                                                                                                                                                               |                                                                                                                                                                                                                                                                                                                                                                                                                                                    |
| 43 |                |      |        |    |                                                  |                                                                                                                                                              |                                                                                                                                                                                                                                                                                                                                                                                     |                                                                                                                                                                                                                                                               |                                                                                                                                                                                                                                                                                                                                                                                                                                                    |
| 44 |                |      |        |    |                                                  |                                                                                                                                                              |                                                                                                                                                                                                                                                                                                                                                                                     |                                                                                                                                                                                                                                                               |                                                                                                                                                                                                                                                                                                                                                                                                                                                    |
| 45 |                |      |        |    |                                                  |                                                                                                                                                              |                                                                                                                                                                                                                                                                                                                                                                                     |                                                                                                                                                                                                                                                               |                                                                                                                                                                                                                                                                                                                                                                                                                                                    |
| 46 |                |      |        |    |                                                  |                                                                                                                                                              |                                                                                                                                                                                                                                                                                                                                                                                     |                                                                                                                                                                                                                                                               |                                                                                                                                                                                                                                                                                                                                                                                                                                                    |
| 47 |                |      |        |    |                                                  |                                                                                                                                                              |                                                                                                                                                                                                                                                                                                                                                                                     |                                                                                                                                                                                                                                                               |                                                                                                                                                                                                                                                                                                                                                                                                                                                    |

1  
2  
3  
4  
5  
6  
7  
8  
9  
10  
11  
12  
13  
14  
15  
16  
17  
18  
19  
20  
21  
22  
23  
24  
25  
26  
27  
28  
29  
30  
31  
32  
33  
34  
35  
36  
37  
38  
39  
40  
41  
42  
43  
44  
45  
46  
47

|                 |      |     |    |                         |                                                            |  |                                                                                                                                                                                                                                                                                                                    |                                                                                                                                                                                                                                                                                                        |  |
|-----------------|------|-----|----|-------------------------|------------------------------------------------------------|--|--------------------------------------------------------------------------------------------------------------------------------------------------------------------------------------------------------------------------------------------------------------------------------------------------------------------|--------------------------------------------------------------------------------------------------------------------------------------------------------------------------------------------------------------------------------------------------------------------------------------------------------|--|
|                 |      |     |    |                         |                                                            |  |                                                                                                                                                                                                                                                                                                                    | Political commitment can be a pivotal issue in progress to achieve UHC. Socio-political and economic sustainability essential to support a sustainable UHC                                                                                                                                             |  |
| Clancy C. 2019. | 2019 | USA | ED | Not as such... indirect | talks about data to support innovation and measure success |  | Yes - talks about culture, integration, seamless care. Diffusion of Excellence practices in making a difference every day for veterans, this article highlights 4 different practice areas: 1) direct scheduling, 2) access to health care in rural areas, 3) access to mental health care, and 4) interactive and | large national network providing care to 9 million veterans; Importance of systems and data. The next challenge, however, is elevating such lessons learned to transition the initiative from a nascent start-up to a sustainable part of VHA's culture. There are 3 primary components of the current |  |

1  
2  
3  
4  
5  
6  
7  
8  
9  
10  
11  
12  
13  
14  
15  
16  
17  
18  
19  
20  
21  
22  
23  
24  
25  
26  
27  
28  
29  
30  
31  
32  
33  
34  
35  
36  
37  
38  
39  
40  
41  
42  
43  
44  
45  
46  
47

|                                                        |      |     |    |                                                                                                                                                                                                                                             |  |  |                                                                                                                                                                                      |                                                                                                                                                                                                       |  |
|--------------------------------------------------------|------|-----|----|---------------------------------------------------------------------------------------------------------------------------------------------------------------------------------------------------------------------------------------------|--|--|--------------------------------------------------------------------------------------------------------------------------------------------------------------------------------------|-------------------------------------------------------------------------------------------------------------------------------------------------------------------------------------------------------|--|
|                                                        |      |     |    |                                                                                                                                                                                                                                             |  |  | patient-centred care.                                                                                                                                                                | transition plan: 1) cultivate the culture, 2) build partnerships and encourage collaboration, and 3) embrace appropriate technology.                                                                  |  |
| Marcotte LM, Moriates C, Wolfson DB, Frankel RM. 2020. | 2020 | USA | ED | indirectly describes sustainability through high value care, professionalism and education and appropriate incentives and remuneration; It talks about re-conceptualising high value in terms of "infusing" this concept as a principle for |  |  | Yes - supporting professionalism is seen a more durable intervention rather than dealing with incentives for single aspects of practice. Linking professionalism with payment reform | "Medical professionalism is a strong, durable, intrinsic motivator for improving value in healthcare delivery and should be employed to support training efforts, systems change and payment reform". |  |



1  
2  
3  
4  
5  
6  
7  
8  
9  
10  
11  
12  
13  
14  
15  
16  
17  
18  
19  
20  
21  
22  
23  
24  
25  
26  
27  
28  
29  
30  
31  
32  
33  
34  
35  
36  
37  
38  
39  
40  
41  
42  
43  
44  
45  
46  
47

|                                                 |      |        |    |                                                                                                                                                                                                                                                          |  |  |  |  |  |
|-------------------------------------------------|------|--------|----|----------------------------------------------------------------------------------------------------------------------------------------------------------------------------------------------------------------------------------------------------------|--|--|--|--|--|
|                                                 |      |        |    | practice among all doctors in training... Providing high-value care as a competency for doctors in training                                                                                                                                              |  |  |  |  |  |
| Witter S, Palmer N, Balabano va D, et al. 2019. | 2019 | Global | RA | The term “HSS” first came from a recognition of the need to address the distorting effects of increasing expenditure on vertical programmes targeted to address specific diseases and interventions (e.g., HIV/AIDS, polio) in the absence of support to |  |  |  |  |  |

1  
2  
3  
4  
5  
6  
7  
8  
9  
10  
11  
12  
13  
14  
15  
16  
17  
18  
19  
20  
21  
22  
23  
24  
25  
26  
27  
28  
29  
30  
31  
32  
33  
34  
35  
36  
37  
38  
39  
40  
41  
42  
43  
44  
45  
46  
47

|                               |      |           |    |                                                                                                                                                      |                                                   |  |                                                                                                                                                                                           |  |  |
|-------------------------------|------|-----------|----|------------------------------------------------------------------------------------------------------------------------------------------------------|---------------------------------------------------|--|-------------------------------------------------------------------------------------------------------------------------------------------------------------------------------------------|--|--|
|                               |      |           |    | broader systems, while recognising that without strengthening of basic health systems, vertical programmes would be unlikely to deliver as expected. |                                                   |  |                                                                                                                                                                                           |  |  |
| Sturmberg JP. 2018            | 2018 |           | ED |                                                                                                                                                      |                                                   |  | Could work to improve the resilience of patients with multi-morbidities. This has been shown to help prevent overutilization on the health system, as well as improve the QOL of patients |  |  |
| Thistlethwaite JE, Dunston R, | 2019 | Australia | ED |                                                                                                                                                      | Recognise that interprofessional health education |  | The importance and shift of interprofessional education from an organisational                                                                                                            |  |  |

1  
2  
3  
4  
5  
6  
7  
8  
9  
10  
11  
12  
13  
14  
15  
16  
17  
18  
19  
20  
21  
22  
23  
24  
25  
26  
27  
28  
29  
30  
31  
32  
33  
34  
35  
36  
37  
38  
39  
40  
41  
42  
43  
44  
45  
46  
47

|                                          |      |                |    |  |                                                                                                                                                   |                                                                                                                                                                                                                                                            |                                                       |  |  |
|------------------------------------------|------|----------------|----|--|---------------------------------------------------------------------------------------------------------------------------------------------------|------------------------------------------------------------------------------------------------------------------------------------------------------------------------------------------------------------------------------------------------------------|-------------------------------------------------------|--|--|
| Yassine T. 2019.                         |      |                |    |  | needs to be funded constantly (even if funding is relatively small) and that it needs to be able to be adapted to micro, meso and macro processes |                                                                                                                                                                                                                                                            | to a national level, and the role of national funding |  |  |
| Iskrov G, Stefanov R, Ferrelli RM. 2019. | 2019 | European Union | ED |  | Recognition that fiscal sustainability is important, and that achieving this means that more prevalent diseases get more funding                  | The challenge of making primary care accessible, affordable, and reducing unnecessary hospital admissions. Integrating the health workforce to the benefit of the patient. Anticipating for changes in need and changing the health workforce accordingly. |                                                       |  |  |

1  
2  
3  
4  
5  
6  
7  
8  
9  
10  
11  
12  
13  
14  
15  
16  
17  
18  
19  
20  
21  
22  
23  
24  
25  
26  
27  
28  
29  
30  
31  
32  
33  
34  
35  
36  
37  
38  
39  
40  
41  
42  
43  
44  
45  
46  
47

|  |  |  |  |  |  |                                                                                  |  |  |  |
|--|--|--|--|--|--|----------------------------------------------------------------------------------|--|--|--|
|  |  |  |  |  |  | And that constant data collection and analysis could improve policy and practice |  |  |  |
|--|--|--|--|--|--|----------------------------------------------------------------------------------|--|--|--|

\*Note.

ED – editorial, opinion piece; RA – review article, EM – empirical article.

For peer review only

**HOW CAN THE HEALTHCARE SYSTEM DELIVER SUSTAINABLE PERFORMANCE?  
A SCOPING REVIEW**

**ADDITIONAL FILE 2: QUALITY ASSESSMENT**

**Hawker rating for included empirical articles**

| Reference                                                                                                         | Abstract and title | Introduction and aims | Method and data | Sampling | Data analysis | Ethics and bias | Finding and results | Transferability and generalizability | Implications and usefulness | Total (out of 36) |
|-------------------------------------------------------------------------------------------------------------------|--------------------|-----------------------|-----------------|----------|---------------|-----------------|---------------------|--------------------------------------|-----------------------------|-------------------|
| Ament SMC, Gillissen F, Moser A, Maessen JMC, Dirksen CD, von Meyenfeldt MF, et al. 2014                          | 4                  | 4                     | 4               | 3        | 4             | 4               | 4                   | 3                                    | 3                           | 33                |
| Bramesfeld, A., F. Amaddeo, J. Caldas-de-Almeida, G. Cardoso, A. Depaigne-Loth, R. Derenne, V. Donisi et al. 2016 | 4                  | 4                     | 3               | 3        | 4             | 1               | 4                   | 3                                    | 4                           | 30                |
| Buttigieg SC, Schuetz M, Bezzina F. 2016                                                                          | 3                  | 3                     | 4               | 3        | 3             | 4               | 4                   | 3                                    | 4                           | 31                |

|                                                                                    |   |   |   |   |   |   |   |   |   |    |
|------------------------------------------------------------------------------------|---|---|---|---|---|---|---|---|---|----|
| Buykx P,<br>Humphreys JS,<br>Tham R, et al.<br>2012                                | 4 | 4 | 2 | 1 | 1 | 3 | 4 | 2 | 4 | 25 |
| Cho CC,<br>Ramanan RA,<br>Feldman MD.<br>2011                                      | 4 | 3 | 4 | 4 | 4 | 1 | 4 | 3 | 4 | 31 |
| De Rosis S,<br>Nuti S. 2018                                                        | 3 | 4 | 4 | 3 | 4 | 1 | 4 | 3 | 3 | 29 |
| Dunn, P. M., B.<br>B. Arnetz, J. F.<br>Christensen,<br>and L. Homer.<br>2007       | 3 | 4 | 4 | 4 | 4 | 1 | 4 | 3 | 3 | 30 |
| Ehrlich C,<br>Kendall E. 2015                                                      | 4 | 3 | 4 | 3 | 3 | 3 | 4 | 3 | 3 | 30 |
| Farmanova E,<br>Kirvan C,<br>Verma J, et al.<br>2016                               | 4 | 3 | 3 | 2 | 3 | 1 | 4 | 2 | 4 | 26 |
| Foo, C. Y., K.<br>K. Lim, S.<br>Sivasampu, K.<br>B. Dahian, and<br>P. P. Goh. 2015 | 4 | 4 | 3 | 2 | 4 | 2 | 4 | 3 | 3 | 29 |
| Fox, L. A., K.<br>E. Walsh, and<br>E. G. Schainker.<br>2016                        | 4 | 4 | 4 | 1 | 4 | 1 | 4 | 2 | 3 | 27 |
| Garde S, Hullin<br>CM, Chen R, et                                                  | 3 | 4 | 3 | 4 | 4 | 1 | 3 | 2 | 3 | 27 |

1  
2  
3  
4  
5  
6  
7  
8  
9  
10  
11  
12  
13  
14  
15  
16  
17  
18  
19  
20  
21  
22  
23  
24  
25  
26  
27  
28  
29  
30  
31  
32  
33  
34  
35  
36  
37  
38  
39  
40  
41  
42  
43  
44  
45  
46  
47

|                                                                                                                                                                                                                            |   |   |   |   |   |   |   |   |   |    |
|----------------------------------------------------------------------------------------------------------------------------------------------------------------------------------------------------------------------------|---|---|---|---|---|---|---|---|---|----|
| al. 2007;129(Pt 2):1179-1183.                                                                                                                                                                                              |   |   |   |   |   |   |   |   |   |    |
| Global, regional, and national disability-adjusted life-years (DALYs) for 315 diseases and injuries and healthy life expectancy (HALE), 1990-2015: a systematic analysis for the Global Burden of Disease Study 2015. 2016 | 4 | 4 | 4 | 3 | 4 | 3 | 4 | 4 | 4 | 34 |
| Heron, N. 2015.                                                                                                                                                                                                            | 3 | 3 | 4 | 4 | 4 | 1 | 4 | 4 | 2 | 29 |
| Hibbert PD, Thomas MJW, Deakin A, et al. 2018                                                                                                                                                                              | 4 | 4 | 3 | 3 | 4 | 3 | 4 | 3 | 4 | 32 |
| Kerr R, Hendrie DV. 2018                                                                                                                                                                                                   | 4 | 4 | 4 | 3 | 4 | 3 | 4 | 3 | 4 | 33 |
| Levine, S., S. O'Mahony, A. Baron, A. Ansari, C. Deamant, J. Frader, I.                                                                                                                                                    | 4 | 3 | 4 | 3 | 4 | 1 | 4 | 3 | 4 | 30 |

For peer review only

|                                                                                                              |   |   |   |   |   |   |   |   |   |    |
|--------------------------------------------------------------------------------------------------------------|---|---|---|---|---|---|---|---|---|----|
| Leyva, M.<br>Marschke, and<br>M. Preodor.<br>2017                                                            |   |   |   |   |   |   |   |   |   |    |
| Lizarondo, L.,<br>C. Turnbull, T.<br>Kroon, K.<br>Grimmer, A.<br>Bell, S. Kumar,<br>M. McEvoy et<br>al. 2016 | 4 | 4 | 4 | 3 | 4 | 3 | 3 | 3 | 4 | 32 |
| McVeigh J,<br>MacLachlan M,<br>Gilmore B, et<br>al.<br>2016;12(1):49.                                        | 4 | 3 | 3 | 3 | 4 | 4 | 4 | 3 | 3 | 31 |
| McGrath, S. P.,<br>and G. T. Blike.<br>2015                                                                  | 4 | 4 | 4 | 3 | 3 | 1 | 4 | 1 | 2 | 26 |
| Molfenter, T.,<br>D. Gustafson,<br>C. Kilo, A.<br>Bhattacharya,<br>and J. Olsson.<br>2005                    | 2 | 2 | 4 | 2 | 4 | 3 | 3 | 3 | 4 | 27 |
| Rees, G. H.<br>2014                                                                                          | 3 | 4 | 3 | 3 | 4 | 1 | 4 | 3 | 4 | 29 |
| Robertson J,<br>Walkom EJ,<br>Henry DA.<br>2011                                                              | 4 | 4 | 4 | 3 | 4 | 4 | 4 | 3 | 3 | 33 |
| Scheirer MA. Is<br>sustainability                                                                            | 3 | 2 | 3 | 3 | 4 | 4 | 2 | 2 | 4 | 27 |



1  
2  
3  
4  
5  
6  
7  
8  
9  
10  
11  
12  
13  
14  
15  
16  
17  
18  
19  
20  
21  
22  
23  
24  
25  
26  
27  
28  
29  
30  
31  
32  
33  
34  
35  
36  
37  
38  
39  
40  
41  
42  
43  
44  
45  
46  
47

|                                                                                                                 |   |   |   |   |   |   |   |   |   |    |
|-----------------------------------------------------------------------------------------------------------------|---|---|---|---|---|---|---|---|---|----|
| possible? A review and commentary on empirical studies of program sustainability. Am J Eval. 2005;26(3):320-47. |   |   |   |   |   |   |   |   |   |    |
| Schwann, N. M., K. A. Bretz, S. Eid, T. Burger, D. Fry, F. Ackler, P. Evans et al. 2011                         | 4 | 2 | 4 | 2 | 4 | 3 | 3 | 2 | 3 | 27 |
| Shaw J, Wong I, Griffin B, Robertson M, Bhatia RS. 2017                                                         | 3 | 4 | 4 | 2 | 4 | 1 | 4 | 3 | 3 | 28 |
| Solon, O., K. Woo, S. A. Quimbo, R. Shimkhada, J. Florentino, and J. W. Peabody. 2009                           | 4 | 4 | 4 | 3 | 4 | 3 | 4 | 3 | 4 | 33 |
| Stockdale, S. E., J. Zuchowski, L. V. Rubenstein, N. Sapir, E. M.                                               | 4 | 4 | 4 | 3 | 4 | 1 | 4 | 3 | 4 | 31 |

For peer review only

|                                                 |                                                                                                         |   |   |   |   |   |   |   |   |   |    |
|-------------------------------------------------|---------------------------------------------------------------------------------------------------------|---|---|---|---|---|---|---|---|---|----|
| 1<br>2<br>3<br>4<br>5<br>6<br>7<br>8<br>9<br>10 | Yano, L.<br>Altman, J. J.<br>Fickel, S.<br>McDougall, T.<br>Dresselhaus,<br>and A. B.<br>Hamilton. 2016 |   |   |   |   |   |   |   |   |   |    |
| 11<br>12<br>13<br>14                            | Wutzke, S., M.<br>Benton, and R.<br>Verma. 2016                                                         | 4 | 4 | 4 | 3 | 4 | 4 | 4 | 3 | 3 | 33 |
| 15<br>16<br>17                                  | Zhao Y, Russell<br>DJ, Guthridge<br>S, et al. 2017                                                      | 4 | 4 | 4 | 3 | 4 | 3 | 4 | 3 | 4 | 33 |
| 18<br>19<br>20<br>21<br>22<br>23<br>24          | Lo Sardo DR,<br>Thurner S,<br>Sorger J,<br>Duftschmid G,<br>Endel G,<br>Klimek P. 2019.                 | 3 | 3 | 2 | 1 | 4 | 1 | 4 | 3 | 3 | 24 |
| 25<br>26<br>27<br>28                            | Williams I,<br>Allen K, Plahe<br>G. 2019.                                                               | 3 | 4 | 4 | 4 | 4 | 4 | 4 | 4 | 4 | 35 |
| 29<br>30<br>31<br>32                            | Ammertorp J,<br>Bigi S,<br>Silverman J, et<br>al. 2021.                                                 | 4 | 4 | 3 | 3 | 4 | 3 | 4 | 4 | 4 | 33 |
| 33<br>34<br>35<br>36<br>37                      | Bentley C,<br>Peacock S,<br>Abelson J, et al.<br>2019.                                                  | 4 | 4 | 3 | 3 | 3 | 3 | 4 | 4 | 4 | 32 |
| 38<br>39<br>40                                  | Shen H, Sui Y,<br>Fu Y. 2020.                                                                           | 4 | 4 | 2 | 2 | 4 | 4 | 4 | 4 | 4 | 32 |

1  
2  
3  
4  
5  
6  
7  
8  
9  
10  
11  
12  
13  
14  
15  
16  
17  
18  
19  
20  
21  
22  
23  
24  
25  
26  
27  
28  
29  
30  
31  
32  
33  
34  
35  
36  
37  
38  
39  
40  
41  
42  
43  
44  
45  
46  
47

1  
2  
3  
4  
5  
6  
7  
8  
9  
10  
11  
12  
13  
14  
15  
16  
17  
18  
19  
20  
21  
22  
23  
24  
25  
26  
27  
28  
29  
30  
31  
32  
33  
34  
35  
36  
37  
38  
39  
40  
41  
42  
43  
44  
45  
46  
47

|                                                                                                                                                                                                    |   |   |   |   |   |   |   |   |   |    |
|----------------------------------------------------------------------------------------------------------------------------------------------------------------------------------------------------|---|---|---|---|---|---|---|---|---|----|
| Fridell M, Edwin S, von Schreeb J, Saulnier DD. 2020.                                                                                                                                              | 4 | 4 | 3 | 3 | 4 | 4 | 4 | 4 | 4 | 34 |
| Pereno A, Eriksson D. 2020.                                                                                                                                                                        | 3 | 4 | 3 | 3 | 4 | 3 | 4 | 4 | 4 | 32 |
| Bogaert P, van Oers H, Van Oyen H. 2018.                                                                                                                                                           | 4 | 4 | 4 | 3 | 3 | 3 | 4 | 4 | 4 | 33 |
| Enticott J, Braaf S, Johnson A, Jones A, Teede HJ. 2020.                                                                                                                                           | 4 | 4 | 4 | 3 | 4 | 4 | 4 | 3 | 4 | 34 |
| Kilbourne AM, Braganza MZ, Bowersox NW, et al. 2019.                                                                                                                                               | 4 | 3 | 3 | 3 | 4 | 2 | 3 | 4 | 4 | 30 |
| Measuring universal health coverage based on an index of effective coverage of health services in 204 countries and territories, 1990-2019: a systematic analysis for the Global Burden of Disease | 4 | 4 | 4 | 4 | 4 | 3 | 4 | 4 | 4 | 35 |

|                                                                          |   |   |   |   |   |   |   |   |   |    |
|--------------------------------------------------------------------------|---|---|---|---|---|---|---|---|---|----|
| Study 2019.<br>Lancet. 2020.                                             |   |   |   |   |   |   |   |   |   |    |
| Barbazza E,<br>Kringos D,<br>Kruse I,<br>Klazinga NS,<br>Tello JE. 2019. | 4 | 4 | 4 | 4 | 4 | 3 | 4 | 3 | 3 | 33 |

*Note.*

Each category is rated on a 4-point scale (from 1="very poor" to 4="good") to create a total score of up to 36.

1  
2  
3  
4  
5  
6  
7  
8  
9  
10  
11  
12  
13  
14  
15  
16  
17  
18  
19  
20  
21  
22  
23  
24  
25  
26  
27  
28  
29  
30  
31  
32  
33  
34  
35  
36  
37  
38  
39  
40  
41  
42  
43  
44  
45  
46  
47

**AACODS rating for editorial and opinion articles**

| Reference                                                                                                                                        | Authority  |                                                                                          | Accuracy   |                                                                                               | Coverage   |                                                                                                    | Objectivity |                                                                                                           | Date       |                                                                                           | Significance |                                                                                                                                           |
|--------------------------------------------------------------------------------------------------------------------------------------------------|------------|------------------------------------------------------------------------------------------|------------|-----------------------------------------------------------------------------------------------|------------|----------------------------------------------------------------------------------------------------|-------------|-----------------------------------------------------------------------------------------------------------|------------|-------------------------------------------------------------------------------------------|--------------|-------------------------------------------------------------------------------------------------------------------------------------------|
|                                                                                                                                                  | Yes or no? | Comment                                                                                  | Yes or no? | Comment                                                                                       | Yes or no? | Comment                                                                                            | Yes or no?  | Comment                                                                                                   | Yes or no? | Comment                                                                                   | Yes or no?   | Comment                                                                                                                                   |
| Al Dhawi AA, West DJ, Jr., Spinelli RJ, Gompf TA. The challenge of sustaining health care in Oman. <i>Health Care Manager.</i> 2007;26(1):19-30. | Yes        | Authors have authority, relevant references included. Published in peer-reviewed journal | Yes        | Brief clear and met, peer reviewed                                                            | Yes        | Focus on Oman                                                                                      | Yes         | Author bias not explicitly stated, but standpoint is balanced                                             | Yes        | Context of article identifiable. Key contemporary references included                     | Yes          | Important article in recognising threats to the health system in Oman, and a model for sustaining health care reform in Oman is discussed |
| Amalberti, R., W. Nicklin, and J. Braithwaite . 2016. Preparing national health systems to cope with                                             | Yes        | Authors have authority, relevant references included. Published in peer-reviewed journal | Yes        | Aim not explicit, but article to report on an international workshop previously conducted. No | Yes        | Wide coverage, worldwide discussion encapsulating main issues associated with an ageing population | Yes         | Recognise this paper made in association with the International Society of Quality in Health Care (ISQua) | Yes        | Clear date acknowledgement as from 1960-currently (2016 when article was published) . Key | Yes          | Good summary of current worldwide problem, and nuance between cohorts of countries experienci                                             |

|                                                                                                                                                                                 |            |                                                                                                 |            |                                                                                                   |            |                                          |            |                                                                                                                 |            |                                                                              |            |                                                                                                                                       |
|---------------------------------------------------------------------------------------------------------------------------------------------------------------------------------|------------|-------------------------------------------------------------------------------------------------|------------|---------------------------------------------------------------------------------------------------|------------|------------------------------------------|------------|-----------------------------------------------------------------------------------------------------------------|------------|------------------------------------------------------------------------------|------------|---------------------------------------------------------------------------------------------------------------------------------------|
| <p>the impending tsunami of ageing and its associated complexities: Towards more sustainable health care. Int J Qual Health Care 28 (3):412-414. doi:10.1093/intqhc/mzw021.</p> |            |                                                                                                 |            | <p>method reported. Published in peer-reviewed journal</p>                                        |            |                                          |            | <p>and participants from the countries involved. However, offers a balanced opinion of the issues discussed</p> |            | <p>references also included</p>                                              |            | <p>ng an ageing population to different extents</p>                                                                                   |
| <p>Armstrong BK, Gillespie JA, Leeder SR, Rubin GL, Russell LM. Challenges in health and health care for Australia. <i>Medical</i></p>                                          | <p>Yes</p> | <p>Authors have authority, relevant references included. Published in peer-reviewed journal</p> | <p>Yes</p> | <p>Brief clearly stated in presenting the challenges to make a sustainable health care system</p> | <p>Yes</p> | <p>Focus on Australian health system</p> | <p>Yes</p> | <p>Author bias not explicitly stated, but standpoint is balanced</p>                                            | <p>Yes</p> | <p>Context of article identifiable. Key contemporary references included</p> | <p>Yes</p> | <p>Unique and useful article outlining some main challenges of health care, tailored to the health system and context in question</p> |

1  
2  
3  
4  
5  
6  
7  
8  
9  
10  
11  
12  
13  
14  
15  
16  
17  
18  
19  
20  
21  
22  
23  
24  
25  
26  
27  
28  
29  
30  
31  
32  
33  
34  
35  
36  
37  
38  
39  
40  
41  
42  
43  
44  
45  
46  
47

|                                                                                                                                                      |     |                                                                                                                           |     |                                                  |     |                                                                                                             |     |                                                                                                                    |     |                                                                                 |     |                                                                                                                                   |
|------------------------------------------------------------------------------------------------------------------------------------------------------|-----|---------------------------------------------------------------------------------------------------------------------------|-----|--------------------------------------------------|-----|-------------------------------------------------------------------------------------------------------------|-----|--------------------------------------------------------------------------------------------------------------------|-----|---------------------------------------------------------------------------------|-----|-----------------------------------------------------------------------------------------------------------------------------------|
| <i>Journal of Australia.</i><br>2007;187(9):485-489.                                                                                                 |     |                                                                                                                           |     |                                                  |     |                                                                                                             |     |                                                                                                                    |     |                                                                                 |     |                                                                                                                                   |
| Atmore C. The role of medical generalism in the New Zealand health system into the future. <i>New Zealand Medical Journal.</i> 2015;128(1419):50-55. | Yes | Authors have authority, relevant references included. Published in peer-reviewed journal                                  | Yes | Brief clear and met, no method provided          | Yes | New Zealand health care specific, but recognises that the solution could be applied to other health systems | Yes | Author bias not explicitly stated, but standpoint is balanced                                                      | Yes | Context of article identifiable. Key contemporary references included           | Yes | Emphasises the importance of being a generalist and how this could trailblaze this new role and system design for other countries |
| Barasa EW, Cloete K, Gilson L. From bouncing back, to nurturing emergence: reframing the concept of resilience in health systems                     | Yes | Authors have authority and are from various continents around the globe, relevant references included. Published in peer- | Yes | Brief described and met. No methodology provided | Yes | Worldwide coverage that aligns with the authors diverse backgrounds                                         | Yes | Well balanced presentation incorporating worldwide need to nurture everyday resilience in health care, rather than | Yes | Framed around the Ebola outbreak (2014-2016). Contemporary references also used | Yes | Relevant worldwide to all health systems                                                                                          |

|                                                                                                                                                              |           |                                                                                                                   |     |                                                                                          |     |                                                            |     |                                                                                           |     |                                                                                                         |     |                                                                                                                        |
|--------------------------------------------------------------------------------------------------------------------------------------------------------------|-----------|-------------------------------------------------------------------------------------------------------------------|-----|------------------------------------------------------------------------------------------|-----|------------------------------------------------------------|-----|-------------------------------------------------------------------------------------------|-----|---------------------------------------------------------------------------------------------------------|-----|------------------------------------------------------------------------------------------------------------------------|
| strengthening. <i>Health policy and planning</i> . 2017;32(suppl_3):iii91-iii94.                                                                             |           | reviewed journal                                                                                                  |     |                                                                                          |     |                                                            |     | just in emergencies                                                                       |     |                                                                                                         |     |                                                                                                                        |
| Bessler JS, Ellies M. Values and value--a vision for the Australian health care system. <i>Australian Health Review</i> . 1995;18(3):6-17; discussion 18-29. | Partially | Authors have authority in IT but not healthcare, relevant references included. Published in peer-reviewed journal | Yes | Brief clear and met, no method provided, peer-reviewed                                   | Yes | Focus on Australian health system                          | Yes | Author bias not explicitly stated, but standpoint is clear                                | Yes | Context of article identified as current (at time of publication). Key contemporary references included | Yes | Investigates the need for health reform to address rising costs with the health system and increase its sustainability |
| Birch S, Murphy GT, MacKenzie A, Cumming J. In place of fear: aligning health care                                                                           | Yes       | Authors have authority in a combination of fields (health economics, policy                                       | Yes | Clear brief in outlining the current healthcare expenditure, and creating the healthcare | Yes | Worldwide, with examples from Australia, the UK and Canada | Yes | Authors standpoint clear. Examples from numerous countries and from reviews in the field, | Yes | Context of article identifiable. Key contemporary references included                                   | Yes | Presents a healthcare sustainability framework                                                                         |



1  
2  
3  
4  
5  
6  
7  
8  
9  
10  
11  
12  
13  
14  
15  
16  
17  
18  
19  
20  
21  
22  
23  
24  
25  
26  
27  
28  
29  
30  
31  
32  
33  
34  
35  
36  
37  
38  
39  
40  
41  
42  
43  
44  
45  
46  
47

|                                                                                                                                        |     |                                                                                                          |     |                                                                                                                          |     |                                                                                                                                                              |     |                                                                            |     |                                                                       |     |                                                                                                     |
|----------------------------------------------------------------------------------------------------------------------------------------|-----|----------------------------------------------------------------------------------------------------------|-----|--------------------------------------------------------------------------------------------------------------------------|-----|--------------------------------------------------------------------------------------------------------------------------------------------------------------|-----|----------------------------------------------------------------------------|-----|-----------------------------------------------------------------------|-----|-----------------------------------------------------------------------------------------------------|
| planning with system objectives to achieve financial sustainability. Journal of Health Services & Research Policy. 2015;20(2):109-114. |     | analysis, health services and nursing), relevant references included. Published in peer-reviewed journal |     | sustainability framework to identify determinants of healthcare expenditure, so that it can evolve with population needs |     |                                                                                                                                                              |     | seems well balanced.                                                       |     |                                                                       |     |                                                                                                     |
| Buchan J. What difference does ("good") HRM make? <i>Human Resources for Health [Electronic Resource]</i> . 2004;2(1):6                | Yes | Authors have authority, relevant references included. Published in peer-reviewed journal                 | Yes | Argument is clear and balanced                                                                                           | Yes | Worldwide context, relates discussion to meeting the sustainable development goals, and discusses the role of human resource management in the health system | Yes | Authors standpoint is clear on the importance of human resource management | Yes | Context of article identifiable. Key contemporary references included | Yes | Contributes the importance of implementing, disseminating and sustaining good HRM in health systems |

|                                                                                                                                                                                     |                                                                                                                                                                                                                                           |     |                                                                                          |     |                                            |     |                                               |     |                                                               |     |                                                                         |     |                                                                                                                                                              |
|-------------------------------------------------------------------------------------------------------------------------------------------------------------------------------------|-------------------------------------------------------------------------------------------------------------------------------------------------------------------------------------------------------------------------------------------|-----|------------------------------------------------------------------------------------------|-----|--------------------------------------------|-----|-----------------------------------------------|-----|---------------------------------------------------------------|-----|-------------------------------------------------------------------------|-----|--------------------------------------------------------------------------------------------------------------------------------------------------------------|
| 1<br>2<br>3<br>4<br>5<br>6<br>7<br>8<br>9<br>10<br>11<br>12<br>13<br>14<br>15<br>16<br>17<br>18<br>19<br>20<br>21<br>22<br>23<br>24<br>25<br>26<br>27<br>28<br>29<br>30<br>31<br>32 | Buchan JM, Naccarella L, Brooks PM. Is health workforce sustainability in Australia and New Zealand a realistic policy goal? <i>Australian health review : a publication of the Australian Hospital Association</i> . 2011;35(2):152-155. | Yes | Authors have authority, relevant references included. Published in peer-reviewed journal | Yes | Brief clear and met, peer reviewed         | Yes | Australia and New Zealand context             | Yes | Author bias not explicitly stated, but standpoint is balanced | Yes | Context of article identifiable. Key contemporary references included   | Yes | Important argument that the health systems in Australia and New Zealand need more focus on prevention , and increasing the productivity of the health system |
| 33<br>34<br>35<br>36<br>37<br>38<br>39<br>40<br>41<br>42<br>43<br>44<br>45<br>46<br>47                                                                                              | Burgess LH, Cohen MR, Denham CR. A new leadership role for                                                                                                                                                                                | Yes | Authors have authority, relevant references included. Published                          | Yes | Aim and method well defined and adhered to | Yes | Worldwide, focusing on pharmacists as leaders | Yes | Author bias not explicitly stated, but standpoint is balanced | Yes | Context of article identifiable but date range of literature search not | Yes | Argues for the importance of pharmacist leaders                                                                                                              |

1  
2  
3  
4  
5  
6  
7  
8  
9  
10  
11  
12  
13  
14  
15  
16  
17  
18  
19  
20  
21  
22  
23  
24  
25  
26  
27  
28  
29  
30  
31  
32  
33  
34  
35  
36  
37  
38  
39  
40  
41  
42  
43  
44  
45  
46  
47

|                                                                                                              |     |                                                                                          |     |                                                                                                      |     |                                                      |     |                                                                |     |                                                                       |     |                                                                                                                         |
|--------------------------------------------------------------------------------------------------------------|-----|------------------------------------------------------------------------------------------|-----|------------------------------------------------------------------------------------------------------|-----|------------------------------------------------------|-----|----------------------------------------------------------------|-----|-----------------------------------------------------------------------|-----|-------------------------------------------------------------------------------------------------------------------------|
| pharmacists: a prescription for change. <i>Journal of patient safety</i> . 2010;6(1):31-37.                  |     | in peer-reviewed journal                                                                 |     |                                                                                                      |     |                                                      |     | and based on peer-reviewed literature                          |     | disclosed. Key contemporary references included                       |     |                                                                                                                         |
| Casale CR, Clancy CM. Commentary: Not about us without us. <i>Academic Medicine</i> . 2009;84(10):1333-1335. | Yes | Authors have authority, relevant references included. Published in peer-reviewed journal | Yes | Clear brief to argue for the use of community-based participatory research for improving health care | Yes | Focus on United States of America health system      | Yes | Author bias not stated, but recognises the bias in health care | Yes | Context of article identifiable. Key contemporary references included | Yes | Presents theoretical arguments for community-based participatory research in response to another article in the journal |
| Cashin A. The challenge of nurse innovation in the Australian context of universal health care.              | Yes | Authors have authority, relevant references included. Published in peer-reviewed journal | Yes | Brief clear and met, no method provided                                                              | Yes | Focus on Australian context, with emphasis on nurses | Yes | Author bias not explicitly stated, but standpoint is balanced  | Yes | Context of article identifiable. Key contemporary references included | Yes | Important article in detailing the concept of universal health care applied to Australia to                             |

|                                                                                                                                      |                                                                                                                                                                         |     |                                                      |     |                                                                                                                          |     |                                                                        |     |                                                               |     |                                                                       |                                     |                                                                             |
|--------------------------------------------------------------------------------------------------------------------------------------|-------------------------------------------------------------------------------------------------------------------------------------------------------------------------|-----|------------------------------------------------------|-----|--------------------------------------------------------------------------------------------------------------------------|-----|------------------------------------------------------------------------|-----|---------------------------------------------------------------|-----|-----------------------------------------------------------------------|-------------------------------------|-----------------------------------------------------------------------------|
| 1<br>2<br>3<br>4<br>5<br>6<br>7                                                                                                      | <i>Collegian</i> . 2015;22(3): 319-324.                                                                                                                                 |     |                                                      |     |                                                                                                                          |     |                                                                        |     |                                                               |     |                                                                       | empower nurse led health innovation |                                                                             |
| 8<br>9<br>10<br>11<br>12<br>13<br>14<br>15<br>16<br>17<br>18<br>19<br>20<br>21<br>22<br>23<br>24<br>25<br>26<br>27<br>28<br>29<br>30 | Chambers DA, Glasgow RE, Stange KC. The dynamic sustainability framework: addressing the paradox of sustainment amid ongoing change. <i>Implement Sci</i> . 2013;8:117. | Yes | Authors have authority, relevant references included | Yes | Aim of research is clear in responding to two frequent assumptions about sustainability (voltage drop and program drift) | Yes | Specific to United States of America health system                     | Yes | Bias not explicitly stated but authors standpoint is balanced | Yes | Context of article identifiable. Key contemporary references included | Yes                                 | Significant as it adds the Dynamic Sustainability Network to the literature |
| 31<br>32<br>33<br>34<br>35<br>36<br>37<br>38<br>39<br>40<br>41<br>42<br>43<br>44<br>45<br>46<br>47                                   | Coiera E, Hovenga EJ. Building a sustainable health system. <i>Yearb Med</i>                                                                                            | Yes | Authors have authority, relevant references included | Yes | Research aim identified and met                                                                                          | Yes | Worldwide, but focuses on the sustainability of current health systems | Yes | Bias not explicitly stated but is present                     | Yes | Context of article identifiable. Key contemporary references included | Yes                                 | Important article with advice on the measurement and improvement of         |

1  
2  
3  
4  
5  
6  
7  
8  
9  
10  
11  
12  
13  
14  
15  
16  
17  
18  
19  
20  
21  
22  
23  
24  
25  
26  
27  
28  
29  
30  
31  
32  
33  
34  
35  
36  
37  
38  
39  
40  
41  
42  
43  
44  
45  
46  
47

|                                                                                                                          |     |                                                                                                                                                                        |     |                                                                                                                                                                    |     |                                                                        |     |                                                                                  |     |                                                                                                                                              |     |                                                                                                                                            |
|--------------------------------------------------------------------------------------------------------------------------|-----|------------------------------------------------------------------------------------------------------------------------------------------------------------------------|-----|--------------------------------------------------------------------------------------------------------------------------------------------------------------------|-----|------------------------------------------------------------------------|-----|----------------------------------------------------------------------------------|-----|----------------------------------------------------------------------------------------------------------------------------------------------|-----|--------------------------------------------------------------------------------------------------------------------------------------------|
| Inform 2007:11–8.                                                                                                        |     |                                                                                                                                                                        |     |                                                                                                                                                                    |     |                                                                        |     |                                                                                  |     |                                                                                                                                              |     | health system sustainability                                                                                                               |
| Crisp N. What would a sustainable health and care system look like? <i>BMJ (Clinical research ed.)</i> . 2017;358:j3895. | Yes | Authors have authority as a member of the House of Lords (and is talking specifically about the NHS), relevant references included. Published in peer-reviewed journal | Yes | Clear brief to argue that sustainability depends on seven factors and that cross-sectional partnerships are needed to increase resilience. No methodology provided | Yes | NHS specific                                                           | Yes | Authors standpoint is clear in their argument                                    | Yes | No date specifically, but from 1978 at the Alma Ata Declaration onwards to time of publication (2017). Contemporary references also included | Yes | Recognition of some factors that need more attention, and also needs further underpinning by the economy and through creative partnerships |
| Delgado, P. 2016. Meeting the Challenge of Chronic Conditions in a Sustainable                                           | Yes | Authors have authority, relevant references included. Published in peer-                                                                                               | Yes | Aim to explore the aims of the Atlantic Healthcare Collaboration for Innovation                                                                                    | Yes | Designed to answer or discuss the aim. No specific method section, but | Yes | Bias not explicitly stated but authors standpoint is clear and based on evidence | Yes | Context of article identifiable but not specific to a particular 'date' e.g., research in                                                    | Yes | Contributes questions and suggestions for future research                                                                                  |

|                                                                                                                                    |     |                                                                                                                      |     |                                                                                                                                  |     |                                                                                           |     |                                                                                                                                |     |                                                                                                                                                                 |     |                                                                               |
|------------------------------------------------------------------------------------------------------------------------------------|-----|----------------------------------------------------------------------------------------------------------------------|-----|----------------------------------------------------------------------------------------------------------------------------------|-----|-------------------------------------------------------------------------------------------|-----|--------------------------------------------------------------------------------------------------------------------------------|-----|-----------------------------------------------------------------------------------------------------------------------------------------------------------------|-----|-------------------------------------------------------------------------------|
| Manner:<br>Building<br>on the<br>AHC<br>Learning.<br>Healthc<br>Pap 15<br>Spec<br>No:90-95;<br>discussion<br>97-123.               |     | reviewed<br>journal                                                                                                  |     | and<br>Improvem<br>ent in<br>Chronic<br>Disease<br>(AHC)<br>and its<br>areas of<br>success<br>and<br>possible<br>improvem<br>ent |     | qualitative<br>and<br>quantitativ<br>e methods<br>employed<br>in a<br>separate<br>article |     | from past<br>research                                                                                                          |     | area was<br>published<br>in 2005,<br>whilst<br>opinion<br>piece<br>published<br>in 2016.<br>However,<br>other key<br>contempor<br>ary<br>references<br>included |     |                                                                               |
| Dhalla I.<br>Canada's<br>health care<br>system and<br>the<br>sustainabili<br>ty paradox.<br><i>Cmaj.</i><br>2007;177(1<br>):51-53. | Yes | Authors<br>have<br>authority,<br>relevant<br>references<br>included.<br>Published<br>in peer-<br>reviewed<br>journal | Yes | Brief<br>stated,<br>view is<br>balanced<br>with<br>arguments<br>from<br>opposing<br>view                                         | Yes | Specific to<br>Canadian<br>health<br>system,<br>with<br>Ontario as<br>an<br>example       | Yes | Bias not<br>explicitly<br>stated, but<br>work<br>seems<br>well<br>balanced<br>and<br>acknowled<br>ges<br>counter-<br>arguments | Yes | Context of<br>article<br>identifiabl<br>e. Key<br>contempor<br>ary<br>references<br>included                                                                    | Yes | Argument<br>is relevant<br>and adds<br>new ideas<br>to existing<br>literature |
| Edwards,<br>N., M.<br>Rowan, P.<br>Marck, and<br>D.<br>Grinspun.<br>2011.                                                          | Yes | Authors<br>have<br>authority,<br>relevant<br>references<br>included.<br>Published                                    | Yes | Clear aim<br>and<br>methods<br>provided                                                                                          | Yes | Specific to<br>Canadian<br>healthcare<br>system                                           | Yes | Bias not<br>stated,<br>article is<br>balanced<br>and<br>limitations<br>are                                                     | Yes | Contempo<br>rary<br>references<br>included                                                                                                                      | Yes | Relevant<br>to<br>Canada's<br>healthcare<br>system                            |

1  
2  
3  
4  
5  
6  
7  
8  
9  
10  
11  
12  
13  
14  
15  
16  
17  
18  
19  
20  
21  
22  
23  
24  
25  
26  
27  
28  
29  
30  
31  
32  
33  
34  
35  
36  
37  
38  
39  
40  
41  
42  
43  
44  
45  
46  
47

|                                                                                                                                                                   |     |                                                                                          |     |                                                                                                                                    |     |                                                                                                                                                                          |     |                                                                                                |     |                                                                                                                                |     |                                                                                                                    |
|-------------------------------------------------------------------------------------------------------------------------------------------------------------------|-----|------------------------------------------------------------------------------------------|-----|------------------------------------------------------------------------------------------------------------------------------------|-----|--------------------------------------------------------------------------------------------------------------------------------------------------------------------------|-----|------------------------------------------------------------------------------------------------|-----|--------------------------------------------------------------------------------------------------------------------------------|-----|--------------------------------------------------------------------------------------------------------------------|
| Understanding whole systems change in health care: the case of nurse practitioners in Canada. Policy Polit Nurs Pract 12 (1):4-17.                                |     | in peer-reviewed journal                                                                 |     |                                                                                                                                    |     |                                                                                                                                                                          |     | acknowledged                                                                                   |     |                                                                                                                                |     |                                                                                                                    |
| Ellner, A. L., S. Stout, E. E. Sullivan, E. P. Griffiths, A. Mountjoy, and R. S. Phillips. 2015. Health Systems Innovation at Academic Health Centers: Leading in | Yes | Authors have authority, relevant references included. Published in peer-reviewed journal | Yes | Aim to argue for increased support for health innovators in academic health centres in the US, and define health system innovation | Yes | Define the scope of their article in introduction: defining health system innovation, distinguishing it from quality improvement, and examining career opportunities for | Yes | Argue that increased support is needed to advance health care goals in academic health centers | Yes | Context of article identifiable but not specific (identified as 21st century in article). Key contemporary references included | Yes | Relevant to US academic medicine, educating medical students, and trying to allow healthcare at a sustainable cost |

|                                                                                                                            |                                                                                                                                                                  |     |                                                                                          |     |                                                                               |                                               |                                  |     |                                                               |     |                                                                                                                                     |     |                                                                                                                                            |
|----------------------------------------------------------------------------------------------------------------------------|------------------------------------------------------------------------------------------------------------------------------------------------------------------|-----|------------------------------------------------------------------------------------------|-----|-------------------------------------------------------------------------------|-----------------------------------------------|----------------------------------|-----|---------------------------------------------------------------|-----|-------------------------------------------------------------------------------------------------------------------------------------|-----|--------------------------------------------------------------------------------------------------------------------------------------------|
| 1<br>2<br>3<br>4<br>5<br>6<br>7<br>8<br>9<br>10<br>11<br>12<br>13<br>14<br>15                                              | a New Era of Health Care Delivery. Acad Med 90 (7):872-880. doi:10.1097/acm.0000000000000679.                                                                    |     |                                                                                          |     |                                                                               | those who will lead health systems innovation |                                  |     |                                                               |     |                                                                                                                                     |     |                                                                                                                                            |
| 16<br>17<br>18<br>19<br>20<br>21<br>22<br>23<br>24<br>25<br>26<br>27<br>28<br>29<br>30<br>31<br>32<br>33<br>34<br>35<br>36 | Fineberg HV. Shattuck Lecture. A successful and sustainable health system-- how to get there from here. New England Journal of Medicine. 2012;366(11):1020-1027. | Yes | Authors have authority, relevant references included. Published in peer-reviewed journal | Yes | Clear examination of USA health system and how to increase its sustainability | Yes                                           | American health care context     | Yes | Author bias not explicitly stated, but standpoint is balanced | Yes | Context of article identifiable as after the 2010 Patient Protection and Affordable Care Act . Key contemporary references included | Yes | Recognises that many steps are needed to ensure a sustainable health system, and identifies characteristics of a sustainable health system |
| 37<br>38<br>39<br>40<br>41<br>42<br>43<br>44<br>45<br>46<br>47                                                             | Gruen RL, Elliott JH, Nolan ML, Lawton                                                                                                                           | Yes | Authors have authority, relevant                                                         | Yes | Research aim and methods                                                      | Yes                                           | Scope of article clearly defined | Yes | Author bias not stated but viewpoint                          | Yes | Context of article identifiable. Key                                                                                                | Yes | Contributes to conversation around                                                                                                         |



1  
2  
3  
4  
5  
6  
7  
8  
9  
10  
11  
12  
13  
14  
15  
16  
17  
18  
19  
20  
21  
22  
23  
24  
25  
26  
27  
28  
29  
30  
31  
32  
33  
34  
35  
36  
37  
38  
39  
40  
41  
42  
43  
44  
45  
46  
47

|                                                                                                                                                                                                                                                     |     |                                                      |     |                                         |     |                                                                     |     |                                                                              |     |                                                                       |     |                                                                                                                         |
|-----------------------------------------------------------------------------------------------------------------------------------------------------------------------------------------------------------------------------------------------------|-----|------------------------------------------------------|-----|-----------------------------------------|-----|---------------------------------------------------------------------|-----|------------------------------------------------------------------------------|-----|-----------------------------------------------------------------------|-----|-------------------------------------------------------------------------------------------------------------------------|
| PD, Parkhill A, McLaren CJ, Lavis JN.                                                                                                                                                                                                               |     | references included                                  |     | stated and met                          |     |                                                                     |     | is balanced                                                                  |     | contemporary references included                                      |     | health system sustainability                                                                                            |
| Greenhalgh, T., F. Macfarlane, C. Barton-Sweeney, and F. Woodard. 2012. "If we build it, will it stay?" A case study of the sustainability of whole-system change in London. <i>Milbank Q</i> 90 (3):516-547. doi:10.1111/j.1468-0009.2012.00673.x. | Yes | Authors have authority, relevant references included | Yes | Research aim and methods stated and met | Yes | Based in London health system, but significance extends beyond that | Yes | Bias minimized through administering of questionnaire by blinded researchers | Yes | Context of article identifiable. Key contemporary references included | Yes | Important article with significance for improving and scaling system change that can be applied to other health systems |
| Guyon A, Hancock T,                                                                                                                                                                                                                                 | Yes | Authors have                                         | Yes | Brief clear and met,                    | Yes | Focus on Canadian                                                   | Yes | Author bias not                                                              | Yes | Context of article                                                    | Yes | Identifies issues                                                                                                       |

|                                                                                                                                                       |                                                                                                                                                                                                                      |           |                                                                                                       |     |                                         |     |                                                                  |     |                                                                                             |     |                                                                                                                               |     |                                                                                        |
|-------------------------------------------------------------------------------------------------------------------------------------------------------|----------------------------------------------------------------------------------------------------------------------------------------------------------------------------------------------------------------------|-----------|-------------------------------------------------------------------------------------------------------|-----|-----------------------------------------|-----|------------------------------------------------------------------|-----|---------------------------------------------------------------------------------------------|-----|-------------------------------------------------------------------------------------------------------------------------------|-----|----------------------------------------------------------------------------------------|
| 1<br>2<br>3<br>4<br>5<br>6<br>7<br>8<br>9<br>10<br>11<br>12<br>13<br>14<br>15<br>16<br>17<br>18<br>19<br>20<br>21<br>22<br>23<br>24<br>25<br>26<br>27 | Kirk M, et al. The weakening of public health: A threat to population health and health care system sustainability. <i>Canadian Journal of Public Health. Revue Canadienne de Sante Publique.</i> 2017;108(1):e1-e6. |           | authority, relevant references included. Published in peer-reviewed journal                           |     | no method provided                      |     | health system                                                    |     | explicitly stated, but standpoint is balanced                                               |     | identifiable and discusses current government policy (at time of publication) in Canada. Key contemporary references included |     | with government approach to public health and responds to each                         |
| 28<br>29<br>30<br>31<br>32<br>33<br>34<br>35<br>36<br>37<br>38<br>39<br>40                                                                            | Hovenga EJ. Impact of data governance on a nation's healthcare system building blocks. <i>Studies in</i>                                                                                                             | Partially | Authors have authority, relevant references included. Unable to determine if journal is peer-reviewed | Yes | Brief clear and met, no method provided | Yes | Worldwide, focusing on 'a nation' to explain national healthcare | Yes | Author bias not explicitly stated, standpoint based on reputable sources e.g., world health | Yes | Context of article identified as current. Key contemporary references included                                                | Yes | Important article educating readers about IT and healthcare and sustainability of that |

1  
2  
3  
4  
5  
6  
7  
8  
9  
10  
11  
12  
13  
14  
15  
16  
17  
18  
19  
20  
21  
22  
23  
24  
25  
26  
27  
28  
29  
30  
31  
32  
33  
34  
35  
36  
37  
38  
39  
40  
41  
42  
43  
44  
45  
46  
47

|                                                                                                                                                                                                      |     |                                                                                          |     |                                                       |     |                                                |     |                                                             |     |                                                                       |     |                                                                                    |
|------------------------------------------------------------------------------------------------------------------------------------------------------------------------------------------------------|-----|------------------------------------------------------------------------------------------|-----|-------------------------------------------------------|-----|------------------------------------------------|-----|-------------------------------------------------------------|-----|-----------------------------------------------------------------------|-----|------------------------------------------------------------------------------------|
| <i>Health Technology &amp; Informatics</i> . 2013;193:24-66.                                                                                                                                         |     |                                                                                          |     |                                                       |     |                                                |     | organisati<br>on                                            |     |                                                                       |     | health<br>system                                                                   |
| Inotai A, Petrova G, Vitezic D, Kalo Z. Benefits of investment into modern medicines in Central-Eastern European countries. Expert review of pharmacoconomics & outcomes research. 2014;14(1):71-79. | Yes | Authors have authority, relevant references included. Published in peer-reviewed journal | Yes | Aim clearly stated and adhered to. No method provided | Yes | Specific to Central Eastern European countries | Yes | Authors standpoint is balanced, citing research and the WHO | Yes | Context of article identifiable. Key contemporary references included | Yes | Relevant, useful arguments for Central Eastern European health systems to consider |
| Kepros JP, Opreanu RC. A new model for                                                                                                                                                               | Yes | Authors have authority, relevant                                                         | Yes | Brief stated and examines the                         | Yes | United States of America                       | Yes | Authors standpoint clear, bias not                          | Yes | Context of article identifiable. Key                                  | Yes | Adds historical context to relationshi                                             |

|                                                                                                                                                            |           |                                                         |     |                                                                         |     |                                                                        |     |                                                               |     |                                                                       |     |                                                                                                                         |
|------------------------------------------------------------------------------------------------------------------------------------------------------------|-----------|---------------------------------------------------------|-----|-------------------------------------------------------------------------|-----|------------------------------------------------------------------------|-----|---------------------------------------------------------------|-----|-----------------------------------------------------------------------|-----|-------------------------------------------------------------------------------------------------------------------------|
| health care delivery. <i>BMC health services research.</i> 2009;9:57.                                                                                      |           | references included. Published in peer-reviewed journal |     | evolving relationship between hospitals, medical schools and physicians |     | health system                                                          |     | explicitly mentioned                                          |     | contemporary references included                                      |     | p between medical schools, hospitals and physicians, and examines the shared vision for the future                      |
| Knutson, D. J. 1997. The role of strategic alliances in ensuring health care quality: a health care system perspective. <i>Clin Ther</i> 19 (6):1572-1578. | Partially | Authors have authority, but no references included      | Yes | Brief clear and met, no method provided                                 | Yes | Specific to HealthSystems Minnesota, but may be applicable more widely | Yes | Author bias not explicitly stated, but standpoint is balanced | Yes | Context of article identifiable. Key contemporary references included | Yes | Important article that focuses on the Chronic Illness Management Research and Development Project (CIMRDP) in Minnesota |
| Lehoux P, Williams-Jones B, Miller F, Urbach D, Tailliez S. What leads                                                                                     | Yes       | Authors are associated with reputable organisations in  | Yes | Authors clear experts in the field within the Canadian Health           | Yes | Coverage is worldwide with very broad factors of sustainabil           | Yes | Authors have more knowledge regarding Canadian system than    | Yes | Context of article identifiable. Key contemporary                     | Yes | Applicable worldwide for industrialized countries to adopt a                                                            |

1  
2  
3  
4  
5  
6  
7  
8  
9  
10  
11  
12  
13  
14  
15  
16  
17  
18  
19  
20  
21  
22  
23  
24  
25  
26  
27  
28  
29  
30  
31  
32  
33  
34  
35  
36  
37  
38  
39  
40  
41  
42  
43  
44  
45  
46  
47

|                                                                                                                                                                                     |  |                                                          |  |                                                                                          |  |                                                                                  |  |                                                                                                                                                                                                                                                                                               |  |                            |  |                                                                                              |
|-------------------------------------------------------------------------------------------------------------------------------------------------------------------------------------|--|----------------------------------------------------------|--|------------------------------------------------------------------------------------------|--|----------------------------------------------------------------------------------|--|-----------------------------------------------------------------------------------------------------------------------------------------------------------------------------------------------------------------------------------------------------------------------------------------------|--|----------------------------|--|----------------------------------------------------------------------------------------------|
| <p>to better health care innovation? Arguments for an integrated policy-oriented research agenda. <i>Journal of Health Services &amp; Research Policy</i>. 2008;13(4): 251-254.</p> |  | <p>their fields. Published in peer reviewed journal.</p> |  | <p>system, and contemporary references are cited. Published in peer reviewed journal</p> |  | <p>ity being discussed, drawing on a workshop at an International conference</p> |  | <p>worldwide and this is stated. The participants from the workshop at the International Workshop of Innovations in Health, from which this paper arose, included participants from Canada, England, Wales, and Finland. The event was funded by various Canadian grants. This standpoint</p> |  | <p>references included</p> |  | <p>new kind of policy-oriented research based on relevance, usability and sustainability</p> |
|-------------------------------------------------------------------------------------------------------------------------------------------------------------------------------------|--|----------------------------------------------------------|--|------------------------------------------------------------------------------------------|--|----------------------------------------------------------------------------------|--|-----------------------------------------------------------------------------------------------------------------------------------------------------------------------------------------------------------------------------------------------------------------------------------------------|--|----------------------------|--|----------------------------------------------------------------------------------------------|

|                                                                                                                                                                                     |     |                                                                                          |     |                                         |     |                                           |     |                                                                     |     |                                      |     |                                     |
|-------------------------------------------------------------------------------------------------------------------------------------------------------------------------------------|-----|------------------------------------------------------------------------------------------|-----|-----------------------------------------|-----|-------------------------------------------|-----|---------------------------------------------------------------------|-----|--------------------------------------|-----|-------------------------------------|
|                                                                                                                                                                                     |     |                                                                                          |     |                                         |     |                                           |     | is clear by the Authors, and yet their opinion piece seems balanced |     |                                      |     |                                     |
| Levin L, Goeree R, Levine M, et al. Coverage with evidence development: the Ontario experience. International journal of technology assessment in health care. 2011;27(2): 159-168. | Yes | Authors have authority, relevant references included. Published in peer-reviewed journal | Yes |                                         | Yes | Focus on health system in Ontario, Canada | Yes |                                                                     |     |                                      |     |                                     |
| Lewis S. Can a learning-disabled                                                                                                                                                    | Yes | Authors have authority, relevant                                                         | Yes | Brief clear and met, no method provided | Yes | Focus on Canadian health system           | Yes | Author bias not explicitly stated, but                              | Yes | Context of article identifiable. Key | Yes | Unique perspective, arguing for the |

1  
2  
3  
4  
5  
6  
7  
8  
9  
10  
11  
12  
13  
14  
15  
16  
17  
18  
19  
20  
21  
22  
23  
24  
25  
26  
27  
28  
29  
30  
31  
32  
33  
34  
35  
36  
37  
38  
39  
40  
41  
42  
43  
44  
45  
46  
47

|                                                                                                                                                                  |           |                                                                                          |     |                                                         |     |                                                                 |     |                                                               |     |                                                                       |     |                                                                           |
|------------------------------------------------------------------------------------------------------------------------------------------------------------------|-----------|------------------------------------------------------------------------------------------|-----|---------------------------------------------------------|-----|-----------------------------------------------------------------|-----|---------------------------------------------------------------|-----|-----------------------------------------------------------------------|-----|---------------------------------------------------------------------------|
| nation learn healthcare lessons from abroad?<br><i>Healthcare policy = Politiques de sante.</i><br>2007;3(2):19-28.                                              |           | references included. Published in peer-reviewed journal                                  |     |                                                         |     |                                                                 |     | standpoint is balanced                                        |     | contemporary references included                                      |     | focus on other aspects of the health system than its sustainability       |
| Liaropoulos L, Goranitis I. Health care financing and the sustainability of health systems.<br><i>International journal for equity in health.</i><br>2015;14:80. | Yes       | Authors have authority, relevant references included. Published in peer-reviewed journal | Yes | Brief clear and met, no method provided                 | Yes | Worldwide, but focusing on cost-effectiveness of health systems | Yes | Author bias not explicitly stated, but standpoint is balanced | Yes | Context of article identifiable. Key contemporary references included | Yes | Investigates the sustainability of health care financing around the world |
| Lozano I, Rondan J, Vegas JM, Segovia E. Sustainability of the                                                                                                   | Partially | Authors have authority, relevant references included.                                    | Yes | Brief clear in replying to original article. No methods | Yes | Spanish health system context                                   | Yes | Author bias not explicitly stated, but standpoint is          | Yes | Context of article identifiable. Key contemporary                     | Yes | Argues that the Spanish health system has many                            |

|                                                                                                                                                                      |                                                                                                                                                        |     |                                                                                          |     |                                         |     |                         |                                                                                  |                                                               |                     |                                                                                                            |                                                                    |                                                                                                                   |
|----------------------------------------------------------------------------------------------------------------------------------------------------------------------|--------------------------------------------------------------------------------------------------------------------------------------------------------|-----|------------------------------------------------------------------------------------------|-----|-----------------------------------------|-----|-------------------------|----------------------------------------------------------------------------------|---------------------------------------------------------------|---------------------|------------------------------------------------------------------------------------------------------------|--------------------------------------------------------------------|-------------------------------------------------------------------------------------------------------------------|
| 1<br>2<br>3<br>4<br>5<br>6<br>7<br>8<br>9<br>10<br>11<br>12<br>13<br>14<br>15<br>16<br>17<br>18<br>19                                                                | Health System: Beyond Cost-effectiveness Analyses. <i>Revista espanola de cardiologia (English ed.)</i> . 2016;69(9): 880-881.                         |     | Journal not peer-reviewed                                                                |     |                                         |     |                         | balanced in addressing original article's viewpoint and rebutting as appropriate |                                                               | references included |                                                                                                            | strengths, but one of its weaknesses is the lack of sustainability |                                                                                                                   |
| 20<br>21<br>22<br>23<br>24<br>25<br>26<br>27<br>28<br>29<br>30<br>31<br>32<br>33<br>34<br>35<br>36<br>37<br>38<br>39<br>40<br>41<br>42<br>43<br>44<br>45<br>46<br>47 | Mackenzie J. The old care paradigm is dead, long live the new sustainable care paradigm: how can GP commissioning consortia meet the demand challenges | Yes | Authors have authority, relevant references included. Published in peer-reviewed journal | Yes | Brief clear and met, no method provided | Yes | Focus on United Kingdom | Yes                                                                              | Author bias not explicitly stated, but standpoint is balanced | Yes                 | Context of article identifiable as beginning from 1948 until present. Key contemporary references included | Yes                                                                | Examines the significance of prevention rather than treatment to increase the sustainability of the health system |



1  
2  
3  
4  
5  
6  
7  
8  
9  
10  
11  
12  
13  
14  
15  
16  
17  
18  
19  
20  
21  
22  
23  
24  
25  
26  
27  
28  
29  
30  
31  
32  
33  
34  
35  
36  
37  
38  
39  
40  
41  
42  
43  
44  
45  
46  
47

|                                                                                                                                         |           |                                                                                          |     |                                                           |     |                                                 |     |                                                               |     |                                                                       |     |                                                                           |
|-----------------------------------------------------------------------------------------------------------------------------------------|-----------|------------------------------------------------------------------------------------------|-----|-----------------------------------------------------------|-----|-------------------------------------------------|-----|---------------------------------------------------------------|-----|-----------------------------------------------------------------------|-----|---------------------------------------------------------------------------|
| of 21st century healthcare?<br><i>London journal of primary care.</i><br>2011;4(1):64-68.                                               |           |                                                                                          |     |                                                           |     |                                                 |     |                                                               |     |                                                                       |     |                                                                           |
| Magnan S, Fisher E, Kindig D, et al. Achieving accountability for health and health care. <i>Minnesota medicine.</i> 2012;95(11):37-39. | Partially | Authors have authority, relevant references included. Journal not peer-reviewed          | Yes | Clear aim that is fulfilled, no method supplied           | Yes | Focus on United States of America health system | Yes | Author bias not explicitly stated, but standpoint is balanced | Yes | Context of article identifiable. Key contemporary references included | Yes | Recognises the importance of the triple aim in health care sustainability |
| McGorry PD, Hamilton MP. Stepwise expansion of evidence-based care is needed for mental                                                 | Yes       | Authors have authority, relevant references included. Published in peer-reviewed journal | Yes | Brief well defined and adhered to. No methodology present | Yes | focus on Australia and the mental health sector | Yes | Author bias not explicitly stated, but standpoint is balanced | Yes | Context of article identifiable. Key contemporary references included | Yes | Recognises the challenges in the system of                                |

|                                                                                                                                                             |           |                                                                                          |     |                                                                                     |     |                                                                                                  |     |                                                               |     |                                                                       |     |                                                                   |
|-------------------------------------------------------------------------------------------------------------------------------------------------------------|-----------|------------------------------------------------------------------------------------------|-----|-------------------------------------------------------------------------------------|-----|--------------------------------------------------------------------------------------------------|-----|---------------------------------------------------------------|-----|-----------------------------------------------------------------------|-----|-------------------------------------------------------------------|
| health reform. <i>The Medical journal of Australia.</i> 2016;204(9):351-353.                                                                                |           |                                                                                          |     |                                                                                     |     |                                                                                                  |     |                                                               |     |                                                                       |     |                                                                   |
| McIntosh E, Nagelkerk J, Vonderheid SC, Poole M, Dontje K, Pohl JM. Financially viable nurse-managed centers. <i>Nurse Pract.</i> 2003;28(3):40, 46-48, 51. | Yes       | Authors have authority, relevant references included. Published in peer-reviewed journal | Yes | Aim not clear, but brief clear and examples used to explain argument. Peer reviewed | Yes | Focus on the role of finance committees in nurse managed centres in the United States of America | Yes | Author bias not explicitly stated, but standpoint is balanced | Yes | Context of article identifiable. Key contemporary references included | Yes | Important article on nurse managed centres and how they function  |
| Nagle LM, Pitts BM. Citizen perspectives on the future of healthcare.                                                                                       | Partially | Authors have authority, relevant references included. Journal                            | Yes | Brief clearly stated and met. No methods provided                                   | Yes | Focus on health system in Ontario, Canada                                                        | Yes | Author bias not explicitly stated, but standpoint is balanced | Yes | Date is explicit (comments on the panel that met from April-June      | Yes | Summarises the recommendations for sustainability from the unique |

1  
2  
3  
4  
5  
6  
7  
8  
9  
10  
11  
12  
13  
14  
15  
16  
17  
18  
19  
20  
21  
22  
23  
24  
25  
26  
27  
28  
29  
30  
31  
32  
33  
34  
35  
36  
37  
38  
39  
40  
41  
42  
43  
44  
45  
46  
47

|                                                                                                                                                                                          |     |                                                                                          |     |                                                     |     |                                                                    |     |                                                                                                  |     |                                                                                                                                    |     |                                                                                                             |
|------------------------------------------------------------------------------------------------------------------------------------------------------------------------------------------|-----|------------------------------------------------------------------------------------------|-----|-----------------------------------------------------|-----|--------------------------------------------------------------------|-----|--------------------------------------------------------------------------------------------------|-----|------------------------------------------------------------------------------------------------------------------------------------|-----|-------------------------------------------------------------------------------------------------------------|
| <i>Healthcare Quarterly.</i> 2012;15(2): 40-45.                                                                                                                                          |     | not peer-reviewed                                                                        |     |                                                     |     |                                                                    |     |                                                                                                  |     | 2011). Contemporary references also included                                                                                       |     | panel of Ontarians                                                                                          |
| Pacifico Silva H, Lehoux P, Miller FA, Denis JL. Introducing responsible innovation in health: a policy-oriented framework. <i>Health Research Policy &amp; Systems.</i> 2018;16(1): 90. | Yes | Authors have authority, relevant references included. Published in peer-reviewed journal | Yes | Research aim identified and met. No method provided | Yes | Worldwide, with examples from the United States and European Union | Yes | Author bias not explicitly stated, but bias of technologies being discussed is explicitly stated | Yes | Context related to responsible research and innovation in health, and thus is centred on when the research on this topic increased | Yes | Contributes a responsible innovations in health framework, with nine dimensions organised into five domains |
| Pencheon D. Developing a sustainable health and care system: lessons for                                                                                                                 | Yes | Authors have authority, relevant references included. Published in peer-                 | Yes | Brief clear and met, no method provided             | Yes | England NHS context                                                | Yes | Author bias not explicitly stated, but standpoint is balanced                                    | Yes | Context identified as the five years previous to publication in 2013 (where                                                        | Yes | Important article highlighting ways in which the health system can be sustained                             |

|                                                                                                                                                                                                                              |     |                                                                                          |     |                                                                                      |     |                                                                |     |                                                                                                                                                                 |     |                                                             |     |                                                                                                    |
|------------------------------------------------------------------------------------------------------------------------------------------------------------------------------------------------------------------------------|-----|------------------------------------------------------------------------------------------|-----|--------------------------------------------------------------------------------------|-----|----------------------------------------------------------------|-----|-----------------------------------------------------------------------------------------------------------------------------------------------------------------|-----|-------------------------------------------------------------|-----|----------------------------------------------------------------------------------------------------|
| research and policy. <i>Journal of Health Services &amp; Research Policy</i> . 2013;18(4): 193-194.                                                                                                                          |     | reviewed journal                                                                         |     |                                                                                      |     |                                                                |     |                                                                                                                                                                 |     | future-proofing the health care was attempted)              |     |                                                                                                    |
| Pronovost, P. J., C. G. Holzmueller, T. Callender, R. Demski, L. Winner, R. Day, J. M. Austin, S. M. Berenholtz, and M. R. Miller. 2016. Sustaining Reliability on Accountability Measures at The Johns Hopkins Hospital. It | Yes | Authors have authority, relevant references included. Published in peer-reviewed journal | Yes | Aim not explicit, but article brief is provided. Methodology provided and adhered to | Yes | Specific and well defined: Johns Hopkins Hospital in 2012-2014 | Yes | Authors clear that they conducted previous research in measuring results of sustainability improvement measures (2012) and the author's efforts to sustain them | Yes | Clear date acknowledged from 2012 (initial results) to 2013 | Yes | Suggests quality could improve through applying the framework used at Johns Hopkins Hospital (JHH) |

1  
2  
3  
4  
5  
6  
7  
8  
9  
10  
11  
12  
13  
14  
15  
16  
17  
18  
19  
20  
21  
22  
23  
24  
25  
26  
27  
28  
29  
30  
31  
32  
33  
34  
35  
36  
37  
38  
39  
40  
41  
42  
43  
44  
45  
46  
47

|                                                                                                                                           |     |                                                                                          |     |                                                                                                          |     |                               |     |                                                                                                                                  |     |                                                                       |     |                                                                                                                 |
|-------------------------------------------------------------------------------------------------------------------------------------------|-----|------------------------------------------------------------------------------------------|-----|----------------------------------------------------------------------------------------------------------|-----|-------------------------------|-----|----------------------------------------------------------------------------------------------------------------------------------|-----|-----------------------------------------------------------------------|-----|-----------------------------------------------------------------------------------------------------------------|
| Comm J Qual Patient Saf 42 (2):51-60.                                                                                                     |     |                                                                                          |     |                                                                                                          |     |                               |     |                                                                                                                                  |     |                                                                       |     |                                                                                                                 |
| Robertson TM, Lofgren RP. Where population health misses the mark: breaking the 80/20 rule. <i>Academic Medicine.</i> 2015;90(3):277-278. | Yes | Authors have authority, relevant references included. Published in peer-reviewed journal | Yes | No aim, but brief clearly stated. Relevant references included. Published in peer reviewed journal.      | Yes | United States health context  | Yes | Bias not explicitly stated but states the aim to reduce health care spending through analysis of medical insurance claim records | Yes | Context of article identifiable. Key contemporary references included | Yes | Adds to the argument of the importance of identifying health spending and working on reducing it where possible |
| Rosenberg-Yunger ZR, Daar AS, Singer PA, Martin DK. Healthcare sustainability and the challenges of innovation to                         | Yes | Authors have authority, relevant references included. Published in peer-reviewed journal | Yes | Clear brief comprising three parts to review government response to biopharmaceuticals and health system | Yes | Focus on Canada health system | Yes | Author bias not explicitly stated, but standpoint is balanced                                                                    | Yes | Context of article identifiable. Key contemporary references included | Yes | Contributes recommendations for the field regarding access to biopharmaceuticals                                |

|                                                                                                    |                                                                                                                          |           |                                                    |     |                                                              |     |                                                                         |     |                                                                                                                                  |     |                                                                                                                |     |                                                                   |
|----------------------------------------------------------------------------------------------------|--------------------------------------------------------------------------------------------------------------------------|-----------|----------------------------------------------------|-----|--------------------------------------------------------------|-----|-------------------------------------------------------------------------|-----|----------------------------------------------------------------------------------------------------------------------------------|-----|----------------------------------------------------------------------------------------------------------------|-----|-------------------------------------------------------------------|
| 1<br>2<br>3<br>4<br>5<br>6<br>7<br>8<br>9<br>10<br>11<br>12<br>13<br>14<br>15                      | biopharmaceuticals in Canada. <i>Health policy (Amsterdam, Netherlands)</i> . 2008;87(3):359-368.                        |           |                                                    |     | sustainability                                               |     |                                                                         |     |                                                                                                                                  |     |                                                                                                                |     |                                                                   |
| 16<br>17<br>18<br>19<br>20<br>21<br>22<br>23<br>24<br>25<br>26<br>27<br>28<br>29<br>30<br>31<br>32 | Rosser, M. 2006. Advancing health system integration through supply chain improvement. <i>Healthc Q</i> 9 (1):62-66, 64. | Partially | Authors have authority, but no references included | Yes | Research aim identified and met                              | Yes | Focus on Canadian health system                                         | Yes | Clear from the article even though bias is not specifically mentioned that the stance of the article is that HMMS are beneficial | Yes | Context of article covers from 1997 (inception of HMMS) and 2006 (article publication). No references included | Yes | Significance evident in the "lessons learned" section             |
| 33<br>34<br>35<br>36<br>37<br>38<br>39<br>40<br>41<br>42<br>43<br>44<br>45<br>46<br>47             | Scott IA. Is modern medicine at risk of losing the plot? <i>The Medical</i>                                              | Yes       | Authors have authority, journal is peer-reviewed   | Yes | Examines if pledges by Australian Government for improvement | Yes | Specific to Australian population health care spending, and the private | Yes | Clear opinion but well balanced argument                                                                                         | Yes | Context of article identifiable. Key contemporary                                                              | Yes | Relevant, adds context to Australian health. Encourages different |

1  
2  
3  
4  
5  
6  
7  
8  
9  
10  
11  
12  
13  
14  
15  
16  
17  
18  
19  
20  
21  
22  
23  
24  
25  
26  
27  
28  
29  
30  
31  
32  
33  
34  
35  
36  
37  
38  
39  
40  
41  
42  
43  
44  
45  
46  
47

|                                                                                                                                                       |     |                                                                                          |     |                                                                                                     |     |                                                          |     |                                                                                                              |     |                                                                       |     |                                                                                                                      |
|-------------------------------------------------------------------------------------------------------------------------------------------------------|-----|------------------------------------------------------------------------------------------|-----|-----------------------------------------------------------------------------------------------------|-----|----------------------------------------------------------|-----|--------------------------------------------------------------------------------------------------------------|-----|-----------------------------------------------------------------------|-----|----------------------------------------------------------------------------------------------------------------------|
| <i>journal of Australia.</i><br>2006;185(4):213-216.                                                                                                  |     |                                                                                          |     | ents to health care are sustainable financially, and in terms of behaviour change on the front line |     | health insurance system of Australia                     |     |                                                                                                              |     | references included                                                   |     | aspects of the health system to work together                                                                        |
| Sepehri A, Chernomas R. Is the Canadian health care system fiscally sustainable? <i>International Journal of Health Services.</i> 2004;34(2):229-243. | Yes | Authors have authority, relevant references included. Published in peer-reviewed journal | Yes | Brief clearly described and met. No methodology                                                     | Yes | Specific to Canadian context                             | Yes | Contains well balanced review of literature, and compares the health systems of Canada and the United States | Yes | Context of article identifiable. Key contemporary references included | Yes | Argued for the best way to increase the sustainability and economic viability of the national Canadian health system |
| Shigayeva A, Coker RJ. Communicable disease                                                                                                           | Yes | Authors have authority, relevant references included.                                    | Yes | Aim clearly stated and met. No methodology                                                          | Yes | Worldwide context, but focus on disease control programs | Yes | Author bias not explicitly stated, but standpoint                                                            | Yes | Context of article identifiable. Key contemporary                     | Yes | Important article that proposes characteristics and a framework                                                      |

|                                                                                                                                                                                            |            |                                                                                                 |            |                                                                                            |            |                                                        |            |                                                                                                                        |            |                                                                              |            |                                                                            |
|--------------------------------------------------------------------------------------------------------------------------------------------------------------------------------------------|------------|-------------------------------------------------------------------------------------------------|------------|--------------------------------------------------------------------------------------------|------------|--------------------------------------------------------|------------|------------------------------------------------------------------------------------------------------------------------|------------|------------------------------------------------------------------------------|------------|----------------------------------------------------------------------------|
| <p>control programmes and health systems: an analytical approach to sustainability. <i>Health policy and planning</i>. 2015;30(3): 368-385.</p>                                            |            | <p>Published in peer-reviewed journal</p>                                                       |            |                                                                                            |            |                                                        |            | <p>is balanced</p>                                                                                                     |            | <p>references included</p>                                                   |            | <p>that may have the potential for sustainability</p>                      |
| <p>Sonnenreich P, Geisler L. Covering the Cost of the Cure: From Hepatitis C to Cancer, New Therapies Are Straining a System Plagued by Inefficiency. <i>P T</i>. 2016;41(9): 565-589.</p> | <p>Yes</p> | <p>Authors have authority, relevant references included. Published in peer-reviewed journal</p> | <p>Yes</p> | <p>Aim not clear, but brief clear and examples used to explain argument. Peer reviewed</p> | <p>Yes</p> | <p>Focus on United States of America health system</p> | <p>Yes</p> | <p>Author bias not explicitly stated, but standpoint is balanced with research from other researchers and articles</p> | <p>Yes</p> | <p>Context of article identifiable. Key contemporary references included</p> | <p>Yes</p> | <p>Examines the evolving notions of value in healthcare, cost vs cure,</p> |



1  
2  
3  
4  
5  
6  
7  
8  
9  
10  
11  
12  
13  
14  
15  
16  
17  
18  
19  
20  
21  
22  
23  
24  
25  
26  
27  
28  
29  
30  
31  
32  
33  
34  
35  
36  
37  
38  
39  
40  
41  
42  
43  
44  
45  
46  
47

|                                                                                                                                                                                 |     |                                                                                          |     |                                         |     |                                                                     |     |                                                                                                                    |     |                                                                                                                                                                                                        |     |                                                                    |
|---------------------------------------------------------------------------------------------------------------------------------------------------------------------------------|-----|------------------------------------------------------------------------------------------|-----|-----------------------------------------|-----|---------------------------------------------------------------------|-----|--------------------------------------------------------------------------------------------------------------------|-----|--------------------------------------------------------------------------------------------------------------------------------------------------------------------------------------------------------|-----|--------------------------------------------------------------------|
| Stoelwinder JU, Paolucci F. Sustaining Medicare through consumer choice of health funds: lessons from the Netherlands. <i>Medical Journal of Australia</i> . 2009;191(1):30-32. | Yes | Authors have authority, relevant references included. Published in peer-reviewed journal | Yes | Brief clear and met, peer reviewed      | Yes | Focus on how Australia can learn from the Netherlands health system | Yes | Author bias not explicitly stated, but standpoint is balanced. Authors are affiliated with Australian institutions | Yes | Context of article identifiable as contemporary (comments on 2008 funding agreement in Australia, but Netherlands health policies since 1941. Published in 2009). Key contemporary references included | Yes | Extracts the application to Australia of the Netherlands policies. |
| Stoelwinder JU. Final report of the National Health and Hospitals Reform                                                                                                        | Yes | Authors have authority, relevant references included. Published in peer-                 | Yes | Brief clear and met, no method provided | Yes | Specific to Australian health system                                | Yes | Author bias not explicitly stated, but standpoint is balanced. Also of                                             | Yes | Context of article identifiable and there is explicit reference to the actions of                                                                                                                      | Yes | Timely article suggesting changes to Australian health system      |

|                                                                                                                                                                                                                                                                                                                |                  |                                                                                        |            |                                                               |            |                                      |            |                                                                                                                                        |            |                                                                                                                                  |            |                                                                                              |
|----------------------------------------------------------------------------------------------------------------------------------------------------------------------------------------------------------------------------------------------------------------------------------------------------------------|------------------|----------------------------------------------------------------------------------------|------------|---------------------------------------------------------------|------------|--------------------------------------|------------|----------------------------------------------------------------------------------------------------------------------------------------|------------|----------------------------------------------------------------------------------------------------------------------------------|------------|----------------------------------------------------------------------------------------------|
| <p>1<br/>2<br/>3<br/>4<br/>5<br/>6<br/>7<br/>8<br/>9<br/>10<br/>11<br/>12<br/>13<br/>14<br/>15<br/>16<br/>17<br/>18<br/>19<br/>20</p> <p>Commission: will we get the health care governance reform we need? <i>The Medical Journal of Australia</i>. 2009;191(7):387-388.</p>                                  |                  | <p>reviewed journal</p>                                                                |            |                                                               |            |                                      |            | <p>note, author declares conflict of interest as they are a board member of Medibank Private</p>                                       |            | <p>the National Health and Hospitals Reform Commission and federal government response. Key contemporary references included</p> |            |                                                                                              |
| <p>21<br/>22<br/>23<br/>24<br/>25<br/>26<br/>27<br/>28<br/>29<br/>30<br/>31<br/>32<br/>33<br/>34<br/>35<br/>36<br/>37<br/>38<br/>39<br/>40</p> <p>Stuart N, Adams J. 2007. The sustainability of Canada's healthcare system: a framework for advancing the debate. <i>Healthcare Quarterly</i> 10: 96–103.</p> | <p>Partially</p> | <p>Authors have authority, relevant references included. Journal not peer-reviewed</p> | <p>Yes</p> | <p>Brief clear and met, no method provided, peer-reviewed</p> | <p>Yes</p> | <p>Focus on Canadian health care</p> | <p>Yes</p> | <p>Author bias not explicitly stated, but standpoint is balanced and bias within the healthcare system is identified and discussed</p> | <p>Yes</p> | <p>Context of article identifiable. Key contemporary references included</p>                                                     | <p>Yes</p> | <p>Examines the importance of improving the sustainability of the Canadian health system</p> |

|                                                                                                       |                                                                                                                                       |           |                                                                                                                          |           |                                                                                                    |     |                                                       |           |                                                                                                          |           |                                                                                                                                    |     |                                                                                                     |
|-------------------------------------------------------------------------------------------------------|---------------------------------------------------------------------------------------------------------------------------------------|-----------|--------------------------------------------------------------------------------------------------------------------------|-----------|----------------------------------------------------------------------------------------------------|-----|-------------------------------------------------------|-----------|----------------------------------------------------------------------------------------------------------|-----------|------------------------------------------------------------------------------------------------------------------------------------|-----|-----------------------------------------------------------------------------------------------------|
| 1<br>2<br>3<br>4<br>5<br>6<br>7<br>8<br>9<br>10<br>11<br>12<br>13<br>14<br>15<br>16<br>17<br>18<br>19 | Taylor M. Australian health care reform: a place for nurse practitioners? <i>Aust Nurs J.</i> 2007;15(6):20-23.                       | Partially | Author information not available, journal not peer-reviewed. However, relevant and peer-reviewed references are included | Yes       | Clear brief to discuss role of NPs in Australia and how the role can be sustainable                | Yes | Focus on the role of nurse practitioners in Australia | Yes       | Author bias not explicitly stated, but standpoint is justified by numerous government reports            | Yes       | Context of article identifiable as after the 2010 Patient Protection and Affordable Care Act. Key contemporary references included | Yes | Recognises and emphasises the emerging role of the nurse practitioner, and how it can be sustained  |
| 20<br>21<br>22<br>23<br>24<br>25<br>26<br>27<br>28<br>29<br>30<br>31<br>32<br>33<br>34                | Thompson RE. Sustainability as the lynch pin of public policy and industry initiatives. <i>Physician executive.</i> 1998;24(4):52-55. | Partially | Authors are associated with reputable organisations in their field. However, journal is not peer-reviewed                | Partially | No clearly stated brief, starts with USA health political history and then to discuss managed care | Yes | American population health                            | Partially | Authors standpoint is clear in their argument. However, it is not particularly balanced in presentation. | Partially | Context of article identifiable. Majority of references are not contemporary                                                       | Yes | Promotes discussion regarding healthcare in the USA, and if and how managed care can be sustainable |
| 35<br>36<br>37<br>38<br>39<br>40<br>41<br>42<br>43<br>44<br>45<br>46<br>47                            | Tsasis P. Chronic disease management and the                                                                                          | Yes       | Authors have authority, relevant references                                                                              | Yes       | Brief clear and met, no method provided                                                            | Yes | Focus on health system in Ontario, Canada             | Yes       | Author bias not explicitly stated, but standpoint                                                        | Yes       | Context of article identifiable. Key contemporary                                                                                  | Yes | Important article, justified in terms of health of                                                  |

|                                                                                                                                        |                                                                                                                                                                                                           |     |                                                                                          |     |                                                                                                         |     |                                                          |             |                                                                                           |                         |                                                                                                                  |                                      |                                                                                                                             |
|----------------------------------------------------------------------------------------------------------------------------------------|-----------------------------------------------------------------------------------------------------------------------------------------------------------------------------------------------------------|-----|------------------------------------------------------------------------------------------|-----|---------------------------------------------------------------------------------------------------------|-----|----------------------------------------------------------|-------------|-------------------------------------------------------------------------------------------|-------------------------|------------------------------------------------------------------------------------------------------------------|--------------------------------------|-----------------------------------------------------------------------------------------------------------------------------|
| 1<br>2<br>3<br>4<br>5<br>6<br>7<br>8<br>9<br>10<br>11<br>12<br>13<br>14                                                                | home-care alternative in Ontario, Canada. Health Serv Manage Res. 2009;22(3):136-139.                                                                                                                     |     | included. Published in peer-reviewed journal                                             |     |                                                                                                         |     |                                                          | is balanced |                                                                                           | ary references included |                                                                                                                  | Canadians, and financial improvement |                                                                                                                             |
| 15<br>16<br>17<br>18<br>19<br>20<br>21<br>22<br>23<br>24<br>25<br>26<br>27<br>28<br>29<br>30<br>31<br>32<br>33<br>34<br>35<br>36<br>37 | Van de Pas R, Hill PS, Hammonds R, et al. Global health governance in the sustainable development goals: Is it grounded in the right to health? <i>Global challenges (Hoboken, NJ)</i> . 2017;1(1):47-60. | Yes | Authors have authority, relevant references included. Published in peer-reviewed journal | Yes | Clear brief regarding analysis of the roots of the sustainable development goals in the right to health | Yes | Worldwide, focusing on the sustainable development goals | Yes         | Author bias not explicitly stated, but standpoint is balanced and urban bias is discussed | Yes                     | Context of article identifiable as post-2015 sustainable development goals. Key contemporary references included | Yes                                  | Unique argument, questions if the sustainable development goals satisfy the right to health, and concludes that they do not |
| 38<br>39<br>40<br>41<br>42<br>43<br>44<br>45<br>46<br>47                                                                               | Veillard J, Denny K. Transforma                                                                                                                                                                           | Yes | Authors have authority,                                                                  | Yes | Clear brief in observatio                                                                               | Yes | Focus on Canadian health                                 | Yes         | Author bias not explicitly                                                                | Yes                     | Context of article identifiable                                                                                  | Yes                                  | Argues five points regarding                                                                                                |

1  
2  
3  
4  
5  
6  
7  
8  
9  
10  
11  
12  
13  
14  
15  
16  
17  
18  
19  
20  
21  
22  
23  
24  
25  
26  
27  
28  
29  
30  
31  
32  
33  
34  
35  
36  
37  
38  
39  
40  
41  
42  
43  
44  
45  
46  
47

|                                                                                                                                                                           |            |                                                                                                 |            |                                                                                  |            |                                                                        |            |                                                                                              |            |                                                                              |            |                                                                                  |
|---------------------------------------------------------------------------------------------------------------------------------------------------------------------------|------------|-------------------------------------------------------------------------------------------------|------------|----------------------------------------------------------------------------------|------------|------------------------------------------------------------------------|------------|----------------------------------------------------------------------------------------------|------------|------------------------------------------------------------------------------|------------|----------------------------------------------------------------------------------|
| <p>tion through Clinical and Social Integration: Meeting the Needs of High Users of Healthcare. <i>Healthcare Papers</i>. 2014;14(2): 4-7.</p>                            |            | <p>relevant references included. Published in peer-reviewed journal</p>                         |            | <p>ns regarding the use of the health system by a minority of the population</p> |            | <p>system, especially Ontario, but message is applicable worldwide</p> |            | <p>stated, but standpoint is well balanced with arguments on many perspectives discussed</p> |            | <p>e. Key contemporary references included</p>                               |            | <p>Ontario's health system and the potential for improvement</p>                 |
| <p>Wakerman J, Humphreys JS. Sustainable workforce and sustainable health systems for rural and remote Australia. <i>The Medical journal of Australia</i>. 2013;199(5</p> | <p>Yes</p> | <p>Authors have authority, relevant references included. Published in peer-reviewed journal</p> | <p>Yes</p> | <p>Brief clear and met, no method provided</p>                                   | <p>Yes</p> | <p>Specific to rural and remote Australia</p>                          | <p>Yes</p> | <p>Author bias not explicitly stated, but standpoint is balanced</p>                         | <p>Yes</p> | <p>Context of article identifiable. Key contemporary references included</p> | <p>Yes</p> | <p>Recognise s interdependence of the health system of urban and rural areas</p> |

|    |                                                                                                                                                                                                                         |     |                                                                                          |     |                                                              |     |                                                                                          |     |                                                                 |     |                                                                       |     |                                                                  |
|----|-------------------------------------------------------------------------------------------------------------------------------------------------------------------------------------------------------------------------|-----|------------------------------------------------------------------------------------------|-----|--------------------------------------------------------------|-----|------------------------------------------------------------------------------------------|-----|-----------------------------------------------------------------|-----|-----------------------------------------------------------------------|-----|------------------------------------------------------------------|
| 1  | Suppl):S14                                                                                                                                                                                                              |     |                                                                                          |     |                                                              |     |                                                                                          |     |                                                                 |     |                                                                       |     |                                                                  |
| 2  | -17.                                                                                                                                                                                                                    |     |                                                                                          |     |                                                              |     |                                                                                          |     |                                                                 |     |                                                                       |     |                                                                  |
| 3  | Woodward, G. L., A. Iverson, R. Harvey, and P. G. Blake. 2015. Implementation of an agency to improve chronic kidney disease care in Ontario: lessons learned by the Ontario Renal Network. Healthc Q 17 Spec No:44-47. | Yes | Authors have authority, relevant references included. Published in peer-reviewed journal | Yes | The aim is adhered to, but there is no relevant methodology. | Yes | Limits of article known (to identify lessons learnt from the CKD agency to improve care) | Yes | Argument that the CKD system has been effective and sustainable | Yes | Context of article identifiable. Key contemporary references included | Yes | Identifies methods used for improving CKD care and their success |
| 4  | Pisco L, Pinto LF. From Alma-Ata to Astana: the path of                                                                                                                                                                 | Yes | all authors from reputable institutions                                                  |     | peer reviewed, but no aim or methodology                     | Yes | Portugal only                                                                            | Yes |                                                                 | Yes | recent references included                                            | Yes |                                                                  |
| 5  |                                                                                                                                                                                                                         |     |                                                                                          |     |                                                              |     |                                                                                          |     |                                                                 |     |                                                                       |     |                                                                  |
| 6  |                                                                                                                                                                                                                         |     |                                                                                          |     |                                                              |     |                                                                                          |     |                                                                 |     |                                                                       |     |                                                                  |
| 7  |                                                                                                                                                                                                                         |     |                                                                                          |     |                                                              |     |                                                                                          |     |                                                                 |     |                                                                       |     |                                                                  |
| 8  |                                                                                                                                                                                                                         |     |                                                                                          |     |                                                              |     |                                                                                          |     |                                                                 |     |                                                                       |     |                                                                  |
| 9  |                                                                                                                                                                                                                         |     |                                                                                          |     |                                                              |     |                                                                                          |     |                                                                 |     |                                                                       |     |                                                                  |
| 10 |                                                                                                                                                                                                                         |     |                                                                                          |     |                                                              |     |                                                                                          |     |                                                                 |     |                                                                       |     |                                                                  |
| 11 |                                                                                                                                                                                                                         |     |                                                                                          |     |                                                              |     |                                                                                          |     |                                                                 |     |                                                                       |     |                                                                  |
| 12 |                                                                                                                                                                                                                         |     |                                                                                          |     |                                                              |     |                                                                                          |     |                                                                 |     |                                                                       |     |                                                                  |
| 13 |                                                                                                                                                                                                                         |     |                                                                                          |     |                                                              |     |                                                                                          |     |                                                                 |     |                                                                       |     |                                                                  |
| 14 |                                                                                                                                                                                                                         |     |                                                                                          |     |                                                              |     |                                                                                          |     |                                                                 |     |                                                                       |     |                                                                  |
| 15 |                                                                                                                                                                                                                         |     |                                                                                          |     |                                                              |     |                                                                                          |     |                                                                 |     |                                                                       |     |                                                                  |
| 16 |                                                                                                                                                                                                                         |     |                                                                                          |     |                                                              |     |                                                                                          |     |                                                                 |     |                                                                       |     |                                                                  |
| 17 |                                                                                                                                                                                                                         |     |                                                                                          |     |                                                              |     |                                                                                          |     |                                                                 |     |                                                                       |     |                                                                  |
| 18 |                                                                                                                                                                                                                         |     |                                                                                          |     |                                                              |     |                                                                                          |     |                                                                 |     |                                                                       |     |                                                                  |
| 19 |                                                                                                                                                                                                                         |     |                                                                                          |     |                                                              |     |                                                                                          |     |                                                                 |     |                                                                       |     |                                                                  |
| 20 |                                                                                                                                                                                                                         |     |                                                                                          |     |                                                              |     |                                                                                          |     |                                                                 |     |                                                                       |     |                                                                  |
| 21 |                                                                                                                                                                                                                         |     |                                                                                          |     |                                                              |     |                                                                                          |     |                                                                 |     |                                                                       |     |                                                                  |
| 22 |                                                                                                                                                                                                                         |     |                                                                                          |     |                                                              |     |                                                                                          |     |                                                                 |     |                                                                       |     |                                                                  |
| 23 |                                                                                                                                                                                                                         |     |                                                                                          |     |                                                              |     |                                                                                          |     |                                                                 |     |                                                                       |     |                                                                  |
| 24 |                                                                                                                                                                                                                         |     |                                                                                          |     |                                                              |     |                                                                                          |     |                                                                 |     |                                                                       |     |                                                                  |
| 25 |                                                                                                                                                                                                                         |     |                                                                                          |     |                                                              |     |                                                                                          |     |                                                                 |     |                                                                       |     |                                                                  |
| 26 |                                                                                                                                                                                                                         |     |                                                                                          |     |                                                              |     |                                                                                          |     |                                                                 |     |                                                                       |     |                                                                  |
| 27 |                                                                                                                                                                                                                         |     |                                                                                          |     |                                                              |     |                                                                                          |     |                                                                 |     |                                                                       |     |                                                                  |
| 28 |                                                                                                                                                                                                                         |     |                                                                                          |     |                                                              |     |                                                                                          |     |                                                                 |     |                                                                       |     |                                                                  |
| 29 |                                                                                                                                                                                                                         |     |                                                                                          |     |                                                              |     |                                                                                          |     |                                                                 |     |                                                                       |     |                                                                  |
| 30 |                                                                                                                                                                                                                         |     |                                                                                          |     |                                                              |     |                                                                                          |     |                                                                 |     |                                                                       |     |                                                                  |
| 31 |                                                                                                                                                                                                                         |     |                                                                                          |     |                                                              |     |                                                                                          |     |                                                                 |     |                                                                       |     |                                                                  |
| 32 |                                                                                                                                                                                                                         |     |                                                                                          |     |                                                              |     |                                                                                          |     |                                                                 |     |                                                                       |     |                                                                  |
| 33 |                                                                                                                                                                                                                         |     |                                                                                          |     |                                                              |     |                                                                                          |     |                                                                 |     |                                                                       |     |                                                                  |
| 34 |                                                                                                                                                                                                                         |     |                                                                                          |     |                                                              |     |                                                                                          |     |                                                                 |     |                                                                       |     |                                                                  |
| 35 |                                                                                                                                                                                                                         |     |                                                                                          |     |                                                              |     |                                                                                          |     |                                                                 |     |                                                                       |     |                                                                  |
| 36 |                                                                                                                                                                                                                         |     |                                                                                          |     |                                                              |     |                                                                                          |     |                                                                 |     |                                                                       |     |                                                                  |
| 37 |                                                                                                                                                                                                                         |     |                                                                                          |     |                                                              |     |                                                                                          |     |                                                                 |     |                                                                       |     |                                                                  |
| 38 |                                                                                                                                                                                                                         |     |                                                                                          |     |                                                              |     |                                                                                          |     |                                                                 |     |                                                                       |     |                                                                  |
| 39 |                                                                                                                                                                                                                         |     |                                                                                          |     |                                                              |     |                                                                                          |     |                                                                 |     |                                                                       |     |                                                                  |
| 40 |                                                                                                                                                                                                                         |     |                                                                                          |     |                                                              |     |                                                                                          |     |                                                                 |     |                                                                       |     |                                                                  |
| 41 |                                                                                                                                                                                                                         |     |                                                                                          |     |                                                              |     |                                                                                          |     |                                                                 |     |                                                                       |     |                                                                  |
| 42 |                                                                                                                                                                                                                         |     |                                                                                          |     |                                                              |     |                                                                                          |     |                                                                 |     |                                                                       |     |                                                                  |
| 43 |                                                                                                                                                                                                                         |     |                                                                                          |     |                                                              |     |                                                                                          |     |                                                                 |     |                                                                       |     |                                                                  |
| 44 |                                                                                                                                                                                                                         |     |                                                                                          |     |                                                              |     |                                                                                          |     |                                                                 |     |                                                                       |     |                                                                  |
| 45 |                                                                                                                                                                                                                         |     |                                                                                          |     |                                                              |     |                                                                                          |     |                                                                 |     |                                                                       |     |                                                                  |
| 46 |                                                                                                                                                                                                                         |     |                                                                                          |     |                                                              |     |                                                                                          |     |                                                                 |     |                                                                       |     |                                                                  |
| 47 |                                                                                                                                                                                                                         |     |                                                                                          |     |                                                              |     |                                                                                          |     |                                                                 |     |                                                                       |     |                                                                  |

1  
2  
3  
4  
5  
6  
7  
8  
9  
10  
11  
12  
13  
14  
15  
16  
17  
18  
19  
20  
21  
22  
23  
24  
25  
26  
27  
28  
29  
30  
31  
32  
33  
34  
35  
36  
37  
38  
39  
40  
41  
42  
43  
44  
45  
46  
47

|                                                                                                                                                                |            |                                                |            |                                 |            |                                                |            |                                   |            |                                   |            |  |
|----------------------------------------------------------------------------------------------------------------------------------------------------------------|------------|------------------------------------------------|------------|---------------------------------|------------|------------------------------------------------|------------|-----------------------------------|------------|-----------------------------------|------------|--|
| <p>Primary Health Care in Portugal, 1978-2018 and the genesis of Family Medicine. <i>Ciencia &amp; saude coletiva</i>. 2020</p>                                |            |                                                |            |                                 |            |                                                |            |                                   |            |                                   |            |  |
| <p>Ganann R, Peacock S, Garnett A, et al. Capacity development among academic trainees in community-based primary health care research: The Aging, Communi</p> | <p>Yes</p> | <p>all authors from reputable institutions</p> | <p>Yes</p> | <p>clear aim and adhered to</p> | <p>Yes</p> | <p>context clearly stated and clear limits</p> | <p>Yes</p> | <p>bias not explicitly stated</p> | <p>Yes</p> | <p>recent references included</p> | <p>Yes</p> |  |

1  
2  
3  
4  
5  
6  
7  
8  
9  
10  
11  
12  
13  
14  
15  
16  
17  
18  
19  
20  
21  
22  
23  
24  
25  
26  
27  
28  
29  
30  
31  
32  
33  
34  
35  
36  
37  
38  
39  
40  
41  
42  
43  
44  
45  
46  
47

|                                                                                                                                                                               |     |  |     |  |     |  |     |  |     |  |     |  |
|-------------------------------------------------------------------------------------------------------------------------------------------------------------------------------|-----|--|-----|--|-----|--|-----|--|-----|--|-----|--|
| ty and Health Research Unit Experience. Prim Health Care Res Dev. 2019;20:e139.                                                                                               |     |  |     |  |     |  |     |  |     |  |     |  |
| Jessup RL, O'Connor DA, Putrik P, et al. Alternative service models for delivery of healthcare services in high-income countries: a scoping review of systematic reviews. BMJ | Yes |  |



1  
2  
3  
4  
5  
6  
7  
8  
9  
10  
11  
12  
13  
14  
15  
16  
17  
18  
19  
20  
21  
22  
23  
24  
25  
26  
27  
28  
29  
30  
31  
32  
33  
34  
35  
36  
37  
38  
39  
40  
41  
42  
43  
44  
45  
46  
47

|                                                                                                                                                                                                                                                                                                  |     |                                                      |     |                        |     |                                |     |  |     |                                  |     |                              |
|--------------------------------------------------------------------------------------------------------------------------------------------------------------------------------------------------------------------------------------------------------------------------------------------------|-----|------------------------------------------------------|-----|------------------------|-----|--------------------------------|-----|--|-----|----------------------------------|-----|------------------------------|
| open.<br>2019;9(1):<br>e024385.                                                                                                                                                                                                                                                                  |     |                                                      |     |                        |     |                                |     |  |     |                                  |     |                              |
| Vainieri<br>M, Noto<br>G, Ferre<br>F, Rosella<br>LC. A<br>Performan<br>ce<br>Managem<br>ent<br>System in<br>Healthcar<br>e for All<br>Seasons?<br>Internatio<br>nal<br>Journal of<br>Environm<br>ental<br>Research<br>& Public<br>Health<br>[Electroni<br>c<br>Resource]<br>. 2020;17(1<br>5):03 | Yes | all authors<br>from<br>reputable<br>institution<br>s | Yes |                        | Yes | Explicitly<br>mentions<br>bias | Yes |  | Yes | recent<br>references<br>included | Yes |                              |
| Braithwait<br>e J,<br>Mannion                                                                                                                                                                                                                                                                    | Yes | all authors<br>from<br>reputable                     | Yes | relevant<br>references | Yes | includes<br>informatio         | Yes |  | Yes | recent<br>references<br>included | Yes | adds<br>meaningfu<br>lly and |

For peer review only

1  
2  
3  
4  
5  
6  
7  
8  
9  
10  
11  
12  
13  
14  
15  
16  
17  
18  
19  
20  
21  
22  
23  
24  
25  
26  
27  
28  
29  
30  
31  
32  
33  
34  
35  
36  
37  
38  
39  
40  
41  
42  
43  
44  
45  
46  
47

|                                                                                                                                                                                                                                                               |  |                                                        |  |  |  |                           |  |  |  |  |  |  |  |  |  |                                    |
|---------------------------------------------------------------------------------------------------------------------------------------------------------------------------------------------------------------------------------------------------------------|--|--------------------------------------------------------|--|--|--|---------------------------|--|--|--|--|--|--|--|--|--|------------------------------------|
| <p>R, Matsuyama Y, et al. The future of health systems to 2030: a roadmap for global progress and sustainability. International journal for quality in health care: journal of the International Society for Quality in Health Care. 2018;30(10):823-831.</p> |  | <p>institutions and published extensively in field</p> |  |  |  | <p>n on 152 countries</p> |  |  |  |  |  |  |  |  |  | <p>enriches current literature</p> |
|---------------------------------------------------------------------------------------------------------------------------------------------------------------------------------------------------------------------------------------------------------------|--|--------------------------------------------------------|--|--|--|---------------------------|--|--|--|--|--|--|--|--|--|------------------------------------|

For peer review only

1  
2  
3  
4  
5  
6  
7  
8  
9  
10  
11  
12  
13  
14  
15  
16  
17  
18  
19  
20  
21  
22  
23  
24  
25  
26  
27  
28  
29  
30  
31  
32  
33  
34  
35  
36  
37  
38  
39  
40  
41  
42  
43  
44  
45  
46  
47

|                                                                                                                                                                                                                                                       |     |                                         |     |  |     |  |     |                                              |     |                            |     |  |
|-------------------------------------------------------------------------------------------------------------------------------------------------------------------------------------------------------------------------------------------------------|-----|-----------------------------------------|-----|--|-----|--|-----|----------------------------------------------|-----|----------------------------|-----|--|
| Buttigieg SC. Innovation Strategies and Health System Guiding Principles to Address Equity and Sustainability in Responsible Innovation in Health Comment on "What Health System Challenges Should Responsible Innovation in Health Address? Insights | Yes | all authors from reputable institutions | Yes |  | Yes |  | Yes | notes need to address contextual differences | Yes | recent references included | Yes |  |
|-------------------------------------------------------------------------------------------------------------------------------------------------------------------------------------------------------------------------------------------------------|-----|-----------------------------------------|-----|--|-----|--|-----|----------------------------------------------|-----|----------------------------|-----|--|

For peer review only

1  
2  
3  
4  
5  
6  
7  
8  
9  
10  
11  
12  
13  
14  
15  
16  
17  
18  
19  
20  
21  
22  
23  
24  
25  
26  
27  
28  
29  
30  
31  
32  
33  
34  
35  
36  
37  
38  
39  
40  
41  
42  
43  
44  
45  
46  
47

|                                                                                                                                                                                                           |     |                                                   |     |                            |     |                                 |     |                     |     |                                           |     |                                                   |
|-----------------------------------------------------------------------------------------------------------------------------------------------------------------------------------------------------------|-----|---------------------------------------------------|-----|----------------------------|-----|---------------------------------|-----|---------------------|-----|-------------------------------------------|-----|---------------------------------------------------|
| From an International Scoping Review". Int. 2019;8(9): 570-572                                                                                                                                            |     |                                                   |     |                            |     |                                 |     |                     |     |                                           |     |                                                   |
| Byskov J, Maluka S, Marchal B, et al. A systems perspective on the importance of global health strategy developments for accomplishing today's Sustainable Development Goals. Health policy and planning. | Yes | all authors from reputable institutions worldwide | Yes | aim clearly stated and met | Yes | coverage based on aim being met | Yes | balanced standpoint | Yes | relevant contemporary references included | Yes | brings suggested ways forward to achieve the SDGs |

1  
2  
3  
4  
5  
6  
7  
8  
9  
10  
11  
12  
13  
14  
15  
16  
17  
18  
19  
20  
21  
22  
23  
24  
25  
26  
27  
28  
29  
30  
31  
32  
33  
34  
35  
36  
37  
38  
39  
40  
41  
42  
43  
44  
45  
46  
47

|                                                                                                                                                                                                                             |     |                                                            |     |                                         |     |                                           |     |                                                                                            |     |                                  |     |                        |
|-----------------------------------------------------------------------------------------------------------------------------------------------------------------------------------------------------------------------------|-----|------------------------------------------------------------|-----|-----------------------------------------|-----|-------------------------------------------|-----|--------------------------------------------------------------------------------------------|-----|----------------------------------|-----|------------------------|
| 2019;34(9):635-645.                                                                                                                                                                                                         |     |                                                            |     |                                         |     |                                           |     |                                                                                            |     |                                  |     |                        |
| O'Brien N, Li R, Isaranuwatchai W, et al. How can we make better health decisions a Best Buy for all?: Commentary based on discussions at iDSI roundtable on 2 (nd) May 2019 London, UK. Gates open research. 2019;3:15-43. | Yes | all authors from reputable colleges, peer reviewed article | Yes | peer reviewed, authoritative references | Yes | covers health technology assessment (HTA) | Yes | bias not explicitly stated but balanced standpoint with WHO and country and local evidence | Yes | contemporary references included | Yes | adds to the literature |
| Hanney S, Kanya L, Pokhrel S,                                                                                                                                                                                               | Yes | WHO authority, as well as                                  | Yes | authoritative, clear aim met            | Yes | scoping review parameters                 | Yes | bias not explicitly stated but                                                             | Yes | Contemporary                     | Yes | Has considerations for |

1  
2  
3  
4  
5  
6  
7  
8  
9  
10  
11  
12  
13  
14  
15  
16  
17  
18  
19  
20  
21  
22  
23  
24  
25  
26  
27  
28  
29  
30  
31  
32  
33  
34  
35  
36  
37  
38  
39  
40  
41  
42  
43  
44  
45  
46  
47

|                                                                                                                                                                                                                                                                                                                                                                                                                                     |  |                               |  |  |  |                         |  |  |                                                                                            |  |                                |  |                                                      |
|-------------------------------------------------------------------------------------------------------------------------------------------------------------------------------------------------------------------------------------------------------------------------------------------------------------------------------------------------------------------------------------------------------------------------------------|--|-------------------------------|--|--|--|-------------------------|--|--|--------------------------------------------------------------------------------------------|--|--------------------------------|--|------------------------------------------------------|
| <p>Jones T,<br/>Boaz A.<br/>WHO<br/>Health<br/>Evidence<br/>Network<br/>Synthesis<br/>Reports.<br/>What is<br/>the<br/>evidence<br/>on<br/>policies,<br/>interventi<br/>ons and<br/>tools for<br/>establishi<br/>ng and/or<br/>strengthen<br/>ing<br/>national<br/>health<br/>research<br/>systems<br/>and their<br/>effectiven<br/>ess?<br/>Copenhag<br/>en: WHO<br/>Regional<br/>Office for<br/>Europe ©<br/>World<br/>Health</p> |  | <p>individual<br/>authors</p> |  |  |  | <p>well<br/>defined</p> |  |  | <p>balanced<br/>standpoint<br/>with<br/>WHO and<br/>country<br/>and local<br/>evidence</p> |  | <p>references<br/>included</p> |  | <p>policy<br/>analysis in<br/>many<br/>countries</p> |
|-------------------------------------------------------------------------------------------------------------------------------------------------------------------------------------------------------------------------------------------------------------------------------------------------------------------------------------------------------------------------------------------------------------------------------------|--|-------------------------------|--|--|--|-------------------------|--|--|--------------------------------------------------------------------------------------------|--|--------------------------------|--|------------------------------------------------------|

For peer review only

1  
2  
3  
4  
5  
6  
7  
8  
9  
10  
11  
12  
13  
14  
15  
16  
17  
18  
19  
20  
21  
22  
23  
24  
25  
26  
27  
28  
29  
30  
31  
32  
33  
34  
35  
36  
37  
38  
39  
40  
41  
42  
43  
44  
45  
46  
47

|                                                                                                                                                                                                                                                |     |                                     |     |                                                         |     |                                             |     |                                                                  |     |                                                    |     |                                      |
|------------------------------------------------------------------------------------------------------------------------------------------------------------------------------------------------------------------------------------------------|-----|-------------------------------------|-----|---------------------------------------------------------|-----|---------------------------------------------|-----|------------------------------------------------------------------|-----|----------------------------------------------------|-----|--------------------------------------|
| Organizational 2020.; 2020                                                                                                                                                                                                                     |     |                                     |     |                                                         |     |                                             |     |                                                                  |     |                                                    |     |                                      |
| Braithwaite J, Vincent C, Nicklin W, Amalberti R. Coping with more people with more illness. Part 2: new generation of standards for enabling healthcare system transformation and sustainability. International Journal for Quality in Health | Yes | well published authors in the field | Yes | authoritative references in the field, aim strategy met | Yes | global, but strategy for ISQua well defined | Yes | balanced standpoint, evidence from sources from around the world | Yes | context well defined, contemporary references used | Yes | important paper adding to literature |

For peer review only

|                                                                                                                                                                                                                                             |     |                                     |     |                          |     |                                  |     |                                                |     |                                                            |     |                                         |
|---------------------------------------------------------------------------------------------------------------------------------------------------------------------------------------------------------------------------------------------|-----|-------------------------------------|-----|--------------------------|-----|----------------------------------|-----|------------------------------------------------|-----|------------------------------------------------------------|-----|-----------------------------------------|
| Care. 2019;31(2):159-163                                                                                                                                                                                                                    |     |                                     |     |                          |     |                                  |     |                                                |     |                                                            |     |                                         |
| Braithwaite J, Zurynski Y, Ludlow K, Holt J, Augustsson H, Campbell M. Towards sustainable healthcare system performance in the 21st century in high-income countries: a protocol for a systematic review of the grey literature. BMJ open. | Yes | well published authors in the field | Yes | authoritative references | Yes | global but well defined protocol | Yes | balanced standpoint, bias explicitly addressed | Yes | date to be used well defined, contemporary references used | Yes | significant and important for the field |

For peer review only

1  
2  
3  
4  
5  
6  
7  
8  
9  
10  
11  
12  
13  
14  
15  
16  
17  
18  
19  
20  
21  
22  
23  
24  
25  
26  
27  
28  
29  
30  
31  
32  
33  
34  
35  
36  
37  
38  
39  
40  
41  
42  
43  
44  
45  
46  
47



1  
2  
3  
4  
5  
6  
7  
8  
9  
10  
11  
12  
13  
14  
15  
16  
17  
18  
19  
20  
21  
22  
23  
24  
25  
26  
27  
28  
29  
30  
31  
32  
33  
34  
35  
36  
37  
38  
39  
40  
41  
42  
43  
44  
45  
46  
47

|                                                                                                                                                                                                                                               |     |                       |     |                          |     |                       |     |                     |     |                                  |     |                                 |
|-----------------------------------------------------------------------------------------------------------------------------------------------------------------------------------------------------------------------------------------------|-----|-----------------------|-----|--------------------------|-----|-----------------------|-----|---------------------|-----|----------------------------------|-----|---------------------------------|
| 2019;9(1):<br>e025892                                                                                                                                                                                                                         |     |                       |     |                          |     |                       |     |                     |     |                                  |     |                                 |
| Martiniuk AL, Colbran R, Ramsden R, et al. Capability ... what's in a word? Rural Doctors Network of New South Wales Australia is shifting to focus on the capability of rural health professionals. Rural and remote health. 2020;20(3):5633 | Yes | authoritative authors | Yes | authoritative references | Yes | coverage well defined | Yes | balanced standpoint | Yes | contemporary references included | Yes | important and adds to the field |
| Rudnicka E,                                                                                                                                                                                                                                   | Yes | peer reviewed         | Yes | Peer-reviewed            | Yes | aimed to coverage     | Yes | Authors standpoint  | Yes |                                  | Yes |                                 |

For peer review only

|                                                                                                                                                 |                                                                                                                                                                            |     |                                                                  |     |               |     |                                    |     |                                             |     |                                                                         |     |  |
|-------------------------------------------------------------------------------------------------------------------------------------------------|----------------------------------------------------------------------------------------------------------------------------------------------------------------------------|-----|------------------------------------------------------------------|-----|---------------|-----|------------------------------------|-----|---------------------------------------------|-----|-------------------------------------------------------------------------|-----|--|
| 1<br>2<br>3<br>4<br>5<br>6<br>7<br>8<br>9<br>10<br>11<br>12<br>13<br>14<br>15<br>16<br>17<br>18<br>19<br>20<br>21<br>22<br>23<br>24<br>25<br>26 | Napierała P,<br>Podfigurna A,<br>Męczekalski B,<br>Smolarczyk R,<br>Grymowicz M. The World Health Organization (WHO) approach to healthy ageing. Maturitas. 2020;139:6-11. |     | journal article                                                  |     |               |     | global perspective and achieved it |     | is clear, relatively balance presentation   |     |                                                                         |     |  |
| 27<br>28<br>29<br>30<br>31<br>32<br>33<br>34<br>35<br>36<br>37<br>38                                                                            | Walsh K. Strengthening primary care: the role of e-learning. Educ. 2019;30(5):267-269.                                                                                     | Yes | Author has a strong publication record in peer reviewed journals | Yes | peer reviewed | Yes |                                    | Yes | no bias stated but is a balanced commentary | Yes | contemporary references included, date is discernible by subject matter | Yes |  |
| 39<br>40<br>41<br>42<br>43<br>44<br>45<br>46<br>47                                                                                              | De Santis M.                                                                                                                                                               | Yes | Authors both                                                     | Yes | peer reviewed | Yes | Looking at studies                 | Yes | No bias stated,                             | Yes | recent references                                                       | Yes |  |

1  
2  
3  
4  
5  
6  
7  
8  
9  
10  
11  
12  
13  
14  
15  
16  
17  
18  
19  
20  
21  
22  
23  
24  
25  
26  
27  
28  
29  
30  
31  
32  
33  
34  
35  
36  
37  
38  
39  
40  
41  
42  
43  
44  
45  
46  
47

|                                                                                                                                                     |     |                                                                                               |     |                                                           |     |                                                                                       |     |                                     |     |                                                    |     |  |
|-----------------------------------------------------------------------------------------------------------------------------------------------------|-----|-----------------------------------------------------------------------------------------------|-----|-----------------------------------------------------------|-----|---------------------------------------------------------------------------------------|-----|-------------------------------------|-----|----------------------------------------------------|-----|--|
| Integrated care for healthcare sustainability for patients living with rare diseases. Annali dell'Istituto superiore di sanita. 2019;55(3):276-282. |     | appear to have roles in prominent rare disease organisations in Europe                        |     |                                                           |     | published between 2000 and 2018. Search terms provided, both grey lit and PR included |     | standpoint is clear                 |     | included, date is discernible                      |     |  |
| Ferrelli RM, Fantini B, Taruscio D. Health systems sustainability for rare diseases. Preface. Annali dell'Istituto superiore di sanita.             | Yes | Authors either work for rare diseases network in Europe or in the ministry of health in Italy | Yes | Book chapter-editors are all from reputable organisations | Yes | Europe specific with focus on rare diseases                                           | Yes | No bias stated, standpoint is clear | Yes | Contemporary references, the context is very clear | Yes |  |

|                                                                                                                                                                                                                                      |     |                                                |     |                               |     |                                                                                                 |     |                                                                        |     |                                                                           |     |                              |
|--------------------------------------------------------------------------------------------------------------------------------------------------------------------------------------------------------------------------------------|-----|------------------------------------------------|-----|-------------------------------|-----|-------------------------------------------------------------------------------------------------|-----|------------------------------------------------------------------------|-----|---------------------------------------------------------------------------|-----|------------------------------|
| 2019;55(3):249-250.                                                                                                                                                                                                                  |     |                                                |     |                               |     |                                                                                                 |     |                                                                        |     |                                                                           |     |                              |
| Steenhuis S, Struijs J, Koolman X, Ket J, E VDH. Unraveling the Complexity in the Design and Implementation of Bundled Payments: A Scoping Review of Key Elements From a Payer's Perspective. Milbank Quarterly. 2020;98(1):197-222. | Yes | Authors have peer reviewed publication history | Yes | Aim stated, clear methodology | Yes | Limits stated in the methodology- review related to payment methods, relevant to OECD countries | Yes | Authors address risk of bias, there is a balanced standpoint presented | Yes | Contemporary references included, date is discernible throughout the text | Yes |                              |
| Nikolić B. Applicability of                                                                                                                                                                                                          | Yes | contemporary references,                       | Yes | aim clearly                   | Yes | clear coverage within EU                                                                        | Yes | authors opinion is balanced                                            | Yes | context clear, contempor                                                  | Yes | important article that helps |

1  
2  
3  
4  
5  
6  
7  
8  
9  
10  
11  
12  
13  
14  
15  
16  
17  
18  
19  
20  
21  
22  
23  
24  
25  
26  
27  
28  
29  
30  
31  
32  
33  
34  
35  
36  
37  
38  
39  
40  
41  
42  
43  
44  
45  
46  
47

|                                                                                                                                                                           |     |                                               |     |                                             |     |                                                    |     |                                                      |     |                                                                                                      |     |                                              |
|---------------------------------------------------------------------------------------------------------------------------------------------------------------------------|-----|-----------------------------------------------|-----|---------------------------------------------|-----|----------------------------------------------------|-----|------------------------------------------------------|-----|------------------------------------------------------------------------------------------------------|-----|----------------------------------------------|
| European Union Competition Law to Health Care Providers: The Dividing Line between Economic and Noneconomic Activities. Journal of health politics, policy and law. 2020. |     | author from reputable source                  |     | stated and met                              |     |                                                    |     | by contemporary references and different standpoints |     | ary references present                                                                               |     | make the legal uncertainty clear             |
| Niraula S. Strategizing health technology assessment for containment of cancer drug costs in a                                                                            | Yes | authoritative author, detailed reference list | Yes | clearly stated brief, peer reviewed article | Yes | coverage specific to Canadian oncology drug review | Yes | balanced standpoint                                  | Yes | universal health care system in Canada since 1968, and has been deduced with contemporary references | Yes | adds context, important yet specific article |

|                                                                                                                                                                            |                                                                                                                                      |     |                              |     |                                                  |     |                                                  |     |                                                  |     |                                   |     |                                                                     |
|----------------------------------------------------------------------------------------------------------------------------------------------------------------------------|--------------------------------------------------------------------------------------------------------------------------------------|-----|------------------------------|-----|--------------------------------------------------|-----|--------------------------------------------------|-----|--------------------------------------------------|-----|-----------------------------------|-----|---------------------------------------------------------------------|
| 1<br>2<br>3<br>4<br>5<br>6<br>7<br>8<br>9<br>10<br>11<br>12<br>13<br>14<br>15<br>16<br>17<br>18                                                                            | universal health care system: Case of the pan-Canadian Oncology Drug Review. Cancer. 2019;125(18):3100-3103.                         |     |                              |     |                                                  |     |                                                  |     |                                                  |     |                                   |     |                                                                     |
| 19<br>20<br>21<br>22<br>23<br>24<br>25<br>26<br>27<br>28<br>29<br>30<br>31<br>32<br>33<br>34<br>35<br>36<br>37<br>38<br>39<br>40<br>41<br>42<br>43<br>44<br>45<br>46<br>47 | Wurcel V, Cicchetti A, Garrison L, et al. The Value of Diagnostic Information in Personalised Healthcare: A Comprehensive Concept to | Yes | authors experts in the field | Yes | peer-reviewed article, clear aim and methodology | Yes | coverage specific to the VODI published articles | Yes | balanced standpoint with examples and references | Yes | contemporary references included, | Yes | important addition regarding value of diagnostic information (VODI) |

1  
2  
3  
4  
5  
6  
7  
8  
9  
10  
11  
12  
13  
14  
15  
16  
17  
18  
19  
20  
21  
22  
23  
24  
25  
26  
27  
28  
29  
30  
31  
32  
33  
34  
35  
36  
37  
38  
39  
40  
41  
42  
43  
44  
45  
46  
47

|                                                                                                                                                        |     |                                                         |     |                                                                                |     |                                           |     |                     |     |                                                   |     |                                       |
|--------------------------------------------------------------------------------------------------------------------------------------------------------|-----|---------------------------------------------------------|-----|--------------------------------------------------------------------------------|-----|-------------------------------------------|-----|---------------------|-----|---------------------------------------------------|-----|---------------------------------------|
| Facilitate Bringing This Technology into Healthcare Systems. Public Health Genomics . 2019;22(1-2):8-15.                                               |     |                                                         |     |                                                                                |     |                                           |     |                     |     |                                                   |     |                                       |
| Cunningham FC, Ranmuthugala G, Westbrook JI, Braithwaite J. Tackling the wicked problem of health networks: the design of an evaluation framework. BMJ | Yes | authors authoritative in field, detailed reference list | Yes | clearly stated aim and methods adhered to. Work is representative of the field | Yes | evaluations of systematic reviews to date | Yes | balanced standpoint | Yes | date discernable, contemporary references present | Yes | meaningful contribution to literature |

|                                                                                                                                                                                                                                                                                                          |     |                                                                        |     |                                      |     |                                                                                                                |     |                                                                                                       |     |                                                                                            |     |                                                                             |
|----------------------------------------------------------------------------------------------------------------------------------------------------------------------------------------------------------------------------------------------------------------------------------------------------------|-----|------------------------------------------------------------------------|-----|--------------------------------------|-----|----------------------------------------------------------------------------------------------------------------|-----|-------------------------------------------------------------------------------------------------------|-----|--------------------------------------------------------------------------------------------|-----|-----------------------------------------------------------------------------|
| open.<br>2019;9(5):<br>e024231.                                                                                                                                                                                                                                                                          |     |                                                                        |     |                                      |     |                                                                                                                |     |                                                                                                       |     |                                                                                            |     |                                                                             |
| Embi PJ,<br>Richesson<br>R,<br>Tenenbau<br>m J, et al.<br>Reimagini<br>ng the<br>research-<br>practice<br>relationshi<br>p: policy<br>recommen<br>dations<br>for<br>informati<br>c<br>s-enabled<br>evidence-<br>generation<br>across the<br>US health<br>system.<br>JAMIA<br>open.<br>2019;2(1):<br>2-9. | Yes | authorativ<br>e authors<br>from well-<br>respected<br>institution<br>s | Yes | clear aim<br>highlighte<br>d and met | Yes | specific to<br>covering<br>what was<br>discussed<br>and the<br>findings<br>from the<br>2016<br>AMIA<br>meeting | Yes | balanced<br>standpoint<br>with<br>contributio<br>ns from<br>over 70<br>participan<br>ts at<br>meeting | Yes | discernabl<br>e from<br>references<br>as well as<br>timing of<br>meeting<br>reported<br>on | Yes | synthesise<br>d findings<br>from<br>meeting<br>and adds<br>to<br>literature |
| Park YL,<br>Canaway<br>R.<br>Integratin<br>g                                                                                                                                                                                                                                                             | Yes | authorativ<br>e authors                                                | Yes | peer<br>reviewed<br>journal          | Yes | limits<br>clearly<br>stated with<br>Western                                                                    | Yes | bias not<br>explicitly<br>stated, but<br>expert<br>balanced                                           | Yes | date<br>discernabl<br>e,<br>contempor<br>ary                                               | Yes | interesting<br>and<br>unique<br>article,                                    |



1  
2  
3  
4  
5  
6  
7  
8  
9  
10  
11  
12  
13  
14  
15  
16  
17  
18  
19  
20  
21  
22  
23  
24  
25  
26  
27  
28  
29  
30  
31  
32  
33  
34  
35  
36  
37  
38  
39  
40  
41  
42  
43  
44  
45  
46  
47

|                                                                                                                                                                                                                                                                 |            |                                                                                                 |            |                                                                                                                                                               |            |                                    |            |                                                                                                                           |            |                                                                                                                                              |            |                                                                                          |
|-----------------------------------------------------------------------------------------------------------------------------------------------------------------------------------------------------------------------------------------------------------------|------------|-------------------------------------------------------------------------------------------------|------------|---------------------------------------------------------------------------------------------------------------------------------------------------------------|------------|------------------------------------|------------|---------------------------------------------------------------------------------------------------------------------------|------------|----------------------------------------------------------------------------------------------------------------------------------------------|------------|------------------------------------------------------------------------------------------|
| <p>Traditiona<br/>l and<br/>Complem<br/>entary<br/>Medicine<br/>with<br/>National<br/>Healthcar<br/>e Systems<br/>for<br/>Universal<br/>Health<br/>Coverage<br/>in Asia<br/>and the<br/>Western<br/>Pacific.<br/>Health<br/>syst.<br/>2019;5(1):<br/>24-31.</p> |            |                                                                                                 |            |                                                                                                                                                               |            | <p>Pacific<br/>region</p>          |            | <p>standpoint<br/>drawing<br/>on<br/>experience<br/>s from<br/>many<br/>countries</p>                                     |            | <p>references<br/>present</p>                                                                                                                |            | <p>adds to the<br/>literature</p>                                                        |
| <p>Quaglio<br/>G,<br/>Figueras<br/>J,<br/>Mantoan<br/>D, et al.<br/>An<br/>overview<br/>of future<br/>EU health<br/>systems.<br/>An insight</p>                                                                                                                 | <p>Yes</p> | <p>Authors<br/>have all<br/>previously<br/>published<br/>extensivel<br/>y in this<br/>field</p> | <p>Yes</p> | <p>Published<br/>in peer<br/>reviewed<br/>journal.<br/>Aim isn't<br/>explicitly<br/>presented,<br/>but article<br/>is<br/>referencin<br/>g/<br/>reporting</p> | <p>Yes</p> | <p>EU<br/>specific<br/>context</p> | <p>Yes</p> | <p>Author<br/>bias isn't<br/>stated, but<br/>discussion<br/>presents<br/>clear<br/>standpoint<br/>and is<br/>balanced</p> | <p>Yes</p> | <p>Reference<br/>s<br/>workshop<br/>in 2017<br/>that<br/>inspired<br/>the<br/>publicatio<br/>n,<br/>references<br/>recent<br/>literature</p> | <p>Yes</p> | <p>Contribute<br/>s<br/>meaningfu<br/>lly to<br/>discussion<br/>of HSS in<br/>the EU</p> |

|                                                                                                                                                                            |                                                                                                                                                                                                                 |     |                                                                          |                                         |                                                                                                                                                                |     |                                                                                                     |     |                                                                                                  |     |                                                           |     |                                                                                                                               |
|----------------------------------------------------------------------------------------------------------------------------------------------------------------------------|-----------------------------------------------------------------------------------------------------------------------------------------------------------------------------------------------------------------|-----|--------------------------------------------------------------------------|-----------------------------------------|----------------------------------------------------------------------------------------------------------------------------------------------------------------|-----|-----------------------------------------------------------------------------------------------------|-----|--------------------------------------------------------------------------------------------------|-----|-----------------------------------------------------------|-----|-------------------------------------------------------------------------------------------------------------------------------|
| 1<br>2<br>3<br>4<br>5<br>6<br>7<br>8<br>9<br>10<br>11<br>12<br>13<br>14<br>15<br>16<br>17<br>18                                                                            | into governanc<br>e, primary<br>care, data<br>collection<br>and<br>citizens'<br>participati<br>on.<br>Journal of<br>public<br>health<br>(Oxford,<br>England)                                                    |     |                                                                          | on<br>workshop<br>held in<br>parliament |                                                                                                                                                                |     |                                                                                                     |     |                                                                                                  |     |                                                           |     |                                                                                                                               |
| 19<br>20<br>21<br>22<br>23<br>24<br>25<br>26<br>27<br>28<br>29<br>30<br>31<br>32<br>33<br>34<br>35<br>36<br>37<br>38<br>39<br>40<br>41<br>42<br>43<br>44<br>45<br>46<br>47 | Lehoux P,<br>Roncarolo<br>F, Silva<br>HP,<br>Boivin A,<br>Denis JL,<br>Hebert R.<br>What<br>Health<br>System<br>Challenge<br>s Should<br>Responsib<br>le<br>Innovatio<br>n in<br>Health<br>Address?<br>Insights | Yes | Authors<br>have<br>strong<br>publicatio<br>n record in<br>PR<br>journals | Yes                                     | aim stated,<br>methods<br>clearly<br>stated,<br>published<br>in PR<br>journal<br>aim stated,<br>methods<br>clearly<br>stated,<br>published<br>in PR<br>journal | Yes | internation<br>al scoping<br>review<br>with well<br>defined<br>parameters<br>and search<br>strategy | Yes | Bias isn't<br>stated but<br>limitations<br>of review<br>are, and<br>standpoint<br>is<br>balanced | Yes | Articles<br>included<br>for review<br>span 2000-<br>2016. | Yes | Very<br>detailed<br>scoping<br>review,<br>identifies<br>a number<br>of<br>challenges<br>facing<br>global<br>health<br>systems |

1  
2  
3  
4  
5  
6  
7  
8  
9  
10  
11  
12  
13  
14  
15  
16  
17  
18  
19  
20  
21  
22  
23  
24  
25  
26  
27  
28  
29  
30  
31  
32  
33  
34  
35  
36  
37  
38  
39  
40  
41  
42  
43  
44  
45  
46  
47

|                                                                                                                                            |     |                                                                                             |     |                                                                                        |     |                                                                |     |                                                 |     |                                                            |     |                                                                                                                             |
|--------------------------------------------------------------------------------------------------------------------------------------------|-----|---------------------------------------------------------------------------------------------|-----|----------------------------------------------------------------------------------------|-----|----------------------------------------------------------------|-----|-------------------------------------------------|-----|------------------------------------------------------------|-----|-----------------------------------------------------------------------------------------------------------------------------|
| From an International Scoping Review. Int. 2019;8(2): 63-75.                                                                               |     |                                                                                             |     |                                                                                        |     |                                                                |     |                                                 |     |                                                            |     |                                                                                                                             |
| Editorial. Healthcare quarterly (Toronto, Ont.). 2020;22(4)                                                                                |     | Authors not stated- editors of Healthcare Quarterly- a                                      |     | Commentary- no aim or methods                                                          | Yes | Canada specific                                                | Yes | Standpoint clear                                | Yes | Context is identifiable because of contemporary references |     |                                                                                                                             |
| Abimbola S, Baatiema L, Bigdeli M. The impacts of decentralization on health system equity, efficiency and resilience: a realist synthesis | Yes | Authors from reputable institutions with good publication records in peer reviewed journals | Yes | clear methodology/ search strategy. In peer reviewed journal. No aim explicitly stated | Yes | wide coverage- looking at low/middle and high income countries | Yes | Author bias not stated, but balanced standpoint | Yes | context of article identified                              | Yes | identified three mechanisms by which decentralization may influence equity, efficiency, and resilience in 25 countries (low |

|                                                                                                                                                                   |     |                                              |     |                                                                   |     |                                         |     |                                               |     |                                                                                            |     |                            |
|-------------------------------------------------------------------------------------------------------------------------------------------------------------------|-----|----------------------------------------------|-----|-------------------------------------------------------------------|-----|-----------------------------------------|-----|-----------------------------------------------|-----|--------------------------------------------------------------------------------------------|-----|----------------------------|
| of the evidence. Health Policy & Planning. 2019;34(8):605-617                                                                                                     |     |                                              |     |                                                                   |     |                                         |     |                                               |     |                                                                                            |     | middle and high income)    |
| Craig N, Robinson M. Towards a preventative approach to improving health and reducing health inequalities: a view from Scotland. Public health. 2019;169:195-200. | Yes | Both authors affiliated with the NHS         | Yes | no aims or method stated but is peer reviewed and well referenced | Yes | Scotland specific                       | Yes | Author bias not stated but viewpoint is clear | Yes | Context easy to discern based on references and analysis of trends in previous 10-15 years | Yes | Useful in Scottish context |
| Costa-Font J, Levaggi R. Innovation, aging,                                                                                                                       | Yes | Both authors have strong publication history | Yes | Peer reviewed, no aim or method stated                            | Yes | special issue presents papers presented | Yes | There isn't a bias stated                     | Yes | discernable from references                                                                | Yes |                            |

1  
2  
3  
4  
5  
6  
7  
8  
9  
10  
11  
12  
13  
14  
15  
16  
17  
18  
19  
20  
21  
22  
23  
24  
25  
26  
27  
28  
29  
30  
31  
32  
33  
34  
35  
36  
37  
38  
39  
40  
41  
42  
43  
44  
45  
46  
47

|                                                                                                                                                                                                                              |     |                                                                                                                |     |                                               |     |                                                |     |                                           |     |                               |     |  |
|------------------------------------------------------------------------------------------------------------------------------------------------------------------------------------------------------------------------------|-----|----------------------------------------------------------------------------------------------------------------|-----|-----------------------------------------------|-----|------------------------------------------------|-----|-------------------------------------------|-----|-------------------------------|-----|--|
| and health care:<br>Unravelin<br>g "silver"<br>from<br>"red"<br>herrings?<br>Health<br>Econ.<br>2020;29<br>Suppl 1:3-<br>7.                                                                                                  |     | and are<br>associated<br>with<br>reputable<br>institution<br>s.<br>Published<br>in peer<br>reviewed<br>journal |     |                                               |     | at a<br>workshop                               |     |                                           |     |                               |     |  |
| Derakhsh<br>ani N,<br>Doshman<br>gir L,<br>Ahmadi<br>A, Fakhri<br>A,<br>Sadeghi-<br>Bazargani<br>H,<br>Gordeev<br>VS.<br>Monitorin<br>g Process<br>Barriers<br>and<br>Enablers<br>Towards<br>Universal<br>Health<br>Coverage | Yes | Authors<br>have<br>strong<br>publicatio<br>n history                                                           | Yes | detailed<br>methods<br>and search<br>strategy | Yes | parameters<br>defined in<br>search<br>strategy | Yes | bias not<br>stated,<br>viewpoint<br>clear | Yes | context is<br>discernabl<br>e | Yes |  |

1  
2  
3  
4  
5  
6  
7  
8  
9  
10  
11  
12  
13  
14  
15  
16  
17  
18  
19  
20  
21  
22  
23  
24  
25  
26  
27  
28  
29  
30  
31  
32  
33  
34  
35  
36  
37  
38  
39  
40  
41  
42  
43  
44  
45  
46  
47

|                                                                                                                                                           |  |                                                         |            |                                 |            |                         |  |  |            |                                               |  |  |
|-----------------------------------------------------------------------------------------------------------------------------------------------------------|--|---------------------------------------------------------|------------|---------------------------------|------------|-------------------------|--|--|------------|-----------------------------------------------|--|--|
| <p>Within the Sustainable Development Goals: A Systematic Review and Content Analysis. ClinicoEconomics and outcomes research : CEOR. 2020;12:459-472</p> |  |                                                         |            |                                 |            |                         |  |  |            |                                               |  |  |
| <p>Clancy C. Creating World-Class Care and Service for Our Nation's Finest: How Veterans Health Administration</p>                                        |  | <p>Author affiliated with VA, no publication record</p> | <p>Yes</p> | <p>in peer reviewed journal</p> | <p>Yes</p> | <p>restricted to VA</p> |  |  | <p>Yes</p> | <p>date and context discernable from text</p> |  |  |

1  
2  
3  
4  
5  
6  
7  
8  
9  
10  
11  
12  
13  
14  
15  
16  
17  
18  
19  
20  
21  
22  
23  
24  
25  
26  
27  
28  
29  
30  
31  
32  
33  
34  
35  
36  
37  
38  
39  
40  
41  
42  
43  
44  
45  
46  
47

|                                                                                                                        |     |                                        |     |               |     |                                                                                            |     |                                                        |     |                                    |     |  |
|------------------------------------------------------------------------------------------------------------------------|-----|----------------------------------------|-----|---------------|-----|--------------------------------------------------------------------------------------------|-----|--------------------------------------------------------|-----|------------------------------------|-----|--|
| Diffusion of Excellence Initiative Is Innovating and Transforming Veterans Affairs Health Care. Perm. 2019;23          |     |                                        |     |               |     |                                                                                            |     |                                                        |     |                                    |     |  |
| Marcotte LM, Moriates C, Wolfson DB, Frankel RM. Professionalism as the Bedrock of High-Value Care. Academic Medicine. | Yes | authors have strong publication record | Yes | peer reviewed | Yes | No limits stated, but is restricted to looking at healthcare professionals (in US context) | Yes | bias not explicitly stated, but standpoint is balanced | Yes | date/context discernable from text | Yes |  |

|                                                                                                                                                                                                                          |     |                                             |     |                                                |     |                                                                                     |     |                                                                     |     |                                     |     |                                           |
|--------------------------------------------------------------------------------------------------------------------------------------------------------------------------------------------------------------------------|-----|---------------------------------------------|-----|------------------------------------------------|-----|-------------------------------------------------------------------------------------|-----|---------------------------------------------------------------------|-----|-------------------------------------|-----|-------------------------------------------|
| 2020;95(6):864-867.                                                                                                                                                                                                      |     |                                             |     |                                                |     |                                                                                     |     |                                                                     |     |                                     |     |                                           |
| Witter S, Palmer N, Balabano va D, et al. Health system strengthening- Reflections on its meaning, assessment, and our state of knowledge. International Journal of Health Planning & Management. 2019;34(4):e1980-e1989 | Yes | authors have strong publication record      | Yes | peer reviewed, but there is no aims or methods | Yes | Looked at studies published between 2000 and 2018 focussed on interventions in LMIC | Yes | acknowledgement of biases and limitations; well balanced standpoint | Yes | context discernable from references | Yes | contributes to the literature             |
| Sturmberg JP. Resilience for health-                                                                                                                                                                                     | Yes | author has publication record in this field | Yes | peer reviewed, but there is no aims or methods |     | limits not stated                                                                   |     | no bias stated                                                      |     | no discernable date                 | Yes | contributes to conversation around health |

For peer review only

1  
2  
3  
4  
5  
6  
7  
8  
9  
10  
11  
12  
13  
14  
15  
16  
17  
18  
19  
20  
21  
22  
23  
24  
25  
26  
27  
28  
29  
30  
31  
32  
33  
34  
35  
36  
37  
38  
39  
40  
41  
42  
43  
44  
45  
46  
47



1  
2  
3  
4  
5  
6  
7  
8  
9  
10  
11  
12  
13  
14  
15  
16  
17  
18  
19  
20  
21  
22  
23  
24  
25  
26  
27  
28  
29  
30  
31  
32  
33  
34  
35  
36  
37  
38  
39  
40  
41  
42  
43  
44  
45  
46  
47

|                                                                                                                                                                 |            |                                            |            |                      |            |                                                            |            |                                                               |            |                                                                                        |            |                          |
|-----------------------------------------------------------------------------------------------------------------------------------------------------------------|------------|--------------------------------------------|------------|----------------------|------------|------------------------------------------------------------|------------|---------------------------------------------------------------|------------|----------------------------------------------------------------------------------------|------------|--------------------------|
| <p>an emergent property of the "health systems as a whole". Journal of evaluation in clinical practice. 2018;24(6):1323-1329.</p>                               |            |                                            |            |                      |            |                                                            |            |                                                               |            |                                                                                        |            | <p>system resilience</p> |
| <p>Thistlethwaite JE, Dunston R, Yassine T. The times are changing: workforce planning, new health-care models and the need for interprofessional education</p> | <p>Yes</p> | <p>authors from reputable institutions</p> | <p>Yes</p> | <p>peer reviewed</p> | <p>Yes</p> | <p>Specific to Australia/ the Australian health system</p> | <p>Yes</p> | <p>bias not explicitly stated, but standpoint is balanced</p> | <p>Yes</p> | <p>references contemporary reports about Aus health system. Context is discernable</p> | <p>Yes</p> |                          |

|                                                                                                                                                                                                                |                                                                                                                                                                                                                   |     |                                                 |     |                                                                                                               |     |                                                          |     |                        |     |                                                                                                                |     |                                     |
|----------------------------------------------------------------------------------------------------------------------------------------------------------------------------------------------------------------|-------------------------------------------------------------------------------------------------------------------------------------------------------------------------------------------------------------------|-----|-------------------------------------------------|-----|---------------------------------------------------------------------------------------------------------------|-----|----------------------------------------------------------|-----|------------------------|-----|----------------------------------------------------------------------------------------------------------------|-----|-------------------------------------|
| 1<br>2<br>3<br>4<br>5<br>6<br>7<br>8<br>9<br>10<br>11<br>12                                                                                                                                                    | in<br>Australia.<br>Journal of<br>interprofe<br>ssional<br>care.<br>2019;33(4<br>):361-368.                                                                                                                       |     |                                                 |     |                                                                                                               |     |                                                          |     |                        |     |                                                                                                                |     |                                     |
| 13<br>14<br>15<br>16<br>17<br>18<br>19<br>20<br>21<br>22<br>23<br>24<br>25<br>26<br>27<br>28<br>29<br>30<br>31<br>32<br>33<br>34<br>35<br>36<br>37<br>38<br>39<br>40<br>41<br>42<br>43<br>44<br>45<br>46<br>47 | Iskrov G,<br>Stefanov<br>R, Ferrelli<br>RM.<br>Health<br>systems<br>for rare<br>diseases:<br>financial<br>sustainabi<br>lity.<br>Annali<br>dell'Istitut<br>o<br>superiore<br>di sanita.<br>2019;55(3<br>):270-275 | Yes | authors<br>have strong<br>publication<br>record | Yes | No clear<br>aim stated,<br>but there is<br>clear<br>methodolog<br>y and paper<br>has been<br>peer<br>reviewed | Yes | covers<br>health<br>systems in<br>EU<br>member<br>states | Yes | balanced<br>standpoint | Yes | references<br>contempora<br>ry reports<br>about<br>health<br>systems in<br>the EU-<br>context is<br>very clear | Yes | contributes<br>to the<br>literature |

## Preferred Reporting Items for Systematic reviews and Meta-Analyses extension for Scoping Reviews (PRISMA-ScR) Checklist

| SECTION                           | ITEM | PRISMA-ScR CHECKLIST ITEM                                                                                                                                                                                                                                                                                  | REPORTED ON PAGE #                  |
|-----------------------------------|------|------------------------------------------------------------------------------------------------------------------------------------------------------------------------------------------------------------------------------------------------------------------------------------------------------------|-------------------------------------|
| <b>TITLE</b>                      |      |                                                                                                                                                                                                                                                                                                            |                                     |
| Title                             | 1    | Identify the report as a scoping review.                                                                                                                                                                                                                                                                   | 4                                   |
| <b>ABSTRACT</b>                   |      |                                                                                                                                                                                                                                                                                                            |                                     |
| Structured summary                | 2    | Provide a structured summary that includes (as applicable): background, objectives, eligibility criteria, sources of evidence, charting methods, results, and conclusions that relate to the review questions and objectives.                                                                              | 4-5                                 |
| <b>INTRODUCTION</b>               |      |                                                                                                                                                                                                                                                                                                            |                                     |
| Rationale                         | 3    | Describe the rationale for the review in the context of what is already known. Explain why the review questions/objectives lend themselves to a scoping review approach.                                                                                                                                   | 6-7                                 |
| Objectives                        | 4    | Provide an explicit statement of the questions and objectives being addressed with reference to their key elements (e.g., population or participants, concepts, and context) or other relevant key elements used to conceptualize the review questions and/or objectives.                                  | 8                                   |
| <b>METHODS</b>                    |      |                                                                                                                                                                                                                                                                                                            |                                     |
| Protocol and registration         | 5    | Indicate whether a review protocol exists; state if and where it can be accessed (e.g., a Web address); and if available, provide registration information, including the registration number.                                                                                                             | N/A                                 |
| Eligibility criteria              | 6    | Specify characteristics of the sources of evidence used as eligibility criteria (e.g., years considered, language, and publication status), and provide a rationale.                                                                                                                                       | 9-10, methods paragraph 2           |
| Information sources*              | 7    | Describe all information sources in the search (e.g., databases with dates of coverage and contact with authors to identify additional sources), as well as the date the most recent search was executed.                                                                                                  | 10, methods paragraph 3             |
| Search                            | 8    | Present the full electronic search strategy for at least 1 database, including any limits used, such that it could be repeated.                                                                                                                                                                            | 11, methods paragraph 3 and table 2 |
| Selection of sources of evidence† | 9    | State the process for selecting sources of evidence (i.e., screening and eligibility) included in the scoping review.                                                                                                                                                                                      | 10-12                               |
| Data charting process‡            | 10   | Describe the methods of charting data from the included sources of evidence (e.g., calibrated forms or forms that have been tested by the team before their use, and whether data charting was done independently or in duplicate) and any processes for obtaining and confirming data from investigators. | N/A                                 |
| Data items                        | 11   | List and define all variables for which data were sought and any assumptions and simplifications made.                                                                                                                                                                                                     | 10, methods paragraph 5             |
| Critical appraisal of individual  | 12   | If done, provide a rationale for conducting a critical appraisal of included sources of evidence; describe                                                                                                                                                                                                 | 10                                  |

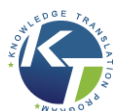

| SECTION                                       | ITEM | PRISMA-ScR CHECKLIST ITEM                                                                                                                                                                       | REPORTED ON PAGE #                                 |
|-----------------------------------------------|------|-------------------------------------------------------------------------------------------------------------------------------------------------------------------------------------------------|----------------------------------------------------|
| sources of evidence§                          |      | the methods used and how this information was used in any data synthesis (if appropriate).                                                                                                      |                                                    |
| Synthesis of results                          | 13   | Describe the methods of handling and summarizing the data that were charted.                                                                                                                    | 11-13, synthesis of results and discussion section |
| <b>RESULTS</b>                                |      |                                                                                                                                                                                                 |                                                    |
| Selection of sources of evidence              | 14   | Give numbers of sources of evidence screened, assessed for eligibility, and included in the review, with reasons for exclusions at each stage, ideally using a flow diagram.                    | 12-13, results paragraph 3                         |
| Characteristics of sources of evidence        | 15   | For each source of evidence, present characteristics for which data were charted and provide the citations.                                                                                     | 12-13, results paragraph 3 and 4                   |
| Critical appraisal within sources of evidence | 16   | If done, present data on critical appraisal of included sources of evidence (see item 12).                                                                                                      | 13                                                 |
| Results of individual sources of evidence     | 17   | For each included source of evidence, present the relevant data that were charted that relate to the review questions and objectives.                                                           | 10-13, results paragraphs 1-4                      |
| Synthesis of results                          | 18   | Summarize and/or present the charting results as they relate to the review questions and objectives.                                                                                            | Pages 13-23                                        |
| <b>DISCUSSION</b>                             |      |                                                                                                                                                                                                 |                                                    |
| Summary of evidence                           | 19   | Summarize the main results (including an overview of concepts, themes, and types of evidence available), link to the review questions and objectives, and consider the relevance to key groups. | 24, paragraph 2                                    |
| Limitations                                   | 20   | Discuss the limitations of the scoping review process.                                                                                                                                          | 5, strengths and limitations paragraph             |
| Conclusions                                   | 21   | Provide a general interpretation of the results with respect to the review questions and objectives, as well as potential implications and/or next steps.                                       | 26, conclusion paragraph                           |
| <b>FUNDING</b>                                |      |                                                                                                                                                                                                 |                                                    |
| Funding                                       | 22   | Describe sources of funding for the included sources of evidence, as well as sources of funding for the scoping review. Describe the role of the funders of the scoping review.                 | 28                                                 |

JBI = Joanna Briggs Institute; PRISMA-ScR = Preferred Reporting Items for Systematic reviews and Meta-Analyses extension for Scoping Reviews.

\* Where *sources of evidence* (see second footnote) are compiled from, such as bibliographic databases, social media platforms, and Web sites.

† A more inclusive/heterogeneous term used to account for the different types of evidence or data sources (e.g., quantitative and/or qualitative research, expert opinion, and policy documents) that may be eligible in a scoping review as opposed to only studies. This is not to be confused with *information sources* (see first footnote).

‡ The frameworks by Arksey and O'Malley (6) and Levac and colleagues (7) and the JBI guidance (4, 5) refer to the process of data extraction in a scoping review as data charting.

§ The process of systematically examining research evidence to assess its validity, results, and relevance before using it to inform a decision. This term is used for items 12 and 19 instead of "risk of bias" (which is more applicable to systematic reviews of interventions) to include and acknowledge the various sources of evidence that may be used in a scoping review (e.g., quantitative and/or qualitative research, expert opinion, and policy document).

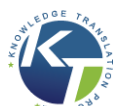

1  
2  
3 From: Tricco AC, Lillie E, Zarin W, O'Brien KK, Colquhoun H, Levac D, et al. PRISMA Extension for Scoping Reviews  
4 (PRISMA ScR): Checklist and Explanation. Ann Intern Med. 2018;169:467–473. doi: [10.7326/M18-0850](https://doi.org/10.7326/M18-0850).  
5  
6  
7  
8  
9  
10  
11  
12  
13  
14  
15  
16  
17  
18  
19  
20  
21  
22  
23  
24  
25  
26  
27  
28  
29  
30  
31  
32  
33  
34  
35  
36  
37  
38  
39  
40  
41  
42  
43  
44  
45  
46  
47  
48  
49  
50  
51  
52  
53  
54  
55  
56  
57

For peer review only

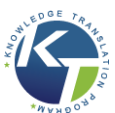

58 **St. Michael's**

59 Inspired Care.  
60 Inspiring Science.

For peer review only - <http://bmjopen.bmj.com/site/about/guidelines.xhtml>

1  
2  
3  
4  
5  
6  
7  
8  
9

## HOW CAN THE HEALTHCARE SYSTEM DELIVER SUSTAINABLE PERFORMANCE? A SCOPING REVIEW

### ADDITIONAL FILE 4: INCLUSION AND EXCLUSION CRITERIA

10  
11  
12  
13

**Table 1.** Inclusion and exclusion criteria

| Inclusion Criteria*                                                  | Exclusion Criteria                                                                                                                                                                                                                                                                                 |
|----------------------------------------------------------------------|----------------------------------------------------------------------------------------------------------------------------------------------------------------------------------------------------------------------------------------------------------------------------------------------------|
| 1. Definition(s) of healthcare systems performance sustainability.   | 1. Pertaining to sustainability relating to: <ol style="list-style-type: none"> <li>a. Disaster management, pandemic or other emergency preparedness.</li> <li>b. Foreign aid or foreign investment.</li> <li>c. Workplace health and safety.</li> <li>d. Environmental sustainability.</li> </ol> |
| 2. Measurement of SPHS.                                              | 2. Of no relevance to the Australian context: <ol style="list-style-type: none"> <li>a. Low-income countries.</li> <li>b. Healthcare systems in conflict zones.</li> <li>c. Specific to a country's political situation.</li> </ol>                                                                |
| 3. Discussion and identification of the challenges involved in SPHS. | 3. Does not otherwise deal with sustainability of 'healthcare systems' (e.g., concerned with diagnosis or management of a single disease or improvements in a single healthcare setting).                                                                                                          |
| 4. Discussion or identification of ways in which to improve SPHS.    | 4. Focuses on broad population healthcare initiatives rather than healthcare delivery systems (e.g., vaccination programs).                                                                                                                                                                        |
| 5. Discussion of sustaining and scaling change in SPHS.              | 5. Does not otherwise address the objectives of this review                                                                                                                                                                                                                                        |
|                                                                      | 6. High risk of bias or low quality.                                                                                                                                                                                                                                                               |

14  
15  
16  
17  
18  
19  
20  
21  
22  
23  
24  
25  
26  
27  
28  
29  
30  
31  
32  
33  
34  
35  
36  
37  
38  
39  
40  
41  
42  
43  
44  
45  
46  
47  
48  
49  
50  
51  
52  
53  
54  
55  
56  
57  
58  
59  
60

\*To be eligible for inclusion, articles needed to demonstrate one or more of the inclusion criteria.

# BMJ Open

## How can the Healthcare System Deliver Sustainable Performance? A Scoping Review

|                                 |                                                                                                                                                                                                                                                                                                                                                                                                                                                                                                                                                                                                                                                                                                                                                                                             |
|---------------------------------|---------------------------------------------------------------------------------------------------------------------------------------------------------------------------------------------------------------------------------------------------------------------------------------------------------------------------------------------------------------------------------------------------------------------------------------------------------------------------------------------------------------------------------------------------------------------------------------------------------------------------------------------------------------------------------------------------------------------------------------------------------------------------------------------|
| Journal:                        | <i>BMJ Open</i>                                                                                                                                                                                                                                                                                                                                                                                                                                                                                                                                                                                                                                                                                                                                                                             |
| Manuscript ID                   | bmjopen-2021-059207.R1                                                                                                                                                                                                                                                                                                                                                                                                                                                                                                                                                                                                                                                                                                                                                                      |
| Article Type:                   | Original research                                                                                                                                                                                                                                                                                                                                                                                                                                                                                                                                                                                                                                                                                                                                                                           |
| Date Submitted by the Author:   | 31-Dec-2021                                                                                                                                                                                                                                                                                                                                                                                                                                                                                                                                                                                                                                                                                                                                                                                 |
| Complete List of Authors:       | Zurynski, Yvonne; Macquarie University, Australian Institute of Health Innovation<br>Herkes, Jessica; Macquarie University, Australian Institute of Health Innovation<br>Holt, Joanna; Macquarie University, Australian Institute of Health Innovation<br>McPherson, Elise; Macquarie University, Australian Institute of Health Innovation<br>Lamprell, Gina; Macquarie University, Australian Institute of Health Innovation<br>Dammery, Genevieve; Macquarie University, Australian Institute of Health Innovation<br>Meulenbroeks, Isabelle; Macquarie University, Australian Institute of Health Innovation<br>Halim, Nicole; Macquarie University, Australian Institute of Health Innovation<br>Braithwaite, Jeffrey; Macquarie University, Australian Institute of Health Innovation |
| <b>Primary Subject Heading</b>: | Health services research                                                                                                                                                                                                                                                                                                                                                                                                                                                                                                                                                                                                                                                                                                                                                                    |
| Secondary Subject Heading:      | Health policy, Public health                                                                                                                                                                                                                                                                                                                                                                                                                                                                                                                                                                                                                                                                                                                                                                |
| Keywords:                       | PUBLIC HEALTH, Health policy < HEALTH SERVICES ADMINISTRATION & MANAGEMENT, HEALTH SERVICES ADMINISTRATION & MANAGEMENT                                                                                                                                                                                                                                                                                                                                                                                                                                                                                                                                                                                                                                                                     |
|                                 |                                                                                                                                                                                                                                                                                                                                                                                                                                                                                                                                                                                                                                                                                                                                                                                             |

SCHOLARONE™  
Manuscripts

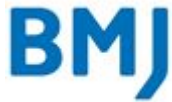

I, the Submitting Author has the right to grant and does grant on behalf of all authors of the Work (as defined in the below author licence), an exclusive licence and/or a non-exclusive licence for contributions from authors who are: i) UK Crown employees; ii) where BMJ has agreed a CC-BY licence shall apply, and/or iii) in accordance with the terms applicable for US Federal Government officers or employees acting as part of their official duties; on a worldwide, perpetual, irrevocable, royalty-free basis to BMJ Publishing Group Ltd ("BMJ") its licensees and where the relevant Journal is co-owned by BMJ to the co-owners of the Journal, to publish the Work in this journal and any other BMJ products and to exploit all rights, as set out in our [licence](#).

The Submitting Author accepts and understands that any supply made under these terms is made by BMJ to the Submitting Author unless you are acting as an employee on behalf of your employer or a postgraduate student of an affiliated institution which is paying any applicable article publishing charge ("APC") for Open Access articles. Where the Submitting Author wishes to make the Work available on an Open Access basis (and intends to pay the relevant APC), the terms of reuse of such Open Access shall be governed by a Creative Commons licence – details of these licences and which [Creative Commons](#) licence will apply to this Work are set out in our licence referred to above.

Other than as permitted in any relevant BMJ Author's Self Archiving Policies, I confirm this Work has not been accepted for publication elsewhere, is not being considered for publication elsewhere and does not duplicate material already published. I confirm all authors consent to publication of this Work and authorise the granting of this licence.



1  
2  
3 HOW CAN THE HEALTHCARE SYSTEM DELIVER SUSTAINABLE PERFORMANCE? A  
4  
5 SCOPING REVIEW  
6

7 Yvonne Zurynski, Jessica Herkes-Deane, Joanna Holt, Elise McPherson, Gina Lamprell,  
8  
9 Genevieve Dammary, Isabelle Meulenbroeks, Nicole K. Halim, Jeffrey Braithwaite  
10  
11  
12  
13

14 \*Yvonne Zurynski and \*Jessica Herkes-Deane are joint first authors  
15  
16

17  
18  
19 \*Yvonne Zurynski, PhD, BAppSc, MAppSc, MHPol  
20

21 Centre for Healthcare Resilience and Implementation Science and the NHMRC Partnership  
22

23 Centre for Health System Sustainability, Australian Institute of Health Innovation  
24

25  
26 Macquarie University  
27

28 Sydney, NSW, Australia  
29  
30  
31  
32

33 \*Jessica Herkes-Deane BSc(Adv), MRes  
34

35 Centre for Healthcare Resilience and Implementation Science and the NHMRC Partnership  
36

37 Centre for Health System Sustainability, Australian Institute of Health Innovation  
38

39  
40 Macquarie University  
41

42 Sydney, NSW, Australia  
43  
44  
45  
46

47 Joanna Holt BSc(Hons); MHP  
48

49 Centre for Healthcare Resilience and Implementation Science and the NHMRC Partnership Centre  
50

51 for Health System Sustainability, Australian Institute of Health Innovation  
52

53  
54 Macquarie University  
55

56 Sydney, NSW, Australia  
57  
58  
59  
60

1  
2  
3  
4  
5 Elise McPherson BA, BSc(Hon), MRes  
6

7 Centre for Healthcare Resilience and Implementation Science, Australian Institute of Health  
8

9  
10 Innovation,  
11

12 Macquarie University  
13

14 Sydney, NSW, Australia  
15  
16  
17  
18

19 Gina Lamprell BA(Hons)  
20

21 Centre for Healthcare Resilience and Implementation Science, Australian Institute of Health  
22

23 Innovation  
24

25  
26 Macquarie University  
27

28 Sydney, NSW, Australia  
29  
30  
31  
32

33 Genevieve Dammery BSc(Hons)  
34

35 NHMRC Partnership Centre for Health System Sustainability, Australian Institute of Health  
36

37 Innovation  
38

39 Macquarie University  
40

41 Sydney, NSW, Australia  
42  
43  
44  
45  
46

47 Isabelle Meulenbroeks B. Physio, MPH  
48

49 NHMRC Partnership Centre for Health System Sustainability, Australian Institute of Health  
50

51 Innovation  
52

53 Macquarie University  
54

55 Sydney, NSW, Australia  
56  
57  
58  
59  
60

1  
2  
3  
4  
5 Nicole K. Halim BSc, MPH  
6

7 Centre for Healthcare Resilience and Implementation Science and the NHMRC Partnership  
8

9  
10 Centre for Health System Sustainability, Australian Institute of Health Innovation  
11

12 Macquarie University  
13

14 Sydney, NSW, Australia  
15  
16  
17  
18

19 Jeffrey Braithwaite PhD, FIML, FCHSM, FFPHRCP, FAcSS, Hon FRACMA, FAHMS  
20

21 Centre for Healthcare Resilience and Implementation Science and the NHMRC Partnership  
22

23 Centre for Health System Sustainability, Australian Institute of Health Innovation  
24

25  
26 Macquarie University  
27

28 Sydney, NSW, Australia  
29  
30  
31  
32

33 **Corresponding author:**  
34

35 Jeffrey Braithwaite  
36

37 Australian Institute of Health Innovation  
38

39 Macquarie University  
40

41 Level 6, 75 Talavera Road  
42  
43

44 North Ryde, NSW 2109,  
45

46 Australia  
47  
48

49 [jeffrey.braithwaite@mq.edu.au](mailto:jeffrey.braithwaite@mq.edu.au)  
50

51 Phone: + 61 2 9850 2401  
52

53 Words Abstract: 300  
54

55 Words Manuscript: 3865  
56  
57  
58  
59  
60

1  
2  
3 HOW CAN THE HEALTHCARE SYSTEM DELIVER SUSTAINABLE PERFORMANCE? A  
4  
5 SCOPING REVIEW  
6  
7  
8  
9

10 **Abstract**

11  
12 **Background:** Increasing health costs, demand, and patient multimorbidity challenge the  
13  
14 sustainability of healthcare systems. These challenges persist and have been amplified by the  
15  
16 global pandemic.  
17

18  
19 **Objectives:** We aimed to develop an understanding of how the sustainable performance of  
20  
21 healthcare systems (SPHS) has been conceptualised, defined, and measured.  
22

23  
24 **Design:** Scoping review of peer reviewed articles and editorials published from database  
25  
26 inception to February 2021.  
27

28  
29 **Data sources:** PubMed and Ovid Medline, and snowballing techniques.  
30

31  
32 **Eligibility criteria:** We included articles that discussed key focus concepts of SPHS: 1)  
33  
34 definitions, 2) measurement, 3) identified challenges, 4) identified solutions for improvement,  
35  
36 and 5) scaling successful solutions to maintain SPHS.  
37

38  
39 **Data extraction and synthesis:** After title/abstract screening, full-text articles were reviewed,  
40  
41 and relevant information extracted and synthesised under the five focus concepts.  
42

43  
44 **Results:** Of 142 included articles, 38 (27%) provided a definition of SPHS. Definitions were  
45  
46 based mainly on financial sustainability, however, SPHS was also more broadly conceptualised  
47  
48 and included acceptability to patients and workforce, resilience through adaptation, and rapid  
49  
50 absorption of evidence and innovations. Measures of SPHS were also predominantly financial,  
51  
52 but recent articles proposed composite measures that accounted for financial, social and health  
53  
54 outcomes. Challenges to achieving SPHS included the increasingly complex patient populations,  
55  
56 limited integration because of entrenched fragmented systems and siloed professional groups, and  
57

1  
2  
3 the ongoing translational gaps in evidence-to-practice and policy-to-practice. Improvement  
4 strategies for SPHS included developing appropriate workplace cultures, direct community and  
5 consumer involvement, and adoption of evidence-based practice and technologies. There was  
6 also a strong identified need for long term monitoring and evaluations to support adaptation of  
7 healthcare systems and to anticipate changing needs where possible.  
8  
9

10  
11  
12 **Conclusions:** To implement lasting change and to respond to new challenges, we need context-  
13 relevant definitions and frameworks, and robust, flexible, and feasible measures to support the  
14 long-term sustainability and performance of healthcare systems.  
15  
16  
17  
18  
19  
20  
21

22  
23  
24 **Keywords:** healthcare system sustainability, sustainable performance of healthcare systems,  
25 healthcare services, value in healthcare  
26  
27  
28  
29  
30  
31  
32

### 33 ***Strengths and limitations of this study***

- 34  
35 • This scoping review addresses a knowledge gap by providing a comprehensive synthesis  
36 of the literature including definitions, measurement, challenges, solutions for  
37 improvement, and scaling up successful solutions to maintain sustainable performance of  
38 healthcare systems (SPHS).  
39  
40  
41  
42  
43
- 44 • The review methodology was guided by the PRISMA-ScR statement, and we searched  
45 multiple databases and used complementary snowballing techniques to increase  
46 comprehensiveness.  
47  
48  
49  
50
- 51 • The use of the Hawker and AACODS quality appraisal tools provided an assessment of  
52 the quality of literature on the sustainable performance of healthcare systems.  
53  
54  
55  
56  
57

1  
2  
3  
4  
5  
6  
7  
8  
9  
10  
11  
12  
13  
14  
15  
16  
17  
18  
19  
20  
21  
22  
23  
24  
25  
26  
27  
28  
29  
30  
31  
32  
33  
34  
35  
36  
37  
38  
39  
40  
41  
42  
43  
44  
45  
46  
47  
48  
49  
50  
51  
52  
53  
54  
55  
56  
57  
58  
59  
60

- Our review is limited in scope to countries with health systems of relevance to Australia, and this limits the generalizability of our results to low- or middle-income countries.

For peer review only

## Background

Globally, healthcare spending is tracking above and beyond economic growth[1]. Challenges facing healthcare systems include an ageing population and subsequent rise of chronic diseases and multimorbidity[2, 3] and increasingly expensive new medical technologies[3, 4]. It is estimated that approximately 30% of care delivered by healthcare systems is low-value, attributable mainly to administrative overheads, bureaucracy, over-diagnosis, overtreatment or other factors[5]. Systems lacking coordination and integration across clinical disciplines and healthcare sectors also result in wasteful spending through both care duplication and omission of needed care[6]. If healthcare spending follows current trajectories, governments suggest that healthcare systems will begin to become unaffordable[3]. This leads us to the question: “what is the current thinking about interventions and initiatives to make healthcare systems more sustainable?” Understanding how healthcare system sustainability is conceptualised underpins the implementation and evaluation of system-wide interventions that aim to improve performance. Although literature about the sustainability of individual innovations and improvement programs is growing,[7] the broad question of whole-of-system sustainability is rarely studied.

Sustainability itself has remained an ambiguous topic in the literature. Sustainability suggests that healthcare systems should be built to last, and able to adapt and endure, ensuring that resources are expended efficiently and responsibly to maintain or improve individual and population health and wellbeing[8]. To be sustainable, a healthcare system must adequately deliver across financial, social, and environmental concerns[4]. This triple bottom-line is difficult to achieve consistently over time. For example, sustainable health services may need additional short-term investments to be financially beneficial in the long-term[1].

1  
2  
3  
4  
5 The healthcare system is defined as one that delivers care to those who need it across many  
6 different settings. It includes key components: capacity- including physical, capital, and human  
7 assets; organisational structure, both formal and informal; finances- including mechanisms for  
8 funding allocations, ownership, and solvency; patients or clients and their characteristics and  
9 needs; and care processes and infrastructure[9].  
10  
11  
12  
13  
14  
15  
16  
17  
18

19 Healthcare system sustainability is difficult to measure in practice and requires ongoing long-  
20 term monitoring and evaluation of appropriate indicators. One potential way to conceptualise and  
21 operationalise sustainability is an assessment of the sustainable performance of healthcare  
22 systems (SPHS). Although past reviews have addressed the sustainability of improvement  
23 programs and policies in the healthcare system,[7, 10, 11] they did not specifically address how  
24 SPHS is conceptualised in the medical literature. As a response, this study was designed using a  
25 systems science lens to fill this gap in knowledge by reviewing publications that report on or  
26 discuss the SPHS.  
27  
28  
29  
30  
31  
32  
33  
34  
35  
36  
37  
38  
39

## 40 **Objectives**

41  
42 This scoping review of health and medical literature aims to develop an understanding of how  
43 SPHS has been conceptualised, defined, and measured, and to scope the identified challenges and  
44 potential solutions to achieving and maintaining SPHS.  
45  
46  
47  
48  
49  
50

## 51 **Methods**

### 52 ***Study Design***

53  
54  
55  
56  
57



In keeping with scoping review methodology,[12] our inclusion criteria were broad, and our search was comprehensive to capture the state of knowledge about SPHS. We included literature reviews, primary empirical articles (including qualitative, quantitative, and mixed methods studies), case studies, opinion pieces, and editorials published in English from database inception to February 2021. To be included, studies had to report on, or discuss in detail, aspects of healthcare systems sustainability, resilience, or performance improvement, and could cover improvements in cost-effectiveness, affordability, safety, quality, equity, or access, whilst creating or realising value (Table 1). Only articles that addressed the research objectives and provided insights into current knowledge of sustainability in healthcare delivery systems were included. Articles on environmental sustainability; those investigating discrete improvement programs implemented in specific healthcare settings including studies on specific diseases or programs (for example studies on vaccination programs for a specific disease); and studies with a specific focus on COVID-19 were out of scope, as we applied a system-wide lens rather than a disease-specific focus (Table 1).

**Table 1.** Inclusion and exclusion criteria

| Inclusion Criteria*                                                  | Exclusion Criteria                                                                                                                                                                                                                                                                     |
|----------------------------------------------------------------------|----------------------------------------------------------------------------------------------------------------------------------------------------------------------------------------------------------------------------------------------------------------------------------------|
| 1. Definition(s) of healthcare systems performance sustainability.   | 1. Pertaining to sustainability relating to: <ol style="list-style-type: none"> <li>Disaster management, pandemic or other emergency preparedness.</li> <li>Foreign aid or foreign investment.</li> <li>Workplace health and safety.</li> <li>Environmental sustainability.</li> </ol> |
| 2. Measurement of SPHS.                                              |                                                                                                                                                                                                                                                                                        |
| 3. Discussion and identification of the challenges involved in SPHS. | 2. Of no relevance to the Australian context: <ol style="list-style-type: none"> <li>Low-income countries.</li> <li>Healthcare systems in conflict zones.</li> <li>Specific to a country's political situation.</li> </ol>                                                             |
| 4. Discussion or identification of ways in which to improve SPHS.    |                                                                                                                                                                                                                                                                                        |

- 
- |                                                         |                                                                                                                                                                                                      |
|---------------------------------------------------------|------------------------------------------------------------------------------------------------------------------------------------------------------------------------------------------------------|
| 5. Discussion of sustaining and scaling change in SPHS. | 3. Does not otherwise deal with sustainability of ‘healthcare systems’ (e.g., concerned with diagnosis or management of a single disease or program or improvements in a single healthcare setting). |
|                                                         | 4. Focuses on broad population healthcare initiatives rather than healthcare delivery systems (e.g., vaccination programs).                                                                          |
|                                                         | 5. Does not otherwise address the objectives of this review                                                                                                                                          |
|                                                         | 6. High risk of bias or low quality.                                                                                                                                                                 |
- 

\*To be eligible for inclusion, articles needed to demonstrate one or more of the inclusion criteria.

### ***Information Sources***

In consultation with an experienced university medical librarian, we developed a search strategy using key words and MeSH terms and conducted an advanced search of PubMed and Ovid Medline (Additional File 1). Additional relevant articles were identified by hand searching reference lists of included articles (snowballing).

### ***Study Selection***

Guided by the Preferred Reporting Items for Systematic review and Meta-Analysis extension for Scoping Reviews (PRISMA-ScR) statement,[13, 14] and the methodological framework for scoping reviews,[12] screening of the article titles and abstracts was conducted by four reviewers (JH, JHD, GD and EM) using the predetermined inclusion and exclusion criteria (Table 1).

Reviewers screened a 5% of sample of the titles and abstracts whilst applying the inclusion and exclusion criteria and the team then met to discuss any discrepancies, before screening continued.

The full-text review was then conducted by a second reviewer team (JHD, YZ, GD, IM and GL) in consultation with JH and EM. Discrepancies were resolved in team meetings in consultation with JB as arbitrator.

### ***Quality Assessment of Individual Studies***

To understand the scope of the quality of included articles, Hawker et al.'s Quality Assessment Tool was applied as it enables quality assessment among many different article types including quantitative, qualitative, or mixed-methods empirical research studies or literature reviews[15]. The Quality Assessment Tool contains nine categories (abstract and title; introduction and aims; method and data; sampling; data analysis; ethics and bias; results; transferability or generalizability; and implications and usefulness) and a total quality score can be calculated (maximum score=36), where higher scores denote higher quality[15-17]. For quality assessment of opinion or commentary pieces, the Authority Accuracy Coverage Objectivity Date Significance (AACODS) Checklist was used[12, 17].

### ***Data Extraction***

Characteristics of included articles, year of publication, country of origin, and article type were tabulated. A purpose-designed Excel spreadsheet was used to extract relevant details from each article. The Excel spreadsheet was piloted by three reviewers on five articles and adjusted as needed.

### ***Patient and Public Involvement***

No patients or public were involved.

## **Results**

### ***Study Selection***

1  
2  
3 Of 5675 articles identified in the database searches, 2404 were duplicates, leaving 3271 articles.  
4  
5 Undertaking independent title and abstract screening of 5% of articles, two reviewers achieved an  
6  
7 acceptable level of agreement ( $Kappa = 0.6$ )[18]. A further 2750 articles were excluded, leaving  
8  
9 521 articles for full-text review. A substantial level of agreement was achieved on review of 5%  
10  
11 of full text articles undertaken independently by four reviewers JHD, YZ, GD and IM; ( $Kappa =$   
12  
13  $0.7$ )[18]. After full-text review, 136 articles were included. Eighty-three additional articles were  
14  
15 identified from snowballing, and six met the inclusion criteria, for a total of 142 articles included  
16  
17 for data extraction (Figure 1). See Additional File 2 for further details.  
18  
19  
20  
21  
22  
23

24 [Insert **Figure 1**. PRISMA flow diagram summarising the review and reasons for article  
25  
26 exclusion\* here]  
27  
28  
29  
30

### 31 *Study Characteristics*

32  
33 Of the included articles, 18 were review articles (either systematic or narrative), 82 were editorial  
34  
35 or opinion pieces, 37 were primary empirical studies, and five were a brief narrative review  
36  
37 combined with an empirical study (classified as empirical for simplicity). Empirical studies used  
38  
39 a wide variety of data collection techniques and included qualitative analysis of interviews,[19]  
40  
41 survey results,[20, 21] analysis of hospital data records,[22, 23] and economic analysis[24-28].  
42  
43  
44 The included articles described studies that covered various geographic locations, most  
45  
46 commonly Canada ( $n=22$ ), the United States of America ( $n=22$ ), Australia ( $n=23$ , including two  
47  
48 which involved Australia and New Zealand), the United Kingdom ( $n=6$ ), the Netherlands ( $n=2$ ),  
49  
50 and one each from the following countries Austria, Italy, Northern Ireland, Malaysia, Malta, New  
51  
52 Zealand, Oman, the Philippines, Portugal, Scotland and Spain. The remainder of studies referred  
53  
54 to geographical regions such as the European Union, or to multiple nations, for example one  
55  
56  
57  
58  
59  
60

1  
2  
3 included the United States of America, the United Kingdom, and Australia[29] and another  
4  
5 included Australia, Ireland, Austria and Denmark[30].  
6  
7  
8  
9

10 The data extraction sheet included the citation, study aims, study design, themes addressed, and  
11 additional relevant information about SPHS. Details of the 142 included articles are summarised  
12 in Additional File 2. Of the 142, most identified challenges (n=94, 66%) and proposed ways to  
13 improve SPHS (n=89, 62%) while fewer discussed measuring SPHS (n=48, 34%), or sustaining  
14 and scaling change (n=47, 33%) and fewer still provided any definition of SPHS (n=38, 27%).  
15  
16  
17  
18  
19  
20  
21  
22  
23

### 24 ***Quality of Included Studies***

25  
26 Forty-three empirical studies scored 25-34 points on the Hawker's Quality Assessment Tool,[15]  
27 and 29 were of high quality, 13 moderate quality, and one borderline low quality[16]. None were  
28 excluded due to low quality (Additional File 3). The quality of editorial and opinion pieces  
29 (n=99) was analysed according to the AACODS criteria, and 72 articles ranked 'yes' for all  
30 criteria indicating high quality (Additional File 3).  
31  
32  
33  
34  
35  
36  
37  
38  
39

### 40 ***Defining SPHS***

41  
42 Definitions of SPHS were provided by 38 publications including 25 opinion pieces, seven review  
43 articles, and six empirical studies (Table 2). The definitions fell into three broad groupings: 1)  
44 fiscal sustainability, 2) human resource sustainability and acceptance of change by stakeholders,  
45 and 3) system adaptability and improvement (Table 2). Definitions focused on continual  
46 improvement,[29] and embeddedness of changes into the healthcare system in the long term[31-  
47  
48  
49  
50  
51  
52  
53  
54  
55  
56  
57  
58  
59  
60

Several articles defined SPHS in terms of fiscal sustainability[24, 32-37]. Examples included discussions of sustainability of rural primary care services in the face of ongoing policy change to reimbursement and practice incentives,[36] adoption of new funding models to ensure availability of medicines,[24] and hospital capital investments to improve patient access to care[35]. Articles also discussed the importance of balancing financial interests with social and ecological interests[38]. Several papers conceptualised SPHS as the continuation of programs after the cessation of external program-specific funding[39-41].

Four articles[42-45] discussed SPHS through the lens of a learning healthcare system, a system in which ‘science, informatics, incentives, and culture are aligned for continuous improvement and innovation’[46]. These articles focussed predominantly on using data and evidence to support system adaptability and improvement over time.

**Table 2.** Definitions of SPHS

| Definition                                      | Exemplar Quotes                                                                                                                                                                                                                                                                                        | Relevant References |                              |                      |
|-------------------------------------------------|--------------------------------------------------------------------------------------------------------------------------------------------------------------------------------------------------------------------------------------------------------------------------------------------------------|---------------------|------------------------------|----------------------|
|                                                 |                                                                                                                                                                                                                                                                                                        | Empirical articles  | Editorials or opinion pieces | Reviews              |
| Fiscal sustainability                           | “The WHO considers fiscal sustainability as a requirement, rather than an objective, of health financing policy. Sustainability of healthcare financing therefore cannot be interpreted as a reduction of healthcare costs, but rather as a predictable growth or control of health expenditures.”[24] | [35, 36, 47, 48]    | [24, 32-34, 37, 39, 49]      | [40, 41, 47, 50, 51] |
| Human resource sustainability and acceptability | “It has been increasingly recognised that getting HR policy and management "right" has to be at the core of any sustainable solution to health system performance”[32, 52]                                                                                                                             | [48]                | [32-34, 38, 49, 52-58]       | [31, 51]             |

|                                                                                |                                                                                                                                                                                                                                                                                                                                                                                                                                                            |          |                                |                      |
|--------------------------------------------------------------------------------|------------------------------------------------------------------------------------------------------------------------------------------------------------------------------------------------------------------------------------------------------------------------------------------------------------------------------------------------------------------------------------------------------------------------------------------------------------|----------|--------------------------------|----------------------|
| to stakeholders                                                                | “A sustainable health system also has acceptability to key constituents, including patients and health professionals.” [33]                                                                                                                                                                                                                                                                                                                                |          |                                |                      |
| Adaptability and improvement over time to create a future-focused intervention | “A sustainable health system ... [has] adaptability, because health and health care needs are not static (i.e., a health system must respond adaptively to new diseases, changing demographics, scientific discoveries, and dynamic technologies in order to remain viable).”[33]<br>“Ensuring that sufficient resources are available over the long term to provide timely access to quality services that address Canadians’ evolving health needs.”[59] | [36, 43] | [4, 33, 39]<br>[42, 49, 55-65] | [31, 50, 51, 66, 67] |

### *Measuring SPHS*

The measurement of SPHS was addressed through theoretical discussions across the 24 editorials and seven review articles, and by proposing, developing, or applying frameworks or indicators in 17 empirical studies (Table 3). These frameworks and indicators were heterogeneous and included financial, social and healthcare outcomes[68] with some articles highlighting the limitations of widely used financial metrics[34, 69]. Although heterogeneous,[40] measures were undertaken at three broad outcome levels: 1) Individual (e.g., continued health benefits for patients or healthcare providers); 2) Organisational (e.g., continuation of innovations, hospital-level fiscal improvements); or 3) Community (e.g., continued use of programs, services or healthcare interventions).

A variety of new SPHS measures were proposed, developed, modified, or tested in research environments[20, 22, 45, 66, 70, 71] to address current deficits in available measures (Table 3).

For example, the Q\*Scale was designed to combine data on caseload, patient satisfaction and physician aptitude, such that changes in hospital performance could be more effectively monitored[70]. In contrast, the Dynamic Sustainability Framework (DSF) seeks to investigate the fit between the intervention, practice settings, contexts and cultures, healthcare policies, and the broader ecology within which healthcare systems operate, including socio-political systems[39]. Similarly, the Health Care Sustainability Framework (HCSF) and the Responsible Innovations for Health (RIH) framework, recognise the importance of accounting for the needs and trends of the population, workforce, and financial constraints[72, 73]. Alternative models utilising a scoring system (e.g. using the Resilience Indicator) were based on data-driven simulation modelling,[74] or theoretical composite indicators of the value of healthcare systems[74, 75].

**Table 3.** Summary of established and novel frameworks suggested for measuring SPHS

| <b>Established framework name</b>                    | <b>Rationale for use</b>                                                                                                                                                  |
|------------------------------------------------------|---------------------------------------------------------------------------------------------------------------------------------------------------------------------------|
| Organisational Change Model (OCM)                    | To measure the success of sustained organisational change, according to faculty member survey respondents [71]                                                            |
| Analysis of hospital records (e.g., payroll records) | Measuring staff turnover, workforce supply and financial sustainability [22, 26]                                                                                          |
| Evaluation of health networks                        | To evaluate the effectiveness and sustainability of health networks [76]                                                                                                  |
| <b>Novel framework name</b>                          | <b>Rationale for development</b>                                                                                                                                          |
| Q* Scale                                             | To measure performance at the hospital level [70]                                                                                                                         |
| Dynamic Sustainability Framework (DSF)               | To investigate the fit between the intervention, the practice setting, and the ecological system [39]<br>To improve measurement of SPHS beyond patient outcomes only [40] |
| Resilience Indicator                                 | To highlight the systemic relevance of primary care network systems to quantify healthcare resilience [74]                                                                |
| eMergy (embodied energy)<br>Sustainability Index     | To address the lack of qualitative indicators for sustainability [66]                                                                                                     |



|                                                    |                                                                                                                                                  |
|----------------------------------------------------|--------------------------------------------------------------------------------------------------------------------------------------------------|
| Future Health Index (FHI)                          | To identify preparedness of countries to building sustainable health systems [75]                                                                |
| Health Care Sustainability Framework (HCSF)        | To measure the relationships between political and fiscal sustainability of an intervention [72]                                                 |
| Responsible Innovations for Health (RIH) Framework | To identify interventions that suitably address five domains (population health, healthcare system, economic, organisational, environmental)[73] |
| Research Lifecycle Framework                       | To enhance the impact of the Learning Health System by operationalising research innovations into clinical practice [45]                         |
| Value Of Diagnostic Information (VODI) Framework   | To outline the multidimensional benefits and potential of healthcare diagnostics [77]                                                            |

### ***Identified Challenges to SPHS***

Ninety-four articles, including 60 editorials, 22 empirical studies and 12 reviews, identified challenges to SPHS across three main themes: 1) increasingly complex patient populations; 2) ongoing gaps between evidence, policy and practice; and 3) concerns of system fragmentation and need for integration for a more streamlined adoption and sustainment of interventions.

Increasingly complex patient populations,[3, 23, 49, 74, 78-84] including patients with multi-morbidity[21, 48, 74, 79, 80, 82, 85, 86] and greater demand for effective aged care, under already strained healthcare budgets[3, 27, 49, 57, 87-92] were frequently discussed. The increasing demands and expectations of patients for healthcare of the highest quality challenges healthcare systems to meet this demand[4, 21, 79, 80, 82, 93, 94].

The gaps between evidence, policy and practice[40, 95, 96] continue to threaten SPHS as does limited investment in building workforce capacity and stakeholder involvement[30, 43]. The

1  
2  
3 challenge of increasing public scrutiny and the need to balance financial, environmental, and  
4  
5 social sustainability were also recognised[28, 38, 63, 97, 98].  
6  
7  
8  
9

10 The fragmented nature of healthcare systems including power imbalances among the health  
11  
12 professions, and resistance to changes in the scope of practice was reported to limit team  
13  
14 approaches to care[99, 100]. Siloed care delivery models can become misaligned with the  
15  
16 complexity of the healthcare system and the complexity of patient needs[55, 72, 101, 102]. Other  
17  
18 publications reported lack of collaboration between public and private hospitals[91, 103] and  
19  
20 widening gaps in care quality in rural/remote regions due to limited resources[23, 36, 91, 104].  
21  
22 Poor integration of primary care with the broader healthcare system was also seen as challenging  
23  
24  
25  
26  
27  
28  
29  
30  
31  
32  
33  
34  
35  
36  
37  
38  
39  
40  
41  
42  
43  
44  
45  
46  
47  
48  
49  
50  
51  
52  
53  
54  
55  
56  
57  
58  
59  
60

### ***Opportunities for Improvement of SPHS***

To address the challenges posed requires more than a one-time simple "fix". Continued  
adaptation in response to local contexts, and ongoing monitoring and evaluation are required to  
support the sustainment of effective solutions and to anticipate future needs and solutions[71].

Twelve review articles, 19 empirical articles, and 56 editorials discussed opportunities to improve  
SPHS.

Greater strategic investment in the system,[34, 62, 69, 88, 89] including funding novel  
interventions,[26, 40, 53, 98, 105] and capacity building programs for staff[30, 106] were  
advocated. Workplace culture in healthcare was identified as an important factor for SPHS. The  
importance of physician well-being was highlighted,[44, 95, 107, 108] and was strongly linked  
with organisational culture[17]. The importance of mentorship, teaching and leadership were also

1  
2  
3 highlighted as enablers of organisational improvements[19, 43, 94, 95]. Building healthcare  
4  
5 system cultures that support medical graduates was viewed as crucial[38, 108-110]. Promoting  
6  
7 incentives for generalist doctors to practice rurally was thought to address the current  
8  
9 geographical gap in access to healthcare[44, 104, 109-111].  
10  
11  
12  
13

14  
15 The promotion of desired attitudes, values and ideals of healthcare organisations was also  
16  
17 recognised for achieving SPHS. Specifically, the value of patient-centred care and evidence-  
18  
19 based medicine[30, 44, 65, 79, 84, 85, 111, 112], and collaboration between and within  
20  
21 healthcare facilities and disciplines was highlighted as important for SPHS[42, 48, 103, 112-115].  
22  
23 Support by management that values the workforce, uses robust data-driven hospital management  
24  
25 systems, and accessible, shared electronic medical record systems was also acknowledged as  
26  
27 vital[93, 116].  
28  
29  
30  
31  
32

33  
34 The importance of political stability and bridging the jurisdictional-federal divide in federated  
35  
36 healthcare systems (such as in the US, Canada, and Australia) was important for effective unified  
37  
38 healthcare system functioning[24, 51, 88, 89, 117, 118]. It is not only organisational culture in  
39  
40 healthcare,[119] but the broader organisation, governance and regulation of the healthcare system  
41  
42 that are important for SPHS[64, 120, 121].  
43  
44  
45  
46

47  
48 Community involvement is an important factor that bolsters capacity to implement and sustain  
49  
50 change[116]. Empowering patients to care for their own health, and building confidence among  
51  
52 caregivers to deliver some aspects of care, reduces burden on the healthcare system[79].  
53

54  
55 Community involvement via Community Based Participatory Research bolstered equity and  
56  
57  
58  
59  
60

1  
2  
3 improved outcomes of care[122] and responding to recommendations from citizen panels also  
4  
5 improved SPHS[92, 115, 123].  
6  
7  
8  
9

10 As technology advances, so does the ability to harness it to promote the sustainability of  
11  
12 healthcare systems[33]. For example, point-of-care electronic prompts were used in one study of  
13  
14 hospital surgical wards to decrease rates of hospital-acquired infections[124]. Embedding  
15  
16 artificial intelligence and big data analytics hold promise to support efficient and effective service  
17  
18 delivery to improve SPHS[55]. Other studies have suggested greater adoption of telemedicine to  
19  
20 reduce travel time and costs[4] as complementary support to patients,[105] to improve  
21  
22 diagnostics,[77] and as a platform to promote prevention of illness,[23] as contributing to SPHS.  
23  
24  
25  
26  
27

### 28 ***Sustaining and Scaling Change in SPHS***

29  
30 Forty-seven articles addressed this theme, including nine reviews, 11 empirical articles and 27  
31  
32 editorials. As interventions are often implemented with limited and/or short-term (2-3 year)  
33  
34 evaluation plans, demonstrating SPHS is often elusive[40]. Robust evaluations using relevant  
35  
36 SPHS indicators embedded alongside implementation, from the outset to support adaptations and  
37  
38 decisions about ongoing investments were advocated[51, 125]. One article proposed that federal  
39  
40 funding agencies should perceive funding implementations of health innovations as ongoing  
41  
42 strategic investments rather than time-limited projects[42].  
43  
44  
45  
46  
47  
48

49 The importance of accepting changes or adaptations to proposed interventions were also  
50  
51 highlighted [126, 127]. For example, Greenhalgh *et al*[127] reported on a three-year case study  
52  
53 follow-up of a healthcare system transformation and found that adaptations of the intervention to  
54  
55 local contexts was important for sustainment of the intervention.  
56  
57  
58  
59  
60

1  
2  
3  
4  
5 A recurring sentiment in the articles reviewed was the importance of support for the continuation  
6 of interventions from leaders and stakeholders[65, 78, 116, 119, 128, 129]. Leaders and managers  
7 have a clear role in supporting staff throughout the processes of reforms and changes, by  
8 providing opportunities for co-design, education including e-learning, and building peer  
9 networks[62, 130] whilst creating open communication to involve front-line staff in planning and  
10 implementation[116, 131]. For example, one article suggested that pharmacists should be  
11 involved in developing hospital discharge procedures to improve medication safety and  
12 adherence[132]. In more recent articles, policy makers and political leaders are highlighted as  
13 important change agents, as long as they work in concert with front-line health staff[51, 129,  
14 133].

15  
16  
17  
18  
19  
20  
21  
22  
23  
24  
25  
26  
27  
28  
29  
30  
31 Transparent healthcare policies and algorithms for equitable distribution of healthcare funds was  
32 advocated, and particularly prioritised by rural areas[36, 69]. Beyond the government,  
33 communities and multi-sectorial partners,[49] and collaborations among hospitals, medical  
34 schools and physicians were also highlighted as vital for SPHS[68].

35  
36  
37  
38  
39  
40  
41  
42 Although publications in our review predominantly urged for the sustainability of innovations,  
43 recent literature also highlights the need for discontinuation or redesign of programs that have  
44 become ineffective or irrelevant over time[4, 39, 127]. This is important to achieve sustainability  
45 as it ensures that value is maintained in the healthcare system[134].  
46  
47  
48  
49  
50  
51  
52

## 53 **Discussion**

54  
55  
56  
57  
58  
59  
60

1  
2  
3 Definitions of SPHS were rarely offered, with only 27% of included articles providing any  
4  
5 definition of SPHS whilst referring to the concept of SPHS. When definitions were provided,  
6  
7 they mainly centred on financial and workforce sustainability, and a variety of concepts related to  
8  
9 adaptability, improvement, and innovation for the future. The lack of definitions and variability  
10  
11 in definitions creates significant limitations for the interpretation of the current body of literature  
12  
13 on SPHS. As a first step to address this limitation, we would urge authors discussing SPHS to  
14  
15 provide a definition that is relevant to their context. Furthermore, there were interesting contrasts  
16  
17 in the boundaries adopted to describe the ‘healthcare system’ in the included papers which has  
18  
19 also been identified by others[135]. For example, some studies measured SPHS at a single  
20  
21 hospital level,[70] whereas others addressed it at a national system level,[136] making  
22  
23 comparisons across studies difficult. In the future, as evidence about SPHS develops it may be  
24  
25 possible to create nuanced measures, definitions, and approaches to SPHS as applied to different  
26  
27 healthcare system levels and contexts.  
28  
29  
30  
31  
32  
33  
34

35 The long-standing approach to measuring SPHS in terms of financial outcomes is increasingly  
36  
37 becoming more sophisticated through the development of newer more nuanced frameworks and  
38  
39 indicators that account for health and societal benefits whilst factoring in the complex and  
40  
41 dynamic nature of healthcare systems. Although new frameworks and measures, for example the  
42  
43 Future Health Index,[75] the Q\*Scale[70] and the Resilience Indicator[74] have been proposed,  
44  
45 the evidence for the practical application of such frameworks and measures in the real world was  
46  
47 limited.  
48  
49  
50  
51  
52

53 The most common opportunities for improving SPHS related to building supportive and  
54  
55 functional workplace and organisational cultures that promote collaboration, transparency, patient  
56  
57

centredness and community participation. The adoption of technological advances including greater use of linked up information technology platforms to provide intelligence about aspects of SPHS were also discussed in the literature[4, 23, 33, 105, 124]. Importantly, policy and political stability over time was also recognised as a supportive factor for SPHS, especially when implementing innovations and interventions that require longer term horizons to demonstrate their impacts on SPHS[24, 40, 51, 88, 89, 96, 117, 118]. This aligns with findings from a recent systematic review that specifically focused on the sustainability of health improvement programs[44].

The increasing adoption of pragmatic implementation trials in healthcare research is an important advance to support effectiveness testing in real-life situations rather than in contrived randomised controlled trials that are difficult to implement at scale in real-world settings to meet the needs of changing populations[46, 131].

Table 4 provides a summary of the current evidence about SPHS under five headings: defining sustainability; measuring it; associated challenges of realising sustainable performance; identifying opportunities for improvement; and creating, sustaining and scaling SPHS. This provides an important starting point for future research in the field.

**Table 4.** Summary of key findings under the five SPHS focus areas analysed in this review

| Criteria                | Explanation              | Key points from included articles                                                                                                                                                                                     |
|-------------------------|--------------------------|-----------------------------------------------------------------------------------------------------------------------------------------------------------------------------------------------------------------------|
| Defining sustainability | What do we mean by SPHS? | <ul style="list-style-type: none"> <li>- SPHS is difficult to define [29, 31-33]</li> <li>- Sustainability is most often framed in terms of fiscal/financial or economic sustainability [4, 24, 32-37, 66]</li> </ul> |

|                               |                                                                                 |                                                                                                                                                                                                                                                                                                                                                                                                                                                                                                                                                                                                                                      |
|-------------------------------|---------------------------------------------------------------------------------|--------------------------------------------------------------------------------------------------------------------------------------------------------------------------------------------------------------------------------------------------------------------------------------------------------------------------------------------------------------------------------------------------------------------------------------------------------------------------------------------------------------------------------------------------------------------------------------------------------------------------------------|
|                               |                                                                                 | - Sustaining a system intervention post-implementation and initial funding period [39-41]                                                                                                                                                                                                                                                                                                                                                                                                                                                                                                                                            |
| Measuring                     | How do we measure SPHS?                                                         | <ul style="list-style-type: none"> <li>- Issue of system boundaries—at which level should we measure sustainability? (e.g., at the individual hospital or healthcare system level) [70, 136]</li> <li>- Heterogeneous outcome data collection techniques (e.g., individual, organisation and community level) [34, 40, 68, 69]</li> <li>- Wide variety of new methods and indicators suggested (see Table 3) [20, 22, 66, 70, 71, 73]</li> </ul>                                                                                                                                                                                     |
| Associated challenges         | What challenges are associated with SPHS?                                       | <ul style="list-style-type: none"> <li>- Complex patient population (e.g., ageing, comorbidities and chronic illnesses) [3, 4, 21, 27, 49, 78-80, 85-91, 93]</li> <li>- The chasm between evidence and practice and policy and practice [26, 28, 34, 40, 53, 62, 63, 69, 88, 89, 95-98, 105, 106]</li> <li>- Fragmentation and gaps (e.g., power imbalances between healthcare personnel, rural versus urban services, fragmentation between public and private hospitals) [36, 71, 72, 91, 99-101, 103]</li> </ul>                                                                                                                  |
| Opportunities for improvement | What helps improve SPHS?                                                        | <ul style="list-style-type: none"> <li>- Workplace culture (e.g., mentorship, leadership, support for health professionals) [17, 19, 95, 104, 107, 109, 110]</li> <li>- Organisational culture (e.g., promoting collaborative attitudes, transparency, patient-centred care and political stability) [24, 79, 85, 88, 89, 93, 103, 113, 116-118]</li> <li>- Consumer and community involvement to align the system with needs (e.g., patient reported measures, in research, focus groups, and consumer panels) [79, 116, 122, 123]</li> <li>- Implementing technological advances (e.g., e-health) [4, 23, 33, 105, 124]</li> </ul> |
| Sustaining and scaling        | What initiatives for have been used to improve and maintain to SPHS (or value)? | <ul style="list-style-type: none"> <li>- Setting up interventions for sustainability (e.g., extended initial funding periods, ongoing evaluation feedback loops, using pragmatic trial designs) [40, 98, 124, 137]</li> <li>- Support from all stakeholders [49, 62, 78, 116, 128, 130-132]</li> <li>- Developing cross-sectoral, interdisciplinary relationships and collaborations [36, 68, 69, 79]</li> </ul>                                                                                                                                                                                                                     |



- 
- Ability of intervention to adapt and flex depending on the context of implementation [127]
- 

### ***Strengths and Limitations***

Methodological strengths of the current review include the use of the PRISMA-ScR statement to guide the review, including searching multiple databases and using snowballing techniques to increase comprehensiveness. Although formal quality appraisal is not recommended for scoping reviews, we felt it was important to also understand the scope of the quality of articles being published in addition to understanding their content and findings about SPHS.

As described above, the heterogenous nature of the current literature and limited use of definitions and frameworks made synthesis challenging. Our choice to limit the current review to studies reporting on SPHS in high-income countries further limits generalisability to other settings including in low- and middle-income countries (LMICs).

### ***Future research directions***

This article summarises the current scope of the literature on SPHS and provides an important starting point for future research. Although new SPHS measures and frameworks that include factors other than financial inputs and outputs have been proposed, their usefulness needs to be evaluated in the real-world healthcare ecosystem in the future. Taking a broad system-wide lens, our focus was on the SPHS in healthcare delivery settings and did not specifically consider individual programs for specific diseases, conditions or settings. In addition, the role of preventative care and broader public health prevention measures such as vaccination programs, should be a focus for future research. Research on the specific effect of the COVID-19 pandemic on SPHS is warranted to inform future responses to similar broad-ranging global threats to

1  
2  
3 SPHS[124, 125]. Understanding the scope of SPHS in LMICs is important for the future  
4  
5 development of SPHS and future research is needed to summarise current knowledge,  
6  
7 interventions, programs and measures of SPHS in these settings.  
8  
9

## 11 **Conclusion**

12  
13  
14 There is broad agreement that the sustainability of healthcare systems and their performance  
15  
16 levels are increasingly being challenged. Our review confirms that the concept of SPHS is  
17  
18 important and is frequently discussed in the health and medical literature. The field of SPHS is  
19  
20 expanding with recent publications defining SPHS in terms other than the traditional financial  
21  
22 measures. This places more emphasis on acceptability of the system to patients, healthcare  
23  
24 providers and other stakeholders, adaptation and resilience, and sufficient nimbleness to absorb  
25  
26 new evidence and innovations to support continuous improvements.  
27  
28  
29

30  
31  
32 It is unlikely that we will, nor should we, settle on a single definition of SPHS. We would favour  
33  
34 definitions that are robust but flexible to ensure their utility in the many and varied healthcare  
35  
36 system contexts, however, authors and editors should strive to ensure that a definition is provided  
37  
38 in any discussions of SPHS. We need sophisticated yet practical indicators of SPHS that capture  
39  
40 sustainability beyond the traditional financial measures. Such measures have been proposed in  
41  
42 the research literature, but their utility needs to be tested in real-world settings. The current  
43  
44 literature suggests that SPHS is improved by strengthening of workplace cultures, continuous  
45  
46 workforce development, direct health consumer and community involvement, and swift adoption  
47  
48 and embedding of new evidence and technologies that are proven to have an advantage over  
49  
50 current practice.  
51  
52  
53  
54  
55  
56  
57

### List of Abbreviations:

|        |                                                                   |
|--------|-------------------------------------------------------------------|
| AACODS | Authority Accuracy Coverage Objectivity Date Significance         |
| DFS    | Dynamic Sustainability Framework                                  |
| HCSF   | Health Care Sustainability Framework                              |
| OCM    | Organisational Change Model                                       |
| PRISMA | Preferred Reporting Items for Systematic review and Meta-Analysis |
| RIH    | Responsible Innovations for Health                                |
| SPHS   | Sustainable Performance of Healthcare Systems                     |
| WHO    | World Health Organisation                                         |

### Additional Files

**Additional File 1:** SEARCH STRATEGY (Zurynski\_HerkesAdditionalFile1-search strategy.docx)

**Additional File 2:** SUMMARY OF INCLUDED PAPERS (Zurynski\_HerkesAdditionalFile2-summary of included papers.docx)

**Additional File 3:** QUALITY ASSESSMENT (Zurynski\_Herkes\_AdditionalFile3-quality assessment.docx)

### Declarations

#### Ethics approval and consent to participate

Not applicable.

#### Authors' contributions

JB conceptualised the study and led the team's work. EM, JHD, JH and YZ developed the search strategy. EM, JHD, JH, GL, GD, and YZ conducted the abstract review, and JHD, GD, GL, IM and YZ full-text review and data extraction, with JB acting as arbitrator when needed. JHD, IM

1  
2  
3 and GD conducted the quality assessment. YZ and JHD drafted the manuscript with input from  
4  
5 GD and NKH, and all authors contributed their comments and approved of the final version of  
6  
7 the manuscript.  
8  
9

### 10 **Funding**

11  
12 This work was supported by the NHMRC Partnership Centre for Health System Sustainability  
13  
14 (Grant ID 9100002) and NHMRC Investigator Grant APP1176620.  
15  
16

### 17 **Competing interests**

18  
19 There are not competing interests.  
20  
21  
22

### 23 **Patient consent for publication**

24  
25 Not applicable.  
26  
27

### 28 **Provenance and peer review**

29  
30 Not commissioned; externally peer reviewed.  
31  
32

### 33 **Availability of data and materials**

34  
35 All data relevant to the study are included in the article or uploaded as supplementary information  
36  
37  
38

### 39 **Acknowledgements**

40  
41 We gratefully acknowledge Kelly Nguyen for administrative and logistical support.  
42  
43  
44  
45  
46  
47  
48  
49  
50  
51  
52  
53  
54  
55  
56  
57  
58  
59  
60

## Uncategorized References

1. OECD. Fiscal sustainability of health systems: bridging health and finance perspectives. Paris, France: OECD Publishing; 2015.
2. Global, regional, and national disability-adjusted life-years (DALYs) for 315 diseases and injuries and healthy life expectancy (HALE), 1990-2015: a systematic analysis for the Global Burden of Disease Study 2015. *Lancet* 2016;388:1603-58.
3. Amalberti R, Nicklin W, Braithwaite J. Preparing national health systems to cope with the impending tsunami of ageing and its associated complexities: Towards more sustainable health care. *Int J Qual Health Care* 2016;28:412-4.
4. Coiera E, Hovenga EJ. Building a sustainable health system. *Yearb Med Inform* 2007;11-8.
5. Fisher ES, Bynum JP, Skinner JS. Slowing the growth of health care costs - lessons from regional variation. *N Engl J Med* 2009;360:849-52.
6. Zhi M, Ding EL, Theisen-Toupal J, Whelan J, Arnaout R. The landscape of inappropriate laboratory testing: a 15-year meta-analysis. *PLoS One* 2013;8:e78962-e.
7. Braithwaite J, Ludlow K, Testa L, Herkes J, Augustsson H, Lamprell G, et al. Built to last? The sustainability of healthcare system improvements, programs and interventions: a systematic integrative review. *BMJ Open* 2020;10:e036453.
8. AIHI. Purpose Sydney, Australia: Australian Institute of Health Innovation; 2017 [Available from: <https://www.healthsystemsustainability.com.au/about-us-2/purpose-of-nhmrc-partnership-centres/>].
9. Piña IL, Cohen PD, Larson DB, Marion LN, Sills MR, Solberg LI, et al. A framework for describing health care delivery organizations and systems. *Am J Public Health* 2015;105:670-9.
10. Lennox L, Maher L, Reed J. Navigating the sustainability landscape: a systematic review of sustainability approaches in healthcare. *Implement Sci* 2018;13.
11. Wiltsey Stirman S, Kimberly J, Cook N, Calloway A, Castro F, Charns M. The sustainability of new programs and innovations: a review of the empirical literature and recommendations for future research. *Implement Sci* 2012;14:17.
12. Arksey H, O'Malley LO. Scoping studies: towards a methodological framework. *Int J Soc Res Methodol* 2005;8:19-32.
13. Moher D, Liberati A, Tetzlaff J, Altman DG, The PRISMA Group. Preferred reporting items for systematic reviews and meta-analyses: the PRISMA statement. *PLoS Med* 2009;6:e1000097.
14. Shamseer L, Moher D, Clarke M, Ghersi D, Liberati A, Petticrew M, et al. Preferred reporting items for systematic review and meta-analysis protocols (PRISMA-P) 2015: elaboration and explanation. *BMJ* 2015;349:g7647.
15. Hawker S, Payne S, Kerr C, Hardey M, Powell J. Appraising the evidence: reviewing disparate data systematically. *Qual Health Res* 2002;12:1284-99.
16. Lorenc T, Pettigrew M, Whitehead M. Appendix 5: quality assessment for the systematic review of qualitative evidence. In: Research PH, editor. *Crime, Fear of Crime and Mental Health: Synthesis of Theory and Systematic Reviews of Interventions and Qualitative Evidence*. 2.2. Southampton, United Kingdom: NIHR Journals Library; 2014.
17. Braithwaite J, Herkes J, Ludlow K, Testa L, Lamprell G. The association between organisational and workplace cultures, and patient outcomes: systematic review. *BMJ Open* 2017;7:e017708.
18. Landis J, Koch G. The measurement of observer agreement for categorical data. *Biometrics* 1977;33:159-74.
19. Stockdale SE, Zuchowski J, Rubenstein LV, Sapir N, Yano EM, Altman L, et al. Fostering evidence-based quality improvement for patient-centered medical homes: initiating local quality councils to transform primary care. *Health Care Manag Rev* 2018;43:168-80.

20. Lizarondo L, Turnbull C, Kroon T, Grimmer K, Bell A, Kumar S, et al. Allied health: integral to transforming health. *Aust Health Rev* 2016;40:194-204.
21. Robertson J, Walkom EJ, Henry DA. Health systems and sustainability: doctors and consumers differ on threats and solutions. *PLoS One* 2011;6:e19222.
22. Fox LA, Walsh KE, Schainker EG. The creation of a pediatric hospital medicine dashboard: performance assessment for improvement. *Hosp Pediatr* 2016;6:412-9.
23. Pencheon D. Developing a sustainable health and care system: lessons for research and policy. *J Health Serv Res Policy* 2013;18:193-4.
24. Inotai A, Petrova G, Vitezic D, Kalo Z. Benefits of investment into modern medicines in Central-Eastern European countries. *Expert Rev Pharm Out* 2014;14:71-9.
25. Sepehri A. Does autonomization of public hospitals and exposure to market pressure complement or debilitate social health insurance systems? Evidence from a low-income country. *Int J Health Serv* 2014;44:73-92.
26. Zhao Y, Russell DJ, Guthridge S, Ramjan M, Jones MP, Humphreys JS, et al. Long-term trends in supply and sustainability of the health workforce in remote Aboriginal communities in the Northern Territory of Australia. *BMC Health Serv Res* 2017;17:836.
27. Sonnenreich P, Geisler L. Covering the cost of the cure: from hepatitis C to cancer, new therapies are straining a system plagued by inefficiency. *P & T* 2016;41:565-89.
28. Stuart B, D'Onofrio CN, Boatman S, Feigelman G. CHOICES: promoting early access to end-of-life care through home-based transition management. *J Palliat Med* 2003;6:671-83.
29. Rees GH. Organisational readiness and Lean Thinking implementation: findings from three emergency department case studies in New Zealand. *Health Serv Manage Res* 2014;27:1-9.
30. Ammentorp J, Bigi S, Silverman J, Sator M, Gillen P, Ryan W, et al. Upscaling communication skills training - lessons learned from international initiatives. *Patient Educ Couns* 2021;104:352-9.
31. Braithwaite J, Marks D, Taylor N. Harnessing implementation science to improve care quality and patient safety: a systematic review of targeted literature. *Int J Qual Health Care* 2014;26:321-9.
32. Shigayeva A, Coker RJ. Communicable disease control programmes and health systems: an analytical approach to sustainability. *Health Policy Plan* 2015;30:368-85.
33. Fineberg HV. A successful and sustainable health system--how to get there from here. *N Engl J Med* 2012;366:1020-7.
34. Sepehri A, Chernomas R. Is the Canadian health care system fiscally sustainable? *Int J Health Serv* 2004;34:229-43.
35. Kerr R, Hendrie DV. Is capital investment in Australian hospitals effectively funding patient access to efficient public hospital care? *Aust Health Rev* 2018;23:23.
36. Buykx P, Humphreys JS, Tham R, Kinsman L, Wakerman J, Asaid A, et al. How do small rural primary health care services sustain themselves in a constantly changing health system environment? *BMC Health Serv Res* 2012;12:81.
37. Cashin A. The challenge of nurse innovation in the Australian context of universal health care. *Collegian* 2015;22:319-24.
38. Buttigieg SC. Innovation Strategies and Health System Guiding Principles to Address Equity and Sustainability in Responsible Innovation in Health Comment on "What Health System Challenges Should Responsible Innovation in Health Address? Insights From an International Scoping Review". *Int J Health Policy Manag* 2019;8:570-2.
39. Chambers DA, Glasgow RE, Stange KC. The dynamic sustainability framework: addressing the paradox of sustainment amid ongoing change. *Implement Sci* 2013;8.
40. Scheirer MA. Is sustainability possible? A review and commentary on empirical studies of program sustainability. *Am J Eval* 2005;26:320-47.
41. Gruen RL, Elliott JH, Nolan ML, Lawton PD, Parkhill A, McLaren CL, et al. Sustainability Science: an integrated approach for health-programme planning. *Lancet* 2008;372:1579-89.



42. Embi PJ, Richesson R, Tenenbaum J, Kannry J, Friedman C, Sarkar IN, et al. Reimagining the research-practice relationship: policy recommendations for informatics-enabled evidence-generation across the US health system. *JAMIA Open* 2019;2:2-9.
43. Enticott J, Braaf S, Johnson A, Jones A, Teede HJ. Leaders' perspectives on learning health systems: a qualitative study. *BMC Health Serv Res* 2020;20:1087.
44. Clancy C. Creating World-Class Care and Service for Our Nation's Finest: How Veterans Health Administration Diffusion of Excellence Initiative Is Innovating and Transforming Veterans Affairs Health Care. *Permanente Journal* 2019;23.
45. Kilbourne AM, Braganza MZ, Bowersox NW, Goodrich DE, Miake-Lye I, Floyd N, et al. Research Lifecycle to Increase the Substantial Real-world Impact of Research: Accelerating Innovations to Application. *Med Care* 2019;57 Suppl 10 Suppl 3:S206-s12.
46. Committee on the Learning Health Care System in A, Institute of M. In: Smith M, Saunders R, Stuckhardt L, McGinnis JM, editors. *Best Care at Lower Cost: The Path to Continuously Learning Health Care in America*. Washington (DC): National Academies Press (US); 2013.
47. Braithwaite J, Zurynski Y, Ludlow K, Holt J, Augustsson H, Campbell M. Towards sustainable healthcare system performance in the 21st century in high-income countries: a protocol for a systematic review of the grey literature. *BMJ Open* 2019;9:e025892.
48. Pereno A, Eriksson D. A multi-stakeholder perspective on sustainable healthcare: From 2030 onwards. *Futures* 2020;122:102605.
49. Crisp N. What would a sustainable health and care system look like? *BMJ* 2017;358:j3895.
50. Abimbola S, Baatiema L, Bigdeli M. The impacts of decentralization on health system equity, efficiency and resilience: a realist synthesis of the evidence. *Health Policy Plan* 2019;34:605-17.
51. Derakhshani N, Doshmangir L, Ahmadi A, Fakhri A, Sadeghi-Bazargani H, Gordeev VS. Monitoring Process Barriers and Enablers Towards Universal Health Coverage Within the Sustainable Development Goals: A Systematic Review and Content Analysis. *Clinicoecon Outcomes Res* 2020;12:459-72.
52. Buchan J. What difference does ("good") HRM make? *Hum Resour Health* 2004;2:6.
53. Buchan JM, Naccarella L, Brooks PM. Is health workforce sustainability in Australia and New Zealand a realistic policy goal? *Aust Health Rev* 2011;35:152-5.
54. Hovenga EJ. Impact of data governance on a nation's healthcare system building blocks. *Studies in Health Technology & Informatics* 2013;193:24-66.
55. Vainieri M, Noto G, Ferre F, Rosella LC. A Performance Management System in Healthcare for All Seasons? *Int J Environ Res Public Health* 2020;17.
56. Editorial. *Healthc Q* 2020;22:1-2.
57. Costa-Font J, Levaggi R. Innovation, aging, and health care: Unraveling "silver" from "red" herrings? *Health Econ* 2020;29 Suppl 1:3-7.
58. Craig N, Robinson M. Towards a preventative approach to improving health and reducing health inequalities: a view from Scotland. *Public Health* 2019;169:195-200.
59. Rosenberg-Yunger ZR, Daar AS, Singer PA, Martin DK. Healthcare sustainability and the challenges of innovation to biopharmaceuticals in Canada. *Health Policy* 2008;87:359-68.
60. Barasa EW, Cloete K, Gilson L. From bouncing back, to nurturing emergence: reframing the concept of resilience in health systems strengthening. *Health Policy Plan* 2017;32:iii91-iii4.
61. Lehoux P, Williams-Jones B, Miller F, Urbach D, Tailliez S. What leads to better health care innovation? Arguments for an integrated policy-oriented research agenda. *Journal of Health Services & Research Policy* 2008;13:251-4.
62. Thompson RE. Sustainability as the lynch pin of public policy and industry initiatives. *Physician Exec* 1998;24:52-5.
63. Mackenzie J. The old care paradigm is dead, long live the new sustainable care paradigm: how can GP commissioning consortia meet the demand challenges of 21st century healthcare? *London J Prim Care (Abingdon)* 2011;4:64-8.

64. Walsh K. Strengthening primary care: the role of e-learning. *Educ Prim Care* 2019;30:267-9.
65. Marcotte LM, Moriates C, Wolfson DB, Frankel RM. Professionalism as the Bedrock of High-Value Care. *Acad Med* 2020;95:864-7.
66. Garde S, Hullin CM, Chen R, Schuler T, Granz J, Knaup P, et al. Towards sustainability of health information systems: how can we define, measure and achieve it? *Stud Health Technol Inform* 2007;129:1179-83.
67. Barbazza E, Kringos D, Kruse I, Klazinga NS, Tello JE. Creating performance intelligence for primary health care strengthening in Europe. *BMC Health Serv Res* 2019;19:1006.
68. Kepros JP, Opreanu RC. A new model for health care delivery. *BMC Health Serv Res* 2009;9:57.
69. Dhalla I. Canada's health care system and the sustainability paradox. *Can Med Assoc J* 2007;177:51-3.
70. Solon O, Woo K, Quimbo SA, Shimkhada R, Florentino J, Peabody JW. A novel method for measuring health care system performance: experience from QIDS in the Philippines. *Health Policy Plan* 2009;24:167-74.
71. Molfenter T, Gustafson D, Kilo C, Bhattacharya A, Olsson J. Prospective evaluation of a Bayesian model to predict organizational change. *Health Care Manage Rev* 2005;30:270-9.
72. Birch S, Murphy GT, MacKenzie A, Cumming J. In place of fear: aligning health care planning with system objectives to achieve financial sustainability. *J Health Serv Res Policy* 2015;20:109-14.
73. Pacifico Silva H, Lehoux P, Miller FA, Denis JL. Introducing responsible innovation in health: a policy-oriented framework. *Health Res Policy Syst* 2018;16:90.
74. Lo Sardo DR, Thurner S, Sorger J, Duftschmid G, Endel G, Klimek P. Quantification of the resilience of primary care networks by stress testing the health care system. *Proceedings of the National Academy of Sciences of the United States of America* 2019;116:23930-5.
75. Shen H, Sui Y, Fu Y. Using social choice theory and acceptability analysis to measure the value of health systems. *PLoS One* 2020;15:e0235531.
76. Cunningham FC, Ranmuthugala G, Westbrook JI, Braithwaite J. Tackling the wicked problem of health networks: the design of an evaluation framework. *BMJ Open* 2019;9:e024231.
77. Wurcel V, Cicchetti A, Garrison L, Kip MMA, Koffijberg H, Kolbe A, et al. The Value of Diagnostic Information in Personalised Healthcare: A Comprehensive Concept to Facilitate Bringing This Technology into Healthcare Systems. *Public Health Genomics* 2019;22:8-15.
78. Shaw J, Wong I, Griffin B, Robertson M, Bhatia RS. Principles for health system capacity planning: insights for healthcare leaders. *Healthc Q* 2017;19:17-22.
79. Scott IA. Is modern medicine at risk of losing the plot? *Med J Aust* 2006;185:213-6.
80. Robertson TM, Lofgren RP. Where population health misses the mark: breaking the 80/20 rule. *Acad Med* 2015;90:277-8.
81. Pisco L, Pinto LF. From Alma-Ata to Astana: the path of Primary Health Care in Portugal, 1978-2018 and the genesis of Family Medicine. *Cien Saude Colet* 2020;25:1197-204.
82. Jessup RL, O'Connor DA, Putrik P, Rischin K, Nezon J, Cyril S, et al. Alternative service models for delivery of healthcare services in high-income countries: a scoping review of systematic reviews. *BMJ Open* 2019;9:e024385.
83. Rudnicka E, Napierała P, Podfigurina A, Męczekalski B, Smolarczyk R, Grymowicz M. The World Health Organization (WHO) approach to healthy ageing. *Maturitas* 2020;139:6-11.
84. Quaglio G, Figueras J, Mantoan D, Dawood A, Karapiperis T, Costongs C, et al. An overview of future EU health systems. An insight into governance, primary care, data collection and citizens' participation. *J Public Health (Oxf)* 2018;40:891-8.
85. Knutson DJ. The role of strategic alliances in ensuring health care quality: a health care system perspective. *Clin Ther* 1997;19:1572-8.
86. Delgado P. Meeting the challenge of chronic conditions in a sustainable manner: building on the AHC learning. *Healthc Pap* 2016;15 Spec No:90-5; discussion 7-123.



- 1  
2  
3 87. Veillard J, Denny K. Transformation through clinical and social integration: meeting the  
4 needs of high users of healthcare. *Healthc Pap* 2014;14:4-7.
- 5 88. Stoelwinder JU. Final report of the National Health and Hospitals Reform Commission: will  
6 we get the health care governance reform we need? *Med J Aust* 2009;191:387-8.
- 7 89. Stoelwinder JU, Paolucci F. Sustaining Medicare through consumer choice of health funds:  
8 lessons from the Netherlands. *Med J Aust* 2009;191:30-2.
- 9 90. Magnan S, Fisher E, Kindig D, Isham G, Wood D, Eustis M, et al. Achieving accountability for  
10 health and health care. *Minn Med* 2012;95:37-9.
- 11 91. Armstrong BK, Gillespie JA, Leeder SR, Rubin GL, Russell LM. Challenges in health and health  
12 care for Australia. *Med J Australia* 2007;187:485-9.
- 13 92. Ganann R, Peacock S, Garnett A, Northwood M, Hyde A, Bookey-Bassett S, et al. Capacity  
14 development among academic trainees in community-based primary health care research: The  
15 Aging, Community and Health Research Unit Experience. *Prim Health Care Res Dev* 2019;20:e139.
- 16 93. Al Dhawi AA, West DJ, Jr., Spinelli RJ, Gompf TA. The challenge of sustaining health care in  
17 Oman. *Health Care Manag* 2007;26:19-30.
- 18 94. Thistlethwaite JE, Dunston R, Yassine T. The times are changing: workforce planning, new  
19 health-care models and the need for interprofessional education in Australia. *J Interprof Care*  
20 2019;33:361-8.
- 21 95. Dunn PM, Arnetz BB, Christensen JF, Homer L. Meeting the imperative to improve physician  
22 well-being: assessment of an innovative program. *J Gen Intern Med* 2007;22:1544-52.
- 23 96. Woodward GL, Iverson A, Harvey R, Blake PG. Implementation of an agency to improve  
24 chronic kidney disease care in Ontario: lessons learned by the Ontario Renal Network. *Healthc Q*  
25 2015;17 Spec No:44-7.
- 26 97. Pencheon D. Making health care more sustainable: the case of the English NHS. *Public Health*  
27 2015;129:1335-43.
- 28 98. Lewis S. Can a learning-disabled nation learn healthcare lessons from abroad? *Healthc Policy*  
29 2007;3:19-28.
- 30 99. Edwards N, Rowan M, Marck P, Grinspun D. Understanding whole systems change in health  
31 care: the case of nurse practitioners in Canada. *Policy Polit Nurs Pract* 2011;12:4-17.
- 32 100. Lozano I, Rondan J, Vegas JM, Segovia E. Sustainability of the health system: beyond cost-  
33 effectiveness analyses. *Rev Esp Cardiol* 2016;69:880-1.
- 34 101. Farmanova E, Kirvan C, Verma J, Mukerji G, Akunov N, Phillips K, et al. Triple aim in Canada:  
35 developing capacity to lead to better health, care and cost. *Int J Qual Health Care* 2016;28:830-7.
- 36 102. Iskrov G, Stefanov R, Ferrelli RM. Health systems for rare diseases: financial sustainability.  
37 *Ann Ist Super Sanita* 2019;55:270-5.
- 38 103. Buttigieg SC, Schuetz M, Bezzina F. Value chains of public and private health-care services in  
39 a small EU island state: a SWOT analysis. *Public Health Front* 2016;4:201.
- 40 104. Atmore C. The role of medical generalism in the New Zealand health system into the future.  
41 *N Z Med J* 2015;128:50-5.
- 42 105. McGorry PD, Hamilton MP. Stepwise expansion of evidence-based care is needed for mental  
43 health reform. *Med J Aust* 2016;204:351-3.
- 44 106. Ehrlich C, Kendall E. Integrating collaborative place-based health promotion coalitions into  
45 existing health system structures: the experience from one Australian health coalition. *Int J Integr*  
46 *Care* 2015;15:e047.
- 47 107. Levine S, O'Mahony S, Baron A, Ansari A, Deamant C, Frader J, et al. Training the workforce:  
48 description of a longitudinal interdisciplinary education and mentoring program in palliative care. *J*  
49 *Pain Symptom Manage* 2017;53:728-37.
- 50 108. Lega F, Prenestini A, Spurgeon P. Is management essential to improving the performance  
51 and sustainability of health care systems and organizations? a systematic review and a roadmap for  
52 future studies. *Value Health* 2013;16:S46-S51.
- 53  
54  
55  
56  
57  
58  
59  
60

- 1  
2  
3 109. Wakerman J, Humphreys JS. Sustainable workforce and sustainable health systems for rural  
4 and remote Australia. *Med J Aust* 2013;199:S14-7.
- 5 110. Wakerman J, Humphreys JS. Sustainable primary health care services in rural and remote  
6 areas: innovation and evidence. *Aust J Rural Health* 2011;19:118-24.
- 7 111. Lehoux P, Roncarolo F, Silva HP, Boivin A, Denis JL, Hébert R. What Health System  
8 Challenges Should Responsible Innovation in Health Address? Insights From an International  
9 Scoping Review. *Int J Health Policy Manag* 2019;8:63-75.
- 10 112. Braithwaite J, Vincent C, Nicklin W, Amalberti R. Coping with more people with more illness.  
11 Part 2: new generation of standards for enabling healthcare system transformation and  
12 sustainability. *Int J Qual Health Care* 2019;31:159-63.
- 13 113. Tsisis P. Chronic disease management and the home-care alternative in Ontario, Canada.  
14 *Health Serv Manage Res* 2009;22:136-9.
- 15 114. Niraula S. Strategizing health technology assessment for containment of cancer drug costs in  
16 a universal health care system: Case of the pan-Canadian Oncology Drug Review. *Cancer*  
17 2019;125:3100-3.
- 18 115. Bentley C, Peacock S, Abelson J, Burgess MM, Demers-Payette O, Longstaff H, et al.  
19 Addressing the affordability of cancer drugs: using deliberative public engagement to inform health  
20 policy. *Health Res Policy Syst* 2019;17:17.
- 21 116. Rosser M. Advancing health system integration through supply chain improvement. *Healthc*  
22 *Q* 2006;9:62-6, 4.
- 23 117. Guyon A, Hancock T, Kirk M, MacDonald M, Neudorf C, Sutcliffe P, et al. The weakening of  
24 public health: a threat to population health and health care system sustainability. *Can J Public Health*  
25 2017;108:e1-e6.
- 26 118. Bessler JS, Ellies M. Values and value--a vision for the Australian health care system. *Aust*  
27 *Health Rev* 1995;18:6-17; discussion 8-29.
- 28 119. Ferrelli RM, Fantini B, Taruscio D. Health systems sustainability for rare diseases. Preface.  
29 *Ann Ist Super Sanita* 2019;55:249-50.
- 30 120. Bogaert P, van Oers H, Van Oyen H. Towards a sustainable EU health information system  
31 infrastructure: A consensus driven approach. *Health Policy* 2018.
- 32 121. Fridell M, Edwin S, von Schreeb J, Saulnier DD. Health System Resilience: What Are We  
33 Talking About? A Scoping Review Mapping Characteristics and Keywords. *Int J Health Policy Manag*  
34 2020;9:6-16.
- 35 122. Casale CR, Clancy CM. Commentary: Not about us without us. *Acad Med* 2009;84:1333-5.
- 36 123. Nagle LM, Pitts BM. Citizen perspectives on the future of healthcare. *Healthc Q* 2012;15:40-5.
- 37 124. Schwann NM, Bretz KA, Eid S, Burger T, Fry D, Ackler F, et al. Point-of-care electronic  
38 prompts: an effective means of increasing compliance, demonstrating quality, and improving  
39 outcome. *Anesth Analg* 2011;113:869-76.
- 40 125. Huynh AK, Hamilton AB, Farmer MM, Bean-Mayberry B, Stirman SW, Moin T, et al. A  
41 pragmatic approach to guide implementation evaluation research: strategy mapping for complex  
42 interventions. *Public Health Front* 2018;6.
- 43 126. Kilbourne AM, Braganza MZ, Bowersox NW, Goodrich DE, Miake-Lye I, Floyd N, et al.  
44 Research Lifecycle to Increase the Substantial Real-world Impact of Research: Accelerating  
45 Innovations to Application. *Medical Care* 2019;57 Suppl 10 Suppl 3:S206-S12.
- 46 127. Greenhalgh T, Macfarlane F, Barton-Sweeney C, Woodard F. "If we build it, will it stay?" A  
47 case study of the sustainability of whole-system change in London. *Milbank Q* 2012;90:516-47.
- 48 128. McVeigh J, MacLachlan M, Gilmore B, McClean C, Eide AH, Mannan H, et al. Promoting good  
49 policy for leadership and governance of health related rehabilitation: a realist synthesis. *Glob Health*  
50 2016;12:49.
- 51 129. De Santis M. Integrated care for healthcare sustainability for patients living with rare  
52 diseases. *Ann Ist Super Sanita* 2019;55:276-82.
- 53  
54  
55  
56  
57  
58  
59  
60

- 1  
2  
3 130. McIntosh E, Nagelkerk J, Vonderheid SC, Poole M, Dontje K, Pohl JM. Financially viable nurse-  
4 managed centers. *Nurse Pract* 2003;28:40, 6-8, 51.
- 5 131. Wutzke S, Benton M, Verma R. Towards the implementation of large scale innovations in  
6 complex health care systems: views of managers and frontline personnel. *BMC Res Notes*  
7 2016;9:327.
- 8 132. Burgess LH, Cohen MR, Denham CR. A new leadership role for pharmacists: a prescription  
9 for change. *J Patient Saf* 2010;6:31-7.
- 10 133. Hanney S, Kanya L, Pokhrel S, Jones T, Boaz A. WHO Health Evidence Network Synthesis  
11 Reports. What is the evidence on policies, interventions and tools for establishing and/or  
12 strengthening national health research systems and their effectiveness? Copenhagen: WHO Regional  
13 Office for Europe; 2020.
- 14 134. Braithwaite J, Glaziou P, Westbrook J. The three numbers you need to know about  
15 healthcare: the 60-30-10 Challenge. *BMC Med* 2020;18.
- 16 135. Braithwaite J, Churrua K, Long JC, Ellis LA, Herkes J. When complexity science meets  
17 implementation science: a theoretical and empirical analysis of systems change. *BMC Med*  
18 2018;16:63.
- 19 136. Bramesfeld A, Amaddeo F, Caldas-de-Almeida J, Cardoso G, Depaigne-Loth A, Derenne R, et  
20 al. Monitoring mental healthcare on a system level: country profiles and status from EU countries.  
21 *Health Policy* 2016;120:706-17.
- 22 137. Tricco AC, Ashoor HM, Cardoso R, MacDonald H, Cogo E, Kastner M, et al. Sustainability of  
23 knowledge translation interventions in healthcare decision-making: a scoping review. *Implement Sci*  
24 2016;11:55.  
25  
26  
27  
28  
29  
30  
31  
32  
33  
34  
35  
36  
37  
38  
39  
40  
41  
42  
43  
44  
45  
46  
47  
48  
49  
50  
51  
52  
53  
54  
55  
56  
57  
58  
59  
60

1  
2  
3 **Figure titles legends and footnotes**  
4

5  
6 **FIGURE 1.**  
7

8  
9 **Title:**  
10

11  
12 **Figure 1.** PRISMA flow diagram summarising the review and reasons for article exclusion\*  
13

14  
15 **Footnotes:**  
16

17  
18 \*Full text articles and snowballed articles excluded for the following reasons. Note that some  
19 articles were excluded for multiple reasons. Reasons for article exclusion are below:  
20

| <b>Reason</b>                                                                                                                                      | <b>Excluded at<br/>title/abstract<br/>screening<br/>(N)</b> | <b>Excluded at<br/>full text<br/>review<br/>(N)</b> |
|----------------------------------------------------------------------------------------------------------------------------------------------------|-------------------------------------------------------------|-----------------------------------------------------|
| Disaster or emergency                                                                                                                              | 199                                                         | 3                                                   |
| Foreign aid, equity, or community healthcare                                                                                                       | 598                                                         | 20                                                  |
| Occupational health and safety                                                                                                                     | 69                                                          | 2                                                   |
| Environmental sustainability                                                                                                                       | 89                                                          | 5                                                   |
| Not relevant to Australia e.g. low-resource setting                                                                                                | 730                                                         | 82                                                  |
| Not about systems e.g., single disease or program                                                                                                  | 1291                                                        | 109                                                 |
| Preventative e.g., regarding vaccination or nutrition                                                                                              | 277                                                         | 18                                                  |
| Not relating to healthcare delivery e.g., regarding animal care or food safety                                                                     | 46                                                          | 0                                                   |
| Regarding physiology/pharmacology                                                                                                                  | 44                                                          | 0                                                   |
| Does not in another way define, measure, identify challenges, opportunities for improvement or scale up of sustainability in the healthcare system | 398                                                         | 166                                                 |
| Other e.g., article not written in English, full text not available                                                                                | 4                                                           | 95                                                  |

1  
2  
3  
4  
5  
6  
7  
8  
9  
10  
11  
12  
13  
14  
15  
16  
17  
18  
19  
20  
21  
22  
23  
24  
25  
26  
27  
28  
29  
30  
31  
32  
33  
34  
35  
36  
37  
38  
39  
40  
41  
42  
43  
44  
45  
46  
47  
48  
49  
50  
51  
52  
53  
54  
55  
56  
57  
58  
59  
60

For peer review only

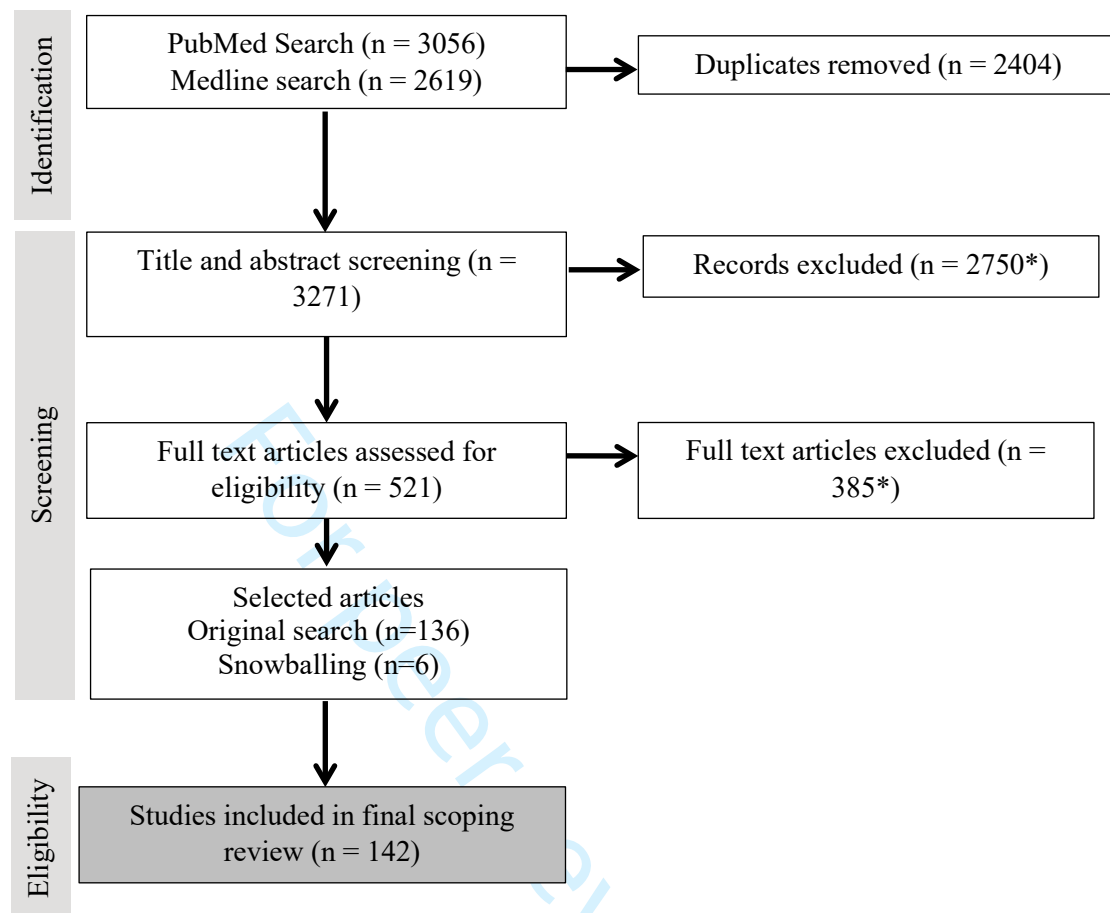

1  
2  
3  
4  
5  
6  
7  
8  
9  
10  
11  
12  
13  
14  
15  
16  
17  
18  
19  
20  
21  
22  
23  
24  
25  
26  
27  
28  
29  
30  
31  
32  
33  
34  
35  
36  
37  
38  
39  
40  
41  
42  
43  
44  
45  
46  
47  
48  
49  
50  
51  
52  
53  
54  
55  
56  
57  
58  
59  
60

## HOW CAN THE HEALTHCARE SYSTEM DELIVER SUSTAINABLE PERFORMANCE? A SCOPING REVIEW

### ADDITIONAL FILE 1: SEARCH STRATEGY

|                   | <b>PubMed</b>                                                                                                                                                                                                 | <b>Ovid Medline</b>                                                                                                                           |
|-------------------|---------------------------------------------------------------------------------------------------------------------------------------------------------------------------------------------------------------|-----------------------------------------------------------------------------------------------------------------------------------------------|
|                   | ((sustainab*[Title/Abstract])<br>OR resilien*[Title/Abstract]) AND (((("health system*" [Title/Abstract]) OR "health system* performance" [Title/Abstract]) OR "health system* improvement" [Title/Abstract]) | "health system* performance"<br>"health system* improvement"<br>(health adj3 system)<br>1 OR 2 OR 3<br>(sustainab* OR resilience*)<br>4 AND 5 |
| Additional Limits | English Language                                                                                                                                                                                              | English Language                                                                                                                              |
| Yield             | 3056 articles                                                                                                                                                                                                 | 2619 articles                                                                                                                                 |

**HOW CAN THE HEALTHCARE SYSTEM DELIVER SUSTAINABLE PERFORMANCE?  
A SCOPING REVIEW**

**ADDITIONAL FILE 2: SUMMARY OF INCLUDED PAPERS**

**Summary of included studies in scoping review and reasons for inclusion**

| <i>Article demographics</i>                            |             |                |               | <i>Reason for article inclusion and summary of results</i> |                          |                                                                                          |                                                                                                |                                                                                                                                           |                 |
|--------------------------------------------------------|-------------|----------------|---------------|------------------------------------------------------------|--------------------------|------------------------------------------------------------------------------------------|------------------------------------------------------------------------------------------------|-------------------------------------------------------------------------------------------------------------------------------------------|-----------------|
| <b>Reference</b>                                       | <b>Year</b> | <b>Country</b> | <b>Type *</b> | <b>1. Definition of SPHS</b>                               | <b>2. Measuring SPHS</b> | <b>3. Challenges to SPHS</b>                                                             | <b>4. Improvements to SPHS</b>                                                                 | <b>5. Sustaining or scaling change for SPHS</b>                                                                                           | <b>6. Other</b> |
| Al Dhawi AA, West DJ, Jr., Spinelli RJ, Gompf TA. 2007 | 2007        | Oman           | ED            |                                                            |                          | Increased consumer expectations, increased medication costs, and resource constraints    | The environment, financial sustainability, institutional sustainability, demand sustainability | The need to examine the entire system: social, economic, and environmental determinants of health to sustain changes in the health system |                 |
| Amalberti , R., W. Nicklin, and J. Braithwait e. 2016. | 2016        | Worldwide      | ED            |                                                            |                          | Ageing population, patients with comorbidities, and expensive health conditions to treat |                                                                                                |                                                                                                                                           |                 |
| Ament SMC,                                             | 2014        | Netherlands    | EM            |                                                            |                          |                                                                                          |                                                                                                | The importance of internal                                                                                                                |                 |



| <i>Article demographics</i>                                                   |      |           |        | <i>Reason for article inclusion and summary of results</i> |                   |                                                                                                                                                                                                                                            |                                                                                              |                                                                                                      |          |
|-------------------------------------------------------------------------------|------|-----------|--------|------------------------------------------------------------|-------------------|--------------------------------------------------------------------------------------------------------------------------------------------------------------------------------------------------------------------------------------------|----------------------------------------------------------------------------------------------|------------------------------------------------------------------------------------------------------|----------|
| Reference                                                                     | Year | Country   | Type * | 1. Definition of SPHS                                      | 2. Measuring SPHS | 3. Challenges to SPHS                                                                                                                                                                                                                      | 4. Improvements to SPHS                                                                      | 5. Sustaining or scaling change for SPHS                                                             | 6. Other |
| Gillissen F, Moser A, Maessen JMC, Dirksen CD, von Meyenfeldt MF, et al. 2014 |      |           |        |                                                            |                   |                                                                                                                                                                                                                                            |                                                                                              | auditing and feedback of outcomes, (e.g., reminders and meetings), changing organisational structure |          |
| Armstrong BK, Gillespie JA, Leeder SR, Rubin GL, Russell LM. 2007             | 2007 | Australia | ED     |                                                            |                   | 1. Demography of disease and ageing population; 2. Increasing medical cost; 3. Health workforce supply and distribution; 4. Problems with the quality and safety; 5. Balancing private and public health; 6. Recognition in the importance | Solutions must include elements of prevention, and primary and acute rehabilitation services |                                                                                                      |          |

1  
2  
3  
4  
5  
6  
7  
8  
9  
10  
11  
12  
13  
14  
15  
16  
17  
18  
19  
20  
21  
22  
23  
24  
25  
26  
27  
28  
29  
30  
31  
32  
33  
34  
35  
36  
37  
38  
39  
40  
41  
42  
43  
44  
45  
46  
47

| <i>Article demographics</i>         |             |                |               | <i>Reason for article inclusion and summary of results</i> |                          |                                                                                                                         |                                                                                                                        |                                                 |                 |
|-------------------------------------|-------------|----------------|---------------|------------------------------------------------------------|--------------------------|-------------------------------------------------------------------------------------------------------------------------|------------------------------------------------------------------------------------------------------------------------|-------------------------------------------------|-----------------|
| <b>Reference</b>                    | <b>Year</b> | <b>Country</b> | <b>Type *</b> | <b>1. Definition of SPHS</b>                               | <b>2. Measuring SPHS</b> | <b>3. Challenges to SPHS</b>                                                                                            | <b>4. Improvements to SPHS</b>                                                                                         | <b>5. Sustaining or scaling change for SPHS</b> | <b>6. Other</b> |
|                                     |             |                |               |                                                            |                          | of investing in the health of the next generation; 7. Urban planning for sustainable communities; 8. Inequity in health |                                                                                                                        |                                                 |                 |
| Atmore C. 2015                      | 2015        | New Zealand    | ED            |                                                            |                          | Doctors are becoming more specialised, but needs to become more generalist to look after the whole person               | Transalpine service model (developed in a rural NZ hospital) provides options for sustainable healthcare in the future |                                                 |                 |
| Barasa EW, Cloete K, Gilson L. 2017 | 2017        | Worldwide      | ED            | Resilience is an important quality for creative adaptation |                          | The challenge of thinking of everyday resilience rather than just crises                                                |                                                                                                                        |                                                 |                 |
| Bessler JS, Ellies M. 1995          | 1995        | Australia      | ED            |                                                            |                          | Admissions rise, and doctors are using technology more regularly. Public                                                | Need to decrease the number of beds in the public hospitals (as 15% of inpatients should not be,                       |                                                 |                 |

| <i>Article demographics</i>                      |      |           |        | <i>Reason for article inclusion and summary of results</i> |                                                                                                                                                                                  |                                                                                                                                                                        |                                                                                                                                                                |                                          |          |
|--------------------------------------------------|------|-----------|--------|------------------------------------------------------------|----------------------------------------------------------------------------------------------------------------------------------------------------------------------------------|------------------------------------------------------------------------------------------------------------------------------------------------------------------------|----------------------------------------------------------------------------------------------------------------------------------------------------------------|------------------------------------------|----------|
| Reference                                        | Year | Country   | Type * | 1. Definition of SPHS                                      | 2. Measuring SPHS                                                                                                                                                                | 3. Challenges to SPHS                                                                                                                                                  | 4. Improvements to SPHS                                                                                                                                        | 5. Sustaining or scaling change for SPHS | 6. Other |
|                                                  |      |           |        |                                                            |                                                                                                                                                                                  | expenditure on healthcare has remained 'flat' but private healthcare premiums continue to escalate                                                                     | according to research), increase continuity of patient care (termed 'integrated networks'), and have less of a divide between state and federal health systems |                                          |          |
| Birch S, Murphy GT, MacKenzie A, Cumming J. 2015 | 2015 | Worldwide | ED     |                                                            | Healthcare sustainability framework (HCSF), showing the relationship between expenditure levels, the determinants of expenditure, revenues to support the healthcare system, and | The unintended consequences of redistributing cost of care and responding to the needs of the population e.g., redistributes what socio-economic groups use healthcare | Sustainability frameworks should consider the needs and trends of the population, the work force, financial and service information                            |                                          |          |

1  
2  
3  
4  
5  
6  
7  
8  
9  
10  
11  
12  
13  
14  
15  
16  
17  
18  
19  
20  
21  
22  
23  
24  
25  
26  
27  
28  
29  
30  
31  
32  
33  
34  
35  
36  
37  
38  
39  
40  
41  
42  
43  
44  
45  
46  
47

| <i>Article demographics</i>                                                                 |             |                          |               | <i>Reason for article inclusion and summary of results</i>             |                                                                 |                                                                                |                                                                                          |                                                                                                                                                  |                 |
|---------------------------------------------------------------------------------------------|-------------|--------------------------|---------------|------------------------------------------------------------------------|-----------------------------------------------------------------|--------------------------------------------------------------------------------|------------------------------------------------------------------------------------------|--------------------------------------------------------------------------------------------------------------------------------------------------|-----------------|
| <b>Reference</b>                                                                            | <b>Year</b> | <b>Country</b>           | <b>Type *</b> | <b>1. Definition of SPHS</b>                                           | <b>2. Measuring SPHS</b>                                        | <b>3. Challenges to SPHS</b>                                                   | <b>4. Improvements to SPHS</b>                                                           | <b>5. Sustaining or scaling change for SPHS</b>                                                                                                  | <b>6. Other</b> |
|                                                                                             |             |                          |               |                                                                        | their relationship to fiscal and political sustainability       |                                                                                |                                                                                          |                                                                                                                                                  |                 |
| Braithwaite, J., D. Marks, and N. Taylor. 2014                                              | 2014        | Australia                | RA            | Sustainability defined as the mid-to-long-term acceptance of a program |                                                                 | Looks at the need to improve implementation science, leading to sustainability | Sustainability was one of eight key factors in implementing changes in the health system | Sustainability needs to be considered from the inception of change programs and projects, and there needs to be commitment at a managerial level |                 |
| Bramesfeld, A., F. Amaddeo, J. Caldas-de-Almeida, G. Cardoso, A. Depaigne-Loth, R. Derenne, | 2016        | European Union Countries | EM            |                                                                        | Measure and compare different countries using the QMP-MHC scale | Recognises the challenge of bridging policy and practice                       |                                                                                          |                                                                                                                                                  |                 |

| <i>Article demographics</i>              |      |                           |        | <i>Reason for article inclusion and summary of results</i>                              |                                                                                        |                                                                                                                                                                                                                                                                          |                         |                                           |          |
|------------------------------------------|------|---------------------------|--------|-----------------------------------------------------------------------------------------|----------------------------------------------------------------------------------------|--------------------------------------------------------------------------------------------------------------------------------------------------------------------------------------------------------------------------------------------------------------------------|-------------------------|-------------------------------------------|----------|
| Reference                                | Year | Country                   | Type * | 1. Definition of SPHS                                                                   | 2. Measuring SPHS                                                                      | 3. Challenges to SPHS                                                                                                                                                                                                                                                    | 4. Improvements to SPHS | 5. Sustaining or scaling change for SPHS  | 6. Other |
| V. Donisi et al. 2016.                   |      |                           |        |                                                                                         |                                                                                        |                                                                                                                                                                                                                                                                          |                         |                                           |          |
| Buchan J. 2004.                          | 2004 | Worldwide                 | ED     | Argues that a HR policy is central to any sustainable health system performance changes | Must be sector specific measures e.g., staff per occupied bed, patient acuity measures | The lack of consistent human resource management (HRM), as well as lack of being able to fit HRM to organisational characteristics, context and priorities, and link this to sustainable improvements. No single intervention is likely to be effective in all contexts. |                         | There is low take-up of HRM interventions |          |
| Buchan JM, Naccarella L, Brooks PM. 2011 | 2011 | Australia and New Zealand | ED     | The ability for Australia and New Zealand to train enough                               | Measurement is limited, e.g., can see if healthcare staff have                         | Brings into question attitudes of the country towards skilled                                                                                                                                                                                                            |                         |                                           |          |

1  
2  
3  
4  
5  
6  
7  
8  
9  
10  
11  
12  
13  
14  
15  
16  
17  
18  
19  
20  
21  
22  
23  
24  
25  
26  
27  
28  
29  
30  
31  
32  
33  
34  
35  
36  
37  
38  
39  
40  
41  
42  
43  
44  
45  
46  
47

| <i>Article demographics</i>           |             |                |               | <i>Reason for article inclusion and summary of results</i>                                                               |                                                                                                                 |                                                                                                                                                                                                                                                  |                                                                                                                                              |                                                                                                                              |                 |
|---------------------------------------|-------------|----------------|---------------|--------------------------------------------------------------------------------------------------------------------------|-----------------------------------------------------------------------------------------------------------------|--------------------------------------------------------------------------------------------------------------------------------------------------------------------------------------------------------------------------------------------------|----------------------------------------------------------------------------------------------------------------------------------------------|------------------------------------------------------------------------------------------------------------------------------|-----------------|
| <b>Reference</b>                      | <b>Year</b> | <b>Country</b> | <b>Type *</b> | <b>1. Definition of SPHS</b>                                                                                             | <b>2. Measuring SPHS</b>                                                                                        | <b>3. Challenges to SPHS</b>                                                                                                                                                                                                                     | <b>4. Improvements to SPHS</b>                                                                                                               | <b>5. Sustaining or scaling change for SPHS</b>                                                                              | <b>6. Other</b> |
|                                       |             |                |               | health staff to fill the positions for their front-line health staff to reduce the reliance on international recruitment | received a qualification from a country outside Australia, but not how long they have been working in Australia | personnel, immigration, funding of the education sector to train new health personnel (and the time commitment to train new health professionals must also be considered, as must the benefits of overseas personnel for national policy makers) |                                                                                                                                              |                                                                                                                              |                 |
| Burgess LH, Cohen MR, Denham CR. 2010 | 2010        | Worldwide      | ED            |                                                                                                                          |                                                                                                                 | Minimizing adverse drug events (ADEs) (and therefore readmissions) by having pharmacist leaders                                                                                                                                                  | Pharmacists need to become leaders to change hospital organisational and safety culture, working within an inter-disciplinary team to ensure | Pharmacists should be involved in medication counselling during the discharge process, and follow-up after the transition to |                 |

| <i>Article demographics</i>              |      |         |        | <i>Reason for article inclusion and summary of results</i> |                   |                                                                                                             |                                                                                                                                                                                                                                                                                   |                                          |          |
|------------------------------------------|------|---------|--------|------------------------------------------------------------|-------------------|-------------------------------------------------------------------------------------------------------------|-----------------------------------------------------------------------------------------------------------------------------------------------------------------------------------------------------------------------------------------------------------------------------------|------------------------------------------|----------|
| Reference                                | Year | Country | Type * | 1. Definition of SPHS                                      | 2. Measuring SPHS | 3. Challenges to SPHS                                                                                       | 4. Improvements to SPHS                                                                                                                                                                                                                                                           | 5. Sustaining or scaling change for SPHS | 6. Other |
|                                          |      |         |        |                                                            |                   |                                                                                                             | medication and medication issues are managed appropriately. Should also establish a medication review board to investigate near misses, being engaged in teamwork and communication, helping implement computerized systems, and being involved in patient training for discharge | home after hospital discharge            |          |
| Buttigieg SC, Schuetz M, Bezzina F. 2016 | 2016 | Malta   | EM     |                                                            |                   | The need for public and private hospital services to work together to solve complex healthcare problems and | Collaboration between private and public sectors may involve: 1. a regulated semi-competitive health model, whereby the                                                                                                                                                           |                                          |          |

1  
2  
3  
4  
5  
6  
7  
8  
9  
10  
11  
12  
13  
14  
15  
16  
17  
18  
19  
20  
21  
22  
23  
24  
25  
26  
27  
28  
29  
30  
31  
32  
33  
34  
35  
36  
37  
38  
39  
40  
41  
42  
43  
44  
45  
46  
47

| <i>Article demographics</i>                |             |                |               | <i>Reason for article inclusion and summary of results</i>                                                                                        |                          |                                                                                                                                                               |                                                                                                                                                                                                                                             |                                                                                      |                 |
|--------------------------------------------|-------------|----------------|---------------|---------------------------------------------------------------------------------------------------------------------------------------------------|--------------------------|---------------------------------------------------------------------------------------------------------------------------------------------------------------|---------------------------------------------------------------------------------------------------------------------------------------------------------------------------------------------------------------------------------------------|--------------------------------------------------------------------------------------|-----------------|
| <b>Reference</b>                           | <b>Year</b> | <b>Country</b> | <b>Type *</b> | <b>1. Definition of SPHS</b>                                                                                                                      | <b>2. Measuring SPHS</b> | <b>3. Challenges to SPHS</b>                                                                                                                                  | <b>4. Improvements to SPHS</b>                                                                                                                                                                                                              | <b>5. Sustaining or scaling change for SPHS</b>                                      | <b>6. Other</b> |
|                                            |             |                |               |                                                                                                                                                   |                          | benefit both entities                                                                                                                                         | government sets costs (e.g., for specific tests) and citizens are encouraged to invest in private health insurance; 2. Public-private mix model, which makes care more comprehensive and complete; or 3. Public-private partnerships (PPPs) |                                                                                      |                 |
| Buykx P, Humphreys JS, Tham R, et al. 2012 | 2012        | Australia      | EM            | Providing appropriate and cost-effective care in a way that persists in or can adapt to environment. Should also positively influence the broader |                          | In rural health services, sustainability is threatened by small population size and lack of economy of scale, poorly management structures, low socioeconomic |                                                                                                                                                                                                                                             | Rural health services are enabled by supportive policy and state and federal support |                 |



| <i>Article demographics</i> |      |                          |        | <i>Reason for article inclusion and summary of results</i>                                                          |                   |                                                                                                                                    |                                                                                                                                                                |                                                                                                                            |          |
|-----------------------------|------|--------------------------|--------|---------------------------------------------------------------------------------------------------------------------|-------------------|------------------------------------------------------------------------------------------------------------------------------------|----------------------------------------------------------------------------------------------------------------------------------------------------------------|----------------------------------------------------------------------------------------------------------------------------|----------|
| Reference                   | Year | Country                  | Type * | 1. Definition of SPHS                                                                                               | 2. Measuring SPHS | 3. Challenges to SPHS                                                                                                              | 4. Improvements to SPHS                                                                                                                                        | 5. Sustaining or scaling change for SPHS                                                                                   | 6. Other |
|                             |      |                          |        | sustainability of the wider community                                                                               |                   | groups, and geographic isolation                                                                                                   |                                                                                                                                                                |                                                                                                                            |          |
| Casale CR, Clancy CM. 2009  | 2009 | United States of America | ED     |                                                                                                                     |                   |                                                                                                                                    | Improving equity in health through community-based participatory research (CBPR). A component of this research is to plan for long-term process and commitment |                                                                                                                            |          |
| Cashin A. 2015              | 2015 | Australia                | ED     | A health system must address all aspects of its sustainability , including financial, social and political elements |                   | Being unsure if future conservative governments could threaten universal healthcare, and encouraging nurse innovation in Australia |                                                                                                                                                                | Issue of encouraging government support that will be politically costly in the short-term, but beneficial in the long term |          |

1  
2  
3  
4  
5  
6  
7  
8  
9  
10  
11  
12  
13  
14  
15  
16  
17  
18  
19  
20  
21  
22  
23  
24  
25  
26  
27  
28  
29  
30  
31  
32  
33  
34  
35  
36  
37  
38  
39  
40  
41  
42  
43  
44  
45  
46  
47

| <i>Article demographics</i>              |             |                          |               | <i>Reason for article inclusion and summary of results</i>                                                                                                    |                                                                                                                                                         |                                                                                                                                                                                                                                                                                              |                                                                                                                                                                                                                                                                |                                                 |                 |
|------------------------------------------|-------------|--------------------------|---------------|---------------------------------------------------------------------------------------------------------------------------------------------------------------|---------------------------------------------------------------------------------------------------------------------------------------------------------|----------------------------------------------------------------------------------------------------------------------------------------------------------------------------------------------------------------------------------------------------------------------------------------------|----------------------------------------------------------------------------------------------------------------------------------------------------------------------------------------------------------------------------------------------------------------|-------------------------------------------------|-----------------|
| <b>Reference</b>                         | <b>Year</b> | <b>Country</b>           | <b>Type *</b> | <b>1. Definition of SPHS</b>                                                                                                                                  | <b>2. Measuring SPHS</b>                                                                                                                                | <b>3. Challenges to SPHS</b>                                                                                                                                                                                                                                                                 | <b>4. Improvements to SPHS</b>                                                                                                                                                                                                                                 | <b>5. Sustaining or scaling change for SPHS</b> | <b>6. Other</b> |
| Chambers DA, Glasgow RE, Stange KC. 2013 | 2013        | Worldwide                | ED            | The continued positive effects of the intervention after the external funding have ended. This is expected to be constantly evaluated, developed and improved | The dynamic sustainability framework (DSF) was created to investigate the fit between the intervention, the practice setting, and the ecological system | Two assumptions of sustaining interventions are challenged: 1. 'voltage drop' where interventions yield lower benefits as they are put into practice outside a laboratory setting; and 2. 'program drift' where programs become less effective due to changes in protocol as it is delivered | Ensure focus on sustainability from the beginning of implementation of the intervention, rather than post-implementation. The setting for the intervention is also important e.g., it should focus on organisational learning, stakeholders should be involved |                                                 |                 |
| Cho CC, Ramanan RA, Feldman MD. 2011     | 2011        | United States of America | EM            |                                                                                                                                                               | Used analysis of nomination letters for mentor awards to analyse what it is to be a good mentor                                                         |                                                                                                                                                                                                                                                                                              | Through mentors being role models and legacies for the future                                                                                                                                                                                                  |                                                 |                 |

| <i>Article demographics</i> |      |                |        | <i>Reason for article inclusion and summary of results</i>                                                                                               |                                                                                              |                                                                                                                                                                                     |                                                                    |                                                                                                                    |          |
|-----------------------------|------|----------------|--------|----------------------------------------------------------------------------------------------------------------------------------------------------------|----------------------------------------------------------------------------------------------|-------------------------------------------------------------------------------------------------------------------------------------------------------------------------------------|--------------------------------------------------------------------|--------------------------------------------------------------------------------------------------------------------|----------|
| Reference                   | Year | Country        | Type * | 1. Definition of SPHS                                                                                                                                    | 2. Measuring SPHS                                                                            | 3. Challenges to SPHS                                                                                                                                                               | 4. Improvements to SPHS                                            | 5. Sustaining or scaling change for SPHS                                                                           | 6. Other |
| Coiera E, Hovenga EJ. 2007  | 2007 | Worldwide      | ED     | Health systems need to be adaptable to changing contexts and strive to be environmentally sustainable                                                    | Making it easier to measure sustainability through increasing transparency in work processes | Financial challenges of healthcare costing more than expected, treating higher volumes of patients with more comorbidities and higher expectations of care, and workforce shortages | Digitisation to cut costs e.g., telemedicine to reduce travel time |                                                                                                                    |          |
| Crisp N. 2017               | 2017 | United Kingdom | ED     | Internal factors (1. efficiency & effectiveness of healthcare provision, 2. availability of well-trained health staff, 3. cost); external (4. population |                                                                                              | Long term chronic conditions, especially the growing population of elderly with needs for community care                                                                            |                                                                    | The need of the health and care system to be strengthened by support from communities and multi-sectorial partners |          |

1  
2  
3  
4  
5  
6  
7  
8  
9  
10  
11  
12  
13  
14  
15  
16  
17  
18  
19  
20  
21  
22  
23  
24  
25  
26  
27  
28  
29  
30  
31  
32  
33  
34  
35  
36  
37  
38  
39  
40  
41  
42  
43  
44  
45  
46  
47

| <i>Article demographics</i> |             |                |               | <i>Reason for article inclusion and summary of results</i>                                                                                                                  |                          |                                                                                                                        |                                |                                                 |                 |
|-----------------------------|-------------|----------------|---------------|-----------------------------------------------------------------------------------------------------------------------------------------------------------------------------|--------------------------|------------------------------------------------------------------------------------------------------------------------|--------------------------------|-------------------------------------------------|-----------------|
| <b>Reference</b>            | <b>Year</b> | <b>Country</b> | <b>Type *</b> | <b>1. Definition of SPHS</b>                                                                                                                                                | <b>2. Measuring SPHS</b> | <b>3. Challenges to SPHS</b>                                                                                           | <b>4. Improvements to SPHS</b> | <b>5. Sustaining or scaling change for SPHS</b> | <b>6. Other</b> |
|                             |             |                |               | health, 5. contribution of carers and informal networks of care, 6. integration of policies and practices), and overall (7. public and political acceptability and support) |                          |                                                                                                                        |                                |                                                 |                 |
| De Rosis S, Nuti S. 2018    | 2018        | Italy          | EM            |                                                                                                                                                                             |                          | Lack of a national or regional office responsible for project coordination. Longer-term financial investment is needed |                                |                                                 |                 |
| Delgado, P. 2016            | 2016        | Canada         | ED            |                                                                                                                                                                             |                          | Quality improvement collaborative systems did not                                                                      |                                |                                                 |                 |

| <i>Article demographics</i>                          |      |                          |        | <i>Reason for article inclusion and summary of results</i> |                                                                                                                                          |                                                                                                                                                                                              |                                                                                      |                                                                                                                           |          |
|------------------------------------------------------|------|--------------------------|--------|------------------------------------------------------------|------------------------------------------------------------------------------------------------------------------------------------------|----------------------------------------------------------------------------------------------------------------------------------------------------------------------------------------------|--------------------------------------------------------------------------------------|---------------------------------------------------------------------------------------------------------------------------|----------|
| Reference                                            | Year | Country                  | Type * | 1. Definition of SPHS                                      | 2. Measuring SPHS                                                                                                                        | 3. Challenges to SPHS                                                                                                                                                                        | 4. Improvements to SPHS                                                              | 5. Sustaining or scaling change for SPHS                                                                                  | 6. Other |
|                                                      |      |                          |        |                                                            |                                                                                                                                          | improve the sustainability of participating health systems in the treatment and management of chronic diseases                                                                               |                                                                                      |                                                                                                                           |          |
| Dhalla I. 2007                                       | 2007 | Canada                   | ED     |                                                            | The article speculates that it may be better to assess healthcare as a proportion of GDP rather than a proportion of Government spending | Politicians are recognising that the 'status quo' may not be sustainable due to system demands. This often assumes tax is static or declining, but this is open to debate and interpretation |                                                                                      | Increasing spending on healthcare can occur as long as it does not impinge upon spending on non-health goods and services |          |
| Dunn, P. M., B. B. Arnetz, J. F. Christensen, and L. | 2007 | United States of America | EM     |                                                            |                                                                                                                                          |                                                                                                                                                                                              | Through a program in which leadership and physicians themselves recognised physician |                                                                                                                           |          |

1  
2  
3  
4  
5  
6  
7  
8  
9  
10  
11  
12  
13  
14  
15  
16  
17  
18  
19  
20  
21  
22  
23  
24  
25  
26  
27  
28  
29  
30  
31  
32  
33  
34  
35  
36  
37  
38  
39  
40  
41  
42  
43  
44  
45  
46  
47

| <i>Article demographics</i>                            |             |                |               | <i>Reason for article inclusion and summary of results</i> |                          |                                                                                                                                                |                                                                                                   |                                                                                                    |                 |
|--------------------------------------------------------|-------------|----------------|---------------|------------------------------------------------------------|--------------------------|------------------------------------------------------------------------------------------------------------------------------------------------|---------------------------------------------------------------------------------------------------|----------------------------------------------------------------------------------------------------|-----------------|
| <b>Reference</b>                                       | <b>Year</b> | <b>Country</b> | <b>Type *</b> | <b>1. Definition of SPHS</b>                               | <b>2. Measuring SPHS</b> | <b>3. Challenges to SPHS</b>                                                                                                                   | <b>4. Improvements to SPHS</b>                                                                    | <b>5. Sustaining or scaling change for SPHS</b>                                                    | <b>6. Other</b> |
| Homer. 2007                                            |             |                |               |                                                            |                          |                                                                                                                                                | wellbeing as important, and this well-being was measured                                          |                                                                                                    |                 |
| Edwards, N., M. Rowan, P. Marck, and D. Grinspun. 2011 | 2011        | Canada         | RA            |                                                            |                          | "Blockages" in the system e.g., power relationships, or unintentional blockages to innovation                                                  | Through the use of "leverage point" strategies such as structures by which to organise the system | Identified leverage points and blockages in macro- and micro-levels based on the literature review |                 |
| Ehrlich C, Kendall E. 2015                             | 2015        | Australia      | EM            |                                                            |                          | Participants identified that, should funding cease, the program would not be sustained. This was attributed to limitations in program planning |                                                                                                   |                                                                                                    |                 |
| Ellner, A. L., S. Stout, E. E. Sullivan, E. P.         | 2015        | Worldwide      | ED            |                                                            |                          | Recognises a lack of traditional metrics to measure health system                                                                              |                                                                                                   |                                                                                                    |                 |

| <i>Article demographics</i>                      |      |         |        | <i>Reason for article inclusion and summary of results</i> |                   |                                                                                                                                                                                                                                                                       |                                                                                                                                                                                                                                                                                                    |                                          |          |
|--------------------------------------------------|------|---------|--------|------------------------------------------------------------|-------------------|-----------------------------------------------------------------------------------------------------------------------------------------------------------------------------------------------------------------------------------------------------------------------|----------------------------------------------------------------------------------------------------------------------------------------------------------------------------------------------------------------------------------------------------------------------------------------------------|------------------------------------------|----------|
| Reference                                        | Year | Country | Type * | 1. Definition of SPHS                                      | 2. Measuring SPHS | 3. Challenges to SPHS                                                                                                                                                                                                                                                 | 4. Improvements to SPHS                                                                                                                                                                                                                                                                            | 5. Sustaining or scaling change for SPHS | 6. Other |
| Griffiths, A. Mountjoy, and R. S. Phillips. 2015 |      |         |        |                                                            |                   | improvement or sustainability                                                                                                                                                                                                                                         |                                                                                                                                                                                                                                                                                                    |                                          |          |
| Farmanova E, Kirvan C, Verma J, et al. 2016      | 2016 | Canada  | EM     |                                                            |                   | Lack of leadership support, difficulty creating partnerships, communicating with and engaging with staff and physicians, struggling with funding models that perpetuate working in silos, insufficient time and resources, difficulty obtaining data, data management | Start small, but think big; work toward incremental development; select a portfolio of projects that are manageable and align with Triple aim dimensions; include partners at the outset; strategize and build multidisciplinary teams and leverage existing capabilities; do not make assumptions |                                          |          |

1  
2  
3  
4  
5  
6  
7  
8  
9  
10  
11  
12  
13  
14  
15  
16  
17  
18  
19  
20  
21  
22  
23  
24  
25  
26  
27  
28  
29  
30  
31  
32  
33  
34  
35  
36  
37  
38  
39  
40  
41  
42  
43  
44  
45  
46  
47

| <i>Article demographics</i> |             |                          |               | <i>Reason for article inclusion and summary of results</i>                                                             |                          |                                                                        |                                                                                                                                                                                                                                                                                                           |                                                 |                 |
|-----------------------------|-------------|--------------------------|---------------|------------------------------------------------------------------------------------------------------------------------|--------------------------|------------------------------------------------------------------------|-----------------------------------------------------------------------------------------------------------------------------------------------------------------------------------------------------------------------------------------------------------------------------------------------------------|-------------------------------------------------|-----------------|
| <b>Reference</b>            | <b>Year</b> | <b>Country</b>           | <b>Type *</b> | <b>1. Definition of SPHS</b>                                                                                           | <b>2. Measuring SPHS</b> | <b>3. Challenges to SPHS</b>                                           | <b>4. Improvements to SPHS</b>                                                                                                                                                                                                                                                                            | <b>5. Sustaining or scaling change for SPHS</b> | <b>6. Other</b> |
|                             |             |                          |               |                                                                                                                        |                          | and measurement, scoping improvement projects, ensuring sustainability | about patients/clients                                                                                                                                                                                                                                                                                    |                                                 |                 |
| Fineberg HV. 2012           | 2012        | United States of America | ED            | Affordability (for individuals, organisations and the government), acceptability to key constituents, and adaptability |                          |                                                                        | Increased use of IT, re-doubling the efforts to enhance quality and safety in medical care, improving healthcare of high-need patients in a way that prevents hospitalisations, honour patient preferences, rely on systems engineering and operations research to smooth the patient journey through the |                                                 |                 |



| <i>Article demographics</i>                                             |      |                          |        | <i>Reason for article inclusion and summary of results</i> |                                                                                  |                                                                     |                                                                                                     |                                          |          |
|-------------------------------------------------------------------------|------|--------------------------|--------|------------------------------------------------------------|----------------------------------------------------------------------------------|---------------------------------------------------------------------|-----------------------------------------------------------------------------------------------------|------------------------------------------|----------|
| Reference                                                               | Year | Country                  | Type * | 1. Definition of SPHS                                      | 2. Measuring SPHS                                                                | 3. Challenges to SPHS                                               | 4. Improvements to SPHS                                                                             | 5. Sustaining or scaling change for SPHS | 6. Other |
|                                                                         |      |                          |        |                                                            |                                                                                  |                                                                     | health system, learn from peers and from evidence, and champion a system that values accountability |                                          |          |
| Foo, C. Y., K. K. Lim, S. Sivasambu, K. B. Dahian, and P. P. Goh. 2015. | 2015 | Malaysia                 | EM     |                                                            | Measurement using data envelopment analysis (DEA) overtime to measure efficiency |                                                                     |                                                                                                     |                                          |          |
| Fox, L. A., K. E. Walsh, and E. G. Schainker. 2016                      | 2016 | United States of America | EM     |                                                            | Measured group sustainability through staff turnover rate                        |                                                                     |                                                                                                     |                                          |          |
| Garde S, Hullin CM, Chen R, et al. 2007                                 | 2007 | Worldwide                | RA     | Argues that linking the health system sustainability       | There is a lack of qualitative indicators for sustainability. Suggestions of     | There are technological (e.g., making programs that can be flexible |                                                                                                     |                                          |          |

1  
2  
3  
4  
5  
6  
7  
8  
9  
10  
11  
12  
13  
14  
15  
16  
17  
18  
19  
20  
21  
22  
23  
24  
25  
26  
27  
28  
29  
30  
31  
32  
33  
34  
35  
36  
37  
38  
39  
40  
41  
42  
43  
44  
45  
46  
47

| <i>Article demographics</i>                                                |             |                |               | <i>Reason for article inclusion and summary of results</i>                                                                                                         |                                                                                                                            |                                                                                                                                |                                                     |                                                 |                 |
|----------------------------------------------------------------------------|-------------|----------------|---------------|--------------------------------------------------------------------------------------------------------------------------------------------------------------------|----------------------------------------------------------------------------------------------------------------------------|--------------------------------------------------------------------------------------------------------------------------------|-----------------------------------------------------|-------------------------------------------------|-----------------|
| <b>Reference</b>                                                           | <b>Year</b> | <b>Country</b> | <b>Type *</b> | <b>1. Definition of SPHS</b>                                                                                                                                       | <b>2. Measuring SPHS</b>                                                                                                   | <b>3. Challenges to SPHS</b>                                                                                                   | <b>4. Improvements to SPHS</b>                      | <b>5. Sustaining or scaling change for SPHS</b> | <b>6. Other</b> |
|                                                                            |             |                |               | and health information systems is important, but recognises that there is no suitable and all-encompassing definition of sustainability in relation to healthcare. | measuring sustainability by the eMergy (embodied energy) sustainability index                                              | and adapt to context changes), socio-political and organizational (e.g., needing drivers behind interventions) issues/barriers |                                                     |                                                 |                 |
| Global, regional, and national disability-adjusted life-years (DALYs) 2017 | 2017        | Worldwide      | EM            |                                                                                                                                                                    | Used information previously gathered to make decisions regarding healthy life expectancy and risk-adjusted life expectancy |                                                                                                                                | Formulation of sustainable development goals (SDGs) |                                                 |                 |

| <i>Article demographics</i>                                                       |             |                |               | <i>Reason for article inclusion and summary of results</i>                             |                                                                                                                            |                              |                                                                                                                                       |                                                                                                                                                                                                                         |                 |
|-----------------------------------------------------------------------------------|-------------|----------------|---------------|----------------------------------------------------------------------------------------|----------------------------------------------------------------------------------------------------------------------------|------------------------------|---------------------------------------------------------------------------------------------------------------------------------------|-------------------------------------------------------------------------------------------------------------------------------------------------------------------------------------------------------------------------|-----------------|
| <b>Reference</b>                                                                  | <b>Year</b> | <b>Country</b> | <b>Type *</b> | <b>1. Definition of SPHS</b>                                                           | <b>2. Measuring SPHS</b>                                                                                                   | <b>3. Challenges to SPHS</b> | <b>4. Improvements to SPHS</b>                                                                                                        | <b>5. Sustaining or scaling change for SPHS</b>                                                                                                                                                                         | <b>6. Other</b> |
| Greenhalgh, T., F. Macfarlane, C. Barton-Sweeney, and F. Woodard. 2012            | 2012        | United Kingdom | ED            |                                                                                        | Case study: three-year follow-up of a healthcare program in London that underwent changes in terms of policy and economics |                              | Some services changed over the three years and were altered relating to changes that happened with time e.g., national policy changes | Some interventions were sustained but looked different to the original intervention, due to it being adapted through the three years                                                                                    |                 |
| Gruen RL, Elliott JH, Nolan ML, Lawton PD, Parkhill A, McLaren CJ, Lavis JN. 2008 | 2008        | Worldwide      | RA            | Sustainability after an initial implementation period when funding ceases is difficult |                                                                                                                            |                              |                                                                                                                                       | Targets of interventions to improve sustainability included the individual (e.g., through education), organisation (e.g., changes to policy), community (e.g., social actions) and system levels (e.g. social advocacy) |                 |

1  
2  
3  
4  
5  
6  
7  
8  
9  
10  
11  
12  
13  
14  
15  
16  
17  
18  
19  
20  
21  
22  
23  
24  
25  
26  
27  
28  
29  
30  
31  
32  
33  
34  
35  
36  
37  
38  
39  
40  
41  
42  
43  
44  
45  
46  
47

| <i>Article demographics</i>                   |             |                |               | <i>Reason for article inclusion and summary of results</i> |                          |                                                                                                                                      |                                                                                                                                                                                    |                                                 |                 |
|-----------------------------------------------|-------------|----------------|---------------|------------------------------------------------------------|--------------------------|--------------------------------------------------------------------------------------------------------------------------------------|------------------------------------------------------------------------------------------------------------------------------------------------------------------------------------|-------------------------------------------------|-----------------|
| <b>Reference</b>                              | <b>Year</b> | <b>Country</b> | <b>Type *</b> | <b>1. Definition of SPHS</b>                               | <b>2. Measuring SPHS</b> | <b>3. Challenges to SPHS</b>                                                                                                         | <b>4. Improvements to SPHS</b>                                                                                                                                                     | <b>5. Sustaining or scaling change for SPHS</b> | <b>6. Other</b> |
| Guyon A, Hancock T, Kirk M, et al. 2017       | 2017        | Canada         | ED            |                                                            |                          |                                                                                                                                      | Recognising the importance of governments and the health system providing fund and support for public health, as it delivers important information for the health system to thrive |                                                 |                 |
| Heron, N. 2015                                | 2015        | North Ireland  | EM            |                                                            |                          |                                                                                                                                      | Measure the effect of an intervention for management of musculoskeletal complaints in GP                                                                                           |                                                 |                 |
| Hibbert PD, Thomas MJW, Deakin A, et al. 2018 | 2018        | Australia      | EM            |                                                            |                          | When there is an adverse event (AE) resulting in a root cause analysis (RCA), there are barely ever (5% of the time) provided strong | Observations and patient and carer interviews and review of notes may be useful in gaining a better understanding of adverse event situations                                      |                                                 |                 |

| <i>Article demographics</i>                  |      |                                    |        | <i>Reason for article inclusion and summary of results</i>                                       |                                                           |                                                                                                                 |                                                                                                                  |                                                                                                                                                                     |          |
|----------------------------------------------|------|------------------------------------|--------|--------------------------------------------------------------------------------------------------|-----------------------------------------------------------|-----------------------------------------------------------------------------------------------------------------|------------------------------------------------------------------------------------------------------------------|---------------------------------------------------------------------------------------------------------------------------------------------------------------------|----------|
| Reference                                    | Year | Country                            | Type * | 1. Definition of SPHS                                                                            | 2. Measuring SPHS                                         | 3. Challenges to SPHS                                                                                           | 4. Improvements to SPHS                                                                                          | 5. Sustaining or scaling change for SPHS                                                                                                                            | 6. Other |
|                                              |      |                                    |        |                                                                                                  |                                                           | recommendations for altering and improving the health system. 86% of the recommendations were considered 'weak' |                                                                                                                  |                                                                                                                                                                     |          |
| Hovenga EJ. 2013                             | 2013 | Worldwide                          | ED     | Where everyone can access safe and correct health services to achieve the best outcomes possible |                                                           |                                                                                                                 | Four main outcomes or goals: improved health, responsiveness, financial risk protection, and improved efficiency | Information technology (IT) has a role to play in creating sustainable health systems (as it can lead to decisions having better clinical outcomes and lower costs) |          |
| Inotai A, Petrova G, Vitezic D, Kalo Z. 2014 | 2014 | Central-Eastern European Countries | ED     | Focus on financial sustainability                                                                | Measure the potential innovation by new drugs in terms of |                                                                                                                 | Goal of innovative pharmaceutical companies is to provide health gain, equity in                                 |                                                                                                                                                                     |          |

1  
2  
3  
4  
5  
6  
7  
8  
9  
10  
11  
12  
13  
14  
15  
16  
17  
18  
19  
20  
21  
22  
23  
24  
25  
26  
27  
28  
29  
30  
31  
32  
33  
34  
35  
36  
37  
38  
39  
40  
41  
42  
43  
44  
45  
46  
47

| <i>Article demographics</i> |             |                          |               | <i>Reason for article inclusion and summary of results</i> |                                                              |                                                                       |                                                                                                                                                                                         |                                                 |                 |
|-----------------------------|-------------|--------------------------|---------------|------------------------------------------------------------|--------------------------------------------------------------|-----------------------------------------------------------------------|-----------------------------------------------------------------------------------------------------------------------------------------------------------------------------------------|-------------------------------------------------|-----------------|
| <b>Reference</b>            | <b>Year</b> | <b>Country</b>           | <b>Type *</b> | <b>1. Definition of SPHS</b>                               | <b>2. Measuring SPHS</b>                                     | <b>3. Challenges to SPHS</b>                                          | <b>4. Improvements to SPHS</b>                                                                                                                                                          | <b>5. Sustaining or scaling change for SPHS</b> | <b>6. Other</b> |
|                             |             |                          |               |                                                            | monetary value                                               |                                                                       | health, responsiveness of patients with complex comorbidities. To create this financial sustainability, affordable new innovative treatments and political sustainability are necessary |                                                 |                 |
| Kepros JP, Opreanu RC. 2009 | 2009        | United States of America | ED            |                                                            | Measuring the financial and social output of an organisation |                                                                       | Requires optimal relationships and synergy between the hospital, medical school and physicians, each with their own core competencies                                                   |                                                 |                 |
| Kerr R, Hendrie DV. 2018    | 2018        | Australia                | EM            | Two meanings: 1) financial sustainability for              |                                                              | To effectively fund patient access to hospital care in a system where |                                                                                                                                                                                         |                                                 |                 |

| <i>Article demographics</i> |      |                          |        | <i>Reason for article inclusion and summary of results</i>       |                                                                  |                                                                                                                                                    |                                                                                                                                                                                                                                                                                                |                                          |          |
|-----------------------------|------|--------------------------|--------|------------------------------------------------------------------|------------------------------------------------------------------|----------------------------------------------------------------------------------------------------------------------------------------------------|------------------------------------------------------------------------------------------------------------------------------------------------------------------------------------------------------------------------------------------------------------------------------------------------|------------------------------------------|----------|
| Reference                   | Year | Country                  | Type * | 1. Definition of SPHS                                            | 2. Measuring SPHS                                                | 3. Challenges to SPHS                                                                                                                              | 4. Improvements to SPHS                                                                                                                                                                                                                                                                        | 5. Sustaining or scaling change for SPHS | 6. Other |
|                             |      |                          |        | governments and health services; 2) environmental sustainability |                                                                  | capital allocation is not funded based on patient-centredness                                                                                      |                                                                                                                                                                                                                                                                                                |                                          |          |
| Knutson, D. J. 1997         | 1997 | United States of America | ED     |                                                                  | The issue of measurement after the funding period was terminated | Limitations in current models of chronic illness management, and the difference between thinking about and the reality of how clinical work occurs | Recognises important components of models for critical care: should be patient centred, have a critical illness management model, be conscious of minimising patient out-of-pocket expenses, consulting with the organisation, and recognising the link between clinical and research outcomes |                                          |          |

1  
2  
3  
4  
5  
6  
7  
8  
9  
10  
11  
12  
13  
14  
15  
16  
17  
18  
19  
20  
21  
22  
23  
24  
25  
26  
27  
28  
29  
30  
31  
32  
33  
34  
35  
36  
37  
38  
39  
40  
41  
42  
43  
44  
45  
46  
47

| <i>Article demographics</i>                 |             |                |               | <i>Reason for article inclusion and summary of results</i> |                                                                                                                                          |                                                     |                                                                                                                                                                                                                                                                                                                                               |                                                                                                                                    |                 |
|---------------------------------------------|-------------|----------------|---------------|------------------------------------------------------------|------------------------------------------------------------------------------------------------------------------------------------------|-----------------------------------------------------|-----------------------------------------------------------------------------------------------------------------------------------------------------------------------------------------------------------------------------------------------------------------------------------------------------------------------------------------------|------------------------------------------------------------------------------------------------------------------------------------|-----------------|
| <b>Reference</b>                            | <b>Year</b> | <b>Country</b> | <b>Type *</b> | <b>1. Definition of SPHS</b>                               | <b>2. Measuring SPHS</b>                                                                                                                 | <b>3. Challenges to SPHS</b>                        | <b>4. Improvements to SPHS</b>                                                                                                                                                                                                                                                                                                                | <b>5. Sustaining or scaling change for SPHS</b>                                                                                    | <b>6. Other</b> |
| Lega, F., Prenestini, A., Spurgeon, P. 2013 | 2013        | Worldwide      | RA            |                                                            | Thirty-seven studies in a systematic review (both qualitative and quantitative were involved, and some had causal relationship analysis) | Rising costs, economic crises and ageing population | Recognise that the performance of healthcare organisations is correlated to management practices, leadership, engagement with professionals, management characteristics (e.g., training [doctors as managers are beneficial], background, career history), and organisational culture and management status. New technologies are also useful | Medical engagement is linked to better patient mortality rates, decreased serious incidents, maintains high levels of patient care |                 |
| Lehoux P, Williams-Jones B,                 | 2008        | Worldwide      | ED            | Recognising the importance                                 |                                                                                                                                          |                                                     |                                                                                                                                                                                                                                                                                                                                               |                                                                                                                                    |                 |



| <i>Article demographics</i>           |      |                          |        | <i>Reason for article inclusion and summary of results</i>              |                                                                                                                                                                              |                       |                                                                                                                                                                                                                          |                                          |          |
|---------------------------------------|------|--------------------------|--------|-------------------------------------------------------------------------|------------------------------------------------------------------------------------------------------------------------------------------------------------------------------|-----------------------|--------------------------------------------------------------------------------------------------------------------------------------------------------------------------------------------------------------------------|------------------------------------------|----------|
| Reference                             | Year | Country                  | Type * | 1. Definition of SPHS                                                   | 2. Measuring SPHS                                                                                                                                                            | 3. Challenges to SPHS | 4. Improvements to SPHS                                                                                                                                                                                                  | 5. Sustaining or scaling change for SPHS | 6. Other |
| Miller F, Urbach D, Tailliez S. 2008  |      |                          |        | of being sustainable overtime, rather than creating for short-term gain |                                                                                                                                                                              |                       |                                                                                                                                                                                                                          |                                          |          |
| L, Goeree R, Levine M, et al. 2011    | 2011 | Canada                   | RA     |                                                                         | When post-drug interventions are being used clinically, there should be field evaluation studies conducted to ensure the efficacy and cost effectiveness of the intervention |                       | Coverage with evidence development (CED) is necessary, not to replace RCTs, but to gain the next level of knowledge about that intervention in clinical practice. It will also increase inter-disciplinary collaboration |                                          |          |
| Levine, S., S. O'Mahony, A. Baron, A. | 2017 | United States of America | EM     |                                                                         |                                                                                                                                                                              |                       | Interventions to improve palliative care (PC) in paediatric hospitals, and to                                                                                                                                            |                                          |          |

1  
2  
3  
4  
5  
6  
7  
8  
9  
10  
11  
12  
13  
14  
15  
16  
17  
18  
19  
20  
21  
22  
23  
24  
25  
26  
27  
28  
29  
30  
31  
32  
33  
34  
35  
36  
37  
38  
39  
40  
41  
42  
43  
44  
45  
46  
47

| <i>Article demographics</i>                                                |             |                |               | <i>Reason for article inclusion and summary of results</i> |                          |                                                                                                     |                                                                                                                                                                                                                                                                |                                                                                                                                                                                                                                  |                 |
|----------------------------------------------------------------------------|-------------|----------------|---------------|------------------------------------------------------------|--------------------------|-----------------------------------------------------------------------------------------------------|----------------------------------------------------------------------------------------------------------------------------------------------------------------------------------------------------------------------------------------------------------------|----------------------------------------------------------------------------------------------------------------------------------------------------------------------------------------------------------------------------------|-----------------|
| <b>Reference</b>                                                           | <b>Year</b> | <b>Country</b> | <b>Type *</b> | <b>1. Definition of SPHS</b>                               | <b>2. Measuring SPHS</b> | <b>3. Challenges to SPHS</b>                                                                        | <b>4. Improvements to SPHS</b>                                                                                                                                                                                                                                 | <b>5. Sustaining or scaling change for SPHS</b>                                                                                                                                                                                  | <b>6. Other</b> |
| Ansari, C. Deamant, J. Frader, I. Leyva, M. Marschke, and M. Preodor. 2017 |             |                |               |                                                            |                          |                                                                                                     | improve physician self-care                                                                                                                                                                                                                                    |                                                                                                                                                                                                                                  |                 |
| Lewis S. 2007                                                              | 2007        | Canada         | ED            |                                                            |                          | Financial, ageing population, concern over the proportion of government spending used on healthcare | The challenge of learning from other countries, and recognising the context specific elements of the systems they have enforced, and appropriately contextualising to the Canadian context e.g., Europe pays doctors less than Canada, utilises more home care | Believes sustainability should not be the focus, but rather quality improvement, aligning incentives with goals, making excellence mandatory and reducing health disparities should be the goal for at least the next five years |                 |
| Liaropoul os L,                                                            | 2015        | Worldwi de     | ED            |                                                            |                          | Ageing population, the                                                                              |                                                                                                                                                                                                                                                                |                                                                                                                                                                                                                                  | It was suggest  |

| <i>Article demographics</i>                                                                |      |           |        | <i>Reason for article inclusion and summary of results</i> |                                                                                  |                                                                                                                                                                |                                                                                                                                                                                                         |                                          |                                                                |
|--------------------------------------------------------------------------------------------|------|-----------|--------|------------------------------------------------------------|----------------------------------------------------------------------------------|----------------------------------------------------------------------------------------------------------------------------------------------------------------|---------------------------------------------------------------------------------------------------------------------------------------------------------------------------------------------------------|------------------------------------------|----------------------------------------------------------------|
| Reference                                                                                  | Year | Country   | Type * | 1. Definition of SPHS                                      | 2. Measuring SPHS                                                                | 3. Challenges to SPHS                                                                                                                                          | 4. Improvements to SPHS                                                                                                                                                                                 | 5. Sustaining or scaling change for SPHS | 6. Other                                                       |
| Goranitis I. 2015                                                                          |      |           |        |                                                            |                                                                                  | financial stress placed on healthcare systems, and the question of who is to pay for this increased cost? (e.g., does retirement age remain the same or rise?) |                                                                                                                                                                                                         |                                          | ed that taxation should be a focus to contribute to healthcare |
| Lizarondo, L., C. Turnbull, T. Kroon, K. Grimmer, A. Bell, S. Kumar, M. McEvoy et al. 2016 | 2016 | Australia | EM     |                                                            | Using survey of Scott's 10 strategies for sustaining change in the health system |                                                                                                                                                                | Allied health respondents recognised that low- or no-impact interventions that cause little improvement or cause harm could be minimised, and by selecting care responses for comparative effectiveness |                                          |                                                                |
| Lozano I, Rondan J, Vegas JM,                                                              | 2016 | Spain     | ED     |                                                            |                                                                                  | Funding and support for ongoing professional                                                                                                                   |                                                                                                                                                                                                         |                                          |                                                                |

1  
2  
3  
4  
5  
6  
7  
8  
9  
10  
11  
12  
13  
14  
15  
16  
17  
18  
19  
20  
21  
22  
23  
24  
25  
26  
27  
28  
29  
30  
31  
32  
33  
34  
35  
36  
37  
38  
39  
40  
41  
42  
43  
44  
45  
46  
47

| <i>Article demographics</i>               |             |                          |               | <i>Reason for article inclusion and summary of results</i>                                     |                          |                                                                                                                                                  |                                                                                                                                                                                 |                                                 |                 |
|-------------------------------------------|-------------|--------------------------|---------------|------------------------------------------------------------------------------------------------|--------------------------|--------------------------------------------------------------------------------------------------------------------------------------------------|---------------------------------------------------------------------------------------------------------------------------------------------------------------------------------|-------------------------------------------------|-----------------|
| <b>Reference</b>                          | <b>Year</b> | <b>Country</b>           | <b>Type *</b> | <b>1. Definition of SPHS</b>                                                                   | <b>2. Measuring SPHS</b> | <b>3. Challenges to SPHS</b>                                                                                                                     | <b>4. Improvements to SPHS</b>                                                                                                                                                  | <b>5. Sustaining or scaling change for SPHS</b> | <b>6. Other</b> |
| Segovia E. 2016                           |             |                          |               |                                                                                                |                          | learning, recognising differences in health structures between countries to understand how recommendations are transferrable                     |                                                                                                                                                                                 |                                                 |                 |
| Mackenzie J. 2011                         | 2011        | United Kingdom           | ED            | Sustainable development meets the needs of the present whilst ensuring future needs can be met |                          | The challenge of getting the balance between environmental, social and economic sustainability right, and considering how these factors interact | Need to take a systems view of managing system risk, ensuring a more sustainable business system, and being strategic in the long term rather than focusing on short term gains |                                                 |                 |
| Magnan S, Fisher E, Kindig D, et al. 2012 | 2012        | United States of America | ED            |                                                                                                |                          | There are very few or no direct links between investing healthcare and establishing the social                                                   | The development of "health outcomes trust" organisations and accountable care organisations (ACOs) to work                                                                      |                                                 |                 |

| <i>Article demographics</i>   |      |                |        | <i>Reason for article inclusion and summary of results</i> |                     |                                                                                                                                                                                           |                                                                                                                                                                                |                                          |          |
|-------------------------------|------|----------------|--------|------------------------------------------------------------|---------------------|-------------------------------------------------------------------------------------------------------------------------------------------------------------------------------------------|--------------------------------------------------------------------------------------------------------------------------------------------------------------------------------|------------------------------------------|----------|
| Reference                     | Year | Country        | Type * | 1. Definition of SPHS                                      | 2. Measuring SPHS   | 3. Challenges to SPHS                                                                                                                                                                     | 4. Improvements to SPHS                                                                                                                                                        | 5. Sustaining or scaling change for SPHS | 6. Other |
|                               |      |                |        |                                                            |                     | determinants of health, and there is little communication between stakeholders in these different camps. Rising healthcare costs are also a concern                                       | to fulfil the triple aim and have sustainable funding. Community goal setting could also help to pay for population health                                                     |                                          |          |
| McGorry PD, Hamilton MP. 2016 | 2016 | Australia      | ED     |                                                            |                     | The challenges of implementing effective mental health reforms, including allowing access to early intervention with government funding, and funding with the NDIS for more complex cases | E-health giving the opportunity for a complementary role at all stages of illness, and the importance of research and evaluation in creating the most cost-effective solutions |                                          |          |
| McGrath, S. P., and           | 2015 | United Kingdom | EM     |                                                            | Dartmouth-Hitchcock |                                                                                                                                                                                           | The define-measure-analyse-                                                                                                                                                    | The last phase, 'control'                |          |

1  
2  
3  
4  
5  
6  
7  
8  
9  
10  
11  
12  
13  
14  
15  
16  
17  
18  
19  
20  
21  
22  
23  
24  
25  
26  
27  
28  
29  
30  
31  
32  
33  
34  
35  
36  
37  
38  
39  
40  
41  
42  
43  
44  
45  
46  
47

| <i>Article demographics</i>                                              |             |                          |               | <i>Reason for article inclusion and summary of results</i> |                            |                                                                                                                               |                                                                                             |                                                                                                                                                             |                 |
|--------------------------------------------------------------------------|-------------|--------------------------|---------------|------------------------------------------------------------|----------------------------|-------------------------------------------------------------------------------------------------------------------------------|---------------------------------------------------------------------------------------------|-------------------------------------------------------------------------------------------------------------------------------------------------------------|-----------------|
| <b>Reference</b>                                                         | <b>Year</b> | <b>Country</b>           | <b>Type *</b> | <b>1. Definition of SPHS</b>                               | <b>2. Measuring SPHS</b>   | <b>3. Challenges to SPHS</b>                                                                                                  | <b>4. Improvements to SPHS</b>                                                              | <b>5. Sustaining or scaling change for SPHS</b>                                                                                                             | <b>6. Other</b> |
| G. T. Blike. 2015                                                        |             |                          |               |                                                            | Value Institute Experience |                                                                                                                               | improve-control framework was developed to allow a problem-solving approach to challenges   | promotes the changes to be sustained through time                                                                                                           |                 |
| McIntosh E, Nagelkerk J, Vonderheid SC, Poole M, Dontje K, Pohl JM. 2003 | 2003        | United States of America | ED            |                                                            |                            | Recognition that nurse-managed centres often do not receive the necessary financial support for their centres to be continued | A financial advisory committee (FAC) could help improve financial outcomes in these centres | The FAC had meetings over three years and developed financial skills of the individuals                                                                     |                 |
| McVeigh J, MacLachlan M, Gilmore B, et al. 2016                          | 2016        | Worldwide                | RA, EM        |                                                            |                            |                                                                                                                               |                                                                                             | Participation of people with disabilities (service users) in policy development and the governance of that service to improve sustainability. Additionally, |                 |

| <i>Article demographics</i>                                                 |      |                          |        | <i>Reason for article inclusion and summary of results</i> |                                                                                                            |                                                                                                                                   |                         |                                                                                                                                                                                                                                                   |          |
|-----------------------------------------------------------------------------|------|--------------------------|--------|------------------------------------------------------------|------------------------------------------------------------------------------------------------------------|-----------------------------------------------------------------------------------------------------------------------------------|-------------------------|---------------------------------------------------------------------------------------------------------------------------------------------------------------------------------------------------------------------------------------------------|----------|
| Reference                                                                   | Year | Country                  | Type * | 1. Definition of SPHS                                      | 2. Measuring SPHS                                                                                          | 3. Challenges to SPHS                                                                                                             | 4. Improvements to SPHS | 5. Sustaining or scaling change for SPHS                                                                                                                                                                                                          | 6. Other |
|                                                                             |      |                          |        |                                                            |                                                                                                            |                                                                                                                                   |                         | aligning or integrating new models of care with existing models can strengthen program delivery and implementation of policies for rehabilitation. Support from professionals in the field and stakeholders is also beneficial for sustainability |          |
| Molfenter, T., D. Gustafson, C. Kilo, A. Bhattacharya, and J. Olsson. 2005. | 2005 | United States of America | EM     |                                                            | Measure the self-reported and faculty-reported the success and sustenance of changes to their organisation | The model used was not able to predict sustainability of interventions or programs, but this may be due to the time period or the |                         |                                                                                                                                                                                                                                                   |          |

1  
2  
3  
4  
5  
6  
7  
8  
9  
10  
11  
12  
13  
14  
15  
16  
17  
18  
19  
20  
21  
22  
23  
24  
25  
26  
27  
28  
29  
30  
31  
32  
33  
34  
35  
36  
37  
38  
39  
40  
41  
42  
43  
44  
45  
46  
47

| <i>Article demographics</i> |             |                |               | <i>Reason for article inclusion and summary of results</i> |                          |                               |                                                                                                                                                                                                                                                                                                                                                                     |                                                 |                 |
|-----------------------------|-------------|----------------|---------------|------------------------------------------------------------|--------------------------|-------------------------------|---------------------------------------------------------------------------------------------------------------------------------------------------------------------------------------------------------------------------------------------------------------------------------------------------------------------------------------------------------------------|-------------------------------------------------|-----------------|
| <b>Reference</b>            | <b>Year</b> | <b>Country</b> | <b>Type *</b> | <b>1. Definition of SPHS</b>                               | <b>2. Measuring SPHS</b> | <b>3. Challenges to SPHS</b>  | <b>4. Improvements to SPHS</b>                                                                                                                                                                                                                                                                                                                                      | <b>5. Sustaining or scaling change for SPHS</b> | <b>6. Other</b> |
|                             |             |                |               |                                                            |                          | sustainability of the measure |                                                                                                                                                                                                                                                                                                                                                                     |                                                 |                 |
| Nagle LM, Pitts BM. 2012    | 2012        | Canada         | ED            |                                                            |                          |                               | Recommendations: raise public awareness of services available, improve access to primary healthcare, empower patients about their care, use incentives to encourage serving in under-served areas, create an integrated health record service, devise alternatives to the fee-for-service model, increase funding for community services, give health professionals |                                                 |                 |



| <i>Article demographics</i>                           |      |           |        | <i>Reason for article inclusion and summary of results</i> |                                                                                                                                                                        |                                                                                                                   |                                                                                                                                                                                  |                                          |          |
|-------------------------------------------------------|------|-----------|--------|------------------------------------------------------------|------------------------------------------------------------------------------------------------------------------------------------------------------------------------|-------------------------------------------------------------------------------------------------------------------|----------------------------------------------------------------------------------------------------------------------------------------------------------------------------------|------------------------------------------|----------|
| Reference                                             | Year | Country   | Type * | 1. Definition of SPHS                                      | 2. Measuring SPHS                                                                                                                                                      | 3. Challenges to SPHS                                                                                             | 4. Improvements to SPHS                                                                                                                                                          | 5. Sustaining or scaling change for SPHS | 6. Other |
|                                                       |      |           |        |                                                            |                                                                                                                                                                        |                                                                                                                   | communication and language training, emphasise healthy lifestyles, ensure pharmaceuticals are affordable, decrease wait time and increase access for services for mental illness |                                          |          |
| Pacifico Silva H, Lehoux P, Miller FA, Denis JL. 2018 | 2018 | Worldwide | ED     |                                                            | Development of the responsible innovations for health (RIH) framework which identifies interventions that respond to the context and support equitable and sustainable | Ensuring Responsible Innovations in Health (RIH), involving consideration of sustainability and equity challenges |                                                                                                                                                                                  |                                          |          |

1  
2  
3  
4  
5  
6  
7  
8  
9  
10  
11  
12  
13  
14  
15  
16  
17  
18  
19  
20  
21  
22  
23  
24  
25  
26  
27  
28  
29  
30  
31  
32  
33  
34  
35  
36  
37  
38  
39  
40  
41  
42  
43  
44  
45  
46  
47

| <i>Article demographics</i> |             |                |               | <i>Reason for article inclusion and summary of results</i> |                                                                                                                                     |                                                                                                                                                                                                    |                                                                                                                                                                                                     |                                                 |                 |
|-----------------------------|-------------|----------------|---------------|------------------------------------------------------------|-------------------------------------------------------------------------------------------------------------------------------------|----------------------------------------------------------------------------------------------------------------------------------------------------------------------------------------------------|-----------------------------------------------------------------------------------------------------------------------------------------------------------------------------------------------------|-------------------------------------------------|-----------------|
| <b>Reference</b>            | <b>Year</b> | <b>Country</b> | <b>Type *</b> | <b>1. Definition of SPHS</b>                               | <b>2. Measuring SPHS</b>                                                                                                            | <b>3. Challenges to SPHS</b>                                                                                                                                                                       | <b>4. Improvements to SPHS</b>                                                                                                                                                                      | <b>5. Sustaining or scaling change for SPHS</b> | <b>6. Other</b> |
|                             |             |                |               |                                                            | health service. It includes 5 domains: 1. population health; 2. health system; 3. Economic; 4. organisational; and 5. environmental |                                                                                                                                                                                                    |                                                                                                                                                                                                     |                                                 |                 |
| Pencheon D. 2013            | 2013        | England        | ED            |                                                            | Measuring preventable illness and unplanned hospital admissions as system failures until proven otherwise                           | Understanding the changing needs (demographic, social, cultural) of the changing population; understanding how the rapid growth of science and technology can change outcomes; the need for public | Utilising technology to promote sustainable and personalised healthcare, and improving the prevention of illness rather than treating the illness once it arises e.g., increasing physical activity |                                                 |                 |

| <i>Article demographics</i>                                      |      |                          |        | <i>Reason for article inclusion and summary of results</i> |                                                                                                                                                  |                                                                                  |                                                                                   |                                          |          |
|------------------------------------------------------------------|------|--------------------------|--------|------------------------------------------------------------|--------------------------------------------------------------------------------------------------------------------------------------------------|----------------------------------------------------------------------------------|-----------------------------------------------------------------------------------|------------------------------------------|----------|
| Reference                                                        | Year | Country                  | Type * | 1. Definition of SPHS                                      | 2. Measuring SPHS                                                                                                                                | 3. Challenges to SPHS                                                            | 4. Improvements to SPHS                                                           | 5. Sustaining or scaling change for SPHS | 6. Other |
|                                                                  |      |                          |        |                                                            |                                                                                                                                                  | services to act within environmental boundaries and increased levels of scrutiny |                                                                                   |                                          |          |
| Peric, N., M. M. Hofmarcher-Holzhaecker, and J. Simon. 2017.     | 2017 | European Union Countries | RA     |                                                            | Does not answer how we measure sustainability but the methods or 'actors and actions' by which sustainable health system performance is assessed |                                                                                  |                                                                                   |                                          |          |
| Pronovost, P. J., C. G. Holzmueller, T. Callender, R. Demski, L. | 2016 | United States of America | ED     |                                                            | Measuring performance of the Johns Hopkins Hospital (JHH) over a number of years compared to                                                     |                                                                                  | Phase 3 of the program involved a peer education program for health professionals |                                          |          |

1  
2  
3  
4  
5  
6  
7  
8  
9  
10  
11  
12  
13  
14  
15  
16  
17  
18  
19  
20  
21  
22  
23  
24  
25  
26  
27  
28  
29  
30  
31  
32  
33  
34  
35  
36  
37  
38  
39  
40  
41  
42  
43  
44  
45  
46  
47

| <i>Article demographics</i>                                            |             |                                                     |               | <i>Reason for article inclusion and summary of results</i>                                                                                                        |                                               |                                                         |                                |                                                 |                 |
|------------------------------------------------------------------------|-------------|-----------------------------------------------------|---------------|-------------------------------------------------------------------------------------------------------------------------------------------------------------------|-----------------------------------------------|---------------------------------------------------------|--------------------------------|-------------------------------------------------|-----------------|
| <b>Reference</b>                                                       | <b>Year</b> | <b>Country</b>                                      | <b>Type *</b> | <b>1. Definition of SPHS</b>                                                                                                                                      | <b>2. Measuring SPHS</b>                      | <b>3. Challenges to SPHS</b>                            | <b>4. Improvements to SPHS</b> | <b>5. Sustaining or scaling change for SPHS</b> | <b>6. Other</b> |
| Winner, R. Day, J. M. Austin, S. M. Berenholtz, and M. R. Miller. 2016 |             |                                                     |               |                                                                                                                                                                   | national guidelines                           |                                                         |                                |                                                 |                 |
| Rees, G. H. 2014.                                                      | 2014        | United States of America, United Kingdom, Australia | EM            | "Implementation to effect continuous improvement, by either setting a cycle or programming for the next unit on the patient journey to undertake Lean activities" |                                               |                                                         |                                |                                                 |                 |
| Robertson J, Walkom                                                    | 2011        | Australia                                           | EM            |                                                                                                                                                                   | Surveyed both GPs, specialists, and consumers | Both doctors and consumers recognise the rising cost of |                                |                                                 |                 |

| <i>Article demographics</i>    |      |                          |        | <i>Reason for article inclusion and summary of results</i> |                                                                                                  |                                                                                                                                                                                                                                                                           |                         |                                                                                                                                                                                                                                     |          |
|--------------------------------|------|--------------------------|--------|------------------------------------------------------------|--------------------------------------------------------------------------------------------------|---------------------------------------------------------------------------------------------------------------------------------------------------------------------------------------------------------------------------------------------------------------------------|-------------------------|-------------------------------------------------------------------------------------------------------------------------------------------------------------------------------------------------------------------------------------|----------|
| Reference                      | Year | Country                  | Type * | 1. Definition of SPHS                                      | 2. Measuring SPHS                                                                                | 3. Challenges to SPHS                                                                                                                                                                                                                                                     | 4. Improvements to SPHS | 5. Sustaining or scaling change for SPHS                                                                                                                                                                                            | 6. Other |
| EJ, Henry DA. 2011             |      |                          |        |                                                            | (patients) in the health system, and asked them to identify the potential problems in the system | healthcare, but doctors are less concerned than consumers regarding the sustainability of the health system                                                                                                                                                               |                         |                                                                                                                                                                                                                                     |          |
| Robertson TM, Lofgren RP. 2015 | 2015 | United States of America | ED     |                                                            |                                                                                                  | A large percentage (80%) of health spending is spent on a small proportion (20%) of the population due to complex episodes of care. The challenge is therefore to learn to address these in a more cost-effective manner, but this poses difficulties e.g., it is hard to |                         | "The national health care agenda has been heavily influenced by the assumptions that disease prevention and the general promotion of "population health" will be sufficient to reduce health care spending to a sustainable level." |          |

1  
2  
3  
4  
5  
6  
7  
8  
9  
10  
11  
12  
13  
14  
15  
16  
17  
18  
19  
20  
21  
22  
23  
24  
25  
26  
27  
28  
29  
30  
31  
32  
33  
34  
35  
36  
37  
38  
39  
40  
41  
42  
43  
44  
45  
46  
47

| <i>Article demographics</i>                              |             |                |               | <i>Reason for article inclusion and summary of results</i>                                                                                                                                                  |                          |                                                                                                                                                                                                                                                                                                 |                                                            |                                                 |                 |
|----------------------------------------------------------|-------------|----------------|---------------|-------------------------------------------------------------------------------------------------------------------------------------------------------------------------------------------------------------|--------------------------|-------------------------------------------------------------------------------------------------------------------------------------------------------------------------------------------------------------------------------------------------------------------------------------------------|------------------------------------------------------------|-------------------------------------------------|-----------------|
| <b>Reference</b>                                         | <b>Year</b> | <b>Country</b> | <b>Type *</b> | <b>1. Definition of SPHS</b>                                                                                                                                                                                | <b>2. Measuring SPHS</b> | <b>3. Challenges to SPHS</b>                                                                                                                                                                                                                                                                    | <b>4. Improvements to SPHS</b>                             | <b>5. Sustaining or scaling change for SPHS</b> | <b>6. Other</b> |
|                                                          |             |                |               |                                                                                                                                                                                                             |                          | decrease costs through conducting outpatient clinics                                                                                                                                                                                                                                            |                                                            |                                                 |                 |
| Rosenberg-Yunger ZR, Daar AS, Singer PA, Martin DK. 2008 | 2008        | Canada         | ED            | Sustainability of the health system “means ensuring that sufficient resources are available over the long term to provide timely access to quality services that address Canadians’ evolving health needs.” |                          | The rising cost of pharmaceuticals and biopharmaceuticals, the complicated process by which drugs get approved for funding and use in developed countries, and the time-consuming alternatives (e.g., the Special Access Program in Canada). This leads to moral questions about the legitimacy | A mechanism to involve more stakeholders in the discussion |                                                 |                 |

| <i>Article demographics</i> |      |                          |        | <i>Reason for article inclusion and summary of results</i> |                                             |                                                                                     |                                                                                                                                                |                                                                                                                                                                                                                                      |          |
|-----------------------------|------|--------------------------|--------|------------------------------------------------------------|---------------------------------------------|-------------------------------------------------------------------------------------|------------------------------------------------------------------------------------------------------------------------------------------------|--------------------------------------------------------------------------------------------------------------------------------------------------------------------------------------------------------------------------------------|----------|
| Reference                   | Year | Country                  | Type * | 1. Definition of SPHS                                      | 2. Measuring SPHS                           | 3. Challenges to SPHS                                                               | 4. Improvements to SPHS                                                                                                                        | 5. Sustaining or scaling change for SPHS                                                                                                                                                                                             | 6. Other |
|                             |      |                          |        |                                                            |                                             | and fairness of applying for drugs, especially new and expensive biopharmaceuticals |                                                                                                                                                |                                                                                                                                                                                                                                      |          |
| Rosser, M. 2006             | 2006 | Canada                   | ED     |                                                            |                                             |                                                                                     | The Healthcare Materials Management Services (HMMS) created in 1997 and its success hinged on the collaboration between the hospitals involved | Sustaining change is thought to be attributed to executive funding, leadership, collaboration, openness of providers to the process, support of front-line clinical leaders, and development of a unique entity with its own culture |          |
| Scheirer MA. 2005           | 2005 | United States of America | RA     | Sustaining a program or initiative that                    | Sustainability can fall into 3 measures: 1. | Challenge of funding only for short periods (3-                                     |                                                                                                                                                | The authors suggest that the expectation that                                                                                                                                                                                        |          |

1  
2  
3  
4  
5  
6  
7  
8  
9  
10  
11  
12  
13  
14  
15  
16  
17  
18  
19  
20  
21  
22  
23  
24  
25  
26  
27  
28  
29  
30  
31  
32  
33  
34  
35  
36  
37  
38  
39  
40  
41  
42  
43  
44  
45  
46  
47

| <i>Article demographics</i>             |             |                          |               | <i>Reason for article inclusion and summary of results</i>                                               |                                                                                                                                                                                                                                                                              |                                                                                                                                                                                                       |                                                         |                                                                                                                                                                     |                 |
|-----------------------------------------|-------------|--------------------------|---------------|----------------------------------------------------------------------------------------------------------|------------------------------------------------------------------------------------------------------------------------------------------------------------------------------------------------------------------------------------------------------------------------------|-------------------------------------------------------------------------------------------------------------------------------------------------------------------------------------------------------|---------------------------------------------------------|---------------------------------------------------------------------------------------------------------------------------------------------------------------------|-----------------|
| <b>Reference</b>                        | <b>Year</b> | <b>Country</b>           | <b>Type *</b> | <b>1. Definition of SPHS</b>                                                                             | <b>2. Measuring SPHS</b>                                                                                                                                                                                                                                                     | <b>3. Challenges to SPHS</b>                                                                                                                                                                          | <b>4. Improvements to SPHS</b>                          | <b>5. Sustaining or scaling change for SPHS</b>                                                                                                                     | <b>6. Other</b> |
|                                         |             |                          |               | had previously been developed and maintained after the initial funding period or other impetus had ended | health benefits continue post-funding (individual level outcomes); 2. continuation of program activities post-intervention (organisation level outcomes); 3. relates to changes in community capacity to promote health post-intervention/funding (community level outcomes) | 5 years) and the subsequent need to source funding. Also challenging is the uniqueness of context, whereby each project is influenced by its context and what programs or activities have preceded it |                                                         | a new project will be sustainable after a 3-year funding project may be overly optimistic (therefore that it is hard to find funding opportunities after that time) |                 |
| Schwann, N. M., K. A. Bretz, S. Eid, T. | 2011        | United States of America | EM            |                                                                                                          |                                                                                                                                                                                                                                                                              |                                                                                                                                                                                                       | Decrease hospital acquired infections through point-of- | Sustaining changes from an intervention                                                                                                                             |                 |



| <i>Article demographics</i>                               |             |                |               | <i>Reason for article inclusion and summary of results</i> |                          |                                                                                                                                                                                                                                                                                                             |                                                                                                                                                                                                          |                                                                                                                                                                                                               |                 |
|-----------------------------------------------------------|-------------|----------------|---------------|------------------------------------------------------------|--------------------------|-------------------------------------------------------------------------------------------------------------------------------------------------------------------------------------------------------------------------------------------------------------------------------------------------------------|----------------------------------------------------------------------------------------------------------------------------------------------------------------------------------------------------------|---------------------------------------------------------------------------------------------------------------------------------------------------------------------------------------------------------------|-----------------|
| <b>Reference</b>                                          | <b>Year</b> | <b>Country</b> | <b>Type *</b> | <b>1. Definition of SPHS</b>                               | <b>2. Measuring SPHS</b> | <b>3. Challenges to SPHS</b>                                                                                                                                                                                                                                                                                | <b>4. Improvements to SPHS</b>                                                                                                                                                                           | <b>5. Sustaining or scaling change for SPHS</b>                                                                                                                                                               | <b>6. Other</b> |
| Burger, D.<br>Fry, F.<br>Ackler, P.<br>Evans et al. 2011. |             |                |               |                                                            |                          |                                                                                                                                                                                                                                                                                                             | care electronic prompts (POCEPs)                                                                                                                                                                         | over a two-year period                                                                                                                                                                                        |                 |
| Scott IA. 2006                                            | 2006        | Australia      | ED            |                                                            |                          | Baby boomers getting older with comorbidities and decreased quality of life, the 'worried well', new technologies, the demand for new and further treatments, the influence of the media (e.g., "miracle cures"), juggling a finite health budget, threats of global warming, and deciding which treatments | Training patients with counselling and behavioural strategies to take more control over their own care, encouraging non-traditional caregivers to do some forms of care if found to be equally effective | Abolishing state and federal boundaries in funding and creating a new federal system, having each patient with a GP responsible for their care, linking healthcare databases with a unique patient identifier |                 |

1  
2  
3  
4  
5  
6  
7  
8  
9  
10  
11  
12  
13  
14  
15  
16  
17  
18  
19  
20  
21  
22  
23  
24  
25  
26  
27  
28  
29  
30  
31  
32  
33  
34  
35  
36  
37  
38  
39  
40  
41  
42  
43  
44  
45  
46  
47

| <i>Article demographics</i>  |             |                |               | <i>Reason for article inclusion and summary of results</i>                                                                                                                                                                    |                                                                                                                                                                                                                                                                                               |                                                                   |                                |                                                 |                 |
|------------------------------|-------------|----------------|---------------|-------------------------------------------------------------------------------------------------------------------------------------------------------------------------------------------------------------------------------|-----------------------------------------------------------------------------------------------------------------------------------------------------------------------------------------------------------------------------------------------------------------------------------------------|-------------------------------------------------------------------|--------------------------------|-------------------------------------------------|-----------------|
| <b>Reference</b>             | <b>Year</b> | <b>Country</b> | <b>Type *</b> | <b>1. Definition of SPHS</b>                                                                                                                                                                                                  | <b>2. Measuring SPHS</b>                                                                                                                                                                                                                                                                      | <b>3. Challenges to SPHS</b>                                      | <b>4. Improvements to SPHS</b> | <b>5. Sustaining or scaling change for SPHS</b> | <b>6. Other</b> |
|                              |             |                |               |                                                                                                                                                                                                                               |                                                                                                                                                                                                                                                                                               | should be subsidised                                              |                                |                                                 |                 |
| Sepehri A, Chernomas R. 2004 | 2004        | Canada         | ED            | Acknowledges that different fields have different definitions of sustainability, and that these definitions tend to focus on resources and the capacity of the public sector to finance current and future health expenditure | Fiscal sustainability has been measured through the percentage of provincial and territorial budget allocation for healthcare, but this acts on two assumptions. 1) providers are assumed to respond to needs, and 2) the needs are assumed to reflect the current state of medical knowledge | Threat to sustainability is the uncertainty of government funding |                                |                                                 |                 |

| <i>Article demographics</i>                             |      |           |        | <i>Reason for article inclusion and summary of results</i>                                                                                                                                                          |                                                                                                                                                                                                               |                                           |                                                                                                                                                                                                       |                                          |          |
|---------------------------------------------------------|------|-----------|--------|---------------------------------------------------------------------------------------------------------------------------------------------------------------------------------------------------------------------|---------------------------------------------------------------------------------------------------------------------------------------------------------------------------------------------------------------|-------------------------------------------|-------------------------------------------------------------------------------------------------------------------------------------------------------------------------------------------------------|------------------------------------------|----------|
| Reference                                               | Year | Country   | Type * | 1. Definition of SPHS                                                                                                                                                                                               | 2. Measuring SPHS                                                                                                                                                                                             | 3. Challenges to SPHS                     | 4. Improvements to SPHS                                                                                                                                                                               | 5. Sustaining or scaling change for SPHS | 6. Other |
| Shaw J, Wong I, Griffin B, Robertson M, Bhatia RS. 2017 | 2017 | Canada    | EM     |                                                                                                                                                                                                                     |                                                                                                                                                                                                               | "Increasingly complex patient population" | Emphasis must be placed on sustainability in order to protect the universal public healthcare system. "Need for comprehensive health system planning"                                                 |                                          |          |
| Shigayeva A, Coker RJ. 2015                             | 2015 | Worldwide | ED     | Sustainability is the system's resilience. From a public health perspective, sustainability is defined in relation to whether the benefit to stakeholders is sustained overtime. Financial sustainability and being | Several frameworks have been suggested, which measure determinants or dimensions of sustainability. They mostly do not consider efficiency, which is an important component of sustainability. Underrepresent |                                           | Five programmatic components in disease control programs that are important for sustainability: leadership, capacity, interactions (notions of integration), flexibility/adaptability and performance |                                          |          |

1  
2  
3  
4  
5  
6  
7  
8  
9  
10  
11  
12  
13  
14  
15  
16  
17  
18  
19  
20  
21  
22  
23  
24  
25  
26  
27  
28  
29  
30  
31  
32  
33  
34  
35  
36  
37  
38  
39  
40  
41  
42  
43  
44  
45  
46  
47

| <i>Article demographics</i>                                                            |             |                          |               | <i>Reason for article inclusion and summary of results</i> |                                                                                                         |                                                                                                   |                                                         |                                                 |                 |
|----------------------------------------------------------------------------------------|-------------|--------------------------|---------------|------------------------------------------------------------|---------------------------------------------------------------------------------------------------------|---------------------------------------------------------------------------------------------------|---------------------------------------------------------|-------------------------------------------------|-----------------|
| <b>Reference</b>                                                                       | <b>Year</b> | <b>Country</b>           | <b>Type *</b> | <b>1. Definition of SPHS</b>                               | <b>2. Measuring SPHS</b>                                                                                | <b>3. Challenges to SPHS</b>                                                                      | <b>4. Improvements to SPHS</b>                          | <b>5. Sustaining or scaling change for SPHS</b> | <b>6. Other</b> |
|                                                                                        |             |                          |               | responsive to the consumer wishes are also important       | ted field: of 108 studies in systematic review, only two looked at SPHS (Lafond 1995a; Pammolli et al.) |                                                                                                   |                                                         |                                                 |                 |
| Solon, O., K. Woo, S. A. Quimbo, R. Shimkhada, J. Florentino, and J. W. Peabody. 2009. | 2009        | Philippines              | EM            |                                                            | Developed Q* to measure quality of hospital performance across a range of facilities                    |                                                                                                   |                                                         |                                                 |                 |
| Sonnenreich P, Geisler L. 2016                                                         | 2016        | United States of America | ED            |                                                            | Financial issues of rising healthcare costs and decreasing affordability                                | Financial unsustainability in the system, (e.g., that 30% of healthcare spending is wasteful) and | The initiation of a value-based formulary in pharmacies |                                                 |                 |

| <i>Article demographics</i>                                                |      |                          |        | <i>Reason for article inclusion and summary of results</i> |                            |                                                                                                                                                                                                                                                                          |                                                                                                                        |                                                                                                       |          |
|----------------------------------------------------------------------------|------|--------------------------|--------|------------------------------------------------------------|----------------------------|--------------------------------------------------------------------------------------------------------------------------------------------------------------------------------------------------------------------------------------------------------------------------|------------------------------------------------------------------------------------------------------------------------|-------------------------------------------------------------------------------------------------------|----------|
| Reference                                                                  | Year | Country                  | Type * | 1. Definition of SPHS                                      | 2. Measuring SPHS          | 3. Challenges to SPHS                                                                                                                                                                                                                                                    | 4. Improvements to SPHS                                                                                                | 5. Sustaining or scaling change for SPHS                                                              | 6. Other |
|                                                                            |      |                          |        |                                                            |                            | trying to balance this with allowing patients to access new expensive medicines. But a new way to look at it would be to analyse the <i>value</i> of the drug. There is also a problem with patient adherence to medications, especially when they have a higher expense |                                                                                                                        |                                                                                                       |          |
| Stockdale, S. E., J. Zuchowski, L. V. Rubenstein, N. Sapir, E. M. Yano, L. | 2018 | United States of America | EM     |                                                            | Through interview analysis | Barriers to sustained improvement included a lack of collaborative working between local practice leaders; another                                                                                                                                                       | Through the introduction of quality care councils and an evidence-based quality-improvement project aimed at improving | Assessed project completion and spread and found it was important to have mechanisms by which to hold |          |

1  
2  
3  
4  
5  
6  
7  
8  
9  
10  
11  
12  
13  
14  
15  
16  
17  
18  
19  
20  
21  
22  
23  
24  
25  
26  
27  
28  
29  
30  
31  
32  
33  
34  
35  
36  
37  
38  
39  
40  
41  
42  
43  
44  
45  
46  
47

| <i>Article demographics</i>                                                  |             |                |               | <i>Reason for article inclusion and summary of results</i> |                          |                                                                                                                                                                                                                                                         |                                                                                                                                                                                                                                                                       |                                                                                               |                 |
|------------------------------------------------------------------------------|-------------|----------------|---------------|------------------------------------------------------------|--------------------------|---------------------------------------------------------------------------------------------------------------------------------------------------------------------------------------------------------------------------------------------------------|-----------------------------------------------------------------------------------------------------------------------------------------------------------------------------------------------------------------------------------------------------------------------|-----------------------------------------------------------------------------------------------|-----------------|
| <b>Reference</b>                                                             | <b>Year</b> | <b>Country</b> | <b>Type *</b> | <b>1. Definition of SPHS</b>                               | <b>2. Measuring SPHS</b> | <b>3. Challenges to SPHS</b>                                                                                                                                                                                                                            | <b>4. Improvements to SPHS</b>                                                                                                                                                                                                                                        | <b>5. Sustaining or scaling change for SPHS</b>                                               | <b>6. Other</b> |
| Altman, J. J. Fickel, S. McDougall, T. Dresselhaus, and A. B. Hamilton. 2016 |             |                |               |                                                            |                          | challenge is balancing time that could be spent on patients to be attributed to the 'extra work' of the project                                                                                                                                         | disciplinary leadership, aligning frontline improvement innovation and assessing implementation designs                                                                                                                                                               | frontline innovations would be suitable for spread (but does not research the impact of this) |                 |
| Stoelwinder JU, Paolucci F. 2009                                             | 2009        | Netherlands    | ED            |                                                            |                          | Growth rate of the Australian health system is financially unsustainable, with the Australian Medical Association, as well as state governments, lobbying for more funding. It is also likely that there will be significant resistance by stakeholders | Being inspired by the Netherlands new system of health reform, including policy objectives of durability (sustainability), solidarity (equity), choice, quality and efficiency. Additionally, there are tools to keep citizens engaged in their healthcare decisions, |                                                                                               |                 |

| <i>Article demographics</i> |      |           |        | <i>Reason for article inclusion and summary of results</i> |                   |                                                                                                                                                                                                                                     |                                                                                                                                                                                                                            |                                          |          |
|-----------------------------|------|-----------|--------|------------------------------------------------------------|-------------------|-------------------------------------------------------------------------------------------------------------------------------------------------------------------------------------------------------------------------------------|----------------------------------------------------------------------------------------------------------------------------------------------------------------------------------------------------------------------------|------------------------------------------|----------|
| Reference                   | Year | Country   | Type * | 1. Definition of SPHS                                      | 2. Measuring SPHS | 3. Challenges to SPHS                                                                                                                                                                                                               | 4. Improvements to SPHS                                                                                                                                                                                                    | 5. Sustaining or scaling change for SPHS | 6. Other |
|                             |      |           |        |                                                            |                   | when there is suggestion of Australian health system reform                                                                                                                                                                         | including the choice of 15 health insurance providers. To avoid insurers seeking out low-risk clients, there has been a complex risk-equalisation scheme put in place                                                      |                                          |          |
| Stoelwind er JU. 2009       | 2009 | Australia | ED     |                                                            |                   | The need to address both financial and political sustainability in the health system (e.g., with rising healthcare costs, and the political structures to deal with tax payment rather than consumer payment for the health system) | Governance needs to be established for the "healthy Australia accord", the federal government should progressively take over funding responsibilities for Medicare, and a funding model called "Medicare select" should be |                                          |          |

1  
2  
3  
4  
5  
6  
7  
8  
9  
10  
11  
12  
13  
14  
15  
16  
17  
18  
19  
20  
21  
22  
23  
24  
25  
26  
27  
28  
29  
30  
31  
32  
33  
34  
35  
36  
37  
38  
39  
40  
41  
42  
43  
44  
45  
46  
47

| <i>Article demographics</i> |             |                |               | <i>Reason for article inclusion and summary of results</i> |                                                                                                                                                                                                                                                     |                                                                                                                                                                                                                                          |                                                                                       |                                                 |                 |
|-----------------------------|-------------|----------------|---------------|------------------------------------------------------------|-----------------------------------------------------------------------------------------------------------------------------------------------------------------------------------------------------------------------------------------------------|------------------------------------------------------------------------------------------------------------------------------------------------------------------------------------------------------------------------------------------|---------------------------------------------------------------------------------------|-------------------------------------------------|-----------------|
| <b>Reference</b>            | <b>Year</b> | <b>Country</b> | <b>Type *</b> | <b>1. Definition of SPHS</b>                               | <b>2. Measuring SPHS</b>                                                                                                                                                                                                                            | <b>3. Challenges to SPHS</b>                                                                                                                                                                                                             | <b>4. Improvements to SPHS</b>                                                        | <b>5. Sustaining or scaling change for SPHS</b> | <b>6. Other</b> |
|                             |             |                |               |                                                            |                                                                                                                                                                                                                                                     |                                                                                                                                                                                                                                          | established whereby public and private health models compete to allow consumer choice |                                                 |                 |
| Stuart N, Adams J. 2007     | 2007        | Canada         | ED            |                                                            | Cost of healthcare that outpaces economic growth, and a way of conceptualising this is in a comparison to Maslow's hierarchy of needs, with different levels of health need (but this adds to questions of how health need and benefit are defined) | Spending on healthcare is being pushed to unsustainable levels meaning that, in order to be sustained, spending must be taken away from other areas e.g., education, infrastructure; or increase revenue; or decrease cost of healthcare |                                                                                       |                                                 |                 |
| Taylor M. 2007              | 2007        | Australia      | ED            |                                                            |                                                                                                                                                                                                                                                     |                                                                                                                                                                                                                                          | The expansion and development                                                         |                                                 |                 |



| <i>Article demographics</i>                                                  |      |                          |        | <i>Reason for article inclusion and summary of results</i>                                                  |                                                                                                          |                                                                                                                            |                                                                                                               |                                                                                                                                    |          |
|------------------------------------------------------------------------------|------|--------------------------|--------|-------------------------------------------------------------------------------------------------------------|----------------------------------------------------------------------------------------------------------|----------------------------------------------------------------------------------------------------------------------------|---------------------------------------------------------------------------------------------------------------|------------------------------------------------------------------------------------------------------------------------------------|----------|
| Reference                                                                    | Year | Country                  | Type * | 1. Definition of SPHS                                                                                       | 2. Measuring SPHS                                                                                        | 3. Challenges to SPHS                                                                                                      | 4. Improvements to SPHS                                                                                       | 5. Sustaining or scaling change for SPHS                                                                                           | 6. Other |
|                                                                              |      |                          |        |                                                                                                             |                                                                                                          |                                                                                                                            | of the role of nurse practitioners (NPs) e.g. By improving access to healthcare in remote and rural Australia |                                                                                                                                    |          |
| Thompson RE. 1998                                                            | 1998 | United States of America | ED     | Sustainability defined as meeting the needs of the present whilst guarding resources for future generations |                                                                                                          | Financial and moral factors that influence physician decisions, which have ultimately been influenced by politics and laws |                                                                                                               | "Managed care" needs to mature and evolve through supporting teaching, research, patient care and care for their staff             |          |
| Tricco, A. C., H. M. Ashoor, R. Cardoso, H. MacDonal d, E. Cogo, M. Kastner, | 2016 | Canada                   | RA     |                                                                                                             | Scoping review to see what knowledge could be gained from studies aiming to use knowledge translation to |                                                                                                                            |                                                                                                               | Specifically examined articles that had follow-up one or more years after the initial test, or continued beyond the funding period |          |

1  
2  
3  
4  
5  
6  
7  
8  
9  
10  
11  
12  
13  
14  
15  
16  
17  
18  
19  
20  
21  
22  
23  
24  
25  
26  
27  
28  
29  
30  
31  
32  
33  
34  
35  
36  
37  
38  
39  
40  
41  
42  
43  
44  
45  
46  
47

| <i>Article demographics</i>                                      |             |                |               | <i>Reason for article inclusion and summary of results</i> |                                                      |                              |                                                                                                                                                                                                                                                                                                         |                                                 |                 |
|------------------------------------------------------------------|-------------|----------------|---------------|------------------------------------------------------------|------------------------------------------------------|------------------------------|---------------------------------------------------------------------------------------------------------------------------------------------------------------------------------------------------------------------------------------------------------------------------------------------------------|-------------------------------------------------|-----------------|
| <b>Reference</b>                                                 | <b>Year</b> | <b>Country</b> | <b>Type *</b> | <b>1. Definition of SPHS</b>                               | <b>2. Measuring SPHS</b>                             | <b>3. Challenges to SPHS</b> | <b>4. Improvements to SPHS</b>                                                                                                                                                                                                                                                                          | <b>5. Sustaining or scaling change for SPHS</b> | <b>6. Other</b> |
| L. Perrier, A. McKibbon, J. M. Grimshaw, and S. E. Straus. 2016. |             |                |               |                                                            | improve health of patients managing chronic diseases |                              |                                                                                                                                                                                                                                                                                                         |                                                 |                 |
| Tsasis P. 2009                                                   | 2009        | Canada         | ED            |                                                            |                                                      |                              | The potential of improving access to home care for older patients with one or more chronic illnesses, through improving funding for these programs. Additionally, interdisciplinary teamwork and having a patient-centred approach to care has the potential to improve health system sustainability by |                                                 |                 |

| <i>Article demographics</i>                    |      |           |        | <i>Reason for article inclusion and summary of results</i> |                   |                                                                                                                                                                                                                                                                                                      |                                                                       |                                                                                                                                                                                                                                                                                                                             |          |
|------------------------------------------------|------|-----------|--------|------------------------------------------------------------|-------------------|------------------------------------------------------------------------------------------------------------------------------------------------------------------------------------------------------------------------------------------------------------------------------------------------------|-----------------------------------------------------------------------|-----------------------------------------------------------------------------------------------------------------------------------------------------------------------------------------------------------------------------------------------------------------------------------------------------------------------------|----------|
| Reference                                      | Year | Country   | Type * | 1. Definition of SPHS                                      | 2. Measuring SPHS | 3. Challenges to SPHS                                                                                                                                                                                                                                                                                | 4. Improvements to SPHS                                               | 5. Sustaining or scaling change for SPHS                                                                                                                                                                                                                                                                                    | 6. Other |
|                                                |      |           |        |                                                            |                   |                                                                                                                                                                                                                                                                                                      | minimising drug interactions and conflicting advice given to patients |                                                                                                                                                                                                                                                                                                                             |          |
| Van de Pas R, Hill PS, Hammonds R, et al. 2017 | 2017 | Worldwide | ED     |                                                            |                   | The current sustainable development goals (SDGs) are superficial, and more political debate on structure, policy and agency are needed to bridge the gap and overcome existing health injustices. Also noted that many of the SDGs, although not specifically health related, have impacts on health |                                                                       | Stewardship embodying the establishment of norms, values and rules to guide policy development and advocacy for global health across sectors. Also recognised as important is the production of global public goods, the mobilization of global solidarity and the management of externalities e.g., governments, states or |          |

1  
2  
3  
4  
5  
6  
7  
8  
9  
10  
11  
12  
13  
14  
15  
16  
17  
18  
19  
20  
21  
22  
23  
24  
25  
26  
27  
28  
29  
30  
31  
32  
33  
34  
35  
36  
37  
38  
39  
40  
41  
42  
43  
44  
45  
46  
47

| <i>Article demographics</i>    |             |                |               | <i>Reason for article inclusion and summary of results</i> |                          |                                                                                                                                                                                                                                                                                                         |                                                               |                                                 |                 |
|--------------------------------|-------------|----------------|---------------|------------------------------------------------------------|--------------------------|---------------------------------------------------------------------------------------------------------------------------------------------------------------------------------------------------------------------------------------------------------------------------------------------------------|---------------------------------------------------------------|-------------------------------------------------|-----------------|
| <b>Reference</b>               | <b>Year</b> | <b>Country</b> | <b>Type *</b> | <b>1. Definition of SPHS</b>                               | <b>2. Measuring SPHS</b> | <b>3. Challenges to SPHS</b>                                                                                                                                                                                                                                                                            | <b>4. Improvements to SPHS</b>                                | <b>5. Sustaining or scaling change for SPHS</b> | <b>6. Other</b> |
|                                |             |                |               |                                                            |                          |                                                                                                                                                                                                                                                                                                         |                                                               | transnational bodies                            |                 |
| Veillard J, Denny K. 2014      | 2014        | Canada         | ED            |                                                            |                          | The majority of healthcare spending is on a small proportion of patients                                                                                                                                                                                                                                | Need for more consistency in practice and delivery methods    |                                                 |                 |
| Wakerman J, Humphreys JS. 2011 | 2011        | Australia      | RA            |                                                            |                          | Addressing rural and remote areas in Australia. These areas are known for their deficits e.g., high morbidity and mortality, workplace shortages, lack of services and high cost of care delivery. Systems need to realise there is no one-size-fits-all solution, and changes need to align the on the | A systematic approach is needed to improve primary healthcare |                                                 |                 |

| <i>Article demographics</i>    |      |           |        | <i>Reason for article inclusion and summary of results</i> |                   |                                                                                                                                                                                                                |                                                                                                                                                                                                                                                                                                                 |                                          |          |
|--------------------------------|------|-----------|--------|------------------------------------------------------------|-------------------|----------------------------------------------------------------------------------------------------------------------------------------------------------------------------------------------------------------|-----------------------------------------------------------------------------------------------------------------------------------------------------------------------------------------------------------------------------------------------------------------------------------------------------------------|------------------------------------------|----------|
| Reference                      | Year | Country   | Type * | 1. Definition of SPHS                                      | 2. Measuring SPHS | 3. Challenges to SPHS                                                                                                                                                                                          | 4. Improvements to SPHS                                                                                                                                                                                                                                                                                         | 5. Sustaining or scaling change for SPHS | 6. Other |
|                                |      |           |        |                                                            |                   | micro-scale health service level as well as the macro-scale external policy environment                                                                                                                        |                                                                                                                                                                                                                                                                                                                 |                                          |          |
| Wakerman J, Humphreys JS. 2013 | 2013 | Australia | ED     |                                                            |                   | Tension between national health workforce policy initiatives and demographic, socioeconomic and political forces. Overall, healthcare service access and the health status are worse in non-metropolitan areas | The aim is to provide accessible, affordable, appropriate healthcare regardless of geography. Potential improvement in the number of doctors in regional and rural areas if there is a change in the culture of thinking of rural areas as negative, and through the increased number of medical students being |                                          |          |

1  
2  
3  
4  
5  
6  
7  
8  
9  
10  
11  
12  
13  
14  
15  
16  
17  
18  
19  
20  
21  
22  
23  
24  
25  
26  
27  
28  
29  
30  
31  
32  
33  
34  
35  
36  
37  
38  
39  
40  
41  
42  
43  
44  
45  
46  
47

| <i>Article demographics</i>                                   |             |                |               | <i>Reason for article inclusion and summary of results</i> |                          |                                                          |                                                                                                                                                                                                                                                                                     |                                                                     |                 |
|---------------------------------------------------------------|-------------|----------------|---------------|------------------------------------------------------------|--------------------------|----------------------------------------------------------|-------------------------------------------------------------------------------------------------------------------------------------------------------------------------------------------------------------------------------------------------------------------------------------|---------------------------------------------------------------------|-----------------|
| <b>Reference</b>                                              | <b>Year</b> | <b>Country</b> | <b>Type *</b> | <b>1. Definition of SPHS</b>                               | <b>2. Measuring SPHS</b> | <b>3. Challenges to SPHS</b>                             | <b>4. Improvements to SPHS</b>                                                                                                                                                                                                                                                      | <b>5. Sustaining or scaling change for SPHS</b>                     | <b>6. Other</b> |
|                                                               |             |                |               |                                                            |                          |                                                          | trained appropriately for regional and remote work, and addressing the other workforces that collaborate with the rural services (e.g., funding, infrastructure, governance), and increasing the accountability of the health service through agreed indicators and output measures |                                                                     |                 |
| Woodward, G. L., A. Iverson, R. Harvey, and P. G. Blake. 2015 | 2015        | Canada         | ED            |                                                            |                          | Recognises the challenge of bridging policy and practice |                                                                                                                                                                                                                                                                                     | Requires leadership, transparency, accountability and communication |                 |

| <i>Article demographics</i>               |      |                           |        | <i>Reason for article inclusion and summary of results</i> |                                     |                                                                       |                         |                                                                                                                                                                                                                                                                                                      |          |
|-------------------------------------------|------|---------------------------|--------|------------------------------------------------------------|-------------------------------------|-----------------------------------------------------------------------|-------------------------|------------------------------------------------------------------------------------------------------------------------------------------------------------------------------------------------------------------------------------------------------------------------------------------------------|----------|
| Reference                                 | Year | Country                   | Type * | 1. Definition of SPHS                                      | 2. Measuring SPHS                   | 3. Challenges to SPHS                                                 | 4. Improvements to SPHS | 5. Sustaining or scaling change for SPHS                                                                                                                                                                                                                                                             | 6. Other |
| Wutzke, S., M. Benton, and R. Verma. 2016 | 2016 | Australia and New Zealand | EM     |                                                            |                                     |                                                                       |                         | Four general factors were found to be present in successful interventions: 1. having a sound business case for change; 2. being prepared for the change process and adapting to different contexts; 3. promoting change through stakeholders; 4. ensuring support through the implementation process |          |
| Zhao Y, Russell DJ, Guthridge             | 2017 | Australia                 | EM     |                                                            | Regression analyses of payroll data | Managing fluctuations in funding and the translation of this to staff |                         |                                                                                                                                                                                                                                                                                                      |          |

1  
2  
3  
4  
5  
6  
7  
8  
9  
10  
11  
12  
13  
14  
15  
16  
17  
18  
19  
20  
21  
22  
23  
24  
25  
26  
27  
28  
29  
30  
31  
32  
33  
34  
35  
36  
37  
38  
39  
40  
41  
42  
43  
44  
45  
46  
47

| <i>Article demographics</i>                  |             |                |               | <i>Reason for article inclusion and summary of results</i> |                          |                                                                                        |                                                                                                                                                                                                |                                                 |                 |
|----------------------------------------------|-------------|----------------|---------------|------------------------------------------------------------|--------------------------|----------------------------------------------------------------------------------------|------------------------------------------------------------------------------------------------------------------------------------------------------------------------------------------------|-------------------------------------------------|-----------------|
| <b>Reference</b>                             | <b>Year</b> | <b>Country</b> | <b>Type *</b> | <b>1. Definition of SPHS</b>                               | <b>2. Measuring SPHS</b> | <b>3. Challenges to SPHS</b>                                                           | <b>4. Improvements to SPHS</b>                                                                                                                                                                 | <b>5. Sustaining or scaling change for SPHS</b> | <b>6. Other</b> |
| S, et al. 2017                               |             |                |               |                                                            |                          |                                                                                        |                                                                                                                                                                                                |                                                 |                 |
| Pisco L, Pinto LF. 2020                      | 2020        | Portugal       | ED            |                                                            |                          | Comorbidity and increasing age                                                         | Suggests that primary healthcare and preventive care (e.g., maternal health, disease prevention, vaccines etc.) is a strong investment to increase productivity and strengthen social cohesion |                                                 |                 |
| Ganann R, Peacock S, Garnett A, et al. 2019. | 2019        | Canada         | ED            |                                                            |                          | Discusses how an ageing population presses the need for sustainable healthcare system. | Capacity building through health services and policy research training in the following competencies: understanding health systems and the policy-making process, integrated knowledge         |                                                 |                 |



1  
2  
3  
4  
5  
6  
7  
8  
9  
10  
11  
12  
13  
14  
15  
16  
17  
18  
19  
20  
21  
22  
23  
24  
25  
26  
27  
28  
29  
30  
31  
32  
33  
34  
35  
36  
37  
38  
39  
40  
41  
42  
43  
44  
45  
46  
47

| <i>Article demographics</i> |             |                |               | <i>Reason for article inclusion and summary of results</i> |                          |                              |                                                                                                                                                                                                                                                                                                                                                                                                                    |                                                 |                 |
|-----------------------------|-------------|----------------|---------------|------------------------------------------------------------|--------------------------|------------------------------|--------------------------------------------------------------------------------------------------------------------------------------------------------------------------------------------------------------------------------------------------------------------------------------------------------------------------------------------------------------------------------------------------------------------|-------------------------------------------------|-----------------|
| <b>Reference</b>            | <b>Year</b> | <b>Country</b> | <b>Type *</b> | <b>1. Definition of SPHS</b>                               | <b>2. Measuring SPHS</b> | <b>3. Challenges to SPHS</b> | <b>4. Improvements to SPHS</b>                                                                                                                                                                                                                                                                                                                                                                                     | <b>5. Sustaining or scaling change for SPHS</b> | <b>6. Other</b> |
|                             |             |                |               |                                                            |                          |                              | transition activities tailored to the specific needs of primary healthcare clinicians and policy making, networking, negotiation an dialogue, project management, interdisciplinary collaborations among patients researchers health practitioners and policy makers, change management implementation, leadership mentorships and collaboration, analysis and evaluation of health related policies and programs, |                                                 |                 |

1  
2  
3  
4  
5  
6  
7  
8  
9  
10  
11  
12  
13  
14  
15  
16  
17  
18  
19  
20  
21  
22  
23  
24  
25  
26  
27  
28  
29  
30  
31  
32  
33  
34  
35  
36  
37  
38  
39  
40  
41  
42  
43  
44  
45  
46  
47

| <i>Article demographics</i>                    |      |         |        | <i>Reason for article inclusion and summary of results</i>           |                                                                             |                                                                                                                                 |                                                                                                                                                                  |                                          |          |
|------------------------------------------------|------|---------|--------|----------------------------------------------------------------------|-----------------------------------------------------------------------------|---------------------------------------------------------------------------------------------------------------------------------|------------------------------------------------------------------------------------------------------------------------------------------------------------------|------------------------------------------|----------|
| Reference                                      | Year | Country | Type * | 1. Definition of SPHS                                                | 2. Measuring SPHS                                                           | 3. Challenges to SPHS                                                                                                           | 4. Improvements to SPHS                                                                                                                                          | 5. Sustaining or scaling change for SPHS | 6. Other |
|                                                |      |         |        |                                                                      |                                                                             |                                                                                                                                 | ensuring capacity for meaningful patient engagement, mobilising existing expertise, support careers, building capacity to apply research to real-world problems. |                                          |          |
| Jessup RL, O'Connor DA, Putrik P, et al. 2019. | 2018 | Global  | ED     |                                                                      |                                                                             | Increasing pressures from ageing population, increasingly prevalent chronic disease, higher cost of tests, workforce shortages. |                                                                                                                                                                  |                                          |          |
| Vainieri M, Noto G, Ferre F, Rosella LC. 2020. | 2020 | Global  | ED     | Defines sustainability as the ability of a health system to meet the | broadly discusses how performance monitoring or measurement isn't currently | Overall short-term bias and perspective of the health system impacts establishing                                               | Challenges listed include the need for improvement in data collection management, the need to adopt a patient-based                                              |                                          |          |

| <i>Article demographics</i>                                              |      |         |        | <i>Reason for article inclusion and summary of results</i> |                                                                                                                                                      |                                                                                                                         |                                                                 |                                          |          |
|--------------------------------------------------------------------------|------|---------|--------|------------------------------------------------------------|------------------------------------------------------------------------------------------------------------------------------------------------------|-------------------------------------------------------------------------------------------------------------------------|-----------------------------------------------------------------|------------------------------------------|----------|
| Reference                                                                | Year | Country | Type * | 1. Definition of SPHS                                      | 2. Measuring SPHS                                                                                                                                    | 3. Challenges to SPHS                                                                                                   | 4. Improvements to SPHS                                         | 5. Sustaining or scaling change for SPHS | 6. Other |
|                                                                          |      |         |        | needs of present and future.                               | sensitive enough to monitor health system sustainability                                                                                             | health system sustainability                                                                                            | perspective, and how performance measures are used in practice. |                                          |          |
| Lo Sardo DR, Thurner S, Sorger J, Duftschmid G, Endel G, Klimek P. 2019. | 2019 | Austria | EM     |                                                            | Measures resilience, however, the paper argues that to be sustainable health systems must be resilient                                               | Rising costs, chronic conditions, and ageing                                                                            | To counter unsustainability health systems must be resilient    |                                          |          |
| Williams I, Allen K, Plahe G. 2019.                                      | 2019 | England | EM     |                                                            | Rationing of finances and how this occurs in reality, with reference to the 'seven forms of rationing' (and how this can be applied to see if health | Recognition that there are perceived barriers to timely release of central funding, and the need to prioritise spending |                                                                 |                                          |          |

1  
2  
3  
4  
5  
6  
7  
8  
9  
10  
11  
12  
13  
14  
15  
16  
17  
18  
19  
20  
21  
22  
23  
24  
25  
26  
27  
28  
29  
30  
31  
32  
33  
34  
35  
36  
37  
38  
39  
40  
41  
42  
43  
44  
45  
46  
47

| <i>Article demographics</i>                         |             |                                      |               | <i>Reason for article inclusion and summary of results</i> |                                                                           |                                                                                                                                                                                        |                                                                                                        |                                                 |                 |
|-----------------------------------------------------|-------------|--------------------------------------|---------------|------------------------------------------------------------|---------------------------------------------------------------------------|----------------------------------------------------------------------------------------------------------------------------------------------------------------------------------------|--------------------------------------------------------------------------------------------------------|-------------------------------------------------|-----------------|
| <b>Reference</b>                                    | <b>Year</b> | <b>Country</b>                       | <b>Type *</b> | <b>1. Definition of SPHS</b>                               | <b>2. Measuring SPHS</b>                                                  | <b>3. Challenges to SPHS</b>                                                                                                                                                           | <b>4. Improvements to SPHS</b>                                                                         | <b>5. Sustaining or scaling change for SPHS</b> | <b>6. Other</b> |
|                                                     |             |                                      |               |                                                            | systems are sustainable) - e.g., dilution via spreading thin of resources |                                                                                                                                                                                        |                                                                                                        |                                                 |                 |
| Ammentorp J, Bigi S, Silverman J, et al. 2021.      | 2021        | Australia, Ireland, Austria, Denmark | EM            |                                                            |                                                                           | Challenges to implementing programs: convincing investors, involving stakeholders, locating change agents                                                                              | Communication training programs à improving competencies and knowledge related to patient centred care |                                                 |                 |
| Braithwaite J, Mannion R, Matsuyama Y, et al. 2018. | 2018        | Global                               | ED            |                                                            |                                                                           | Common pressures or stressors are manifesting in every healthcare system; these include scarcity of financial and staff resources, expectations of the public, and maintaining healthy |                                                                                                        |                                                 |                 |

| <i>Article demographics</i> |      |         |        | <i>Reason for article inclusion and summary of results</i>                                                                                          |                   |                                                                                           |                                                                                                                                                                                                                                                                                                                               |                                          |          |
|-----------------------------|------|---------|--------|-----------------------------------------------------------------------------------------------------------------------------------------------------|-------------------|-------------------------------------------------------------------------------------------|-------------------------------------------------------------------------------------------------------------------------------------------------------------------------------------------------------------------------------------------------------------------------------------------------------------------------------|------------------------------------------|----------|
| Reference                   | Year | Country | Type * | 1. Definition of SPHS                                                                                                                               | 2. Measuring SPHS | 3. Challenges to SPHS                                                                     | 4. Improvements to SPHS                                                                                                                                                                                                                                                                                                       | 5. Sustaining or scaling change for SPHS | 6. Other |
|                             |      |         |        |                                                                                                                                                     |                   | relationships with multiple stakeholders                                                  |                                                                                                                                                                                                                                                                                                                               |                                          |          |
| Buttigieg SC. 2019.         | 2019 | Global  | ED     | Sustainability in healthcare defined as “key task for health policy-makers to withstand social, financial, and ecological pressures and challenges” |                   | Challenges discussed include service delivery, human resources, leadership and governance | “Among these include an open innovation strategy that redesigns sharing intellectual property, resources, and data – and therefore introducing flexibility, easier accessibility to libraries and collections of molecular entities, as well as opportunities for external researchers to work alongside company scientists.” |                                          |          |
| Byskov J, Maluka S,         | 2019 | Global  | RA     |                                                                                                                                                     |                   |                                                                                           |                                                                                                                                                                                                                                                                                                                               | “The debate on defining and              |          |

1  
2  
3  
4  
5  
6  
7  
8  
9  
10  
11  
12  
13  
14  
15  
16  
17  
18  
19  
20  
21  
22  
23  
24  
25  
26  
27  
28  
29  
30  
31  
32  
33  
34  
35  
36  
37  
38  
39  
40  
41  
42  
43  
44  
45  
46  
47

| <i>Article demographics</i> |             |                |               | <i>Reason for article inclusion and summary of results</i> |                          |                              |                                |                                                                                                                                                                                                                                                                                                                                                                                         |                 |
|-----------------------------|-------------|----------------|---------------|------------------------------------------------------------|--------------------------|------------------------------|--------------------------------|-----------------------------------------------------------------------------------------------------------------------------------------------------------------------------------------------------------------------------------------------------------------------------------------------------------------------------------------------------------------------------------------|-----------------|
| <b>Reference</b>            | <b>Year</b> | <b>Country</b> | <b>Type *</b> | <b>1. Definition of SPHS</b>                               | <b>2. Measuring SPHS</b> | <b>3. Challenges to SPHS</b> | <b>4. Improvements to SPHS</b> | <b>5. Sustaining or scaling change for SPHS</b>                                                                                                                                                                                                                                                                                                                                         | <b>6. Other</b> |
| Marchal B, et al. 2019.     |             |                |               |                                                            |                          |                              |                                | operationalizing more sustainable systems approaches by more strongly including a priority setting and a decision-making process guidance raises the question whether (1) technical evidence-based information is most important and can be improved by more participatory value and specific context-based approaches (Baltussen et al., 2013) or (2) the participatory democratically |                 |

For peer review only

| <i>Article demographics</i>                    |      |         |        | <i>Reason for article inclusion and summary of results</i> |                   |                                                                                                                             |                                                                                                                                                                                                                                                         |                                                                                                                                 |          |
|------------------------------------------------|------|---------|--------|------------------------------------------------------------|-------------------|-----------------------------------------------------------------------------------------------------------------------------|---------------------------------------------------------------------------------------------------------------------------------------------------------------------------------------------------------------------------------------------------------|---------------------------------------------------------------------------------------------------------------------------------|----------|
| Reference                                      | Year | Country | Type * | 1. Definition of SPHS                                      | 2. Measuring SPHS | 3. Challenges to SPHS                                                                                                       | 4. Improvements to SPHS                                                                                                                                                                                                                                 | 5. Sustaining or scaling change for SPHS                                                                                        | 6. Other |
|                                                |      |         |        |                                                            |                   |                                                                                                                             |                                                                                                                                                                                                                                                         | based approaches (Biehl and Petryna, 2013; Daniels et al., 2015) are most important, but need support from technical evidence.” |          |
| O'Brien N, Li R, Isaranuwatchai W, et al. 2019 | 2019 | Global  | ED     |                                                            |                   | Paper looking at HTA as a means of improving HSS. Cites confusion over definition of HTA as a barrier to its implementation | "Health technology assessment (HTA) is a multi-disciplinary exercise for assessing the clinical and cost-effectiveness of technologies in the form mainly of programs of health (and sometimes social) care, together with their associated structural, |                                                                                                                                 |          |

1  
2  
3  
4  
5  
6  
7  
8  
9  
10  
11  
12  
13  
14  
15  
16  
17  
18  
19  
20  
21  
22  
23  
24  
25  
26  
27  
28  
29  
30  
31  
32  
33  
34  
35  
36  
37  
38  
39  
40  
41  
42  
43  
44  
45  
46  
47

| <i>Article demographics</i>                          |             |                |               | <i>Reason for article inclusion and summary of results</i> |                          |                                                                                                                                                   |                                                                                                                                                                                                                       |                                                 |                 |
|------------------------------------------------------|-------------|----------------|---------------|------------------------------------------------------------|--------------------------|---------------------------------------------------------------------------------------------------------------------------------------------------|-----------------------------------------------------------------------------------------------------------------------------------------------------------------------------------------------------------------------|-------------------------------------------------|-----------------|
| <b>Reference</b>                                     | <b>Year</b> | <b>Country</b> | <b>Type *</b> | <b>1. Definition of SPHS</b>                               | <b>2. Measuring SPHS</b> | <b>3. Challenges to SPHS</b>                                                                                                                      | <b>4. Improvements to SPHS</b>                                                                                                                                                                                        | <b>5. Sustaining or scaling change for SPHS</b> | <b>6. Other</b> |
|                                                      |             |                |               |                                                            |                          |                                                                                                                                                   | procedural and implementation arrangements". Governments consequently need to take responsibility for the development of strong and sustainable health systems                                                        |                                                 |                 |
| Hanney S, Kanya L, Pokhrel S, Jones T, Boaz A. 2020. | 2020        | Global         | RA            |                                                            |                          | Research funding is a major barrier to HS research and therefore health systems cannot be improved. Discusses waste in research and fragmentation | "WHO Health Evidence Network Synthesis Reports. What is the evidence on policies, interventions and tools for establishing and/or strengthening national health research systems and their effectiveness? Copenhagen: |                                                 |                 |



| <i>Article demographics</i>                             |      |         |             | <i>Reason for article inclusion and summary of results</i> |                   |                             |                                                                                                                                                                                  |                                          |          |
|---------------------------------------------------------|------|---------|-------------|------------------------------------------------------------|-------------------|-----------------------------|----------------------------------------------------------------------------------------------------------------------------------------------------------------------------------|------------------------------------------|----------|
| Reference                                               | Year | Country | Type *      | 1. Definition of SPHS                                      | 2. Measuring SPHS | 3. Challenges to SPHS       | 4. Improvements to SPHS                                                                                                                                                          | 5. Sustaining or scaling change for SPHS | 6. Other |
|                                                         |      |         |             |                                                            |                   |                             | WHO Regional Office for Europe"                                                                                                                                                  |                                          |          |
| Bentley C, Peacock S, Abelson J, et al. 2019.           | 2019 | Canada  | EM          |                                                            |                   | Expensive cancer treatment. | The paper calls to use cost effective decisions and involve patients when making cancer funding decisions. Also, to disinvestment if that treatment becomes less effective later |                                          |          |
| Braithwaite J, Vincent C, Nicklin W, Amalberti R. 2019. | 2019 | Global  | ED          |                                                            |                   |                             | We will need to reflect a reasons health journey overall in evaluations and treatment                                                                                            |                                          |          |
| Braithwaite J, Zurynski Y, Ludlow K, Holt J, Augustsso  | 2019 | Global  | EM protocol | Defines fiscal sustainability, equality                    |                   |                             |                                                                                                                                                                                  |                                          |          |

1  
2  
3  
4  
5  
6  
7  
8  
9  
10  
11  
12  
13  
14  
15  
16  
17  
18  
19  
20  
21  
22  
23  
24  
25  
26  
27  
28  
29  
30  
31  
32  
33  
34  
35  
36  
37  
38  
39  
40  
41  
42  
43  
44  
45  
46  
47

| <i>Article demographics</i>                                                           |             |                |               | <i>Reason for article inclusion and summary of results</i> |                          |                              |                                |                                                                                                                                                                                                                                                                                                                                                             |                 |
|---------------------------------------------------------------------------------------|-------------|----------------|---------------|------------------------------------------------------------|--------------------------|------------------------------|--------------------------------|-------------------------------------------------------------------------------------------------------------------------------------------------------------------------------------------------------------------------------------------------------------------------------------------------------------------------------------------------------------|-----------------|
| <b>Reference</b>                                                                      | <b>Year</b> | <b>Country</b> | <b>Type *</b> | <b>1. Definition of SPHS</b>                               | <b>2. Measuring SPHS</b> | <b>3. Challenges to SPHS</b> | <b>4. Improvements to SPHS</b> | <b>5. Sustaining or scaling change for SPHS</b>                                                                                                                                                                                                                                                                                                             | <b>6. Other</b> |
| n H, Campbell M. 2019.                                                                |             |                |               |                                                            |                          |                              |                                |                                                                                                                                                                                                                                                                                                                                                             |                 |
| Rudnicka E, Napierała P, Podfigurna A, Męczkowski B, Smolarczyk R, Grymowicz M. 2020. | 2020        | Global         | ED            |                                                            |                          |                              | An ageing population           | establishing a platform of innovation and change, support country planning and action, collect better global data on health ageing, promoting research that addresses the current and future needs of older people, aligning health systems to the needs of older people, laying the foundations for a long-term care system in every country, Ensuring the |                 |

| <i>Article demographics</i> |      |         |        | <i>Reason for article inclusion and summary of results</i> |                                                                                                                                              |                       |                         |                                                                                                                                                                                                                |          |
|-----------------------------|------|---------|--------|------------------------------------------------------------|----------------------------------------------------------------------------------------------------------------------------------------------|-----------------------|-------------------------|----------------------------------------------------------------------------------------------------------------------------------------------------------------------------------------------------------------|----------|
| Reference                   | Year | Country | Type * | 1. Definition of SPHS                                      | 2. Measuring SPHS                                                                                                                            | 3. Challenges to SPHS | 4. Improvements to SPHS | 5. Sustaining or scaling change for SPHS                                                                                                                                                                       | 6. Other |
|                             |      |         |        |                                                            |                                                                                                                                              |                       |                         | human resources necessary for integrated care, undertaking a global campaign to combat ageism, defining an economic case for investment, Enhancing the global network for age-friendly cities and communities. |          |
| Shen H, Sui Y, Fu Y. 2020.  | 2020 | Global  | EM     |                                                            | This paper looks at apply social choice theory and the Stochastic Multicriteria Acceptability Analysis for group decision making (SMAA-2) to |                       |                         |                                                                                                                                                                                                                |          |

1  
2  
3  
4  
5  
6  
7  
8  
9  
10  
11  
12  
13  
14  
15  
16  
17  
18  
19  
20  
21  
22  
23  
24  
25  
26  
27  
28  
29  
30  
31  
32  
33  
34  
35  
36  
37  
38  
39  
40  
41  
42  
43  
44  
45  
46  
47

| <i>Article demographics</i> |             |                |               | <i>Reason for article inclusion and summary of results</i> |                                                                                                                                                                                                                                                                                                                 |                              |                                |                                                 |                 |
|-----------------------------|-------------|----------------|---------------|------------------------------------------------------------|-----------------------------------------------------------------------------------------------------------------------------------------------------------------------------------------------------------------------------------------------------------------------------------------------------------------|------------------------------|--------------------------------|-------------------------------------------------|-----------------|
| <b>Reference</b>            | <b>Year</b> | <b>Country</b> | <b>Type *</b> | <b>1. Definition of SPHS</b>                               | <b>2. Measuring SPHS</b>                                                                                                                                                                                                                                                                                        | <b>3. Challenges to SPHS</b> | <b>4. Improvements to SPHS</b> | <b>5. Sustaining or scaling change for SPHS</b> | <b>6. Other</b> |
|                             |             |                |               |                                                            | measure the value of health systems. The measurement consistent of three metrics; access, satisfaction, and efficiency, and considers individual preference to each. The article suggested that measuring value is the ultimate goal of modern healthcare and can assist in building sustainable health systems |                              |                                |                                                 |                 |

For peer review only

| <i>Article demographics</i>                           |      |         |        | <i>Reason for article inclusion and summary of results</i> |                   |                       |                                                                                                                                                                                                                                                            |                                          |          |
|-------------------------------------------------------|------|---------|--------|------------------------------------------------------------|-------------------|-----------------------|------------------------------------------------------------------------------------------------------------------------------------------------------------------------------------------------------------------------------------------------------------|------------------------------------------|----------|
| Reference                                             | Year | Country | Type * | 1. Definition of SPHS                                      | 2. Measuring SPHS | 3. Challenges to SPHS | 4. Improvements to SPHS                                                                                                                                                                                                                                    | 5. Sustaining or scaling change for SPHS | 6. Other |
|                                                       |      |         |        |                                                            |                   |                       |                                                                                                                                                                                                                                                            |                                          |          |
| Fridell M, Edwin S, von Schreeb J, Saulnier DD. 2020. | 2020 | Global  | RA     |                                                            |                   |                       | Implies that resilience is essential to a sustainable healthcare system. Common factors contributing to resilience included: financing, highly skilled workforce, continuous collection of information at the population level, leadership and governance, |                                          |          |

1  
2  
3  
4  
5  
6  
7  
8  
9  
10  
11  
12  
13  
14  
15  
16  
17  
18  
19  
20  
21  
22  
23  
24  
25  
26  
27  
28  
29  
30  
31  
32  
33  
34  
35  
36  
37  
38  
39  
40  
41  
42  
43  
44  
45  
46  
47

| <i>Article demographics</i> |             |                |               | <i>Reason for article inclusion and summary of results</i> |                          |                                                                                                                                                                      |                                                                                                                                      |                                                                                                                                                |                 |
|-----------------------------|-------------|----------------|---------------|------------------------------------------------------------|--------------------------|----------------------------------------------------------------------------------------------------------------------------------------------------------------------|--------------------------------------------------------------------------------------------------------------------------------------|------------------------------------------------------------------------------------------------------------------------------------------------|-----------------|
| <b>Reference</b>            | <b>Year</b> | <b>Country</b> | <b>Type *</b> | <b>1. Definition of SPHS</b>                               | <b>2. Measuring SPHS</b> | <b>3. Challenges to SPHS</b>                                                                                                                                         | <b>4. Improvements to SPHS</b>                                                                                                       | <b>5. Sustaining or scaling change for SPHS</b>                                                                                                | <b>6. Other</b> |
|                             |             |                |               |                                                            |                          |                                                                                                                                                                      | medical products (such as vaccines and affordable medications), and service delivery.                                                |                                                                                                                                                |                 |
| Walsh K. 2019.              | 2019        | Global         | ED            |                                                            |                          | Limited budget: "Health systems strengthening is a challenge – how can we improve access, coverage, quality and efficiency, and still keep within a limited budget?" | Developing human resource potential through e-learning                                                                               | Broadening e-learning through online simulations, build on access (e.g., expand to mobile devices and apps)                                    |                 |
| De Santis M. 2019.          | 2019        | Global         | RA            |                                                            |                          | Change is expensive and incremental, integrated care is hard to quantify                                                                                             | Suggests that integrated care is a solution to system fragmentation, efficiency, and high costs in chronic disease and rare diseases | To achieve and scale integrated care there must be political support and commitment, strong governance, stakeholder engagement, organisational |                 |

| <i>Article demographics</i>               |      |                |        | <i>Reason for article inclusion and summary of results</i> |                   |                                                                                                   |                                                                                                                                                                                |                                                                                                                                                                                                                                |          |
|-------------------------------------------|------|----------------|--------|------------------------------------------------------------|-------------------|---------------------------------------------------------------------------------------------------|--------------------------------------------------------------------------------------------------------------------------------------------------------------------------------|--------------------------------------------------------------------------------------------------------------------------------------------------------------------------------------------------------------------------------|----------|
| Reference                                 | Year | Country        | Type * | 1. Definition of SPHS                                      | 2. Measuring SPHS | 3. Challenges to SPHS                                                                             | 4. Improvements to SPHS                                                                                                                                                        | 5. Sustaining or scaling change for SPHS                                                                                                                                                                                       | 6. Other |
|                                           |      |                |        |                                                            |                   |                                                                                                   |                                                                                                                                                                                | change, leadership, workforce education and training, patient focus/empowerment, financing incentives, ICT infrastructure and solutions, monitoring/evaluation system                                                          |          |
| Ferrelli RM, Fantini B, Taruscio D. 2019. | 2019 | European Union | ED     |                                                            |                   | Affordability and financing of equal access and healthcare delivery for people with rare diseases | Discusses networking or rare diseases providers to improve knowledge and healthcare delivery in the EU. The paper also suggests that resilience is important to sustainability | Discusses levers about to build a sustainable health system for rare diseases. Levers include organisation structure, partnerships, workforce, knowledge development, leadership and governance, and country specific context. |          |

1  
2  
3  
4  
5  
6  
7  
8  
9  
10  
11  
12  
13  
14  
15  
16  
17  
18  
19  
20  
21  
22  
23  
24  
25  
26  
27  
28  
29  
30  
31  
32  
33  
34  
35  
36  
37  
38  
39  
40  
41  
42  
43  
44  
45  
46  
47

| <i>Article demographics</i>                            |             |                |               | <i>Reason for article inclusion and summary of results</i> |                          |                                                                                                           |                                                                                                                                                                                                                                                                                                                                                                                                                              |                                                 |                 |
|--------------------------------------------------------|-------------|----------------|---------------|------------------------------------------------------------|--------------------------|-----------------------------------------------------------------------------------------------------------|------------------------------------------------------------------------------------------------------------------------------------------------------------------------------------------------------------------------------------------------------------------------------------------------------------------------------------------------------------------------------------------------------------------------------|-------------------------------------------------|-----------------|
| <b>Reference</b>                                       | <b>Year</b> | <b>Country</b> | <b>Type *</b> | <b>1. Definition of SPHS</b>                               | <b>2. Measuring SPHS</b> | <b>3. Challenges to SPHS</b>                                                                              | <b>4. Improvements to SPHS</b>                                                                                                                                                                                                                                                                                                                                                                                               | <b>5. Sustaining or scaling change for SPHS</b> | <b>6. Other</b> |
| Steenhuis S, Struijs J, Koolman X, Ket J, E VDH. 2020. | 2020        | Global         | RA            |                                                            |                          | Discusses challenges in implementing and changing payment methods to address health system sustainability | "Our study shows that bundled payment contracts affect a broad range of health system actors, so their design and implementation should not be approached as merely the introduction of a new contracting model, but as part of a broader transformation to a more sustainable, value-based health care system. This approach should not focus on the volume and price of separate health care products but on the full care |                                                 |                 |

For peer review only



| <i>Article demographics</i> |      |                |        | <i>Reason for article inclusion and summary of results</i> |                   |                                                                                                                                                                                                              |                                                                                                                 |                                                                                                                                                                                                                                                                                |          |
|-----------------------------|------|----------------|--------|------------------------------------------------------------|-------------------|--------------------------------------------------------------------------------------------------------------------------------------------------------------------------------------------------------------|-----------------------------------------------------------------------------------------------------------------|--------------------------------------------------------------------------------------------------------------------------------------------------------------------------------------------------------------------------------------------------------------------------------|----------|
| Reference                   | Year | Country        | Type * | 1. Definition of SPHS                                      | 2. Measuring SPHS | 3. Challenges to SPHS                                                                                                                                                                                        | 4. Improvements to SPHS                                                                                         | 5. Sustaining or scaling change for SPHS                                                                                                                                                                                                                                       | 6. Other |
|                             |      |                |        |                                                            |                   |                                                                                                                                                                                                              | cycle of patients and the integral costs and outcomes associated with it"                                       |                                                                                                                                                                                                                                                                                |          |
| Nikolić B. 2020.            | 2020 | European Union | ED     |                                                            |                   | Discusses the fiscal sustainability of health systems, how spending has outpaced GDP and uses Baumols theory and the human factor in healthcare (that much of it cannot be automated) causing costs to rise. | This paper focuses on market competition and competition law between providers and how this could improve costs | This paper discusses how healthcare providers can be considered undertakings through international case law and through guidelines e.g., separation of each activity performed, separation of management activities and calculate the economic nature of each of service item. |          |

1  
2  
3  
4  
5  
6  
7  
8  
9  
10  
11  
12  
13  
14  
15  
16  
17  
18  
19  
20  
21  
22  
23  
24  
25  
26  
27  
28  
29  
30  
31  
32  
33  
34  
35  
36  
37  
38  
39  
40  
41  
42  
43  
44  
45  
46  
47

| <i>Article demographics</i> |             |                |               | <i>Reason for article inclusion and summary of results</i> |                          |                                                                                                                                                                                                                   |                                                                                                                                                                                                                                                                                                                                                                                                      |                                                 |                 |
|-----------------------------|-------------|----------------|---------------|------------------------------------------------------------|--------------------------|-------------------------------------------------------------------------------------------------------------------------------------------------------------------------------------------------------------------|------------------------------------------------------------------------------------------------------------------------------------------------------------------------------------------------------------------------------------------------------------------------------------------------------------------------------------------------------------------------------------------------------|-------------------------------------------------|-----------------|
| <b>Reference</b>            | <b>Year</b> | <b>Country</b> | <b>Type *</b> | <b>1. Definition of SPHS</b>                               | <b>2. Measuring SPHS</b> | <b>3. Challenges to SPHS</b>                                                                                                                                                                                      | <b>4. Improvements to SPHS</b>                                                                                                                                                                                                                                                                                                                                                                       | <b>5. Sustaining or scaling change for SPHS</b> | <b>6. Other</b> |
| Niraula S. 2019             | 2019        | Canada         | ED            |                                                            |                          | Discusses how cancer medication funding is at odds, and needs to be balanced against, the fiscal sustainability of the healthcare system in Canada. A challenge in this sector is that cancer drugs are expensive | To address the high cost and maintain fiscal sustainability the authors suggest to: improve collaborations and decrease duplication of efforts in R&D, minimise the conflicts of interest among members, involve citizens into decision making process, reconsider the funding model to an outcomes based funding model, incentivise cheaper alternatives (generic drugs) and penalise branded ones. |                                                 |                 |

| <i>Article demographics</i> |      |                  |           | <i>Reason for article inclusion and summary of results</i>                                                                                                                                                                                                                |                   |                                                                                                                                           |                         |                                          |          |
|-----------------------------|------|------------------|-----------|---------------------------------------------------------------------------------------------------------------------------------------------------------------------------------------------------------------------------------------------------------------------------|-------------------|-------------------------------------------------------------------------------------------------------------------------------------------|-------------------------|------------------------------------------|----------|
| Reference                   | Year | Country          | Type *    | 1. Definition of SPHS                                                                                                                                                                                                                                                     | 2. Measuring SPHS | 3. Challenges to SPHS                                                                                                                     | 4. Improvements to SPHS | 5. Sustaining or scaling change for SPHS | 6. Other |
| Pereno A, Eriksson D. 2020. | 2020 | Nordic Countries | EM and RA | “In spite of the different ways to define sustainable healthcare systems, and regardless of whether the three-pillar model or the integrated understanding of sustainability is applied, all approaches seem to have in common that a comprehensive approach with a long- |                   | In the introduction the paper mentions rising costs, chronic disease, societal pressure such as informed and sometimes demanding patients |                         |                                          |          |

1  
2  
3  
4  
5  
6  
7  
8  
9  
10  
11  
12  
13  
14  
15  
16  
17  
18  
19  
20  
21  
22  
23  
24  
25  
26  
27  
28  
29  
30  
31  
32  
33  
34  
35  
36  
37  
38  
39  
40  
41  
42  
43  
44  
45  
46  
47

| <i>Article demographics</i>              |             |                |               | <i>Reason for article inclusion and summary of results</i>                                                                                         |                                                                                          |                              |                                                                                                                                                                                    |                                                                        |                 |
|------------------------------------------|-------------|----------------|---------------|----------------------------------------------------------------------------------------------------------------------------------------------------|------------------------------------------------------------------------------------------|------------------------------|------------------------------------------------------------------------------------------------------------------------------------------------------------------------------------|------------------------------------------------------------------------|-----------------|
| <b>Reference</b>                         | <b>Year</b> | <b>Country</b> | <b>Type *</b> | <b>1. Definition of SPHS</b>                                                                                                                       | <b>2. Measuring SPHS</b>                                                                 | <b>3. Challenges to SPHS</b> | <b>4. Improvements to SPHS</b>                                                                                                                                                     | <b>5. Sustaining or scaling change for SPHS</b>                        | <b>6. Other</b> |
|                                          |             |                |               | term focus and a need to balance economic, social, and ecological interests needs to be used in the discussion of sustainable healthcare systems.” |                                                                                          |                              |                                                                                                                                                                                    |                                                                        |                 |
| Bogaert P, van Oers H, Van Oyen H. 2018. | 2018        | European Union | EM and RA     |                                                                                                                                                    | By developing a sustainable health information infrastructure for monitoring performance |                              | A unified information system with clear governance, central coordination and distributed implementation across EU countries will support system performance - provide unified data | Vague - it talks mainly about the structure of the information systems |                 |

| <i>Article demographics</i>                     |      |         |        | <i>Reason for article inclusion and summary of results</i> |                   |                                                                                                                                                                                                                                                                                                                                                          |                                                                                                          |                                          |          |
|-------------------------------------------------|------|---------|--------|------------------------------------------------------------|-------------------|----------------------------------------------------------------------------------------------------------------------------------------------------------------------------------------------------------------------------------------------------------------------------------------------------------------------------------------------------------|----------------------------------------------------------------------------------------------------------|------------------------------------------|----------|
| Reference                                       | Year | Country | Type * | 1. Definition of SPHS                                      | 2. Measuring SPHS | 3. Challenges to SPHS                                                                                                                                                                                                                                                                                                                                    | 4. Improvements to SPHS                                                                                  | 5. Sustaining or scaling change for SPHS | 6. Other |
| Wurcel V, Cicchetti A, Garrison L, et al. 2019. | 2019 | Global  | ED     |                                                            |                   | financial implications of value of diagnostic information (VODI), including supporting cost containment, allowing timely interventions and preventing disease progression and long-term cost. This requires rapid technological pathology testing and turnaround times to allow rapid clinical decisions (e.g., point-of-care testing, e-health records) | the need to identify and leverage the benefits of the value of diagnostic information for health systems |                                          |          |

1  
2  
3  
4  
5  
6  
7  
8  
9  
10  
11  
12  
13  
14  
15  
16  
17  
18  
19  
20  
21  
22  
23  
24  
25  
26  
27  
28  
29  
30  
31  
32  
33  
34  
35  
36  
37  
38  
39  
40  
41  
42  
43  
44  
45  
46  
47

| <i>Article demographics</i>                                      |             |                |               | <i>Reason for article inclusion and summary of results</i>       |                            |                                                                                                                 |                                                                                                                                                 |                                                                                                                                           |                 |
|------------------------------------------------------------------|-------------|----------------|---------------|------------------------------------------------------------------|----------------------------|-----------------------------------------------------------------------------------------------------------------|-------------------------------------------------------------------------------------------------------------------------------------------------|-------------------------------------------------------------------------------------------------------------------------------------------|-----------------|
| <b>Reference</b>                                                 | <b>Year</b> | <b>Country</b> | <b>Type *</b> | <b>1. Definition of SPHS</b>                                     | <b>2. Measuring SPHS</b>   | <b>3. Challenges to SPHS</b>                                                                                    | <b>4. Improvements to SPHS</b>                                                                                                                  | <b>5. Sustaining or scaling change for SPHS</b>                                                                                           | <b>6. Other</b> |
| Cunningham FC, Ranmuthugala G, Westbrook JI, Braithwaite J. 2019 | 2019        | Australia      | ED            |                                                                  | Via the framework/network. |                                                                                                                 |                                                                                                                                                 |                                                                                                                                           |                 |
| Embi PJ, Richesson R, Tenenbaum J, et al. 2019                   | 2019        | USA            | ED            | Learning health system                                           |                            |                                                                                                                 | the research results should extend far beyond the awardees who conduct the research, and there should be collaboration between funding agencies | that federal funding agencies should see investment in an initiative as an ongoing strategic investment rather than a time-limited option |                 |
| Enticott J, Braaf S, Johnson A, Jones A, Teede HJ. 2020.         | 2020        | Australia      | EM            | Links to a learning health system relying on continuous learning |                            | challenge of engaging multiple stakeholders in governance, research and within the health system itself; having | creating a vibrant learning culture with top down and bottom-up support; clinician engagement and inclusion; transparency around patient        | importance of consistent investment/funding overtime                                                                                      |                 |

| <i>Article demographics</i> |      |                            |        | <i>Reason for article inclusion and summary of results</i>                                                                                 |                   |                                                                                                                                           |                                                                                                                                      |                                                             |          |
|-----------------------------|------|----------------------------|--------|--------------------------------------------------------------------------------------------------------------------------------------------|-------------------|-------------------------------------------------------------------------------------------------------------------------------------------|--------------------------------------------------------------------------------------------------------------------------------------|-------------------------------------------------------------|----------|
| Reference                   | Year | Country                    | Type * | 1. Definition of SPHS                                                                                                                      | 2. Measuring SPHS | 3. Challenges to SPHS                                                                                                                     | 4. Improvements to SPHS                                                                                                              | 5. Sustaining or scaling change for SPHS                    | 6. Other |
|                             |      |                            |        |                                                                                                                                            |                   | leadership with focus, vision and engagement; skilled workforce and capacity building; data access and sharing/collaborating with consent | data use and research                                                                                                                |                                                             |          |
| Park YL, Canaway R. 2019.   | 2019 | WHO Western Pacific Region | ED     | "Healthcare system sustainability and resilience relate to preparedness and capacity to cope in the face of disease outbreak or disaster." |                   |                                                                                                                                           | Move towards universal healthcare which will enable "quality; efficiency; equity; accountability; and sustainability and resilience" | Well-established care<br><br>Utilising traditional medicine |          |

1  
2  
3  
4  
5  
6  
7  
8  
9  
10  
11  
12  
13  
14  
15  
16  
17  
18  
19  
20  
21  
22  
23  
24  
25  
26  
27  
28  
29  
30  
31  
32  
33  
34  
35  
36  
37  
38  
39  
40  
41  
42  
43  
44  
45  
46  
47

| <i>Article demographics</i>                    |             |                |               | <i>Reason for article inclusion and summary of results</i> |                          |                                                                                                                                                                                                                                                                                                                                         |                                                                                                                                                                                                                                                                                                                                                          |                                                 |                 |
|------------------------------------------------|-------------|----------------|---------------|------------------------------------------------------------|--------------------------|-----------------------------------------------------------------------------------------------------------------------------------------------------------------------------------------------------------------------------------------------------------------------------------------------------------------------------------------|----------------------------------------------------------------------------------------------------------------------------------------------------------------------------------------------------------------------------------------------------------------------------------------------------------------------------------------------------------|-------------------------------------------------|-----------------|
| <b>Reference</b>                               | <b>Year</b> | <b>Country</b> | <b>Type *</b> | <b>1. Definition of SPHS</b>                               | <b>2. Measuring SPHS</b> | <b>3. Challenges to SPHS</b>                                                                                                                                                                                                                                                                                                            | <b>4. Improvements to SPHS</b>                                                                                                                                                                                                                                                                                                                           | <b>5. Sustaining or scaling change for SPHS</b> | <b>6. Other</b> |
| Quaglio G, Figueras J, Mantoan D, et al. 2018. | 2018        | Italy/ Belgium | ED            |                                                            |                          | Y "Over the last 2 decades, health systems in the European Union (EU) are being questioned over their effectiveness and sustainability. In pursuing both goals, they have to conciliate coexisting, not always aligned, realities. For example, (i) an epidemiological transition where chronic conditions and complex patients require | Y - "(i) community participation is a key principle of health promotion practices, stemming from an ideological position that shifts from a bio-medical paradigm towards a social model that creates conditions where people are active participants in their own healthcare;16 (ii) strengthening primary care is one of the major challenges facing EU |                                                 |                 |

For peer review only



| <i>Article demographics</i> |      |         |        | <i>Reason for article inclusion and summary of results</i> |                   |                                                                                                                                                                                                                                                                                                                                                           |                                                                                                                                                                                                                                                                                                                                                                                                 |                                          |          |
|-----------------------------|------|---------|--------|------------------------------------------------------------|-------------------|-----------------------------------------------------------------------------------------------------------------------------------------------------------------------------------------------------------------------------------------------------------------------------------------------------------------------------------------------------------|-------------------------------------------------------------------------------------------------------------------------------------------------------------------------------------------------------------------------------------------------------------------------------------------------------------------------------------------------------------------------------------------------|------------------------------------------|----------|
| Reference                   | Year | Country | Type * | 1. Definition of SPHS                                      | 2. Measuring SPHS | 3. Challenges to SPHS                                                                                                                                                                                                                                                                                                                                     | 4. Improvements to SPHS                                                                                                                                                                                                                                                                                                                                                                         | 5. Sustaining or scaling change for SPHS | 6. Other |
|                             |      |         |        |                                                            |                   | integrated services pivoting around primary care, that contrasts with the prevalence of specialized, rather fragmented care, mainly provided by hospitals;1,2 (ii) a pervasive idea that more care is always better than less care, when there is a widespread evidence of inappropriate use of treatments and technologies;3 (iii) the rising promise of | healthcare systems as they reduce fragmentation in care provision. Decision makers are searching for models that are able to increase the whole pathway of care: primary, secondary and tertiary, long-term care and eventually social care;17 (iii) threats to good governance—lack of appropriate competences, the existence of conflicts of interest, bureaucratic rigidity—translate into a |                                          |          |

1  
2  
3  
4  
5  
6  
7  
8  
9  
10  
11  
12  
13  
14  
15  
16  
17  
18  
19  
20  
21  
22  
23  
24  
25  
26  
27  
28  
29  
30  
31  
32  
33  
34  
35  
36  
37  
38  
39  
40  
41  
42  
43  
44  
45  
46  
47

| <i>Article demographics</i> |             |                |               | <i>Reason for article inclusion and summary of results</i> |                          |                                                                                                                                                                                                                                                                                                                                                              |                                                                                                                                                                                                                                                                                                                                                                                                |                                                 |                 |
|-----------------------------|-------------|----------------|---------------|------------------------------------------------------------|--------------------------|--------------------------------------------------------------------------------------------------------------------------------------------------------------------------------------------------------------------------------------------------------------------------------------------------------------------------------------------------------------|------------------------------------------------------------------------------------------------------------------------------------------------------------------------------------------------------------------------------------------------------------------------------------------------------------------------------------------------------------------------------------------------|-------------------------------------------------|-----------------|
| <b>Reference</b>            | <b>Year</b> | <b>Country</b> | <b>Type *</b> | <b>1. Definition of SPHS</b>                               | <b>2. Measuring SPHS</b> | <b>3. Challenges to SPHS</b>                                                                                                                                                                                                                                                                                                                                 | <b>4. Improvements to SPHS</b>                                                                                                                                                                                                                                                                                                                                                                 | <b>5. Sustaining or scaling change for SPHS</b> | <b>6. Other</b> |
|                             |             |                |               |                                                            |                          | personalized medicine, that eclipses the efforts in promoting healthy lifestyles; <sup>4</sup> or (iv) the increasing demand of information and transparency with respect to services' quality and safety, that contrasts with serious flaws in the good governance of health services. <sup>5</sup> Underlying these challenges is a profound transition in | lack of transparency, poorly thought-out policies and the prevailing use of the 'low-hanging fruit' strategy; <sup>18</sup> and (iv) finally, the generation and reuse of health data (administrative, clinical, environmental, etc.) are essential in embracing the change in the knowledge paradigm towards learning health systems and subsequently toward more sustainable health systems" |                                                 |                 |

For peer review only

| <i>Article demographics</i>                          |      |         |        | <i>Reason for article inclusion and summary of results</i> |                   |                                                                                                                                             |                                                                                                |                                                                                                                             |          |
|------------------------------------------------------|------|---------|--------|------------------------------------------------------------|-------------------|---------------------------------------------------------------------------------------------------------------------------------------------|------------------------------------------------------------------------------------------------|-----------------------------------------------------------------------------------------------------------------------------|----------|
| Reference                                            | Year | Country | Type * | 1. Definition of SPHS                                      | 2. Measuring SPHS | 3. Challenges to SPHS                                                                                                                       | 4. Improvements to SPHS                                                                        | 5. Sustaining or scaling change for SPHS                                                                                    | 6. Other |
|                                                      |      |         |        |                                                            |                   | the medical knowledge paradigm, from the traditional and prevailing heuristic approach to the development of data-driven learning systems." |                                                                                                |                                                                                                                             |          |
| Kilbourne AM, Braganza MZ, Bowersox NW, et al. 2019. | 2019 | USA     | EM     |                                                            |                   | Funding, lack of incentives for researchers to apply their research into practice                                                           |                                                                                                | Discusses how the learning health system may contribute to incremental change and enhancement of health system performance. |          |
| Lehoux P, Roncarolo F, Silva HP, Boivin A, Denis JL, | 2019 | Global  | RA     |                                                            |                   | "Since the late 1980s, new health technologies not only                                                                                     | Successful health systems are characterized by healthy people, superior care and fairness. The |                                                                                                                             |          |

1  
2  
3  
4  
5  
6  
7  
8  
9  
10  
11  
12  
13  
14  
15  
16  
17  
18  
19  
20  
21  
22  
23  
24  
25  
26  
27  
28  
29  
30  
31  
32  
33  
34  
35  
36  
37  
38  
39  
40  
41  
42  
43  
44  
45  
46  
47

| <i>Article demographics</i>                                   |             |                |               | <i>Reason for article inclusion and summary of results</i>                                      |                          |                                                                                                                                     |                                                                                                                                                                                                                                                                          |                                                 |                 |
|---------------------------------------------------------------|-------------|----------------|---------------|-------------------------------------------------------------------------------------------------|--------------------------|-------------------------------------------------------------------------------------------------------------------------------------|--------------------------------------------------------------------------------------------------------------------------------------------------------------------------------------------------------------------------------------------------------------------------|-------------------------------------------------|-----------------|
| <b>Reference</b>                                              | <b>Year</b> | <b>Country</b> | <b>Type *</b> | <b>1. Definition of SPHS</b>                                                                    | <b>2. Measuring SPHS</b> | <b>3. Challenges to SPHS</b>                                                                                                        | <b>4. Improvements to SPHS</b>                                                                                                                                                                                                                                           | <b>5. Sustaining or scaling change for SPHS</b> | <b>6. Other</b> |
| Hebert R. 2019.                                               |             |                |               |                                                                                                 |                          | increased global inequalities, but they also undermined the sustainability of health systems in rich and poor countries alike.<br>" | researchers write that "over the next decades it will be imperative to implement policy mechanisms that can support the development, financing and use of innovations that do not compromise but rather contribute to the success and sustainability of health systems." |                                                 |                 |
| Editorial. Healthcar e quarterly (Toronto, Ont.). 2020;22(4 ) | 2020        | Canada         | ED            | Health systems need the right distribution of educated health professional s who have the right | Yes                      | Yes                                                                                                                                 | Yes                                                                                                                                                                                                                                                                      | Yes                                             |                 |

1  
2  
3  
4  
5  
6  
7  
8  
9  
10  
11  
12  
13  
14  
15  
16  
17  
18  
19  
20  
21  
22  
23  
24  
25  
26  
27  
28  
29  
30  
31  
32  
33  
34  
35  
36  
37  
38  
39  
40  
41  
42  
43  
44  
45  
46  
47

| <i>Article demographics</i> |             |                |               | <i>Reason for article inclusion and summary of results</i>                                                                                                                                                                                                                              |                          |                              |                                |                                                 |                 |
|-----------------------------|-------------|----------------|---------------|-----------------------------------------------------------------------------------------------------------------------------------------------------------------------------------------------------------------------------------------------------------------------------------------|--------------------------|------------------------------|--------------------------------|-------------------------------------------------|-----------------|
| <b>Reference</b>            | <b>Year</b> | <b>Country</b> | <b>Type *</b> | <b>1. Definition of SPHS</b>                                                                                                                                                                                                                                                            | <b>2. Measuring SPHS</b> | <b>3. Challenges to SPHS</b> | <b>4. Improvements to SPHS</b> | <b>5. Sustaining or scaling change for SPHS</b> | <b>6. Other</b> |
|                             |             |                |               | training and mindset; the skills and support to build effective teams and visionary leaders who co-create compassionate cultures and inclusive partnerships that foster integrated patient-centred care; and the right resources, processes, and tools to deliver solutions for current |                          |                              |                                |                                                 |                 |

1  
2  
3  
4  
5  
6  
7  
8  
9  
10  
11  
12  
13  
14  
15  
16  
17  
18  
19  
20  
21  
22  
23  
24  
25  
26  
27  
28  
29  
30  
31  
32  
33  
34  
35  
36  
37  
38  
39  
40  
41  
42  
43  
44  
45  
46  
47

| <i>Article demographics</i>                                                                                                                                                                              |             |                |               | <i>Reason for article inclusion and summary of results</i> |                                                                                                               |                                                                                                                                                                                                                                                             |                                |                                                 |                 |
|----------------------------------------------------------------------------------------------------------------------------------------------------------------------------------------------------------|-------------|----------------|---------------|------------------------------------------------------------|---------------------------------------------------------------------------------------------------------------|-------------------------------------------------------------------------------------------------------------------------------------------------------------------------------------------------------------------------------------------------------------|--------------------------------|-------------------------------------------------|-----------------|
| <b>Reference</b>                                                                                                                                                                                         | <b>Year</b> | <b>Country</b> | <b>Type *</b> | <b>1. Definition of SPHS</b>                               | <b>2. Measuring SPHS</b>                                                                                      | <b>3. Challenges to SPHS</b>                                                                                                                                                                                                                                | <b>4. Improvements to SPHS</b> | <b>5. Sustaining or scaling change for SPHS</b> | <b>6. Other</b> |
|                                                                                                                                                                                                          |             |                |               | and future demands.                                        |                                                                                                               |                                                                                                                                                                                                                                                             |                                |                                                 |                 |
| Measuring universal health coverage based on an index of effective coverage of health services in 204 countries and territories, 1990-2019: a systematic analysis for the Global Burden of Disease Study | 2020        | Global         | EM            |                                                            | Measures of UHC; UHC viewed as way of achieving health system sustainability and sustainable health outcomes. | Talks about challenges in achieving UHC- especially for low-income countries - identifies per-capita spending to be able to reach 90% UHC as \$2538...Also identifies USA as outlier - achieves only 82% overall coverage despite spending ~8500 per capita |                                |                                                 |                 |

| <i>Article demographics</i>                                        |      |         |         | <i>Reason for article inclusion and summary of results</i>                                               |                                                                                                                                          |                                                                                                                                                                   |                         |                                          |          |
|--------------------------------------------------------------------|------|---------|---------|----------------------------------------------------------------------------------------------------------|------------------------------------------------------------------------------------------------------------------------------------------|-------------------------------------------------------------------------------------------------------------------------------------------------------------------|-------------------------|------------------------------------------|----------|
| Reference                                                          | Year | Country | Type *  | 1. Definition of SPHS                                                                                    | 2. Measuring SPHS                                                                                                                        | 3. Challenges to SPHS                                                                                                                                             | 4. Improvements to SPHS | 5. Sustaining or scaling change for SPHS | 6. Other |
| 2019.<br>Lancet<br>(London,                                        |      |         |         |                                                                                                          |                                                                                                                                          |                                                                                                                                                                   |                         |                                          |          |
| Abimbola S,<br>Baatiema L, Bigdeli M. 2019.                        | 2019 | Global  | RA      | Talks about resilient structures and Financing models                                                    |                                                                                                                                          | Talks about the challenges of decentralisation - i.e., Decentralised governance and financing to jurisdictions and the impacts of this model. Australian specific |                         |                                          |          |
| Barbazza E,<br>Kringos D, Kruse I,<br>Klazinga NS, Tello JE. 2019. | 2019 | Global  | EM & RA | Provides a definition of a sustainable primary care system that is linked with the broader health system | Provides a framework “The resulting framework applies a performance continuum in the classical approach of structures-processes-outcomes | Lack of standardised data collection; poor linkage of primary care with broader system                                                                            |                         |                                          |          |

1  
2  
3  
4  
5  
6  
7  
8  
9  
10  
11  
12  
13  
14  
15  
16  
17  
18  
19  
20  
21  
22  
23  
24  
25  
26  
27  
28  
29  
30  
31  
32  
33  
34  
35  
36  
37  
38  
39  
40  
41  
42  
43  
44  
45  
46  
47

| <i>Article demographics</i> |             |                |               | <i>Reason for article inclusion and summary of results</i> |                                                                                                                                                                                                                                       |                                  |                                |                                                 |                 |
|-----------------------------|-------------|----------------|---------------|------------------------------------------------------------|---------------------------------------------------------------------------------------------------------------------------------------------------------------------------------------------------------------------------------------|----------------------------------|--------------------------------|-------------------------------------------------|-----------------|
| <b>Reference</b>            | <b>Year</b> | <b>Country</b> | <b>Type *</b> | <b>1. Definition of SPHS</b>                               | <b>2. Measuring SPHS</b>                                                                                                                                                                                                              | <b>3. Challenges to SPHS</b>     | <b>4. Improvements to SPHS</b> | <b>5. Sustaining or scaling change for SPHS</b> | <b>6. Other</b> |
|                             |             |                |               |                                                            | spanning 6 domains – primary care structures, model of primary care, care contact, primary care outputs, health system outcomes, and health outcomes – that are further classified by 26 subdomains and 63 features of primary care." |                                  |                                |                                                 |                 |
| Craig N, Robinson M. 2019.  | 2019        | Scotland       | ED            | Yes                                                        |                                                                                                                                                                                                                                       | Yes                              |                                | Yes                                             |                 |
| Costa-Font J,               | 2020        | Global         | ED            | This perspective paper                                     | Mainly in terms of                                                                                                                                                                                                                    | Focuses on ageing and increasing | Prevention                     | Yes                                             |                 |



| <i>Article demographics</i> |      |         |        | <i>Reason for article inclusion and summary of results</i>                                                                                                                                                                                                |                   |                                                                                                                  |                         |                                          |          |
|-----------------------------|------|---------|--------|-----------------------------------------------------------------------------------------------------------------------------------------------------------------------------------------------------------------------------------------------------------|-------------------|------------------------------------------------------------------------------------------------------------------|-------------------------|------------------------------------------|----------|
| Reference                   | Year | Country | Type * | 1. Definition of SPHS                                                                                                                                                                                                                                     | 2. Measuring SPHS | 3. Challenges to SPHS                                                                                            | 4. Improvements to SPHS | 5. Sustaining or scaling change for SPHS | 6. Other |
| Levaggi R. 2020.            |      |         |        | argues that a sustainable health system design encompasses identifying opportunities and incentives for innovation, alongside an analysis of its effect on expenditure. Although aging alone is not a powerful cost driver, the combined effect of costly | economic outcomes | demands for new medical technologies including new treatments but talks about the potential impact of prevention |                         |                                          |          |

1  
2  
3  
4  
5  
6  
7  
8  
9  
10  
11  
12  
13  
14  
15  
16  
17  
18  
19  
20  
21  
22  
23  
24  
25  
26  
27  
28  
29  
30  
31  
32  
33  
34  
35  
36  
37  
38  
39  
40  
41  
42  
43  
44  
45  
46  
47

| <i>Article demographics</i> |             |                |               | <i>Reason for article inclusion and summary of results</i>                                                                                                                                                                                                         |                          |                              |                                |                                                 |                 |
|-----------------------------|-------------|----------------|---------------|--------------------------------------------------------------------------------------------------------------------------------------------------------------------------------------------------------------------------------------------------------------------|--------------------------|------------------------------|--------------------------------|-------------------------------------------------|-----------------|
| <b>Reference</b>            | <b>Year</b> | <b>Country</b> | <b>Type *</b> | <b>1. Definition of SPHS</b>                                                                                                                                                                                                                                       | <b>2. Measuring SPHS</b> | <b>3. Challenges to SPHS</b> | <b>4. Improvements to SPHS</b> | <b>5. Sustaining or scaling change for SPHS</b> | <b>6. Other</b> |
|                             |             |                |               | innovation, personalized care, and the rise of chronic conditions is. We identify an increasing role of prevention, the reduction of the prevalence of chronic conditions, re-organisation of incentives in healthcare markets, including a closer scrutiny of the |                          |                              |                                |                                                 |                 |

For peer review only

| <i>Article demographics</i>                                                              |      |         |        | <i>Reason for article inclusion and summary of results</i> |                                                                                                                                                              |                                                                                                                                                                                                                                                                                                                        |                                                                                                                                                                                            |                                                                                                                                                                                                                                                                                                                                        |          |
|------------------------------------------------------------------------------------------|------|---------|--------|------------------------------------------------------------|--------------------------------------------------------------------------------------------------------------------------------------------------------------|------------------------------------------------------------------------------------------------------------------------------------------------------------------------------------------------------------------------------------------------------------------------------------------------------------------------|--------------------------------------------------------------------------------------------------------------------------------------------------------------------------------------------|----------------------------------------------------------------------------------------------------------------------------------------------------------------------------------------------------------------------------------------------------------------------------------------------------------------------------------------|----------|
| Reference                                                                                | Year | Country | Type * | 1. Definition of SPHS                                      | 2. Measuring SPHS                                                                                                                                            | 3. Challenges to SPHS                                                                                                                                                                                                                                                                                                  | 4. Improvements to SPHS                                                                                                                                                                    | 5. Sustaining or scaling change for SPHS                                                                                                                                                                                                                                                                                               | 6. Other |
|                                                                                          |      |         |        | appropriateness of new treatments                          |                                                                                                                                                              |                                                                                                                                                                                                                                                                                                                        |                                                                                                                                                                                            |                                                                                                                                                                                                                                                                                                                                        |          |
| Derakhshani N, Doshman gir L, Ahmadi A, Fakhri A, Sadeghi-Bazargani H, Gordeev VS. 2020. | 2020 | Global  | RA     | UHC is implied to be a sustainable health system           | Focussed on UHC as a goal for sustainability ; uses a framework and several dimensions... Talks about determinants, barriers and enablers of sustainable UHC | Service delivery (dimension 5) is another dimension of the suggested tool with four axes: basic benefits package, geographical access, quality of care, and human resources for health. In regards to the benefits package axes, developing an affordable, sustainable, and equitable basic package of healthcare that | Yes - talks about culture, integration, seamless care. Diffusion of Excellence practices in making a difference every day for veterans, this article highlights 4 different practice areas | Yes - Social infrastructure and social sustainability (dimensions 1–2) seem to be influential factors in progress towards UHC: society literacy, community income, poverty, age group, and population. <sup>54</sup> To reach social sustainability and providing social infrastructure, as well as providing sustainable development, |          |

1  
2  
3  
4  
5  
6  
7  
8  
9  
10  
11  
12  
13  
14  
15  
16  
17  
18  
19  
20  
21  
22  
23  
24  
25  
26  
27  
28  
29  
30  
31  
32  
33  
34  
35  
36  
37  
38  
39  
40  
41  
42  
43  
44  
45  
46  
47

| <i>Article demographics</i> |             |                |               | <i>Reason for article inclusion and summary of results</i> |                                                            |                                                    |                                                                                                      |                                                                                                                                                                                                                                                                        |                 |
|-----------------------------|-------------|----------------|---------------|------------------------------------------------------------|------------------------------------------------------------|----------------------------------------------------|------------------------------------------------------------------------------------------------------|------------------------------------------------------------------------------------------------------------------------------------------------------------------------------------------------------------------------------------------------------------------------|-----------------|
| <b>Reference</b>            | <b>Year</b> | <b>Country</b> | <b>Type *</b> | <b>1. Definition of SPHS</b>                               | <b>2. Measuring SPHS</b>                                   | <b>3. Challenges to SPHS</b>                       | <b>4. Improvements to SPHS</b>                                                                       | <b>5. Sustaining or scaling change for SPHS</b>                                                                                                                                                                                                                        | <b>6. Other</b> |
|                             |             |                |               |                                                            |                                                            | can serve various population needs is a challenge. |                                                                                                      | political will and determination, technical skills, expertise, and administrative cooperation are required. Political commitment can be a pivotal issue in progress to achieve UHC. Socio-political and economic sustainability essential to support a sustainable UHC |                 |
| Clancy C. 2019.             | 2019        | USA            | ED            | Not as such... indirect                                    | talks about data to support innovation and measure success |                                                    | Yes - talks about culture, integration, seamless care. Diffusion of Excellence practices in making a | large national network providing care to 9 million veterans; Importance of systems and data. The next                                                                                                                                                                  |                 |

| <i>Article demographics</i>          |             |                |               | <i>Reason for article inclusion and summary of results</i>   |                          |                              |                                                                                                                                                                                                                                   |                                                                                                                                                                                                                                                                                                                                       |                 |
|--------------------------------------|-------------|----------------|---------------|--------------------------------------------------------------|--------------------------|------------------------------|-----------------------------------------------------------------------------------------------------------------------------------------------------------------------------------------------------------------------------------|---------------------------------------------------------------------------------------------------------------------------------------------------------------------------------------------------------------------------------------------------------------------------------------------------------------------------------------|-----------------|
| <b>Reference</b>                     | <b>Year</b> | <b>Country</b> | <b>Type *</b> | <b>1. Definition of SPHS</b>                                 | <b>2. Measuring SPHS</b> | <b>3. Challenges to SPHS</b> | <b>4. Improvements to SPHS</b>                                                                                                                                                                                                    | <b>5. Sustaining or scaling change for SPHS</b>                                                                                                                                                                                                                                                                                       | <b>6. Other</b> |
|                                      |             |                |               |                                                              |                          |                              | difference every day for veterans, this article highlights 4 different practice areas: 1) direct scheduling, 2) access to healthcare in rural areas, 3) access to mental healthcare, and 4) interactive and patient-centred care. | challenge, however, is elevating such lessons learned to transition the initiative from a nascent start-up to a sustainable part of VHA's culture. There are 3 primary components of the current transition plan: 1) cultivate the culture, 2) build partnerships and encourage collaboration, and 3) embrace appropriate technology. |                 |
| Marcotte LM, Moriates C, Wolfson DB, | 2020        | USA            | ED            | indirectly describes sustainability through high value care, |                          |                              | Yes - supporting professionalism is seen a more durable intervention rather than                                                                                                                                                  | "Medical professionalism is a strong, durable, intrinsic motivator for                                                                                                                                                                                                                                                                |                 |

For peer review only

1  
2  
3  
4  
5  
6  
7  
8  
9  
10  
11  
12  
13  
14  
15  
16  
17  
18  
19  
20  
21  
22  
23  
24  
25  
26  
27  
28  
29  
30  
31  
32  
33  
34  
35  
36  
37  
38  
39  
40  
41  
42  
43  
44  
45  
46  
47

1  
2  
3  
4  
5  
6  
7  
8  
9  
10  
11  
12  
13  
14  
15  
16  
17  
18  
19  
20  
21  
22  
23  
24  
25  
26  
27  
28  
29  
30  
31  
32  
33  
34  
35  
36  
37  
38  
39  
40  
41  
42  
43  
44  
45  
46  
47

| <i>Article demographics</i> |             |                |               | <i>Reason for article inclusion and summary of results</i>                                                                                                                                                                                                                                 |                          |                              |                                                                                                     |                                                                                                                                |                 |
|-----------------------------|-------------|----------------|---------------|--------------------------------------------------------------------------------------------------------------------------------------------------------------------------------------------------------------------------------------------------------------------------------------------|--------------------------|------------------------------|-----------------------------------------------------------------------------------------------------|--------------------------------------------------------------------------------------------------------------------------------|-----------------|
| <b>Reference</b>            | <b>Year</b> | <b>Country</b> | <b>Type *</b> | <b>1. Definition of SPHS</b>                                                                                                                                                                                                                                                               | <b>2. Measuring SPHS</b> | <b>3. Challenges to SPHS</b> | <b>4. Improvements to SPHS</b>                                                                      | <b>5. Sustaining or scaling change for SPHS</b>                                                                                | <b>6. Other</b> |
| Frankel RM. 2020.           |             |                |               | professionalism and education and appropriate incentives and remuneration; It talks about re-conceptualising high value in terms of "infusing" this concept as a principle for practice among all doctors in training... Providing high-value care as a competency for doctors in training |                          |                              | dealing with incentives for single aspects of practice. Linking professionalism with payment reform | improving value in healthcare delivery and should be employed to support training efforts, systems change and payment reform". |                 |

For peer review only

| <i>Article demographics</i>                     |      |         |        | <i>Reason for article inclusion and summary of results</i>                                                                                                                                                                                                                                                   |                   |                       |                         |                                          |          |
|-------------------------------------------------|------|---------|--------|--------------------------------------------------------------------------------------------------------------------------------------------------------------------------------------------------------------------------------------------------------------------------------------------------------------|-------------------|-----------------------|-------------------------|------------------------------------------|----------|
| Reference                                       | Year | Country | Type * | 1. Definition of SPHS                                                                                                                                                                                                                                                                                        | 2. Measuring SPHS | 3. Challenges to SPHS | 4. Improvements to SPHS | 5. Sustaining or scaling change for SPHS | 6. Other |
| Witter S, Palmer N, Balabano va D, et al. 2019. | 2019 | Global  | RA     | The term “HSS” first came from a recognition of the need to address the the distorting effects of increasing expenditure on vertical programmes targeted to address specific diseases and interventions (e.g., HIV/AIDS, polio) in the absence of support to broader systems, while recognising that without |                   |                       |                         |                                          |          |

1  
2  
3  
4  
5  
6  
7  
8  
9  
10  
11  
12  
13  
14  
15  
16  
17  
18  
19  
20  
21  
22  
23  
24  
25  
26  
27  
28  
29  
30  
31  
32  
33  
34  
35  
36  
37  
38  
39  
40  
41  
42  
43  
44  
45  
46  
47

| <i>Article demographics</i>   |             |                |               | <i>Reason for article inclusion and summary of results</i>                                           |                                                   |                              |                                                                                                                                                                                           |                                                 |                 |
|-------------------------------|-------------|----------------|---------------|------------------------------------------------------------------------------------------------------|---------------------------------------------------|------------------------------|-------------------------------------------------------------------------------------------------------------------------------------------------------------------------------------------|-------------------------------------------------|-----------------|
| <b>Reference</b>              | <b>Year</b> | <b>Country</b> | <b>Type *</b> | <b>1. Definition of SPHS</b>                                                                         | <b>2. Measuring SPHS</b>                          | <b>3. Challenges to SPHS</b> | <b>4. Improvements to SPHS</b>                                                                                                                                                            | <b>5. Sustaining or scaling change for SPHS</b> | <b>6. Other</b> |
|                               |             |                |               | strengthening of basic health systems, vertical programmes would be unlikely to deliver as expected. |                                                   |                              |                                                                                                                                                                                           |                                                 |                 |
| Sturmberg JP. 2018            | 2018        |                | ED            |                                                                                                      |                                                   |                              | Could work to improve the resilience of patients with multi-morbidities. This has been shown to help prevent overutilization on the health system, as well as improve the QOL of patients |                                                 |                 |
| Thistlethwaite JE, Dunston R, | 2019        | Australia      | ED            |                                                                                                      | Recognise that interprofessional health education |                              | The importance and shift of interprofessional education from an organisational                                                                                                            |                                                 |                 |



| <i>Article demographics</i>              |      |                |        | <i>Reason for article inclusion and summary of results</i> |                                                                                                                                                   |                                                                                                                                                                                             |                                                       |                                          |          |
|------------------------------------------|------|----------------|--------|------------------------------------------------------------|---------------------------------------------------------------------------------------------------------------------------------------------------|---------------------------------------------------------------------------------------------------------------------------------------------------------------------------------------------|-------------------------------------------------------|------------------------------------------|----------|
| Reference                                | Year | Country        | Type * | 1. Definition of SPHS                                      | 2. Measuring SPHS                                                                                                                                 | 3. Challenges to SPHS                                                                                                                                                                       | 4. Improvements to SPHS                               | 5. Sustaining or scaling change for SPHS | 6. Other |
| Yassine T. 2019.                         |      |                |        |                                                            | needs to be funded constantly (even if funding is relatively small) and that it needs to be able to be adapted to micro, meso and macro processes |                                                                                                                                                                                             | to a national level, and the role of national funding |                                          |          |
| Iskrov G, Stefanov R, Ferrelli RM. 2019. | 2019 | European Union | ED     |                                                            | Recognition that fiscal sustainability is important, and that achieving this means that more prevalent diseases get more funding                  | The challenge of making primary care accessible, affordable, and reducing unnecessary hospital admissions. Integrating the health workforce to the benefit of the patient. Anticipating for |                                                       |                                          |          |

| <i>Article demographics</i> |             |                |               | <i>Reason for article inclusion and summary of results</i> |                          |                                                                                                                                                 |                                |                                                 |                 |
|-----------------------------|-------------|----------------|---------------|------------------------------------------------------------|--------------------------|-------------------------------------------------------------------------------------------------------------------------------------------------|--------------------------------|-------------------------------------------------|-----------------|
| <b>Reference</b>            | <b>Year</b> | <b>Country</b> | <b>Type *</b> | <b>1. Definition of SPHS</b>                               | <b>2. Measuring SPHS</b> | <b>3. Challenges to SPHS</b>                                                                                                                    | <b>4. Improvements to SPHS</b> | <b>5. Sustaining or scaling change for SPHS</b> | <b>6. Other</b> |
|                             |             |                |               |                                                            |                          | changes in need and changing the health workforce accordingly. And that constant data collection and analysis could improve policy and practice |                                |                                                 |                 |

\*Note.  
 ED – editorial, opinion piece; RA – review article, EM – empirical article.

For peer review only

1  
2  
3  
4  
5  
6  
7  
8  
9  
10  
11  
12  
13  
14  
15  
16  
17  
18  
19  
20  
21  
22  
23  
24  
25  
26  
27  
28  
29  
30  
31  
32  
33  
34  
35  
36  
37  
38  
39  
40  
41  
42  
43  
44  
45  
46  
47

**HOW CAN THE HEALTHCARE SYSTEM DELIVER SUSTAINABLE PERFORMANCE?  
A SCOPING REVIEW**

**ADDITIONAL FILE 3: QUALITY ASSESSMENT**

**Hawker rating for included empirical articles**

| Reference                                                                                                         | Abstract and title | Introduction and aims | Method and data | Sampling | Data analysis | Ethics and bias | Finding and results | Transferability and generalisability | Implications and usefulness | Total (out of 36) |
|-------------------------------------------------------------------------------------------------------------------|--------------------|-----------------------|-----------------|----------|---------------|-----------------|---------------------|--------------------------------------|-----------------------------|-------------------|
| Ament SMC, Gillissen F, Moser A, Maessen JMC, Dirksen CD, von Meyenfeldt MF, et al. 2014                          | 4                  | 4                     | 4               | 3        | 4             | 4               | 4                   | 3                                    | 3                           | 33                |
| Bramesfeld, A., F. Amaddeo, J. Caldas-de-Almeida, G. Cardoso, A. Depaigne-Loth, R. Derenne, V. Donisi et al. 2016 | 4                  | 4                     | 3               | 3        | 4             | 1               | 4                   | 3                                    | 4                           | 30                |

1  
2  
3  
4  
5  
6  
7  
8  
9  
10  
11  
12  
13  
14  
15  
16  
17  
18  
19  
20  
21  
22  
23  
24  
25  
26  
27  
28  
29  
30  
31  
32  
33  
34  
35  
36  
37  
38  
39  
40  
41  
42  
43  
44  
45  
46  
47

| Reference                                                        | Abstract and title | Introduction and aims | Method and data | Sampling | Data analysis | Ethics and bias | Finding and results | Transferability and generalisability | Implications and usefulness | Total (out of 36) |
|------------------------------------------------------------------|--------------------|-----------------------|-----------------|----------|---------------|-----------------|---------------------|--------------------------------------|-----------------------------|-------------------|
| Buttigieg SC, Schuetz M, Bezzina F. 2016                         | 3                  | 3                     | 4               | 3        | 3             | 4               | 4                   | 3                                    | 4                           | 31                |
| Buykx P, Humphreys JS, Tham R, et al. 2012                       | 4                  | 4                     | 2               | 1        | 1             | 3               | 4                   | 2                                    | 4                           | 25                |
| Cho CC, Ramanan RA, Feldman MD. 2011                             | 4                  | 3                     | 4               | 4        | 4             | 1               | 4                   | 3                                    | 4                           | 31                |
| De Rosis S, Nuti S. 2018                                         | 3                  | 4                     | 4               | 3        | 4             | 1               | 4                   | 3                                    | 3                           | 29                |
| Dunn, P. M., B. B. Arnetz, J. F. Christensen, and L. Homer. 2007 | 3                  | 4                     | 4               | 4        | 4             | 1               | 4                   | 3                                    | 3                           | 30                |
| Ehrlich C, Kendall E. 2015                                       | 4                  | 3                     | 4               | 3        | 3             | 3               | 4                   | 3                                    | 3                           | 30                |
| Farmanova E, Kirvan C, Verma J, et al. 2016                      | 4                  | 3                     | 3               | 2        | 3             | 1               | 4                   | 2                                    | 4                           | 26                |
| Foo, C. Y., K. K. Lim, S. Sivasampu, K.                          | 4                  | 4                     | 3               | 2        | 4             | 2               | 4                   | 3                                    | 3                           | 29                |

| Reference                                                                                                                                                                                                                  | Abstract and title | Introduction and aims | Method and data | Sampling | Data analysis | Ethics and bias | Finding and results | Transferability and generalisability | Implications and usefulness | Total (out of 36) |
|----------------------------------------------------------------------------------------------------------------------------------------------------------------------------------------------------------------------------|--------------------|-----------------------|-----------------|----------|---------------|-----------------|---------------------|--------------------------------------|-----------------------------|-------------------|
| B. Dahian, and P. P. Goh. 2015                                                                                                                                                                                             |                    |                       |                 |          |               |                 |                     |                                      |                             |                   |
| Fox, L. A., K. E. Walsh, and E. G. Schinker. 2016                                                                                                                                                                          | 4                  | 4                     | 4               | 1        | 4             | 1               | 4                   | 2                                    | 3                           | 27                |
| Garde S, Hullin CM, Chen R, et al. 2007;129(Pt 2):1179-1183.                                                                                                                                                               | 3                  | 4                     | 3               | 4        | 4             | 1               | 3                   | 2                                    | 3                           | 27                |
| Global, regional, and national disability-adjusted life-years (DALYs) for 315 diseases and injuries and healthy life expectancy (HALE), 1990-2015: a systematic analysis for the Global Burden of Disease Study 2015. 2016 | 4                  | 4                     | 4               | 3        | 4             | 3               | 4                   | 4                                    | 4                           | 34                |

1  
2  
3  
4  
5  
6  
7  
8  
9  
10  
11  
12  
13  
14  
15  
16  
17  
18  
19  
20  
21  
22  
23  
24  
25  
26  
27  
28  
29  
30  
31  
32  
33  
34  
35  
36  
37  
38  
39  
40  
41  
42  
43  
44  
45  
46  
47

| Reference                                                                                                        | Abstract and title | Introduction and aims | Method and data | Sampling | Data analysis | Ethics and bias | Finding and results | Transferability and generalisability | Implications and usefulness | Total (out of 36) |
|------------------------------------------------------------------------------------------------------------------|--------------------|-----------------------|-----------------|----------|---------------|-----------------|---------------------|--------------------------------------|-----------------------------|-------------------|
| Heron, N. 2015.                                                                                                  | 3                  | 3                     | 4               | 4        | 4             | 1               | 4                   | 4                                    | 2                           | 29                |
| Hibbert PD, Thomas MJW, Deakin A, et al. 2018                                                                    | 4                  | 4                     | 3               | 3        | 4             | 3               | 4                   | 3                                    | 4                           | 32                |
| Kerr R, Hendrie DV. 2018                                                                                         | 4                  | 4                     | 4               | 3        | 4             | 3               | 4                   | 3                                    | 4                           | 33                |
| Levine, S., S. O'Mahony, A. Baron, A. Ansari, C. Deamant, J. Frader, I. Leyva, M. Marschke, and M. Preodor. 2017 | 4                  | 3                     | 4               | 3        | 4             | 1               | 4                   | 3                                    | 4                           | 30                |
| Lizarondo, L., C. Turnbull, T. Kroon, K. Grimmer, A. Bell, S. Kumar, M. McEvoy et al. 2016                       | 4                  | 4                     | 4               | 3        | 4             | 3               | 3                   | 3                                    | 4                           | 32                |
| McVeigh J, MacLachlan M, Gilmore B, et                                                                           | 4                  | 3                     | 3               | 3        | 4             | 4               | 4                   | 3                                    | 3                           | 31                |

| Reference                                                                                                                                              | Abstract and title | Introduction and aims | Method and data | Sampling | Data analysis | Ethics and bias | Finding and results | Transferability and generalisability | Implications and usefulness | Total (out of 36) |
|--------------------------------------------------------------------------------------------------------------------------------------------------------|--------------------|-----------------------|-----------------|----------|---------------|-----------------|---------------------|--------------------------------------|-----------------------------|-------------------|
| al.<br>2016;12(1):49.                                                                                                                                  |                    |                       |                 |          |               |                 |                     |                                      |                             |                   |
| McGrath, S. P.,<br>and G. T. Blike.<br>2015                                                                                                            | 4                  | 4                     | 4               | 3        | 3             | 1               | 4                   | 1                                    | 2                           | 26                |
| Molfenter, T.,<br>D. Gustafson,<br>C. Kilo, A.<br>Bhattacharya,<br>and J. Olsson.<br>2005                                                              | 2                  | 2                     | 4               | 2        | 4             | 3               | 3                   | 3                                    | 4                           | 27                |
| Rees, G. H.<br>2014                                                                                                                                    | 3                  | 4                     | 3               | 3        | 4             | 1               | 4                   | 3                                    | 4                           | 29                |
| Robertson J,<br>Walkom EJ,<br>Henry DA.<br>2011                                                                                                        | 4                  | 4                     | 4               | 3        | 4             | 4               | 4                   | 3                                    | 3                           | 33                |
| Scheirer MA. Is<br>sustainability<br>possible? A<br>review and<br>commentary on<br>empirical<br>studies of<br>program<br>sustainability.<br>Am J Eval. | 3                  | 2                     | 3               | 3        | 4             | 4               | 2                   | 2                                    | 4                           | 27                |

1  
2  
3  
4  
5  
6  
7  
8  
9  
10  
11  
12  
13  
14  
15  
16  
17  
18  
19  
20  
21  
22  
23  
24  
25  
26  
27  
28  
29  
30  
31  
32  
33  
34  
35  
36  
37  
38  
39  
40  
41  
42  
43  
44  
45  
46  
47

| Reference                                                                                           | Abstract and title | Introduction and aims | Method and data | Sampling | Data analysis | Ethics and bias | Finding and results | Transferability and generalisability | Implications and usefulness | Total (out of 36) |
|-----------------------------------------------------------------------------------------------------|--------------------|-----------------------|-----------------|----------|---------------|-----------------|---------------------|--------------------------------------|-----------------------------|-------------------|
| 2005;26(3):320-47.                                                                                  |                    |                       |                 |          |               |                 |                     |                                      |                             |                   |
| Schwann, N. M., K. A. Bretz, S. Eid, T. Burger, D. Fry, F. Ackler, P. Evans et al. 2011             | 4                  | 2                     | 4               | 2        | 4             | 3               | 3                   | 2                                    | 3                           | 27                |
| Shaw J, Wong I, Griffin B, Robertson M, Bhatia RS. 2017                                             | 3                  | 4                     | 4               | 2        | 4             | 1               | 4                   | 3                                    | 3                           | 28                |
| Solon, O., K. Woo, S. A. Quimbo, R. Shimkhada, J. Florentino, and J. W. Peabody. 2009               | 4                  | 4                     | 4               | 3        | 4             | 3               | 4                   | 3                                    | 4                           | 33                |
| Stockdale, S. E., J. Zuchowski, L. V. Rubenstein, N. Sapir, E. M. Yano, L. Altman, J. J. Fickel, S. | 4                  | 4                     | 4               | 3        | 4             | 1               | 4                   | 3                                    | 4                           | 31                |



| Reference                                                                | Abstract and title | Introduction and aims | Method and data | Sampling | Data analysis | Ethics and bias | Finding and results | Transferability and generalisability | Implications and usefulness | Total (out of 36) |
|--------------------------------------------------------------------------|--------------------|-----------------------|-----------------|----------|---------------|-----------------|---------------------|--------------------------------------|-----------------------------|-------------------|
| McDougall, T. Dresselhaus, and A. B. Hamilton. 2016                      |                    |                       |                 |          |               |                 |                     |                                      |                             |                   |
| Wutzke, S., M. Benton, and R. Verma. 2016                                | 4                  | 4                     | 4               | 3        | 4             | 4               | 4                   | 3                                    | 3                           | 33                |
| Zhao Y, Russell DJ, Guthridge S, et al. 2017                             | 4                  | 4                     | 4               | 3        | 4             | 3               | 4                   | 3                                    | 4                           | 33                |
| Lo Sardo DR, Thurner S, Sorger J, Duftschmid G, Endel G, Klimek P. 2019. | 3                  | 3                     | 2               | 1        | 4             | 1               | 4                   | 3                                    | 3                           | 24                |
| Williams I, Allen K, Plahe G. 2019.                                      | 3                  | 4                     | 4               | 4        | 4             | 4               | 4                   | 4                                    | 4                           | 35                |
| Ammentorp J, Bigi S, Silverman J, et al. 2021.                           | 4                  | 4                     | 3               | 3        | 4             | 3               | 4                   | 4                                    | 4                           | 33                |
| Bentley C, Peacock S, Abelson J, et al. 2019.                            | 4                  | 4                     | 3               | 3        | 3             | 3               | 4                   | 4                                    | 4                           | 32                |

1  
2  
3  
4  
5  
6  
7  
8  
9  
10  
11  
12  
13  
14  
15  
16  
17  
18  
19  
20  
21  
22  
23  
24  
25  
26  
27  
28  
29  
30  
31  
32  
33  
34  
35  
36  
37  
38  
39  
40  
41  
42  
43  
44  
45  
46  
47

| Reference                                                                                      | Abstract and title | Introduction and aims | Method and data | Sampling | Data analysis | Ethics and bias | Finding and results | Transferability and generalisability | Implications and usefulness | Total (out of 36) |
|------------------------------------------------------------------------------------------------|--------------------|-----------------------|-----------------|----------|---------------|-----------------|---------------------|--------------------------------------|-----------------------------|-------------------|
| Shen H, Sui Y, Fu Y. 2020.                                                                     | 4                  | 4                     | 2               | 2        | 4             | 4               | 4                   | 4                                    | 4                           | 32                |
| Fridell M, Edwin S, von Schreeb J, Saulnier DD. 2020.                                          | 4                  | 4                     | 3               | 3        | 4             | 4               | 4                   | 4                                    | 4                           | 34                |
| Pereno A, Eriksson D. 2020.                                                                    | 3                  | 4                     | 3               | 3        | 4             | 3               | 4                   | 4                                    | 4                           | 32                |
| Bogaert P, van Oers H, Van Oyen H. 2018.                                                       | 4                  | 4                     | 4               | 3        | 3             | 3               | 4                   | 4                                    | 4                           | 33                |
| Enticott J, Braaf S, Johnson A, Jones A, Teede HJ. 2020.                                       | 4                  | 4                     | 4               | 3        | 4             | 4               | 4                   | 3                                    | 4                           | 34                |
| Kilbourne AM, Braganza MZ, Bowersox NW, et al. 2019.                                           | 4                  | 3                     | 3               | 3        | 4             | 2               | 3                   | 4                                    | 4                           | 30                |
| Measuring universal health coverage based on an index of effective coverage of health services | 4                  | 4                     | 4               | 4        | 4             | 3               | 4                   | 4                                    | 4                           | 35                |

| Reference                                                                                                                     | Abstract and title | Introduction and aims | Method and data | Sampling | Data analysis | Ethics and bias | Finding and results | Transferability and generalisability | Implications and usefulness | Total (out of 36) |
|-------------------------------------------------------------------------------------------------------------------------------|--------------------|-----------------------|-----------------|----------|---------------|-----------------|---------------------|--------------------------------------|-----------------------------|-------------------|
| in 204 countries and territories, 1990-2019: a systematic analysis for the Global Burden of Disease Study 2019. Lancet. 2020. |                    |                       |                 |          |               |                 |                     |                                      |                             |                   |
| Barbazza E, Kringos D, Kruse I, Klazinga NS, Tello JE. 2019.                                                                  | 4                  | 4                     | 4               | 4        | 4             | 3               | 4                   | 3                                    | 3                           | 33                |

*Note.*

Each category is rated on a 4-point scale (from 1="very poor" to 4="good") to create a total score of up to 36.

1  
2  
3  
4  
5  
6  
7  
8  
9  
10  
11  
12  
13  
14  
15  
16  
17  
18  
19  
20  
21  
22  
23  
24  
25  
26  
27  
28  
29  
30  
31  
32  
33  
34  
35  
36  
37  
38  
39  
40  
41  
42  
43  
44  
45  
46  
47

**AACODS rating for editorial and opinion articles**

| Reference                                                                                                                                        | Authority  |                                                                                          | Accuracy   |                                                                                               | Coverage   |                                                                                                    | Objectivity |                                                                                                           | Date       |                                                                                           | Significance |                                                                                                                                          |
|--------------------------------------------------------------------------------------------------------------------------------------------------|------------|------------------------------------------------------------------------------------------|------------|-----------------------------------------------------------------------------------------------|------------|----------------------------------------------------------------------------------------------------|-------------|-----------------------------------------------------------------------------------------------------------|------------|-------------------------------------------------------------------------------------------|--------------|------------------------------------------------------------------------------------------------------------------------------------------|
|                                                                                                                                                  | Yes or no? | Comment                                                                                  | Yes or no? | Comment                                                                                       | Yes or no? | Comment                                                                                            | Yes or no?  | Comment                                                                                                   | Yes or no? | Comment                                                                                   | Yes or no?   | Comment                                                                                                                                  |
| Al Dhawi AA, West DJ, Jr., Spinelli RJ, Gompf TA. The challenge of sustaining health care in Oman. <i>Health Care Manager.</i> 2007;26(1):19-30. | Yes        | Authors have authority, relevant references included. Published in peer-reviewed journal | Yes        | Brief clear and met, peer reviewed                                                            | Yes        | Focus on Oman                                                                                      | Yes         | Author bias not explicitly stated, but standpoint is balanced                                             | Yes        | Context of article identifiable. Key contemporary references included                     | Yes          | Important article in recognising threats to the health system in Oman, and a model for sustaining healthcare reform in Oman is discussed |
| Amalberti, R., W. Nicklin, and J. Braithwaite . 2016. Preparing national health systems to cope with                                             | Yes        | Authors have authority, relevant references included. Published in peer-reviewed journal | Yes        | Aim not explicit, but article to report on an international workshop previously conducted. No | Yes        | Wide coverage, worldwide discussion encapsulating main issues associated with an ageing population | Yes         | Recognise this paper made in association with the International Society of Quality in Health Care (ISQua) | Yes        | Clear date acknowledgement as from 1960-currently (2016 when article was published) . Key | Yes          | Good summary of current worldwide problem, and nuance between cohorts of countries experienci                                            |

| Reference                                                                                                                                                                | Authority  |                                                                                          | Accuracy   |                                                                         | Coverage   |                                   | Objectivity |                                                                                                          | Date       |                                                                       | Significance |                                                                                                |
|--------------------------------------------------------------------------------------------------------------------------------------------------------------------------|------------|------------------------------------------------------------------------------------------|------------|-------------------------------------------------------------------------|------------|-----------------------------------|-------------|----------------------------------------------------------------------------------------------------------|------------|-----------------------------------------------------------------------|--------------|------------------------------------------------------------------------------------------------|
|                                                                                                                                                                          | Yes or no? | Comment                                                                                  | Yes or no? | Comment                                                                 | Yes or no? | Comment                           | Yes or no?  | Comment                                                                                                  | Yes or no? | Comment                                                               | Yes or no?   | Comment                                                                                        |
| the impending tsunami of ageing and its associated complexities: Towards more sustainable health care. Int J Qual Health Care 28 (3):412-414. doi:10.1093/intqhc/mzw021. |            |                                                                                          |            | method reported. Published in peer-reviewed journal                     |            |                                   |             | and participants from the countries involved. However, offers a balanced opinion of the issues discussed |            | references also included                                              |              | ng an ageing population to different extents                                                   |
| Armstrong BK, Gillespie JA, Leeder SR, Rubin GL, Russell LM. Challenges in health                                                                                        | Yes        | Authors have authority, relevant references included. Published in peer-reviewed journal | Yes        | Brief clearly stated in presenting the challenges to make a sustainable | Yes        | Focus on Australian health system | Yes         | Author bias not explicitly stated, but standpoint is balanced                                            | Yes        | Context of article identifiable. Key contemporary references included | Yes          | Unique and useful article outlining some main challenges of healthcare, tailored to the health |

1  
2  
3  
4  
5  
6  
7  
8  
9  
10  
11  
12  
13  
14  
15  
16  
17  
18  
19  
20  
21  
22  
23  
24  
25  
26  
27  
28  
29  
30  
31  
32  
33  
34  
35  
36  
37  
38  
39  
40  
41  
42  
43  
44  
45  
46  
47

| Reference                                                                                                                                             | Authority  |                                                                                          | Accuracy   |                                         | Coverage   |                                                                                                            | Objectivity |                                                               | Date       |                                                                       | Significance |                                                                                                                                   |
|-------------------------------------------------------------------------------------------------------------------------------------------------------|------------|------------------------------------------------------------------------------------------|------------|-----------------------------------------|------------|------------------------------------------------------------------------------------------------------------|-------------|---------------------------------------------------------------|------------|-----------------------------------------------------------------------|--------------|-----------------------------------------------------------------------------------------------------------------------------------|
|                                                                                                                                                       | Yes or no? | Comment                                                                                  | Yes or no? | Comment                                 | Yes or no? | Comment                                                                                                    | Yes or no?  | Comment                                                       | Yes or no? | Comment                                                               | Yes or no?   | Comment                                                                                                                           |
| and health care for Australia. <i>Medical Journal of Australia</i> . 2007;187(9):485-489.                                                             |            |                                                                                          |            | healthcare system                       |            |                                                                                                            |             |                                                               |            |                                                                       |              | system and context in question                                                                                                    |
| Atmore C. The role of medical generalism in the New Zealand health system into the future. <i>New Zealand Medical Journal</i> . 2015;128(1419):50-55. | Yes        | Authors have authority, relevant references included. Published in peer-reviewed journal | Yes        | Brief clear and met, no method provided | Yes        | New Zealand healthcare specific, but recognises that the solution could be applied to other health systems | Yes         | Author bias not explicitly stated, but standpoint is balanced | Yes        | Context of article identifiable. Key contemporary references included | Yes          | Emphasises the importance of being a generalist and how this could trailblaze this new role and system design for other countries |
| Barasa EW, Cloete K, Gilson L. From bouncing back, to                                                                                                 | Yes        | Authors have authority and are from various                                              | Yes        | Brief described and met. No methodolo   | Yes        | Worldwide coverage that aligns with the authors diverse                                                    | Yes         | Well balanced presentation incorporating                      | Yes        | Framed around the Ebola outbreak (2014-2016).                         | Yes          | Relevant worldwide to all health systems                                                                                          |

| Reference                                                                                                                                                   | Authority  |                                                                                                                   | Accuracy   |                                                        | Coverage   |                                   | Objectivity |                                                                                              | Date       |                                                                                                         | Significance |                                                                                                                        |
|-------------------------------------------------------------------------------------------------------------------------------------------------------------|------------|-------------------------------------------------------------------------------------------------------------------|------------|--------------------------------------------------------|------------|-----------------------------------|-------------|----------------------------------------------------------------------------------------------|------------|---------------------------------------------------------------------------------------------------------|--------------|------------------------------------------------------------------------------------------------------------------------|
|                                                                                                                                                             | Yes or no? | Comment                                                                                                           | Yes or no? | Comment                                                | Yes or no? | Comment                           | Yes or no?  | Comment                                                                                      | Yes or no? | Comment                                                                                                 | Yes or no?   | Comment                                                                                                                |
| nurturing emergence: reframing the concept of resilience in health systems strengthening. <i>Health policy and planning</i> . 2017;32(suppl_3):iii91-iii94. |            | continents around the globe, relevant references included. Published in peer-reviewed journal                     |            | gy provided                                            |            | backgrounds                       |             | worldwide need to nurture everyday resilience in healthcare, rather than just in emergencies |            | Contemporary references also used                                                                       |              |                                                                                                                        |
| Bessler JS, Ellies M. Values and value--a vision for the Australian health care system. <i>Australian Health Review</i> . 1995;18(3):6-17;                  | Partially  | Authors have authority in IT but not healthcare, relevant references included. Published in peer-reviewed journal | Yes        | Brief clear and met, no method provided, peer-reviewed | Yes        | Focus on Australian health system | Yes         | Author bias not explicitly stated, but standpoint is clear                                   | Yes        | Context of article identified as current (at time of publication). Key contemporary references included | Yes          | Investigates the need for health reform to address rising costs with the health system and increase its sustainability |

1  
2  
3  
4  
5  
6  
7  
8  
9  
10  
11  
12  
13  
14  
15  
16  
17  
18  
19  
20  
21  
22  
23  
24  
25  
26  
27  
28  
29  
30  
31  
32  
33  
34  
35  
36  
37  
38  
39  
40  
41  
42  
43  
44  
45  
46  
47

| Reference                                                                                                                                                                                                                  | Authority  |                                                                                                                                                                                      | Accuracy   |                                                                                                                                                                                                                   | Coverage   |                                                            | Objectivity |                                                                                                                | Date       |                                                                       | Significance |                                                |
|----------------------------------------------------------------------------------------------------------------------------------------------------------------------------------------------------------------------------|------------|--------------------------------------------------------------------------------------------------------------------------------------------------------------------------------------|------------|-------------------------------------------------------------------------------------------------------------------------------------------------------------------------------------------------------------------|------------|------------------------------------------------------------|-------------|----------------------------------------------------------------------------------------------------------------|------------|-----------------------------------------------------------------------|--------------|------------------------------------------------|
|                                                                                                                                                                                                                            | Yes or no? | Comment                                                                                                                                                                              | Yes or no? | Comment                                                                                                                                                                                                           | Yes or no? | Comment                                                    | Yes or no?  | Comment                                                                                                        | Yes or no? | Comment                                                               | Yes or no?   | Comment                                        |
| discussion 18-29.                                                                                                                                                                                                          |            |                                                                                                                                                                                      |            |                                                                                                                                                                                                                   |            |                                                            |             |                                                                                                                |            |                                                                       |              |                                                |
| Birch S, Murphy GT, MacKenzie A, Cumming J. In place of fear: aligning health care planning with system objectives to achieve financial sustainability. Journal of Health Services & Research Policy. 2015;20(2): 109-114. | Yes        | Authors have authority in a combination of fields (health economics, policy analysis, health services and nursing), relevant references included. Published in peer-reviewed journal | Yes        | Clear brief in outlining the current healthcare expenditure, and creating the healthcare sustainability framework to identify determinants of healthcare expenditure, so that it can evolve with population needs | Yes        | Worldwide, with examples from Australia, the UK and Canada | Yes         | Authors standpoint clear. Examples from numerous countries and from reviews in the field, seems well balanced. | Yes        | Context of article identifiable. Key contemporary references included | Yes          | Presents a healthcare sustainability framework |
| Buchan J. What difference                                                                                                                                                                                                  | Yes        | Authors have authority,                                                                                                                                                              | Yes        | Argument is clear                                                                                                                                                                                                 | Yes        | Worldwide context, relates                                 | Yes         | Authors standpoint is clear on                                                                                 | Yes        | Context of article identifiable                                       | Yes          | Contributes the importance                     |



| Reference                                                                                                                                                                                                                                                                           | Authority  |                                                                                          | Accuracy   |                                    | Coverage   |                                                                                                                                   | Objectivity |                                                               | Date       |                                                                       | Significance |                                                                                                                       |
|-------------------------------------------------------------------------------------------------------------------------------------------------------------------------------------------------------------------------------------------------------------------------------------|------------|------------------------------------------------------------------------------------------|------------|------------------------------------|------------|-----------------------------------------------------------------------------------------------------------------------------------|-------------|---------------------------------------------------------------|------------|-----------------------------------------------------------------------|--------------|-----------------------------------------------------------------------------------------------------------------------|
|                                                                                                                                                                                                                                                                                     | Yes or no? | Comment                                                                                  | Yes or no? | Comment                            | Yes or no? | Comment                                                                                                                           | Yes or no?  | Comment                                                       | Yes or no? | Comment                                                               | Yes or no?   | Comment                                                                                                               |
| <p>1<br/>2<br/>3<br/>4<br/>5<br/>6<br/>7<br/>8<br/>9<br/>10<br/>11<br/>12<br/>13<br/>14<br/>15<br/>16<br/>17<br/>18<br/>19<br/>20<br/>21<br/>22<br/>23<br/>24<br/>25</p> <p>does ("good") HRM make? <i>Human Resources for Health [Electronic Resource]</i>. 2004;2(1):6 .</p>      |            | relevant references included. Published in peer-reviewed journal                         |            | and balanced                       |            | discussion to meeting the sustainable development goals, and discusses the role of human resource management in the health system |             | the importance of human resource management                   |            | e. Key contemporary references included                               |              | e of implementing, disseminating and sustaining good HRM in health systems                                            |
| <p>26<br/>27<br/>28<br/>29<br/>30<br/>31<br/>32<br/>33<br/>34<br/>35<br/>36<br/>37<br/>38<br/>39<br/>40<br/>41<br/>42<br/>43<br/>44<br/>45<br/>46<br/>47</p> <p>Buchan JM, Naccarella L, Brooks PM. Is health workforce sustainability in Australia and New Zealand a realistic</p> | Yes        | Authors have authority, relevant references included. Published in peer-reviewed journal | Yes        | Brief clear and met, peer reviewed | Yes        | Australia and New Zealand context                                                                                                 | Yes         | Author bias not explicitly stated, but standpoint is balanced | Yes        | Context of article identifiable. Key contemporary references included | Yes          | Important argument that the health systems in Australia and New Zealand need more focus on prevention, and increasing |

| Reference                                                                                                                                           | Authority  |                                                                                          | Accuracy   |                                            | Coverage   |                                               | Objectivity |                                                                                                     | Date       |                                                                                                                         | Significance |                                                 |
|-----------------------------------------------------------------------------------------------------------------------------------------------------|------------|------------------------------------------------------------------------------------------|------------|--------------------------------------------|------------|-----------------------------------------------|-------------|-----------------------------------------------------------------------------------------------------|------------|-------------------------------------------------------------------------------------------------------------------------|--------------|-------------------------------------------------|
|                                                                                                                                                     | Yes or no? | Comment                                                                                  | Yes or no? | Comment                                    | Yes or no? | Comment                                       | Yes or no?  | Comment                                                                                             | Yes or no? | Comment                                                                                                                 | Yes or no?   | Comment                                         |
| <p>policy goal?<br/> <i>Australian health review: a publication of the Australian Hospital Association</i>.<br/>           2011;35(2): 152-155.</p> |            |                                                                                          |            |                                            |            |                                               |             |                                                                                                     |            |                                                                                                                         |              | the productivity of the health system           |
| <p>Burgess LH, Cohen MR, Denham CR. A new leadership role for pharmacists: a prescription for change. <i>Journal of patient safety</i>.</p>         | Yes        | Authors have authority, relevant references included. Published in peer-reviewed journal | Yes        | Aim and method well defined and adhered to | Yes        | Worldwide, focusing on pharmacists as leaders | Yes         | Author bias not explicitly stated, but standpoint is balanced and based on peer-reviewed literature | Yes        | Context of article identifiable but date range of literature search not disclosed. Key contemporary references included | Yes          | Argues for the importance of pharmacist leaders |

| Reference                                                                                                                              | Authority  |                                                                                          | Accuracy   |                                                                                                     | Coverage   |                                                      | Objectivity |                                                               | Date       |                                                                       | Significance |                                                                                                                                |
|----------------------------------------------------------------------------------------------------------------------------------------|------------|------------------------------------------------------------------------------------------|------------|-----------------------------------------------------------------------------------------------------|------------|------------------------------------------------------|-------------|---------------------------------------------------------------|------------|-----------------------------------------------------------------------|--------------|--------------------------------------------------------------------------------------------------------------------------------|
|                                                                                                                                        | Yes or no? | Comment                                                                                  | Yes or no? | Comment                                                                                             | Yes or no? | Comment                                              | Yes or no?  | Comment                                                       | Yes or no? | Comment                                                               | Yes or no?   | Comment                                                                                                                        |
| 2010;6(1):31-37.                                                                                                                       |            |                                                                                          |            |                                                                                                     |            |                                                      |             |                                                               |            |                                                                       |              |                                                                                                                                |
| Casale CR, Clancy CM. Commentary: Not about us without us. <i>Academic Medicine</i> . 2009;84(10):1333-1335.                           | Yes        | Authors have authority, relevant references included. Published in peer-reviewed journal | Yes        | Clear brief to argue for the use of community-based participatory research for improving healthcare | Yes        | Focus on United States of America health system      | Yes         | Author bias not stated, but recognises the bias in healthcare | Yes        | Context of article identifiable. Key contemporary references included | Yes          | Presents theoretical arguments for community-based participatory research in response to another article in the journal        |
| Cashin A. The challenge of nurse innovation in the Australian context of universal health care. <i>Collegian</i> . 2015;22(3):319-324. | Yes        | Authors have authority, relevant references included. Published in peer-reviewed journal | Yes        | Brief clear and met, no method provided                                                             | Yes        | Focus on Australian context, with emphasis on nurses | Yes         | Author bias not explicitly stated, but standpoint is balanced | Yes        | Context of article identifiable. Key contemporary references included | Yes          | Important article in detailing the concept of universal healthcare applied to Australia to empower nurse led health innovation |

1  
2  
3  
4  
5  
6  
7  
8  
9  
10  
11  
12  
13  
14  
15  
16  
17  
18  
19  
20  
21  
22  
23  
24  
25  
26  
27  
28  
29  
30  
31  
32  
33  
34  
35  
36  
37  
38  
39  
40  
41  
42  
43  
44  
45  
46  
47

| Reference                                                                                                                                                               | Authority  |                                                      | Accuracy   |                                                                                                                          | Coverage   |                                                                        | Objectivity |                                                               | Date       |                                                                       | Significance |                                                                             |
|-------------------------------------------------------------------------------------------------------------------------------------------------------------------------|------------|------------------------------------------------------|------------|--------------------------------------------------------------------------------------------------------------------------|------------|------------------------------------------------------------------------|-------------|---------------------------------------------------------------|------------|-----------------------------------------------------------------------|--------------|-----------------------------------------------------------------------------|
|                                                                                                                                                                         | Yes or no? | Comment                                              | Yes or no? | Comment                                                                                                                  | Yes or no? | Comment                                                                | Yes or no?  | Comment                                                       | Yes or no? | Comment                                                               | Yes or no?   | Comment                                                                     |
| Chambers DA, Glasgow RE, Stange KC. The dynamic sustainability framework: addressing the paradox of sustainment amid ongoing change. <i>Implement Sci.</i> 2013;8:117 . | Yes        | Authors have authority, relevant references included | Yes        | Aim of research is clear in responding to two frequent assumptions about sustainability (voltage drop and program drift) | Yes        | Specific to United States of America health system                     | Yes         | Bias not explicitly stated but authors standpoint is balanced | Yes        | Context of article identifiable. Key contemporary references included | Yes          | Significant as it adds the Dynamic Sustainability Network to the literature |
| Coiera E, Hovenga EJ. Building a sustainable health system. <i>Yearb Med</i>                                                                                            | Yes        | Authors have authority, relevant references included | Yes        | Research aim identified and met                                                                                          | Yes        | Worldwide, but focuses on the sustainability of current health systems | Yes         | Bias not explicitly stated but is present                     | Yes        | Context of article identifiable. Key contemporary references included | Yes          | Important article with advice on the measurement and improvement of         |

| Reference                                                                                                                | Authority  |                                                                                                                                                                        | Accuracy   |                                                                                                                                                                    | Coverage   |                                           | Objectivity |                                                   | Date       |                                                                                                                                              | Significance |                                                                                                                                            |
|--------------------------------------------------------------------------------------------------------------------------|------------|------------------------------------------------------------------------------------------------------------------------------------------------------------------------|------------|--------------------------------------------------------------------------------------------------------------------------------------------------------------------|------------|-------------------------------------------|-------------|---------------------------------------------------|------------|----------------------------------------------------------------------------------------------------------------------------------------------|--------------|--------------------------------------------------------------------------------------------------------------------------------------------|
|                                                                                                                          | Yes or no? | Comment                                                                                                                                                                | Yes or no? | Comment                                                                                                                                                            | Yes or no? | Comment                                   | Yes or no?  | Comment                                           | Yes or no? | Comment                                                                                                                                      | Yes or no?   | Comment                                                                                                                                    |
| Inform 2007:11–8.                                                                                                        |            |                                                                                                                                                                        |            |                                                                                                                                                                    |            |                                           |             |                                                   |            |                                                                                                                                              |              | health system sustainability                                                                                                               |
| Crisp N. What would a sustainable health and care system look like? <i>BMJ (Clinical research ed.)</i> . 2017;358:j3895. | Yes        | Authors have authority as a member of the House of Lords (and is talking specifically about the NHS), relevant references included. Published in peer-reviewed journal | Yes        | Clear brief to argue that sustainability depends on seven factors and that cross-sectional partnerships are needed to increase resilience. No methodology provided | Yes        | NHS specific                              | Yes         | Authors standpoint is clear in their argument     | Yes        | No date specifically, but from 1978 at the Alma Ata Declaration onwards to time of publication (2017). Contemporary references also included | Yes          | Recognition of some factors that need more attention, and also needs further underpinning by the economy and through creative partnerships |
| Delgado, P. 2016. Meeting the Challenge                                                                                  | Yes        | Authors have authority, relevant references                                                                                                                            | Yes        | Aim to explore the aims of the Atlantic                                                                                                                            | Yes        | Designed to answer or discuss the aim. No | Yes         | Bias not explicitly stated but authors standpoint | Yes        | Context of article identifiable but not specific to                                                                                          | Yes          | Contributes questions and suggestions                                                                                                      |

1  
2  
3  
4  
5  
6  
7  
8  
9  
10  
11  
12  
13  
14  
15  
16  
17  
18  
19  
20  
21  
22  
23  
24  
25  
26  
27  
28  
29  
30  
31  
32  
33  
34  
35  
36  
37  
38  
39  
40  
41  
42  
43  
44  
45  
46  
47

| Reference                                                                                                                     | Authority  |                                                                                          | Accuracy   |                                                                                                                                    | Coverage   |                                                                                                  | Objectivity |                                                                           | Date       |                                                                                                                                                               | Significance |                                                                |
|-------------------------------------------------------------------------------------------------------------------------------|------------|------------------------------------------------------------------------------------------|------------|------------------------------------------------------------------------------------------------------------------------------------|------------|--------------------------------------------------------------------------------------------------|-------------|---------------------------------------------------------------------------|------------|---------------------------------------------------------------------------------------------------------------------------------------------------------------|--------------|----------------------------------------------------------------|
|                                                                                                                               | Yes or no? | Comment                                                                                  | Yes or no? | Comment                                                                                                                            | Yes or no? | Comment                                                                                          | Yes or no?  | Comment                                                                   | Yes or no? | Comment                                                                                                                                                       | Yes or no?   | Comment                                                        |
| of Chronic Conditions in a Sustainable Manner: Building on the AHC Learning. Healthc Pap 15 Spec No:90-95; discussion 97-123. |            | included. Published in peer-reviewed journal                                             |            | Healthcare Collaboration for Innovation and Improvement in Chronic Disease (AHC) and its areas of success and possible improvement |            | specific method section, but qualitative and quantitative methods employed in a separate article |             | is clear and based on evidence from past research                         |            | a particular 'date' e.g., research in area was published in 2005, whilst opinion piece published in 2016. However, other key contemporary references included |              | s for future research                                          |
| Dhalla I. Canada's health care system and the sustainability paradox. <i>Cmaj</i> . 2007;177(1):51-53.                        | Yes        | Authors have authority, relevant references included. Published in peer-reviewed journal | Yes        | Brief stated, view is balanced with arguments from opposing view                                                                   | Yes        | Specific to Canadian health system, with Ontario as an example                                   | Yes         | Bias not explicitly stated, but work seems well balanced and acknowledges | Yes        | Context of article identifiable. Key contemporary references included                                                                                         | Yes          | Argument is relevant and adds new ideas to existing literature |

| Reference                                                                                                                                                                                  | Authority  |                                                                                          | Accuracy   |                                                          | Coverage   |                                                             | Objectivity |                                                                       | Date       |                                                               | Significance |                                                     |
|--------------------------------------------------------------------------------------------------------------------------------------------------------------------------------------------|------------|------------------------------------------------------------------------------------------|------------|----------------------------------------------------------|------------|-------------------------------------------------------------|-------------|-----------------------------------------------------------------------|------------|---------------------------------------------------------------|--------------|-----------------------------------------------------|
|                                                                                                                                                                                            | Yes or no? | Comment                                                                                  | Yes or no? | Comment                                                  | Yes or no? | Comment                                                     | Yes or no?  | Comment                                                               | Yes or no? | Comment                                                       | Yes or no?   | Comment                                             |
|                                                                                                                                                                                            |            |                                                                                          |            |                                                          |            |                                                             |             | counter-arguments                                                     |            |                                                               |              |                                                     |
| Edwards, N., M. Rowan, P. Marck, and D. Grinspun. 2011. Understanding whole systems change in health care: the case of nurse practitioners in Canada. Policy Polit Nurs Pract 12 (1):4-17. | Yes        | Authors have authority, relevant references included. Published in peer-reviewed journal | Yes        | Clear aim and methods provided                           | Yes        | Specific to Canadian healthcare system                      | Yes         | Bias not stated, article is balanced and limitations are acknowledged | Yes        | Contemporary references included                              | Yes          | Relevant to Canada's healthcare system              |
| Ellner, A. L., S. Stout, E. E. Sullivan, E. P. Griffiths,                                                                                                                                  | Yes        | Authors have authority, relevant references included.                                    | Yes        | Aim to argue for increased support for health innovators | Yes        | Define the scope of their article in introduction: defining | Yes         | Argue that increased support is needed to advance healthcare          | Yes        | Context of article identifiable but not specific (identified) | Yes          | Relevant to US academic medicine, educating medical |

1  
2  
3  
4  
5  
6  
7  
8  
9  
10  
11  
12  
13  
14  
15  
16  
17  
18  
19  
20  
21  
22  
23  
24  
25  
26  
27  
28  
29  
30  
31  
32  
33  
34  
35  
36  
37  
38  
39  
40  
41  
42  
43  
44  
45  
46  
47

| Reference                                                                                                                                                                                             | Authority  |                                             | Accuracy   |                                                                           | Coverage   |                                                                                                                                                                | Objectivity |                                                   | Date       |                                                                    | Significance |                                                                 |
|-------------------------------------------------------------------------------------------------------------------------------------------------------------------------------------------------------|------------|---------------------------------------------|------------|---------------------------------------------------------------------------|------------|----------------------------------------------------------------------------------------------------------------------------------------------------------------|-------------|---------------------------------------------------|------------|--------------------------------------------------------------------|--------------|-----------------------------------------------------------------|
|                                                                                                                                                                                                       | Yes or no? | Comment                                     | Yes or no? | Comment                                                                   | Yes or no? | Comment                                                                                                                                                        | Yes or no?  | Comment                                           | Yes or no? | Comment                                                            | Yes or no?   | Comment                                                         |
| A. Mountjoy, and R. S. Phillips. 2015. Health Systems Innovation at Academic Health Centers: Leading in a New Era of Health Care Delivery. Acad Med 90 (7):872-880. doi:10.1097/acm.0000000000000679. |            | Published in peer-reviewed journal          |            | in academic health centres in the US, and define health system innovation |            | health system innovation , distinguish ing it from quality improvem ent, and examining career opportunit ies for those who will lead health systems innovation |             | goals in academic health centers                  |            | as 21st century in article). Key contempor ary references included |              | students, and trying to allow healthcare at a sustainabl e cost |
| Fineberg HV. Shattuck Lecture. A successful                                                                                                                                                           | Yes        | Authors have authority, relevant references | Yes        | Clear examinati on of USA health system                                   | Yes        | American healthcare context                                                                                                                                    | Yes         | Author bias not explicitly stated, but standpoint | Yes        | Context of article identifiabl e as after the 2010                 | Yes          | Recognise s that many steps are needed to                       |



| Reference                                                                                                            | Authority  |                                                      | Accuracy   |                                         | Coverage   |                                                         | Objectivity |                                                          | Date       |                                                                                  | Significance |                                                                                                   |
|----------------------------------------------------------------------------------------------------------------------|------------|------------------------------------------------------|------------|-----------------------------------------|------------|---------------------------------------------------------|-------------|----------------------------------------------------------|------------|----------------------------------------------------------------------------------|--------------|---------------------------------------------------------------------------------------------------|
|                                                                                                                      | Yes or no? | Comment                                              | Yes or no? | Comment                                 | Yes or no? | Comment                                                 | Yes or no?  | Comment                                                  | Yes or no? | Comment                                                                          | Yes or no?   | Comment                                                                                           |
| and sustainable health system-- how to get there from here. New England Journal of Medicine. 2012;366(11):1020-1027. |            | included. Published in peer-reviewed journal         |            | and how to increase its sustainability  |            |                                                         |             | is balanced                                              |            | Patient Protection and Affordable Care Act. Key contemporary references included |              | ensure a sustainable health system, and identifies characteristics of a sustainable health system |
| Gruen RL, Elliott JH, Nolan ML, Lawton PD, Parkhill A, McLaren CJ, Lavis JN.                                         | Yes        | Authors have authority, relevant references included | Yes        | Research aim and methods stated and met | Yes        | Scope of article clearly defined                        | Yes         | Author bias not stated but viewpoint is balanced         | Yes        | Context of article identifiable. Key contemporary references included            | Yes          | Contributes to conversation around health system sustainability                                   |
| Greenhalgh T, F. Macfarlane, C. Barton-Sweeney, and F. Woodard.                                                      | Yes        | Authors have authority, relevant references included | Yes        | Research aim and methods stated and met | Yes        | Based in London health system, but significance extends | Yes         | Bias minimized through administering of questionnaire by | Yes        | Context of article identifiable. Key contemporary                                | Yes          | Important article with significance for improving and                                             |

1  
2  
3  
4  
5  
6  
7  
8  
9  
10  
11  
12  
13  
14  
15  
16  
17  
18  
19  
20  
21  
22  
23  
24  
25  
26  
27  
28  
29  
30  
31  
32  
33  
34  
35  
36  
37  
38  
39  
40  
41  
42  
43  
44  
45  
46  
47

| Reference                                                                                                                                                                  | Authority  |                                                                                          | Accuracy   |                                         | Coverage   |                                 | Objectivity |                                                               | Date       |                                                                                                | Significance |                                                                                  |
|----------------------------------------------------------------------------------------------------------------------------------------------------------------------------|------------|------------------------------------------------------------------------------------------|------------|-----------------------------------------|------------|---------------------------------|-------------|---------------------------------------------------------------|------------|------------------------------------------------------------------------------------------------|--------------|----------------------------------------------------------------------------------|
|                                                                                                                                                                            | Yes or no? | Comment                                                                                  | Yes or no? | Comment                                 | Yes or no? | Comment                         | Yes or no?  | Comment                                                       | Yes or no? | Comment                                                                                        | Yes or no?   | Comment                                                                          |
| 2012. "If we build it, will it stay?" A case study of the sustainability of whole-system change in London. Milbank Q 90 (3):516-547. doi:10.1111/j.1468-0009.2012.00673.x. |            |                                                                                          |            |                                         |            | beyond that                     |             | blinded researchers                                           |            | references included                                                                            |              | scaling system change that can be applied to other health systems                |
| Guyon A, Hancock T, Kirk M, et al. The weakening of public health: A threat to population health and                                                                       | Yes        | Authors have authority, relevant references included. Published in peer-reviewed journal | Yes        | Brief clear and met, no method provided | Yes        | Focus on Canadian health system | Yes         | Author bias not explicitly stated, but standpoint is balanced | Yes        | Context of article identifiable and discusses current government policy (at time of publicatio | Yes          | Identifies issues with government approach to public health and responds to each |

| Reference                                                                                                                                       | Authority  |                                                                                                       | Accuracy   |                                         | Coverage   |                                                                  | Objectivity |                                                                                                          | Date       |                                                                                | Significance |                                                                                                      |
|-------------------------------------------------------------------------------------------------------------------------------------------------|------------|-------------------------------------------------------------------------------------------------------|------------|-----------------------------------------|------------|------------------------------------------------------------------|-------------|----------------------------------------------------------------------------------------------------------|------------|--------------------------------------------------------------------------------|--------------|------------------------------------------------------------------------------------------------------|
|                                                                                                                                                 | Yes or no? | Comment                                                                                               | Yes or no? | Comment                                 | Yes or no? | Comment                                                          | Yes or no?  | Comment                                                                                                  | Yes or no? | Comment                                                                        | Yes or no?   | Comment                                                                                              |
| health care system sustainability.<br><i>Canadian Journal of Public Health. Revue Canadienne de Sante Publique.</i> 2017;108(1):e1-e6.          |            |                                                                                                       |            |                                         |            |                                                                  |             |                                                                                                          |            | n) in Canada. Key contemporary references included                             |              |                                                                                                      |
| Hovenga EJ. Impact of data governance on a nation's healthcare system building blocks.<br><i>Studies in Health Technology &amp; Informatics</i> | Partially  | Authors have authority, relevant references included. Unable to determine if journal is peer-reviewed | Yes        | Brief clear and met, no method provided | Yes        | Worldwide, focusing on 'a nation' to explain national healthcare | Yes         | Author bias not explicitly stated, standpoint based on reputable sources e.g., world health organisation | Yes        | Context of article identified as current. Key contemporary references included | Yes          | Important article educating readers about IT and healthcare and sustainability of that health system |

1  
2  
3  
4  
5  
6  
7  
8  
9  
10  
11  
12  
13  
14  
15  
16  
17  
18  
19  
20  
21  
22  
23  
24  
25  
26  
27  
28  
29  
30  
31  
32  
33  
34  
35  
36  
37  
38  
39  
40  
41  
42  
43  
44  
45  
46  
47

| Reference                                                                                                                                                                                             | Authority  |                                                                                          | Accuracy   |                                                       | Coverage   |                                                | Objectivity |                                                             | Date       |                                                                       | Significance |                                                                                    |
|-------------------------------------------------------------------------------------------------------------------------------------------------------------------------------------------------------|------------|------------------------------------------------------------------------------------------|------------|-------------------------------------------------------|------------|------------------------------------------------|-------------|-------------------------------------------------------------|------------|-----------------------------------------------------------------------|--------------|------------------------------------------------------------------------------------|
|                                                                                                                                                                                                       | Yes or no? | Comment                                                                                  | Yes or no? | Comment                                               | Yes or no? | Comment                                        | Yes or no?  | Comment                                                     | Yes or no? | Comment                                                               | Yes or no?   | Comment                                                                            |
| .<br>2013;193:24-66.                                                                                                                                                                                  |            |                                                                                          |            |                                                       |            |                                                |             |                                                             |            |                                                                       |              |                                                                                    |
| Inotai A, Petrova G, Vitezic D, Kalo Z. Benefits of investment into modern medicines in Central-Eastern European countries. Expert review of pharmacoeconomics & outcomes research. 2014;14(1):71-79. | Yes        | Authors have authority, relevant references included. Published in peer-reviewed journal | Yes        | Aim clearly stated and adhered to. No method provided | Yes        | Specific to Central Eastern European countries | Yes         | Authors standpoint is balanced, citing research and the WHO | Yes        | Context of article identifiable. Key contemporary references included | Yes          | Relevant, useful arguments for Central Eastern European health systems to consider |
| Kepros JP, Opreanu RC. A new model for                                                                                                                                                                | Yes        | Authors have authority, relevant                                                         | Yes        | Brief stated and examines the                         | Yes        | United States of America                       | Yes         | Authors standpoint clear, bias not                          | Yes        | Context of article identifiable. Key                                  | Yes          | Adds historical context to relationshi                                             |

| Reference                                                                                                                                                   | Authority  |                                                         | Accuracy   |                                                                         | Coverage   |                                                                         | Objectivity |                                                               | Date       |                                                                       | Significance |                                                                                                                          |
|-------------------------------------------------------------------------------------------------------------------------------------------------------------|------------|---------------------------------------------------------|------------|-------------------------------------------------------------------------|------------|-------------------------------------------------------------------------|-------------|---------------------------------------------------------------|------------|-----------------------------------------------------------------------|--------------|--------------------------------------------------------------------------------------------------------------------------|
|                                                                                                                                                             | Yes or no? | Comment                                                 | Yes or no? | Comment                                                                 | Yes or no? | Comment                                                                 | Yes or no?  | Comment                                                       | Yes or no? | Comment                                                               | Yes or no?   | Comment                                                                                                                  |
| health care delivery. <i>BMC health services research</i> . 2009;9:57.                                                                                      |            | references included. Published in peer-reviewed journal |            | evolving relationship between hospitals, medical schools and physicians |            | health system                                                           |             | explicitly mentioned                                          |            | contemporary references included                                      |              | p between medical schools, hospitals and physicians , and examines the shared vision for the future                      |
| Knutson, D. J. 1997. The role of strategic alliances in ensuring health care quality: a health care system perspective . <i>Clin Ther</i> 19 (6):1572-1578. | Partially  | Authors have authority, but no references included      | Yes        | Brief clear and met, no method provided                                 | Yes        | Specific to HealthSystems Minnesota , but may be applicable more widely | Yes         | Author bias not explicitly stated, but standpoint is balanced | Yes        | Context of article identifiable. Key contemporary references included | Yes          | Important article that focuses on the Chronic Illness Management Research and Development Project (CIMRDP ) in Minnesota |
| Lehoux P, Williams-Jones B,                                                                                                                                 | Yes        | Authors are associated                                  | Yes        | Authors clear experts in                                                | Yes        | Coverage is worldwide                                                   | Yes         | Authors have more knowledge                                   | Yes        | Context of article identifiable                                       | Yes          | Applicable worldwide for                                                                                                 |

1  
2  
3  
4  
5  
6  
7  
8  
9  
10  
11  
12  
13  
14  
15  
16  
17  
18  
19  
20  
21  
22  
23  
24  
25  
26  
27  
28  
29  
30  
31  
32  
33  
34  
35  
36  
37  
38  
39  
40  
41  
42  
43  
44  
45  
46  
47

| Reference                                                                                                                                                                                                                | Authority  |                                                                                   | Accuracy   |                                                                                                                        | Coverage   |                                                                                                                 | Objectivity |                                                                                                                                                                                                                                            | Date       |                                         | Significance |                                                                                                                           |
|--------------------------------------------------------------------------------------------------------------------------------------------------------------------------------------------------------------------------|------------|-----------------------------------------------------------------------------------|------------|------------------------------------------------------------------------------------------------------------------------|------------|-----------------------------------------------------------------------------------------------------------------|-------------|--------------------------------------------------------------------------------------------------------------------------------------------------------------------------------------------------------------------------------------------|------------|-----------------------------------------|--------------|---------------------------------------------------------------------------------------------------------------------------|
|                                                                                                                                                                                                                          | Yes or no? | Comment                                                                           | Yes or no? | Comment                                                                                                                | Yes or no? | Comment                                                                                                         | Yes or no?  | Comment                                                                                                                                                                                                                                    | Yes or no? | Comment                                 | Yes or no?   | Comment                                                                                                                   |
| Miller F, Urbach D, Tailliez S. What leads to better health care innovation? Arguments for an integrated policy-oriented research agenda. <i>Journal of Health Services &amp; Research Policy</i> . 2008;13(4): 251-254. |            | with reputable organisations in their fields. Published in peer reviewed journal. |            | the field within the Canadian Health system, and contemporary references are cited. Published in peer reviewed journal |            | with very broad factors of sustainability being discussed, drawing on a workshop at an international conference |             | regarding Canadian system than worldwide and this is stated. The participants from the workshop at the Invitational Workshop of Innovations in Health, from which this paper arose, included participants from Canada, England, Wales, and |            | e. Key contemporary references included |              | industrialized countries to adopt a new kind of policy-oriented research based on relevance, usability and sustainability |

1  
2  
3  
4  
5  
6  
7  
8  
9  
10  
11  
12  
13  
14  
15  
16  
17  
18  
19  
20  
21  
22  
23  
24  
25  
26  
27  
28  
29  
30  
31  
32  
33  
34  
35  
36  
37  
38  
39  
40  
41  
42  
43  
44  
45  
46  
47

| Reference                                                                                       | Authority  |                                                                                          | Accuracy   |         | Coverage   |                                           | Objectivity |                                                                                                                                               | Date       |         | Significance |         |
|-------------------------------------------------------------------------------------------------|------------|------------------------------------------------------------------------------------------|------------|---------|------------|-------------------------------------------|-------------|-----------------------------------------------------------------------------------------------------------------------------------------------|------------|---------|--------------|---------|
|                                                                                                 | Yes or no? | Comment                                                                                  | Yes or no? | Comment | Yes or no? | Comment                                   | Yes or no?  | Comment                                                                                                                                       | Yes or no? | Comment | Yes or no?   | Comment |
|                                                                                                 |            |                                                                                          |            |         |            |                                           |             | Finland. The event was funded by various Canadian grants. This standpoint is clear by the Authors, and yet their opinion piece seems balanced |            |         |              |         |
| Levin L, Goeree R, Levine M, et al. Coverage with evidence development: the Ontario experience. | Yes        | Authors have authority, relevant references included. Published in peer-reviewed journal | Yes        |         | Yes        | Focus on health system in Ontario, Canada | Yes         |                                                                                                                                               |            |         |              |         |

1  
2  
3  
4  
5  
6  
7  
8  
9  
10  
11  
12  
13  
14  
15  
16  
17  
18  
19  
20  
21  
22  
23  
24  
25  
26  
27  
28  
29  
30  
31  
32  
33  
34  
35  
36  
37  
38  
39  
40  
41  
42  
43  
44  
45  
46  
47

| Reference                                                                                                                                      | Authority  |                                                                                          | Accuracy   |                                         | Coverage   |                                  | Objectivity |                                                               | Date       |                                                                       | Significance |                                                                                                         |
|------------------------------------------------------------------------------------------------------------------------------------------------|------------|------------------------------------------------------------------------------------------|------------|-----------------------------------------|------------|----------------------------------|-------------|---------------------------------------------------------------|------------|-----------------------------------------------------------------------|--------------|---------------------------------------------------------------------------------------------------------|
|                                                                                                                                                | Yes or no? | Comment                                                                                  | Yes or no? | Comment                                 | Yes or no? | Comment                          | Yes or no?  | Comment                                                       | Yes or no? | Comment                                                               | Yes or no?   | Comment                                                                                                 |
| International journal of technology assessment in health care. 2011;27(2):159-168.                                                             |            |                                                                                          |            |                                         |            |                                  |             |                                                               |            |                                                                       |              |                                                                                                         |
| Lewis S. Can a learning-disabled nation learn healthcare lessons from abroad? <i>Healthcare policy = Politiques de sante.</i> 2007;3(2):19-28. | Yes        | Authors have authority, relevant references included. Published in peer-reviewed journal | Yes        | Brief clear and met, no method provided | Yes        | Focus on Canadian health system  | Yes         | Author bias not explicitly stated, but standpoint is balanced | Yes        | Context of article identifiable. Key contemporary references included | Yes          | Unique perspective, arguing for the focus on other aspects of the health system than its sustainability |
| Liaropoulos L, Goranitis I. Health care                                                                                                        | Yes        | Authors have authority, relevant                                                         | Yes        | Brief clear and met, no method provided | Yes        | Worldwide, but focusing on cost- | Yes         | Author bias not explicitly stated, but                        | Yes        | Context of article identifiable. Key                                  | Yes          | Investigates the sustainability of                                                                      |



| Reference                                                                                                                                                         | Authority  |                                                                                 | Accuracy   |                                                         | Coverage   |                                 | Objectivity |                                                                                                                                       | Date       |                                                                       | Significance |                                                                                                                   |
|-------------------------------------------------------------------------------------------------------------------------------------------------------------------|------------|---------------------------------------------------------------------------------|------------|---------------------------------------------------------|------------|---------------------------------|-------------|---------------------------------------------------------------------------------------------------------------------------------------|------------|-----------------------------------------------------------------------|--------------|-------------------------------------------------------------------------------------------------------------------|
|                                                                                                                                                                   | Yes or no? | Comment                                                                         | Yes or no? | Comment                                                 | Yes or no? | Comment                         | Yes or no?  | Comment                                                                                                                               | Yes or no? | Comment                                                               | Yes or no?   | Comment                                                                                                           |
| financing and the sustainability of health systems. <i>International journal for equity in health.</i> 2015;14:80 .                                               |            | references included. Published in peer-reviewed journal                         |            |                                                         |            | effectiveness of health systems |             | standpoint is balanced                                                                                                                |            | contemporary references included                                      |              | healthcare financing around the world                                                                             |
| Lozano I, Rondan J, Vegas JM, Segovia E. Sustainability of the Health System: Beyond Cost-effectiveness Analyses. <i>Revista espanola de cardiologia (English</i> | Partially  | Authors have authority, relevant references included. Journal not peer-reviewed | Yes        | Brief clear in replying to original article. No methods | Yes        | Spanish health system context   | Yes         | Author bias not explicitly stated, but standpoint is balanced in addressing original article's viewpoint and rebutting as appropriate | Yes        | Context of article identifiable. Key contemporary references included | Yes          | Argues that the Spanish health system has many strengths, but one of its weaknesses is the lack of sustainability |

1  
2  
3  
4  
5  
6  
7  
8  
9  
10  
11  
12  
13  
14  
15  
16  
17  
18  
19  
20  
21  
22  
23  
24  
25  
26  
27  
28  
29  
30  
31  
32  
33  
34  
35  
36  
37  
38  
39  
40  
41  
42  
43  
44  
45  
46  
47

| Reference                                                                                                                                                                                                                 | Authority  |                                                                                          | Accuracy   |                                         | Coverage   |                         | Objectivity |                                                               | Date       |                                                                                                            | Significance |                                                                                                                   |
|---------------------------------------------------------------------------------------------------------------------------------------------------------------------------------------------------------------------------|------------|------------------------------------------------------------------------------------------|------------|-----------------------------------------|------------|-------------------------|-------------|---------------------------------------------------------------|------------|------------------------------------------------------------------------------------------------------------|--------------|-------------------------------------------------------------------------------------------------------------------|
|                                                                                                                                                                                                                           | Yes or no? | Comment                                                                                  | Yes or no? | Comment                                 | Yes or no? | Comment                 | Yes or no?  | Comment                                                       | Yes or no? | Comment                                                                                                    | Yes or no?   | Comment                                                                                                           |
| <i>ed.</i><br>2016;69(9):<br>880-881.                                                                                                                                                                                     |            |                                                                                          |            |                                         |            |                         |             |                                                               |            |                                                                                                            |              |                                                                                                                   |
| Mackenzie J. The old care paradigm is dead, long live the new sustainable care paradigm: how can GP commissioning consortia meet the demand challenges of 21st century healthcare? <i>London journal of primary care.</i> | Yes        | Authors have authority, relevant references included. Published in peer-reviewed journal | Yes        | Brief clear and met, no method provided | Yes        | Focus on United Kingdom | Yes         | Author bias not explicitly stated, but standpoint is balanced | Yes        | Context of article identifiable as beginning from 1948 until present. Key contemporary references included | Yes          | Examines the significance of prevention rather than treatment to increase the sustainability of the health system |

| Reference                                                                                                                                | Authority  |                                                                                          | Accuracy   |                                                           | Coverage   |                                                 | Objectivity |                                                               | Date       |                                                                       | Significance |                                                                          |
|------------------------------------------------------------------------------------------------------------------------------------------|------------|------------------------------------------------------------------------------------------|------------|-----------------------------------------------------------|------------|-------------------------------------------------|-------------|---------------------------------------------------------------|------------|-----------------------------------------------------------------------|--------------|--------------------------------------------------------------------------|
|                                                                                                                                          | Yes or no? | Comment                                                                                  | Yes or no? | Comment                                                   | Yes or no? | Comment                                         | Yes or no?  | Comment                                                       | Yes or no? | Comment                                                               | Yes or no?   | Comment                                                                  |
| 2011;4(1):64-68.                                                                                                                         |            |                                                                                          |            |                                                           |            |                                                 |             |                                                               |            |                                                                       |              |                                                                          |
| Magnan S, Fisher E, Kindig D, et al. Achieving accountability for health and health care. <i>Minnesota medicine</i> . 2012;95(11):37-39. | Partially  | Authors have authority, relevant references included. Journal not peer-reviewed          | Yes        | Clear aim that is fulfilled, no method supplied           | Yes        | Focus on United States of America health system | Yes         | Author bias not explicitly stated, but standpoint is balanced | Yes        | Context of article identifiable. Key contemporary references included | Yes          | Recognises the importance of the triple aim in healthcare sustainability |
| McGorry PD, Hamilton MP. Stepwise expansion of evidence-based care is needed for mental health reform. <i>The Medical</i>                | Yes        | Authors have authority, relevant references included. Published in peer-reviewed journal | Yes        | Brief well defined and adhered to. No methodology present | Yes        | focus on Australia and the mental health sector | Yes         | Author bias not explicitly stated, but standpoint is balanced | Yes        | Context of article identifiable. Key contemporary references included | Yes          | Recognises the challenges in the system of                               |

| Reference                                                                                                                                                   | Authority  |                                                                                          | Accuracy   |                                                                                     | Coverage   |                                                                                                  | Objectivity |                                                               | Date       |                                                                       | Significance |                                                                  |
|-------------------------------------------------------------------------------------------------------------------------------------------------------------|------------|------------------------------------------------------------------------------------------|------------|-------------------------------------------------------------------------------------|------------|--------------------------------------------------------------------------------------------------|-------------|---------------------------------------------------------------|------------|-----------------------------------------------------------------------|--------------|------------------------------------------------------------------|
|                                                                                                                                                             | Yes or no? | Comment                                                                                  | Yes or no? | Comment                                                                             | Yes or no? | Comment                                                                                          | Yes or no?  | Comment                                                       | Yes or no? | Comment                                                               | Yes or no?   | Comment                                                          |
| <i>journal of Australia.</i><br>2016;204(9):351-353.                                                                                                        |            |                                                                                          |            |                                                                                     |            |                                                                                                  |             |                                                               |            |                                                                       |              |                                                                  |
| McIntosh E, Nagelkerk J, Vonderheid SC, Poole M, Dontje K, Pohl JM. Financially viable nurse-managed centers. <i>Nurse Pract.</i> 2003;28(3):40, 46-48, 51. | Yes        | Authors have authority, relevant references included. Published in peer-reviewed journal | Yes        | Aim not clear, but brief clear and examples used to explain argument. Peer reviewed | Yes        | Focus on the role of finance committees in nurse managed centres in the United States of America | Yes         | Author bias not explicitly stated, but standpoint is balanced | Yes        | Context of article identifiable. Key contemporary references included | Yes          | Important article on nurse managed centres and how they function |
| Nagle LM, Pitts BM. Citizen perspectives on the future of                                                                                                   | Partially  | Authors have authority, relevant references included.                                    | Yes        | Brief clearly stated and met. No methods provided                                   | Yes        | Focus on health system in Ontario, Canada                                                        | Yes         | Author bias not explicitly stated, but standpoint             | Yes        | Date is explicit (comments on the panel that met from                 | Yes          | Summarises the recommendations for sustainability from           |

| Reference                                                                                                                                                                                 | Authority  |                                                                                          | Accuracy   |                                                     | Coverage   |                                                                    | Objectivity |                                                                                                  | Date       |                                                                                                                                    | Significance |                                                                                                           |
|-------------------------------------------------------------------------------------------------------------------------------------------------------------------------------------------|------------|------------------------------------------------------------------------------------------|------------|-----------------------------------------------------|------------|--------------------------------------------------------------------|-------------|--------------------------------------------------------------------------------------------------|------------|------------------------------------------------------------------------------------------------------------------------------------|--------------|-----------------------------------------------------------------------------------------------------------|
|                                                                                                                                                                                           | Yes or no? | Comment                                                                                  | Yes or no? | Comment                                             | Yes or no? | Comment                                                            | Yes or no?  | Comment                                                                                          | Yes or no? | Comment                                                                                                                            | Yes or no?   | Comment                                                                                                   |
| healthcare. <i>Healthcare Quarterly</i> . 2012;15(2): 40-45.                                                                                                                              |            | Journal not peer-reviewed                                                                |            |                                                     |            |                                                                    |             | is balanced                                                                                      |            | April-June 2011). Contemporary references also included                                                                            |              | the unique panel of Ontarians                                                                             |
| Pacifico Silva H, Lehoux P, Miller FA, Denis JL. Introducing responsible innovation in health: a policy-oriented framework. <i>Health Research Policy &amp; Systems</i> . 2018;16(1): 90. | Yes        | Authors have authority, relevant references included. Published in peer-reviewed journal | Yes        | Research aim identified and met. No method provided | Yes        | Worldwide, with examples from the United States and European Union | Yes         | Author bias not explicitly stated, but bias of technologies being discussed is explicitly stated | Yes        | Context related to responsible research and innovation in health, and thus is centred on when the research on this topic increased | Yes          | Contributes responsible innovations in health framework, with nine dimensions organised into five domains |
| Pencheon D. Developing a                                                                                                                                                                  | Yes        | Authors have authority, relevant                                                         | Yes        | Brief clear and met, no method provided             | Yes        | England NHS context                                                | Yes         | Author bias not explicitly stated, but                                                           | Yes        | Context identified as the five years                                                                                               | Yes          | Important article highlighting ways in                                                                    |

1  
2  
3  
4  
5  
6  
7  
8  
9  
10  
11  
12  
13  
14  
15  
16  
17  
18  
19  
20  
21  
22  
23  
24  
25  
26  
27  
28  
29  
30  
31  
32  
33  
34  
35  
36  
37  
38  
39  
40  
41  
42  
43  
44  
45  
46  
47

| Reference                                                                                                                                           | Authority  |                                                                                          | Accuracy   |                                                                                      | Coverage   |                                                                | Objectivity |                                                                                                                                | Date       |                                                                                      | Significance |                                                                                                    |
|-----------------------------------------------------------------------------------------------------------------------------------------------------|------------|------------------------------------------------------------------------------------------|------------|--------------------------------------------------------------------------------------|------------|----------------------------------------------------------------|-------------|--------------------------------------------------------------------------------------------------------------------------------|------------|--------------------------------------------------------------------------------------|--------------|----------------------------------------------------------------------------------------------------|
|                                                                                                                                                     | Yes or no? | Comment                                                                                  | Yes or no? | Comment                                                                              | Yes or no? | Comment                                                        | Yes or no?  | Comment                                                                                                                        | Yes or no? | Comment                                                                              | Yes or no?   | Comment                                                                                            |
| sustainable health and care system: lessons for research and policy. <i>Journal of Health Services &amp; Research Policy</i> . 2013;18(4):193-194.  |            | references included. Published in peer-reviewed journal                                  |            |                                                                                      |            |                                                                |             | standpoint is balanced                                                                                                         |            | previous to publication in 2013 (where future-proofing the healthcare was attempted) |              | which the health system can be sustained                                                           |
| Pronovost, P. J., C. G. Holzmueller, T. Callender, R. Demski, L. Winner, R. Day, J. M. Austin, S. M. Berenholtz, and M. R. Miller. 2016. Sustaining | Yes        | Authors have authority, relevant references included. Published in peer-reviewed journal | Yes        | Aim not explicit, but article brief is provided. Methodology provided and adhered to | Yes        | Specific and well defined: Johns Hopkins Hospital in 2012-2014 | Yes         | Authors clear that they conducted previous research in measuring results of sustainability improvement measures (2012) and the | Yes        | Clear date acknowledged from 2012 (initial results) to 2013                          | Yes          | Suggests quality could improve through applying the framework used at Johns Hopkins Hospital (JHH) |

| Reference                                                                                                                                  | Authority  |                                                                                          | Accuracy   |                                                                                                     | Coverage   |                              | Objectivity |                                                                                                                                 | Date       |                                                                       | Significance |                                                                                                                 |
|--------------------------------------------------------------------------------------------------------------------------------------------|------------|------------------------------------------------------------------------------------------|------------|-----------------------------------------------------------------------------------------------------|------------|------------------------------|-------------|---------------------------------------------------------------------------------------------------------------------------------|------------|-----------------------------------------------------------------------|--------------|-----------------------------------------------------------------------------------------------------------------|
|                                                                                                                                            | Yes or no? | Comment                                                                                  | Yes or no? | Comment                                                                                             | Yes or no? | Comment                      | Yes or no?  | Comment                                                                                                                         | Yes or no? | Comment                                                               | Yes or no?   | Comment                                                                                                         |
| Reliability on Accountability Measures at The Johns Hopkins Hospital. Jt Comm J Qual Patient Saf 42 (2):51-60.                             |            |                                                                                          |            |                                                                                                     |            |                              |             | author's efforts to sustain them                                                                                                |            |                                                                       |              |                                                                                                                 |
| Robertson TM, Lofgren RP. Where population health misses the mark: breaking the 80/20 rule. <i>Academic Medicine</i> . 2015;90(3):277-278. | Yes        | Authors have authority, relevant references included. Published in peer-reviewed journal | Yes        | No aim, but brief clearly stated. Relevant references included. Published in peer reviewed journal. | Yes        | United States health context | Yes         | Bias not explicitly stated but states the aim to reduce healthcare spending through analysis of medical insurance claim records | Yes        | Context of article identifiable. Key contemporary references included | Yes          | Adds to the argument of the importance of identifying health spending and working on reducing it where possible |

1  
2  
3  
4  
5  
6  
7  
8  
9  
10  
11  
12  
13  
14  
15  
16  
17  
18  
19  
20  
21  
22  
23  
24  
25  
26  
27  
28  
29  
30  
31  
32  
33  
34  
35  
36  
37  
38  
39  
40  
41  
42  
43  
44  
45  
46  
47

| Reference                                                                                                                                                                                                           | Authority  |                                                                                          | Accuracy   |                                                                                                                         | Coverage   |                                 | Objectivity |                                                               | Date       |                                                                       | Significance |                                                                                  |
|---------------------------------------------------------------------------------------------------------------------------------------------------------------------------------------------------------------------|------------|------------------------------------------------------------------------------------------|------------|-------------------------------------------------------------------------------------------------------------------------|------------|---------------------------------|-------------|---------------------------------------------------------------|------------|-----------------------------------------------------------------------|--------------|----------------------------------------------------------------------------------|
|                                                                                                                                                                                                                     | Yes or no? | Comment                                                                                  | Yes or no? | Comment                                                                                                                 | Yes or no? | Comment                         | Yes or no?  | Comment                                                       | Yes or no? | Comment                                                               | Yes or no?   | Comment                                                                          |
| Rosenberg-Yunger ZR, Daar AS, Singer PA, Martin DK. Healthcare sustainability and the challenges of innovation to biopharmaceuticals in Canada. <i>Health policy (Amsterdam, Netherlands)</i> . 2008;87(3):359-368. | Yes        | Authors have authority, relevant references included. Published in peer-reviewed journal | Yes        | Clear brief comprising three parts to review government response to biopharmaceuticals and health system sustainability | Yes        | Focus on Canada health system   | Yes         | Author bias not explicitly stated, but standpoint is balanced | Yes        | Context of article identifiable. Key contemporary references included | Yes          | Contributes recommendations for the field regarding access to biopharmaceuticals |
| Rosser, M. 2006. Advancing health system                                                                                                                                                                            | Partially  | Authors have authority, but no                                                           | Yes        | Research aim identified and met                                                                                         | Yes        | Focus on Canadian health system | Yes         | Clear from the article even though bias is not                | Yes        | Context of article covers from 1997 (inception                        | Yes          | Significance evident in the "lessons                                             |



| Reference                                                                                                               | Authority  |                                                  | Accuracy   |                                                                                                                                                             | Coverage   |                                                                                                             | Objectivity |                                                                                   | Date       |                                                                       | Significance |                                                                                                                 |
|-------------------------------------------------------------------------------------------------------------------------|------------|--------------------------------------------------|------------|-------------------------------------------------------------------------------------------------------------------------------------------------------------|------------|-------------------------------------------------------------------------------------------------------------|-------------|-----------------------------------------------------------------------------------|------------|-----------------------------------------------------------------------|--------------|-----------------------------------------------------------------------------------------------------------------|
|                                                                                                                         | Yes or no? | Comment                                          | Yes or no? | Comment                                                                                                                                                     | Yes or no? | Comment                                                                                                     | Yes or no?  | Comment                                                                           | Yes or no? | Comment                                                               | Yes or no?   | Comment                                                                                                         |
| integration through supply chain improvement. Healthc Q 9 (1):62-66, 64.                                                |            | references included                              |            |                                                                                                                                                             |            |                                                                                                             |             | specifically mentioned that the stance of the article is that HMMS are beneficial |            | of HMMS) and 2006 (article publication). No references included       |              | learned" section                                                                                                |
| Scott IA. Is modern medicine at risk of losing the plot? <i>The Medical journal of Australia</i> . 2006;185(4):213-216. | Yes        | Authors have authority, journal is peer-reviewed | Yes        | Examines if pledges by Australian Government for improvements to healthcare are sustainable financially, and in terms of behaviour change on the front line | Yes        | Specific to Australian population healthcare spending, and the private health insurance system of Australia | Yes         | Clear opinion but well balanced argument                                          | Yes        | Context of article identifiable. Key contemporary references included | Yes          | Relevant, adds context to Australian health. Encourages different aspects of the health system to work together |

1  
2  
3  
4  
5  
6  
7  
8  
9  
10  
11  
12  
13  
14  
15  
16  
17  
18  
19  
20  
21  
22  
23  
24  
25  
26  
27  
28  
29  
30  
31  
32  
33  
34  
35  
36  
37  
38  
39  
40  
41  
42  
43  
44  
45  
46  
47

| Reference                                                                                                                                               | Authority  |                                                                                          | Accuracy   |                                                 | Coverage   |                                                          | Objectivity |                                                                                                              | Date       |                                                                       | Significance |                                                                                                                      |
|---------------------------------------------------------------------------------------------------------------------------------------------------------|------------|------------------------------------------------------------------------------------------|------------|-------------------------------------------------|------------|----------------------------------------------------------|-------------|--------------------------------------------------------------------------------------------------------------|------------|-----------------------------------------------------------------------|--------------|----------------------------------------------------------------------------------------------------------------------|
|                                                                                                                                                         | Yes or no? | Comment                                                                                  | Yes or no? | Comment                                         | Yes or no? | Comment                                                  | Yes or no?  | Comment                                                                                                      | Yes or no? | Comment                                                               | Yes or no?   | Comment                                                                                                              |
| Sepehri A, Chernomas R. Is the Canadian health care system fiscally sustainable? <i>International Journal of Health Services</i> . 2004;34(2): 229-243. | Yes        | Authors have authority, relevant references included. Published in peer-reviewed journal | Yes        | Brief clearly described and met. No methodology | Yes        | Specific to Canadian context                             | Yes         | Contains well balanced review of literature, and compares the health systems of Canada and the United States | Yes        | Context of article identifiable. Key contemporary references included | Yes          | Argued for the best way to increase the sustainability and economic viability of the national Canadian health system |
| Shigayeva A, Coker RJ. Communicable disease control programmes and health systems: an analytical approach to sustainability                             | Yes        | Authors have authority, relevant references included. Published in peer-reviewed journal | Yes        | Aim clearly stated and met. No methodology      | Yes        | Worldwide context, but focus on disease control programs | Yes         | Author bias not explicitly stated, but standpoint is balanced                                                | Yes        | Context of article identifiable. Key contemporary references included | Yes          | Important article that proposes characteristics and a framework that may have the potential for sustainability       |

| Reference                                                                                                                                                                           | Authority  |                                                                                          | Accuracy   |                                                                                     | Coverage   |                                                 | Objectivity |                                                                                                                 | Date       |                                                                       | Significance |                                                                     |
|-------------------------------------------------------------------------------------------------------------------------------------------------------------------------------------|------------|------------------------------------------------------------------------------------------|------------|-------------------------------------------------------------------------------------|------------|-------------------------------------------------|-------------|-----------------------------------------------------------------------------------------------------------------|------------|-----------------------------------------------------------------------|--------------|---------------------------------------------------------------------|
|                                                                                                                                                                                     | Yes or no? | Comment                                                                                  | Yes or no? | Comment                                                                             | Yes or no? | Comment                                         | Yes or no?  | Comment                                                                                                         | Yes or no? | Comment                                                               | Yes or no?   | Comment                                                             |
| ty. <i>Health policy and planning</i> . 2015;30(3): 368-385.                                                                                                                        |            |                                                                                          |            |                                                                                     |            |                                                 |             |                                                                                                                 |            |                                                                       |              |                                                                     |
| Sonnenreich P, Geisler L. Covering the Cost of the Cure: From Hepatitis C to Cancer, New Therapies Are Straining a System Plagued by Inefficiency. <i>PT</i> . 2016;41(9): 565-589. | Yes        | Authors have authority, relevant references included. Published in peer-reviewed journal | Yes        | Aim not clear, but brief clear and examples used to explain argument. Peer reviewed | Yes        | Focus on United States of America health system | Yes         | Author bias not explicitly stated, but standpoint is balanced with research from other researchers and articles | Yes        | Context of article identifiable. Key contemporary references included | Yes          | Examines the evolving notions of value in healthcare, cost vs cure, |
| Stoelwinder JU, Paolucci F. Sustaining Medicare                                                                                                                                     | Yes        | Authors have authority, relevant references                                              | Yes        | Brief clear and met, peer reviewed                                                  | Yes        | Focus on how Australia can learn from the       | Yes         | Author bias not explicitly stated, but standpoint                                                               | Yes        | Context of article identifiable as contempor                          | Yes          | Extracts the application to Australia                               |

1  
2  
3  
4  
5  
6  
7  
8  
9  
10  
11  
12  
13  
14  
15  
16  
17  
18  
19  
20  
21  
22  
23  
24  
25  
26  
27  
28  
29  
30  
31  
32  
33  
34  
35  
36  
37  
38  
39  
40  
41  
42  
43  
44  
45  
46  
47

| Reference                                                                                                                                                      | Authority  |                                                                                          | Accuracy   |                                         | Coverage   |                                      | Objectivity |                                                                                                                                                 | Date       |                                                                                                                                                   | Significance |                                                               |
|----------------------------------------------------------------------------------------------------------------------------------------------------------------|------------|------------------------------------------------------------------------------------------|------------|-----------------------------------------|------------|--------------------------------------|-------------|-------------------------------------------------------------------------------------------------------------------------------------------------|------------|---------------------------------------------------------------------------------------------------------------------------------------------------|--------------|---------------------------------------------------------------|
|                                                                                                                                                                | Yes or no? | Comment                                                                                  | Yes or no? | Comment                                 | Yes or no? | Comment                              | Yes or no?  | Comment                                                                                                                                         | Yes or no? | Comment                                                                                                                                           | Yes or no?   | Comment                                                       |
| through consumer choice of health funds: lessons from the Netherlands. <i>Medical Journal of Australia</i> . 2009;191(1):30-32.                                |            | included. Published in peer-reviewed journal                                             |            |                                         |            | Netherlands health system            |             | is balanced. Authors are affiliated with Australian institutions                                                                                |            | ary. Key contemporary references included                                                                                                         |              | of the Netherlands policies.                                  |
| Stoelwinder JU. Final report of the National Health and Hospitals Reform Commission: will we get the health care governance reform we need? <i>The Medical</i> | Yes        | Authors have authority, relevant references included. Published in peer-reviewed journal | Yes        | Brief clear and met, no method provided | Yes        | Specific to Australian health system | Yes         | Author bias not explicitly stated, but standpoint is balanced. Also of note, author declares conflict of interest as they are a board member of | Yes        | Context of article identifiable and there is explicit reference to the actions of the National Health and Hospitals Reform Commission and federal | Yes          | Timely article suggesting changes to Australian health system |

| Reference                                                                                                                                                | Authority  |                                                                                 | Accuracy   |                                                        | Coverage   |                                         | Objectivity |                                                                                                                                 | Date       |                                                                       | Significance |                                                                                       |
|----------------------------------------------------------------------------------------------------------------------------------------------------------|------------|---------------------------------------------------------------------------------|------------|--------------------------------------------------------|------------|-----------------------------------------|-------------|---------------------------------------------------------------------------------------------------------------------------------|------------|-----------------------------------------------------------------------|--------------|---------------------------------------------------------------------------------------|
|                                                                                                                                                          | Yes or no? | Comment                                                                         | Yes or no? | Comment                                                | Yes or no? | Comment                                 | Yes or no?  | Comment                                                                                                                         | Yes or no? | Comment                                                               | Yes or no?   | Comment                                                                               |
| <i>journal of Australia.</i> 2009;191(7):387-388.                                                                                                        |            |                                                                                 |            |                                                        |            |                                         |             | Medibank Private                                                                                                                |            | government response. Key contemporary references included             |              |                                                                                       |
| Stuart N, Adams J. 2007. The sustainability of Canada's healthcare system: a framework for advancing the debate. <i>Healthcare Quarterly</i> 10: 96–103. | Partially  | Authors have authority, relevant references included. Journal not peer-reviewed | Yes        | Brief clear and met, no method provided, peer-reviewed | Yes        | Focus on Canadian healthcare            | Yes         | Author bias not explicitly stated, but standpoint is balanced and bias within the healthcare system is identified and discussed | Yes        | Context of article identifiable. Key contemporary references included | Yes          | Examines the importance of improving the sustainability of the Canadian health system |
| Taylor M. Australian health care reform: a place for                                                                                                     | Partially  | Author information not available, journal not                                   | Yes        | Clear brief to discuss role of NPs in Australia        | Yes        | Focus on the role of nurse practitioner | Yes         | Author bias not explicitly stated, but standpoint                                                                               | Yes        | Context of article identifiable as after the 2010                     | Yes          | Recognises and emphasises the emerging                                                |

1  
2  
3  
4  
5  
6  
7  
8  
9  
10  
11  
12  
13  
14  
15  
16  
17  
18  
19  
20  
21  
22  
23  
24  
25  
26  
27  
28  
29  
30  
31  
32  
33  
34  
35  
36  
37  
38  
39  
40  
41  
42  
43  
44  
45  
46  
47

| Reference                                                                                                                              | Authority  |                                                                                                           | Accuracy   |                                                                                                    | Coverage   |                                           | Objectivity |                                                                                                          | Date       |                                                                                  | Significance |                                                                                                     |
|----------------------------------------------------------------------------------------------------------------------------------------|------------|-----------------------------------------------------------------------------------------------------------|------------|----------------------------------------------------------------------------------------------------|------------|-------------------------------------------|-------------|----------------------------------------------------------------------------------------------------------|------------|----------------------------------------------------------------------------------|--------------|-----------------------------------------------------------------------------------------------------|
|                                                                                                                                        | Yes or no? | Comment                                                                                                   | Yes or no? | Comment                                                                                            | Yes or no? | Comment                                   | Yes or no?  | Comment                                                                                                  | Yes or no? | Comment                                                                          | Yes or no?   | Comment                                                                                             |
| nurse practitioners? Aust Nurs J. 2007;15(6):20-23.                                                                                    |            | peer-reviewed. However, relevant and peer-reviewed references are included                                |            | and how the role can be sustainable                                                                |            | rs in Australia                           |             | is justified by numerous government reports                                                              |            | Patient Protection and Affordable Care Act. Key contemporary references included |              | role of the nurse practitioner, and how it can be sustained                                         |
| Thompson RE. Sustainability as the lynch pin of public policy and industry initiatives. <i>Physician executive</i> . 1998;24(4):52-55. | Partially  | Authors are associated with reputable organisations in their field. However, journal is not peer-reviewed | Partially  | No clearly stated brief, starts with USA health political history and then to discuss managed care | Yes        | American population health                | Partially   | Authors standpoint is clear in their argument. However, it is not particularly balanced in presentation. | Partially  | Context of article identifiable. Majority of references are not contemporary     | Yes          | Promotes discussion regarding healthcare in the USA, and if and how managed care can be sustainable |
| Tsasis P. Chronic disease management and the home-care                                                                                 | Yes        | Authors have authority, relevant references included.                                                     | Yes        | Brief clear and met, no method provided                                                            | Yes        | Focus on health system in Ontario, Canada | Yes         | Author bias not explicitly stated, but standpoint                                                        | Yes        | Context of article identifiable. Key contemporary                                | Yes          | Important article, justified in terms of health of Canadians                                        |

| Reference                                                                                                                                                                                                 | Authority  |                                                                                          | Accuracy   |                                                                                                         | Coverage   |                                                          | Objectivity |                                                                                           | Date       |                                                                                                                  | Significance |                                                                                                                             |
|-----------------------------------------------------------------------------------------------------------------------------------------------------------------------------------------------------------|------------|------------------------------------------------------------------------------------------|------------|---------------------------------------------------------------------------------------------------------|------------|----------------------------------------------------------|-------------|-------------------------------------------------------------------------------------------|------------|------------------------------------------------------------------------------------------------------------------|--------------|-----------------------------------------------------------------------------------------------------------------------------|
|                                                                                                                                                                                                           | Yes or no? | Comment                                                                                  | Yes or no? | Comment                                                                                                 | Yes or no? | Comment                                                  | Yes or no?  | Comment                                                                                   | Yes or no? | Comment                                                                                                          | Yes or no?   | Comment                                                                                                                     |
| alternative in Ontario, Canada. Health Serv Manage Res. 2009;22(3):136-139.                                                                                                                               |            | Published in peer-reviewed journal                                                       |            |                                                                                                         |            |                                                          |             | is balanced                                                                               |            | references included                                                                                              |              | , and financial improvement                                                                                                 |
| Van de Pas R, Hill PS, Hammonds R, et al. Global health governance in the sustainable development goals: Is it grounded in the right to health? <i>Global challenges (Hoboken, NJ)</i> . 2017;1(1):47-60. | Yes        | Authors have authority, relevant references included. Published in peer-reviewed journal | Yes        | Clear brief regarding analysis of the roots of the sustainable development goals in the right to health | Yes        | Worldwide, focusing on the sustainable development goals | Yes         | Author bias not explicitly stated, but standpoint is balanced and urban bias is discussed | Yes        | Context of article identifiable as post-2015 sustainable development goals. Key contemporary references included | Yes          | Unique argument, questions if the sustainable development goals satisfy the right to health, and concludes that they do not |

1  
2  
3  
4  
5  
6  
7  
8  
9  
10  
11  
12  
13  
14  
15  
16  
17  
18  
19  
20  
21  
22  
23  
24  
25  
26  
27  
28  
29  
30  
31  
32  
33  
34  
35  
36  
37  
38  
39  
40  
41  
42  
43  
44  
45  
46  
47

| Reference                                                                                                                                                              | Authority  |                                                                                          | Accuracy   |                                                                                                    | Coverage   |                                                                                          | Objectivity |                                                                                                                  | Date       |                                                                       | Significance |                                                                                        |
|------------------------------------------------------------------------------------------------------------------------------------------------------------------------|------------|------------------------------------------------------------------------------------------|------------|----------------------------------------------------------------------------------------------------|------------|------------------------------------------------------------------------------------------|-------------|------------------------------------------------------------------------------------------------------------------|------------|-----------------------------------------------------------------------|--------------|----------------------------------------------------------------------------------------|
|                                                                                                                                                                        | Yes or no? | Comment                                                                                  | Yes or no? | Comment                                                                                            | Yes or no? | Comment                                                                                  | Yes or no?  | Comment                                                                                                          | Yes or no? | Comment                                                               | Yes or no?   | Comment                                                                                |
| Veillard J, Denny K. Transformation through Clinical and Social Integration: Meeting the Needs of High Users of Healthcare. <i>Healthcare Papers</i> . 2014;14(2):4-7. | Yes        | Authors have authority, relevant references included. Published in peer-reviewed journal | Yes        | Clear brief in observations regarding the use of the health system by a minority of the population | Yes        | Focus on Canadian health system, especially Ontario, but message is applicable worldwide | Yes         | Author bias not explicitly stated, but standpoint is well balanced with arguments on many perspectives discussed | Yes        | Context of article identifiable. Key contemporary references included | Yes          | Argues five points regarding Ontario's health system and the potential for improvement |
| Wakerman J, Humphreys JS. Sustainable workforce and sustainable health systems for rural and remote                                                                    | Yes        | Authors have authority, relevant references included. Published in peer-reviewed journal | Yes        | Brief clear and met, no method provided                                                            | Yes        | Specific to rural and remote Australia                                                   | Yes         | Author bias not explicitly stated, but standpoint is balanced                                                    | Yes        | Context of article identifiable. Key contemporary references included | Yes          | Recognises interdependence of the health system of urban and rural areas               |



| Reference                                                                                                                                                                                   | Authority  |                                                                                          | Accuracy   |                                                              | Coverage   |                                                                                          | Objectivity |                                                                 | Date       |                                                                       | Significance |                                                                  |
|---------------------------------------------------------------------------------------------------------------------------------------------------------------------------------------------|------------|------------------------------------------------------------------------------------------|------------|--------------------------------------------------------------|------------|------------------------------------------------------------------------------------------|-------------|-----------------------------------------------------------------|------------|-----------------------------------------------------------------------|--------------|------------------------------------------------------------------|
|                                                                                                                                                                                             | Yes or no? | Comment                                                                                  | Yes or no? | Comment                                                      | Yes or no? | Comment                                                                                  | Yes or no?  | Comment                                                         | Yes or no? | Comment                                                               | Yes or no?   | Comment                                                          |
| Australia. <i>The Medical journal of Australia</i> . 2013;199(5 Suppl):S14-17.                                                                                                              |            |                                                                                          |            |                                                              |            |                                                                                          |             |                                                                 |            |                                                                       |              |                                                                  |
| Woodward, G. L., A. Iverson, R. Harvey, and P. G. Blake. 2015. Implementation of an agency to improve chronic kidney disease care in Ontario: lessons learned by the Ontario Renal Network. | Yes        | Authors have authority, relevant references included. Published in peer-reviewed journal | Yes        | The aim is adhered to, but there is no relevant methodology. | Yes        | Limits of article known (to identify lessons learnt from the CKD agency to improve care) | Yes         | Argument that the CKD system has been effective and sustainable | Yes        | Context of article identifiable. Key contemporary references included | Yes          | Identifies methods used for improving CKD care and their success |

1  
2  
3  
4  
5  
6  
7  
8  
9  
10  
11  
12  
13  
14  
15  
16  
17  
18  
19  
20  
21  
22  
23  
24  
25  
26  
27  
28  
29  
30  
31  
32  
33  
34  
35  
36  
37  
38  
39  
40  
41  
42  
43  
44  
45  
46  
47

| Reference                                                                                                                                                             | Authority  |                                         | Accuracy   |                                          | Coverage   |                                         | Objectivity |                            | Date       |                            | Significance |         |
|-----------------------------------------------------------------------------------------------------------------------------------------------------------------------|------------|-----------------------------------------|------------|------------------------------------------|------------|-----------------------------------------|-------------|----------------------------|------------|----------------------------|--------------|---------|
|                                                                                                                                                                       | Yes or no? | Comment                                 | Yes or no? | Comment                                  | Yes or no? | Comment                                 | Yes or no?  | Comment                    | Yes or no? | Comment                    | Yes or no?   | Comment |
| Healthc Q 17 Spec No:44-47.                                                                                                                                           |            |                                         |            |                                          |            |                                         |             |                            |            |                            |              |         |
| Pisco L, Pinto LF. From Alma-Ata to Astana: the path of Primary Health Care in Portugal, 1978-2018 and the genesis of Family Medicine. Ciencia & saude coletiva. 2020 | Yes        | All authors from reputable institutions |            | Peer reviewed, but no aim or methodology | Yes        | Portugal only                           | Yes         |                            | Yes        | Recent references included | Yes          |         |
| Ganann R, Peacock S, Garnett A, et al.                                                                                                                                | Yes        | All authors from reputable              | Yes        | Clear aim and adhered to                 | Yes        | Context clearly stated and clear limits | Yes         | Bias not explicitly stated | Yes        | Recent references included | Yes          |         |

| Reference                                                                                                                                                                                       | Authority  |              | Accuracy   |         | Coverage   |         | Objectivity |         | Date       |         | Significance |         |
|-------------------------------------------------------------------------------------------------------------------------------------------------------------------------------------------------|------------|--------------|------------|---------|------------|---------|-------------|---------|------------|---------|--------------|---------|
|                                                                                                                                                                                                 | Yes or no? | Comment      | Yes or no? | Comment | Yes or no? | Comment | Yes or no?  | Comment | Yes or no? | Comment | Yes or no?   | Comment |
| Capacity development among academic trainees in community-based primary health care research: The Aging, Community and Health Research Unit Experience. Prim Health Care Res Dev. 2019;20:e139. |            | institutions |            |         |            |         |             |         |            |         |              |         |
| Jessup RL, O'Connor DA,                                                                                                                                                                         | Yes        |              | Yes        |         | Yes        |         | Yes         |         | Yes        |         | Yes          |         |

For peer review only

1  
2  
3  
4  
5  
6  
7  
8  
9  
10  
11  
12  
13  
14  
15  
16  
17  
18  
19  
20  
21  
22  
23  
24  
25  
26  
27  
28  
29  
30  
31  
32  
33  
34  
35  
36  
37  
38  
39  
40  
41  
42  
43  
44  
45  
46  
47

1  
2  
3  
4  
5  
6  
7  
8  
9  
10  
11  
12  
13  
14  
15  
16  
17  
18  
19  
20  
21  
22  
23  
24  
25  
26  
27  
28  
29  
30  
31  
32  
33  
34  
35  
36  
37  
38  
39  
40  
41  
42  
43  
44  
45  
46  
47

| Reference                                                                                                                                                                       | Authority  |                                         | Accuracy   |         | Coverage   |                          | Objectivity |         | Date       |                            | Significance |         |
|---------------------------------------------------------------------------------------------------------------------------------------------------------------------------------|------------|-----------------------------------------|------------|---------|------------|--------------------------|-------------|---------|------------|----------------------------|--------------|---------|
|                                                                                                                                                                                 | Yes or no? | Comment                                 | Yes or no? | Comment | Yes or no? | Comment                  | Yes or no?  | Comment | Yes or no? | Comment                    | Yes or no?   | Comment |
| Putrik P, et al. Alternative service models for delivery of healthcare services in high-income countries: a scoping review of systematic reviews. BMJ open. 2019;9(1): e024385. |            |                                         |            |         |            |                          |             |         |            |                            |              |         |
| Vainieri M, Noto G, Ferre F, Rosella LC. A Performance Managem                                                                                                                  | Yes        | All authors from reputable institutions | Yes        |         | Yes        | Explicitly mentions bias | Yes         |         | Yes        | Recent references included | Yes          |         |

For peer review only

| Reference                                                                                                                                                                                                | Authority  |                                                                            | Accuracy   |                     | Coverage   |                                       | Objectivity |         | Date       |                            | Significance |                                                   |
|----------------------------------------------------------------------------------------------------------------------------------------------------------------------------------------------------------|------------|----------------------------------------------------------------------------|------------|---------------------|------------|---------------------------------------|-------------|---------|------------|----------------------------|--------------|---------------------------------------------------|
|                                                                                                                                                                                                          | Yes or no? | Comment                                                                    | Yes or no? | Comment             | Yes or no? | Comment                               | Yes or no?  | Comment | Yes or no? | Comment                    | Yes or no?   | Comment                                           |
| ent<br>System in<br>Healthcar<br>e for All<br>Seasons?<br>Internatio<br>nal<br>Journal of<br>Environm<br>ental<br>Research<br>& Public<br>Health<br>[Electroni<br>c<br>Resource]<br>. 2020;17(1<br>5):03 |            |                                                                            |            |                     |            |                                       |             |         |            |                            |              |                                                   |
| Braithwait<br>e J,<br>Mannion<br>R,<br>Matsuyam<br>a Y, et al.<br>The future<br>of health<br>systems to<br>2030: a                                                                                       | Yes        | All authors from reputable institutions and published extensively in field | Yes        | Relevant references | Yes        | Includes information on 152 countries | Yes         |         | Yes        | Recent references included | Yes          | Adds meaningfully and enriches current literature |

1  
2  
3  
4  
5  
6  
7  
8  
9  
10  
11  
12  
13  
14  
15  
16  
17  
18  
19  
20  
21  
22  
23  
24  
25  
26  
27  
28  
29  
30  
31  
32  
33  
34  
35  
36  
37  
38  
39  
40  
41  
42  
43  
44  
45  
46  
47

| Reference                                                                                                                                                                               | Authority  |                            | Accuracy   |         | Coverage   |         | Objectivity |                                  | Date       |                            | Significance |         |
|-----------------------------------------------------------------------------------------------------------------------------------------------------------------------------------------|------------|----------------------------|------------|---------|------------|---------|-------------|----------------------------------|------------|----------------------------|--------------|---------|
|                                                                                                                                                                                         | Yes or no? | Comment                    | Yes or no? | Comment | Yes or no? | Comment | Yes or no?  | Comment                          | Yes or no? | Comment                    | Yes or no?   | Comment |
| roadmap for global progress and sustainability. International journal for quality in health care: journal of the International Society for Quality in Health Care. 2018;30(10):823-831. |            |                            |            |         |            |         |             |                                  |            |                            |              |         |
| Buttigieg SC. Innovation Strategies                                                                                                                                                     | Yes        | All authors from reputable | Yes        |         | Yes        |         | Yes         | Notes need to address contextual | Yes        | Recent references included | Yes          |         |

For peer review only

1  
2  
3  
4  
5  
6  
7  
8  
9  
10  
11  
12  
13  
14  
15  
16  
17  
18  
19  
20  
21  
22  
23  
24  
25  
26  
27  
28  
29  
30  
31  
32  
33  
34  
35  
36  
37  
38  
39  
40  
41  
42  
43  
44  
45  
46  
47

| Reference                                                                                                                                                                                                         | Authority  |               | Accuracy   |         | Coverage   |         | Objectivity |              | Date       |         | Significance |         |
|-------------------------------------------------------------------------------------------------------------------------------------------------------------------------------------------------------------------|------------|---------------|------------|---------|------------|---------|-------------|--------------|------------|---------|--------------|---------|
|                                                                                                                                                                                                                   | Yes or no? | Comment       | Yes or no? | Comment | Yes or no? | Comment | Yes or no?  | Comment      | Yes or no? | Comment | Yes or no?   | Comment |
| and Health System Guiding Principles to Address Equity and Sustainability in Responsible Innovation in Health Comment on "What Health System Challenges Should Responsible Innovation in Health Address? Insights |            | institution s |            |         |            |         |             | difference s |            |         |              |         |

For peer review only

1  
2  
3  
4  
5  
6  
7  
8  
9  
10  
11  
12  
13  
14  
15  
16  
17  
18  
19  
20  
21  
22  
23  
24  
25  
26  
27  
28  
29  
30  
31  
32  
33  
34  
35  
36  
37  
38  
39  
40  
41  
42  
43  
44  
45  
46  
47

| Reference                                                                                                                                                                     | Authority  |                                                   | Accuracy   |                            | Coverage   |                                 | Objectivity |                     | Date       |                                           | Significance |                                                   |
|-------------------------------------------------------------------------------------------------------------------------------------------------------------------------------|------------|---------------------------------------------------|------------|----------------------------|------------|---------------------------------|-------------|---------------------|------------|-------------------------------------------|--------------|---------------------------------------------------|
|                                                                                                                                                                               | Yes or no? | Comment                                           | Yes or no? | Comment                    | Yes or no? | Comment                         | Yes or no?  | Comment             | Yes or no? | Comment                                   | Yes or no?   | Comment                                           |
| From an International Scoping Review". Int. 2019;8(9): 570-572                                                                                                                |            |                                                   |            |                            |            |                                 |             |                     |            |                                           |              |                                                   |
| Byskov J, Maluka S, Marchal B, et al. A systems perspective on the importance of global health strategy developments for accomplishing today's Sustainable Development Goals. | Yes        | All authors from reputable institutions worldwide | Yes        | Aim clearly stated and met | Yes        | Coverage based on aim being met | Yes         | Balanced standpoint | Yes        | Relevant contemporary references included | Yes          | Brings suggested ways forward to achieve the SDGs |



| Reference                                                                                                                                                                                      | Authority  |                                                            | Accuracy   |                                         | Coverage   |                                           | Objectivity |                                                                                            | Date       |                                  | Significance |                        |
|------------------------------------------------------------------------------------------------------------------------------------------------------------------------------------------------|------------|------------------------------------------------------------|------------|-----------------------------------------|------------|-------------------------------------------|-------------|--------------------------------------------------------------------------------------------|------------|----------------------------------|--------------|------------------------|
|                                                                                                                                                                                                | Yes or no? | Comment                                                    | Yes or no? | Comment                                 | Yes or no? | Comment                                   | Yes or no?  | Comment                                                                                    | Yes or no? | Comment                          | Yes or no?   | Comment                |
| Health policy and planning. 2019;34(9):635-645.                                                                                                                                                |            |                                                            |            |                                         |            |                                           |             |                                                                                            |            |                                  |              |                        |
| O'Brien N, Li R, Isaranuwatchai W, et al. How can we make better health decisions a Best Buy for all?: Commentary based on discussions at iDSI roundtable on 2 (nd) May 2019 London, UK. Gates | Yes        | All authors from reputable colleges, peer reviewed article | Yes        | Peer reviewed, authoritative references | Yes        | Covers health technology assessment (HTA) | Yes         | Bias not explicitly stated but balanced standpoint with WHO and country and local evidence | Yes        | Contemporary references included | Yes          | Adds to the literature |

1  
2  
3  
4  
5  
6  
7  
8  
9  
10  
11  
12  
13  
14  
15  
16  
17  
18  
19  
20  
21  
22  
23  
24  
25  
26  
27  
28  
29  
30  
31  
32  
33  
34  
35  
36  
37  
38  
39  
40  
41  
42  
43  
44  
45  
46  
47

| Reference                                                                                                                                                                                                     | Authority  |                                              | Accuracy   |                              | Coverage   |                                        | Objectivity |                                                                                            | Date       |                                  | Significance |                                                          |
|---------------------------------------------------------------------------------------------------------------------------------------------------------------------------------------------------------------|------------|----------------------------------------------|------------|------------------------------|------------|----------------------------------------|-------------|--------------------------------------------------------------------------------------------|------------|----------------------------------|--------------|----------------------------------------------------------|
|                                                                                                                                                                                                               | Yes or no? | Comment                                      | Yes or no? | Comment                      | Yes or no? | Comment                                | Yes or no?  | Comment                                                                                    | Yes or no? | Comment                          | Yes or no?   | Comment                                                  |
| open research. 2019;3:15 43.                                                                                                                                                                                  |            |                                              |            |                              |            |                                        |             |                                                                                            |            |                                  |              |                                                          |
| Hanney S, Kanya L, Pokhrel S, Jones T, Boaz A. WHO Health Evidence Network Synthesis Reports. What is the evidence on policies, interventions and tools for establishing and/or strengthening national health | Yes        | WHO authority, as well as individual authors | Yes        | Authoritative, clear aim met | Yes        | Scoping review parameters well defined | Yes         | Bias not explicitly stated but balanced standpoint with WHO and country and local evidence | Yes        | Contemporary references included | Yes          | Has considerations for policy analysis in many countries |

| Reference                                                                                                                    | Authority  |                                     | Accuracy   |                                                         | Coverage   |                                             | Objectivity |                                                                  | Date       |                                                    | Significance |                                      |
|------------------------------------------------------------------------------------------------------------------------------|------------|-------------------------------------|------------|---------------------------------------------------------|------------|---------------------------------------------|-------------|------------------------------------------------------------------|------------|----------------------------------------------------|--------------|--------------------------------------|
|                                                                                                                              | Yes or no? | Comment                             | Yes or no? | Comment                                                 | Yes or no? | Comment                                     | Yes or no?  | Comment                                                          | Yes or no? | Comment                                            | Yes or no?   | Comment                              |
| research systems and their effectiveness? Copenhagen: WHO Regional Office for Europe © World Health Organization 2020.; 2020 |            |                                     |            |                                                         |            |                                             |             |                                                                  |            |                                                    |              |                                      |
| Braithwaite J, Vincent C, Nicklin W, Amalberti R. Coping with more people with more illness. Part 2: new generation          | Yes        | Well published authors in the field | Yes        | Authoritative references in the field, aim strategy met | Yes        | Global, but strategy for ISQua well defined | Yes         | Balanced standpoint, evidence from sources from around the world | Yes        | Context well defined, contemporary references used | Yes          | Important paper adding to literature |

1  
2  
3  
4  
5  
6  
7  
8  
9  
10  
11  
12  
13  
14  
15  
16  
17  
18  
19  
20  
21  
22  
23  
24  
25  
26  
27  
28  
29  
30  
31  
32  
33  
34  
35  
36  
37  
38  
39  
40  
41  
42  
43  
44  
45  
46  
47

| Reference                                                                                                                                           | Authority  |                                     | Accuracy   |                          | Coverage   |                                  | Objectivity |                                                | Date       |                                                            | Significance |                                         |
|-----------------------------------------------------------------------------------------------------------------------------------------------------|------------|-------------------------------------|------------|--------------------------|------------|----------------------------------|-------------|------------------------------------------------|------------|------------------------------------------------------------|--------------|-----------------------------------------|
|                                                                                                                                                     | Yes or no? | Comment                             | Yes or no? | Comment                  | Yes or no? | Comment                          | Yes or no?  | Comment                                        | Yes or no? | Comment                                                    | Yes or no?   | Comment                                 |
| of standards for enabling healthcare system transformation and sustainability. International Journal for Quality in Health Care. 2019;31(2):159-163 |            |                                     |            |                          |            |                                  |             |                                                |            |                                                            |              |                                         |
| Braithwaite J, Zurynski Y, Ludlow K, Holt J, Augustsson H, Campbell M.                                                                              | Yes        | Well published authors in the field | Yes        | Authoritative references | Yes        | Global but well defined protocol | Yes         | Balanced standpoint, bias explicitly addressed | Yes        | Date to be used well defined, contemporary references used | Yes          | Significant and important for the field |

| Reference                                                                                                                                                                               | Authority  |                       | Accuracy   |                          | Coverage   |                       | Objectivity |                     | Date       |                                  | Significance |                                 |
|-----------------------------------------------------------------------------------------------------------------------------------------------------------------------------------------|------------|-----------------------|------------|--------------------------|------------|-----------------------|-------------|---------------------|------------|----------------------------------|--------------|---------------------------------|
|                                                                                                                                                                                         | Yes or no? | Comment               | Yes or no? | Comment                  | Yes or no? | Comment               | Yes or no?  | Comment             | Yes or no? | Comment                          | Yes or no?   | Comment                         |
| Towards sustainable healthcare system performance in the 21st century in high-income countries: a protocol for a systematic review of the grey literature. BMJ open. 2019;9(1): e025892 |            |                       |            |                          |            |                       |             |                     |            |                                  |              |                                 |
| Martiniuk AL, Colbran R, Ramsden R, et al. Capability                                                                                                                                   | Yes        | Authoritative authors | Yes        | Authoritative references | Yes        | Coverage well defined | Yes         | Balanced standpoint | Yes        | Contemporary references included | Yes          | Important and adds to the field |

1  
2  
3  
4  
5  
6  
7  
8  
9  
10  
11  
12  
13  
14  
15  
16  
17  
18  
19  
20  
21  
22  
23  
24  
25  
26  
27  
28  
29  
30  
31  
32  
33  
34  
35  
36  
37  
38  
39  
40  
41  
42  
43  
44  
45  
46  
47

| Reference                                                                                                                                                                               | Authority  |                               | Accuracy   |               | Coverage   |                                                      | Objectivity |                                                              | Date       |         | Significance |         |
|-----------------------------------------------------------------------------------------------------------------------------------------------------------------------------------------|------------|-------------------------------|------------|---------------|------------|------------------------------------------------------|-------------|--------------------------------------------------------------|------------|---------|--------------|---------|
|                                                                                                                                                                                         | Yes or no? | Comment                       | Yes or no? | Comment       | Yes or no? | Comment                                              | Yes or no?  | Comment                                                      | Yes or no? | Comment | Yes or no?   | Comment |
| ... what's in a word? Rural Doctors Network of New South Wales Australia is shifting to focus on the capability of rural health professionals. Rural and remote health. 2020;20(3):5633 |            |                               |            |               |            |                                                      |             |                                                              |            |         |              |         |
| Rudnicka E, Napierała P, Podfigurna A, Męczekal                                                                                                                                         | Yes        | Peer reviewed journal article | Yes        | Peer-reviewed | Yes        | Aimed to coverage global perspective and achieved it | Yes         | Authors standpoint is clear, relatively balance presentation | Yes        |         | Yes          |         |

For peer review only

| Reference                                                                                                                   | Authority  |                                                                  | Accuracy   |               | Coverage   |                              | Objectivity |                                             | Date       |                                                                         | Significance |         |
|-----------------------------------------------------------------------------------------------------------------------------|------------|------------------------------------------------------------------|------------|---------------|------------|------------------------------|-------------|---------------------------------------------|------------|-------------------------------------------------------------------------|--------------|---------|
|                                                                                                                             | Yes or no? | Comment                                                          | Yes or no? | Comment       | Yes or no? | Comment                      | Yes or no?  | Comment                                     | Yes or no? | Comment                                                                 | Yes or no?   | Comment |
| ski B, Smolarczyk R, Grymowicz M. The World Health Organization (WHO) approach to healthy ageing. Maturitas. 2020;139:6-11. |            |                                                                  |            |               |            |                              |             |                                             |            |                                                                         |              |         |
| Walsh K. Strengthening primary care: the role of e-learning. Educ. 2019;30(5):267-269.                                      | Yes        | Author has a strong publication record in peer reviewed journals | Yes        | Peer reviewed | Yes        |                              | Yes         | No bias stated but is a balanced commentary | Yes        | Contemporary references included, date is discernible by subject matter | Yes          |         |
| De Santis M. Integrated                                                                                                     | Yes        | Authors both appear to                                           | Yes        | Peer reviewed | Yes        | Looking at studies published | Yes         | No bias stated,                             | Yes        | Recent references included,                                             | Yes          |         |

1  
2  
3  
4  
5  
6  
7  
8  
9  
10  
11  
12  
13  
14  
15  
16  
17  
18  
19  
20  
21  
22  
23  
24  
25  
26  
27  
28  
29  
30  
31  
32  
33  
34  
35  
36  
37  
38  
39  
40  
41  
42  
43  
44  
45  
46  
47

| Reference                                                                                                                                | Authority  |                                                                                               | Accuracy   |                                                           | Coverage   |                                                                             | Objectivity |                                     | Date       |                                                    | Significance |         |
|------------------------------------------------------------------------------------------------------------------------------------------|------------|-----------------------------------------------------------------------------------------------|------------|-----------------------------------------------------------|------------|-----------------------------------------------------------------------------|-------------|-------------------------------------|------------|----------------------------------------------------|--------------|---------|
|                                                                                                                                          | Yes or no? | Comment                                                                                       | Yes or no? | Comment                                                   | Yes or no? | Comment                                                                     | Yes or no?  | Comment                             | Yes or no? | Comment                                            | Yes or no?   | Comment |
| care for healthcare sustainability for patients living with rare diseases. Annali dell'Istituto superiore di sanita. 2019;55(3):276-282. |            | have roles in prominent rare disease organisations in Europe                                  |            |                                                           |            | between 2000 and 2018. Search terms provided, both grey lit and PR included |             | standpoint is clear                 |            | date is discernible                                |              |         |
| Ferrelli RM, Fantini B, Taruscio D. Health systems sustainability for rare diseases. Preface. Annali dell'Istituto                       | Yes        | Authors either work for rare diseases network in Europe or in the ministry of health in Italy | Yes        | Book chapter-editors are all from reputable organisations | Yes        | Europe specific with focus on rare diseases                                 | Yes         | No bias stated, standpoint is clear | Yes        | Contemporary references, the context is very clear | Yes          |         |



| Reference                                                                                                                                                                                             | Authority  |                                                | Accuracy   |                               | Coverage   |                                                                                                 | Objectivity |                                                                        | Date       |                                                                           | Significance |         |
|-------------------------------------------------------------------------------------------------------------------------------------------------------------------------------------------------------|------------|------------------------------------------------|------------|-------------------------------|------------|-------------------------------------------------------------------------------------------------|-------------|------------------------------------------------------------------------|------------|---------------------------------------------------------------------------|--------------|---------|
|                                                                                                                                                                                                       | Yes or no? | Comment                                        | Yes or no? | Comment                       | Yes or no? | Comment                                                                                         | Yes or no?  | Comment                                                                | Yes or no? | Comment                                                                   | Yes or no?   | Comment |
| superiore di sanita. 2019;55(3):249-250.                                                                                                                                                              |            |                                                |            |                               |            |                                                                                                 |             |                                                                        |            |                                                                           |              |         |
| Steenhuis S, Struijs J, Koolman X, Ket J, E VDH. Unraveling the Complexity in the Design and Implementation of Bundled Payments: A Scoping Review of Key Elements From a Payer's Perspective. Milbank | Yes        | Authors have peer reviewed publication history | Yes        | Aim stated, clear methodology | Yes        | Limits stated in the methodology- review related to payment methods, relevant to OECD countries | Yes         | Authors address risk of bias, there is a balanced standpoint presented | Yes        | Contemporary references included, date is discernible throughout the text | Yes          |         |

1  
2  
3  
4  
5  
6  
7  
8  
9  
10  
11  
12  
13  
14  
15  
16  
17  
18  
19  
20  
21  
22  
23  
24  
25  
26  
27  
28  
29  
30  
31  
32  
33  
34  
35  
36  
37  
38  
39  
40  
41  
42  
43  
44  
45  
46  
47

| Reference                                                                                                                                                                                             | Authority  |                                                       | Accuracy   |                            | Coverage   |                          | Objectivity |                                                                                  | Date       |                                                | Significance |                                                               |
|-------------------------------------------------------------------------------------------------------------------------------------------------------------------------------------------------------|------------|-------------------------------------------------------|------------|----------------------------|------------|--------------------------|-------------|----------------------------------------------------------------------------------|------------|------------------------------------------------|--------------|---------------------------------------------------------------|
|                                                                                                                                                                                                       | Yes or no? | Comment                                               | Yes or no? | Comment                    | Yes or no? | Comment                  | Yes or no?  | Comment                                                                          | Yes or no? | Comment                                        | Yes or no?   | Comment                                                       |
| Quarterly. 2020;98(1):197-222.                                                                                                                                                                        |            |                                                       |            |                            |            |                          |             |                                                                                  |            |                                                |              |                                                               |
| Nikolić B. Applicability of European Union Competition Law to Health Care Providers: The Dividing Line between Economic and Noneconomic Activities. Journal of health politics, policy and law. 2020. | Yes        | Contemporary references, author from reputable source | Yes        | Aim clearly stated and met | Yes        | Clear coverage within EU | Yes         | Authors opinion is balanced by contemporary references and different standpoints | Yes        | Context clear, contemporary references present | Yes          | Important article that helps make the legal uncertainty clear |
| Niraula S. Strategizi                                                                                                                                                                                 | Yes        | Authoritative author,                                 | Yes        | Clearly stated             | Yes        | Coverage specific to     | Yes         | balanced standpoint                                                              | Yes        | Universal healthcare                           | Yes          | Adds context,                                                 |

| Reference                                                                                                                                                                              | Authority  |                              | Accuracy   |                                      | Coverage   |                                                  | Objectivity |                                   | Date       |                                                                                | Significance |                                                  |
|----------------------------------------------------------------------------------------------------------------------------------------------------------------------------------------|------------|------------------------------|------------|--------------------------------------|------------|--------------------------------------------------|-------------|-----------------------------------|------------|--------------------------------------------------------------------------------|--------------|--------------------------------------------------|
|                                                                                                                                                                                        | Yes or no? | Comment                      | Yes or no? | Comment                              | Yes or no? | Comment                                          | Yes or no?  | Comment                           | Yes or no? | Comment                                                                        | Yes or no?   | Comment                                          |
| ng health technology assessment for containment of cancer drug costs in a universal health care system: Case of the pan-Canadian Oncology Drug Review. Cancer. 2019;125(18):3100-3103. |            | detailed reference list      |            | brief, peer reviewed article         |            | Canadian oncology drug review                    |             |                                   |            | system in Canada since 1968, and has been deduced with contemporary references |              | important yet specific article                   |
| Wurcel V, Cicchetti A, Garrison L, et al.                                                                                                                                              | Yes        | Authors experts in the field | Yes        | Peer-reviewed article, clear aim and | Yes        | Coverage specific to the VODI published articles | Yes         | Balanced standpoint with examples | Yes        | Contemporary references included,                                              | Yes          | Important addition regarding value of diagnostic |

1  
2  
3  
4  
5  
6  
7  
8  
9  
10  
11  
12  
13  
14  
15  
16  
17  
18  
19  
20  
21  
22  
23  
24  
25  
26  
27  
28  
29  
30  
31  
32  
33  
34  
35  
36  
37  
38  
39  
40  
41  
42  
43  
44  
45  
46  
47

| Reference                                                                                                                                                                                           | Authority  |         | Accuracy   |             | Coverage   |         | Objectivity |                | Date       |         | Significance |                    |
|-----------------------------------------------------------------------------------------------------------------------------------------------------------------------------------------------------|------------|---------|------------|-------------|------------|---------|-------------|----------------|------------|---------|--------------|--------------------|
|                                                                                                                                                                                                     | Yes or no? | Comment | Yes or no? | Comment     | Yes or no? | Comment | Yes or no?  | Comment        | Yes or no? | Comment | Yes or no?   | Comment            |
| The Value of Diagnostic Information in Personalised Healthcare: A Comprehensive Concept to Facilitate Bringing This Technology into Healthcare Systems. Public Health Genomics . 2019;22(1-2):8-15. |            |         |            | methodology |            |         |             | and references |            |         |              | information (VODI) |

For peer review only

| Reference                                                                                                                                                                       | Authority  |                                                         | Accuracy   |                                                                                | Coverage   |                                                                   | Objectivity |                                                                 | Date       |                                                          | Significance |                                                          |
|---------------------------------------------------------------------------------------------------------------------------------------------------------------------------------|------------|---------------------------------------------------------|------------|--------------------------------------------------------------------------------|------------|-------------------------------------------------------------------|-------------|-----------------------------------------------------------------|------------|----------------------------------------------------------|--------------|----------------------------------------------------------|
|                                                                                                                                                                                 | Yes or no? | Comment                                                 | Yes or no? | Comment                                                                        | Yes or no? | Comment                                                           | Yes or no?  | Comment                                                         | Yes or no? | Comment                                                  | Yes or no?   | Comment                                                  |
| Cunningham FC, Ranmuthugala G, Westbrook JJ, Braithwaite J. Tackling the wicked problem of health networks: the design of an evaluation framework. BMJ open. 2019;9(5):e024231. | Yes        | Authors authoritative in field, detailed reference list | Yes        | Clearly stated aim and methods adhered to. Work is representative of the field | Yes        | Evaluations of systematic reviews to date                         | Yes         | Balanced standpoint                                             | Yes        | Date discernible, contemporary references present        | Yes          | Meaningful contribution to literature                    |
| Embi PJ, Richesson R, Tenenbaum J, et al. Reimagining the                                                                                                                       | Yes        | Authoritative authors from well-respected institutions  | Yes        | Clear aim highlighted and met                                                  | Yes        | Specific to covering what was discussed and the findings from the | Yes         | Balanced standpoint with contributions from over 70 participant | Yes        | Discernible from references as well as timing of meeting | Yes          | Synthesised findings from meeting and adds to literature |

1  
2  
3  
4  
5  
6  
7  
8  
9  
10  
11  
12  
13  
14  
15  
16  
17  
18  
19  
20  
21  
22  
23  
24  
25  
26  
27  
28  
29  
30  
31  
32  
33  
34  
35  
36  
37  
38  
39  
40  
41  
42  
43  
44  
45  
46  
47

| Reference                                                                                                                                                   | Authority  |                       | Accuracy   |                       | Coverage   |                                                   | Objectivity |                                                                                        | Date       |                                                   | Significance |                                                        |
|-------------------------------------------------------------------------------------------------------------------------------------------------------------|------------|-----------------------|------------|-----------------------|------------|---------------------------------------------------|-------------|----------------------------------------------------------------------------------------|------------|---------------------------------------------------|--------------|--------------------------------------------------------|
|                                                                                                                                                             | Yes or no? | Comment               | Yes or no? | Comment               | Yes or no? | Comment                                           | Yes or no?  | Comment                                                                                | Yes or no? | Comment                                           | Yes or no?   | Comment                                                |
| research-practice relationship: policy recommendations for informatics-enabled evidence-generation across the US health system. JAMIA open. 2019;2(1): 2-9. |            |                       |            |                       |            | 2016 AMIA meeting                                 |             | s at meeting                                                                           |            | reported on                                       |              |                                                        |
| Park YL, Canaway R. Integrating Traditional and Complementary Medicine with                                                                                 | Yes        | Authoritative authors | Yes        | Peer reviewed journal | Yes        | limits clearly stated with Western Pacific region | Yes         | Bias not explicitly stated, but expert balanced standpoint drawing on experiences from | Yes        | Date discernible, contemporary references present | Yes          | Interesting and unique article, adds to the literature |

| Reference                                                                                                                 | Authority  |                                                                 | Accuracy   |                                                                                                                       | Coverage   |                     | Objectivity |                                                                                    | Date       |                                                                                          | Significance |                                                          |
|---------------------------------------------------------------------------------------------------------------------------|------------|-----------------------------------------------------------------|------------|-----------------------------------------------------------------------------------------------------------------------|------------|---------------------|-------------|------------------------------------------------------------------------------------|------------|------------------------------------------------------------------------------------------|--------------|----------------------------------------------------------|
|                                                                                                                           | Yes or no? | Comment                                                         | Yes or no? | Comment                                                                                                               | Yes or no? | Comment             | Yes or no?  | Comment                                                                            | Yes or no? | Comment                                                                                  | Yes or no?   | Comment                                                  |
| National Healthcare Systems for Universal Health Coverage in Asia and the Western Pacific. Health syst. 2019;5(1): 24-31. |            |                                                                 |            |                                                                                                                       |            |                     |             | many countries                                                                     |            |                                                                                          |              |                                                          |
| Quaglio G, Figueras J, Mantoan D, et al. An overview of future EU health systems. An insight into governanc               | Yes        | Authors have all previously published extensively in this field | Yes        | Published in peer reviewed journal. Aim isn't explicitly presented, but article is referencing/ reporting on workshop | Yes        | EU specific context | Yes         | Author bias isn't stated, but discussion presents clear standpoint and is balanced | Yes        | Reference s workshop in 2017 that inspired the publication, references recent literature | Yes          | Contribute s meaningfully to discussion of HSS in the EU |

1  
2  
3  
4  
5  
6  
7  
8  
9  
10  
11  
12  
13  
14  
15  
16  
17  
18  
19  
20  
21  
22  
23  
24  
25  
26  
27  
28  
29  
30  
31  
32  
33  
34  
35  
36  
37  
38  
39  
40  
41  
42  
43  
44  
45  
46  
47

| Reference                                                                                                                             | Authority  |                                                       | Accuracy   |                                                                                                                            | Coverage   |                                                                               | Objectivity |                                                                             | Date       |                                              | Significance |                                                                                              |
|---------------------------------------------------------------------------------------------------------------------------------------|------------|-------------------------------------------------------|------------|----------------------------------------------------------------------------------------------------------------------------|------------|-------------------------------------------------------------------------------|-------------|-----------------------------------------------------------------------------|------------|----------------------------------------------|--------------|----------------------------------------------------------------------------------------------|
|                                                                                                                                       | Yes or no? | Comment                                               | Yes or no? | Comment                                                                                                                    | Yes or no? | Comment                                                                       | Yes or no?  | Comment                                                                     | Yes or no? | Comment                                      | Yes or no?   | Comment                                                                                      |
| e, primary care, data collection and citizens' participation. Journal of public health (Oxford, England)                              |            |                                                       |            | held in parliament                                                                                                         |            |                                                                               |             |                                                                             |            |                                              |              |                                                                                              |
| Lehoux P, Roncarolo F, Silva HP, Boivin A, Denis JL, Hebert R. What Health Systems Challenges Should Responsible Innovation in Health | Yes        | Authors have strong publication record in PR journals | Yes        | Aim stated, methods clearly stated, published in PR journal<br>aim stated, methods clearly stated, published in PR journal | Yes        | International scoping review with well defined parameters and search strategy | Yes         | Bias isn't stated but limitations of review are, and standpoint is balanced | Yes        | Articles included for review span 2000-2016. | Yes          | Very detailed scoping review, identifies a number of challenges facing global health systems |



| Reference                                                                           | Authority  |                                                                           | Accuracy   |                                                                                        | Coverage   |                                                                | Objectivity |                                                 | Date       |                                                            | Significance |                                                                             |
|-------------------------------------------------------------------------------------|------------|---------------------------------------------------------------------------|------------|----------------------------------------------------------------------------------------|------------|----------------------------------------------------------------|-------------|-------------------------------------------------|------------|------------------------------------------------------------|--------------|-----------------------------------------------------------------------------|
|                                                                                     | Yes or no? | Comment                                                                   | Yes or no? | Comment                                                                                | Yes or no? | Comment                                                        | Yes or no?  | Comment                                         | Yes or no? | Comment                                                    | Yes or no?   | Comment                                                                     |
| Address? Insights From an International Scoping Review. Int. 2019;8(2): 63-75.      |            |                                                                           |            |                                                                                        |            |                                                                |             |                                                 |            |                                                            |              |                                                                             |
| Editorial. Healthcare quarterly (Toronto, Ont.). 2020;22(4)                         |            | Authors not stated- editors of Healthcare Quarterly-a                     |            | Commentary- no aim or methods                                                          | Yes        | Canada specific                                                | Yes         | Standpoint clear                                | Yes        | Context is identifiable because of contemporary references |              |                                                                             |
| Abimbola S, Baatiema L, Bigdeli M. The impacts of decentralization on health system | Yes        | Authors from reputable institutions with good publication records in peer | Yes        | Clear methodology/ search strategy. In peer reviewed journal. No aim explicitly stated | Yes        | Wide coverage- looking at low/middle and high income countries | Yes         | Author bias not stated, but balanced standpoint | Yes        | Context of article identified                              | Yes          | Identified three mechanisms by which decentralization may influence equity, |

1  
2  
3  
4  
5  
6  
7  
8  
9  
10  
11  
12  
13  
14  
15  
16  
17  
18  
19  
20  
21  
22  
23  
24  
25  
26  
27  
28  
29  
30  
31  
32  
33  
34  
35  
36  
37  
38  
39  
40  
41  
42  
43  
44  
45  
46  
47

| Reference                                                                                                                        | Authority  |                                      | Accuracy   |                                                                   | Coverage   |                   | Objectivity |                                               | Date       |                                                                                            | Significance |                                                                         |
|----------------------------------------------------------------------------------------------------------------------------------|------------|--------------------------------------|------------|-------------------------------------------------------------------|------------|-------------------|-------------|-----------------------------------------------|------------|--------------------------------------------------------------------------------------------|--------------|-------------------------------------------------------------------------|
|                                                                                                                                  | Yes or no? | Comment                              | Yes or no? | Comment                                                           | Yes or no? | Comment           | Yes or no?  | Comment                                       | Yes or no? | Comment                                                                                    | Yes or no?   | Comment                                                                 |
| equity, efficiency and resilience: a realist synthesis of the evidence. Health Policy & Planning. 2019;34(8):605-617             |            | reviewed journals                    |            |                                                                   |            |                   |             |                                               |            |                                                                                            |              | efficiency, and resilience in 25 countries (low middle and high income) |
| Craig N, Robinson M. Towards a preventative approach to improving health and reducing health inequalities: a view from Scotland. | Yes        | Both authors affiliated with the NHS | Yes        | no aims or method stated but is peer reviewed and well referenced | Yes        | Scotland specific | Yes         | Author bias not stated but viewpoint is clear | Yes        | Context easy to discern based on references and analysis of trends in previous 10-15 years | Yes          | Useful in Scottish context                                              |

| Reference                                                                                                                               | Authority  |                                                                                                                                 | Accuracy   |                                        | Coverage   |                                                       | Objectivity |                                  | Date       |                             | Significance |         |
|-----------------------------------------------------------------------------------------------------------------------------------------|------------|---------------------------------------------------------------------------------------------------------------------------------|------------|----------------------------------------|------------|-------------------------------------------------------|-------------|----------------------------------|------------|-----------------------------|--------------|---------|
|                                                                                                                                         | Yes or no? | Comment                                                                                                                         | Yes or no? | Comment                                | Yes or no? | Comment                                               | Yes or no?  | Comment                          | Yes or no? | Comment                     | Yes or no?   | Comment |
| Public health. 2019;169: 195-200.                                                                                                       |            |                                                                                                                                 |            |                                        |            |                                                       |             |                                  |            |                             |              |         |
| Costa-Font J, Levaggi R. Innovation, aging, and health care: Unraveling "silver" from "red" herrings? Health Econ. 2020;29 Suppl 1:3-7. | Yes        | Both authors have strong publication history and are associated with reputable institutions. Published in peer reviewed journal | Yes        | Peer reviewed, no aim or method stated | Yes        | special issue presents papers presented at a workshop | Yes         | There isn't a bias stated        | Yes        | discernible from references | Yes          |         |
| Derakhshani N, Doshman gir L, Ahmadi A, Fakhri A,                                                                                       | Yes        | Authors have strong publication history                                                                                         | Yes        | Detailed methods and search strategy   | Yes        | Parameters defined in search strategy                 | Yes         | Bias not stated, viewpoint clear | Yes        | Context is discernible      | Yes          |         |

1  
2  
3  
4  
5  
6  
7  
8  
9  
10  
11  
12  
13  
14  
15  
16  
17  
18  
19  
20  
21  
22  
23  
24  
25  
26  
27  
28  
29  
30  
31  
32  
33  
34  
35  
36  
37  
38  
39  
40  
41  
42  
43  
44  
45  
46  
47

| Reference                                                                                                                                                                                                                     | Authority  |         | Accuracy   |         | Coverage   |         | Objectivity |         | Date       |         | Significance |         |
|-------------------------------------------------------------------------------------------------------------------------------------------------------------------------------------------------------------------------------|------------|---------|------------|---------|------------|---------|-------------|---------|------------|---------|--------------|---------|
|                                                                                                                                                                                                                               | Yes or no? | Comment | Yes or no? | Comment | Yes or no? | Comment | Yes or no?  | Comment | Yes or no? | Comment | Yes or no?   | Comment |
| Sadeghi-Bazargani H, Gordeev VS. Monitoring Process Barriers and Enablers Towards Universal Health Coverage Within the Sustainable Development Goals: A Systematic Review and Content Analysis. ClinicoEconomics and outcomes |            |         |            |         |            |         |             |         |            |         |              |         |

For peer review only

| Reference                                                                                                                                                                              | Authority  |                                                  | Accuracy   |                          | Coverage   |                  | Objectivity |         | Date       |                                        | Significance |         |
|----------------------------------------------------------------------------------------------------------------------------------------------------------------------------------------|------------|--------------------------------------------------|------------|--------------------------|------------|------------------|-------------|---------|------------|----------------------------------------|--------------|---------|
|                                                                                                                                                                                        | Yes or no? | Comment                                          | Yes or no? | Comment                  | Yes or no? | Comment          | Yes or no?  | Comment | Yes or no? | Comment                                | Yes or no?   | Comment |
| research : CEOR. 2020;12:4 59-472                                                                                                                                                      |            |                                                  |            |                          |            |                  |             |         |            |                                        |              |         |
| Clancy C. Creating World-Class Care and Service for Our Nation's Finest: How Veterans Health Administration Diffusion of Excellence Initiative Is Innovating and Transforming Veterans |            | Author affiliated with VA, no publication record | Yes        | In peer reviewed journal | Yes        | Restricted to VA |             |         | Yes        | Date and context discernible from text |              |         |

1  
2  
3  
4  
5  
6  
7  
8  
9  
10  
11  
12  
13  
14  
15  
16  
17  
18  
19  
20  
21  
22  
23  
24  
25  
26  
27  
28  
29  
30  
31  
32  
33  
34  
35  
36  
37  
38  
39  
40  
41  
42  
43  
44  
45  
46  
47

| Reference                                                                                                                                  | Authority  |                                        | Accuracy   |                                                | Coverage   |                                                                                            | Objectivity |                                                        | Date       |                                     | Significance |                               |
|--------------------------------------------------------------------------------------------------------------------------------------------|------------|----------------------------------------|------------|------------------------------------------------|------------|--------------------------------------------------------------------------------------------|-------------|--------------------------------------------------------|------------|-------------------------------------|--------------|-------------------------------|
|                                                                                                                                            | Yes or no? | Comment                                | Yes or no? | Comment                                        | Yes or no? | Comment                                                                                    | Yes or no?  | Comment                                                | Yes or no? | Comment                             | Yes or no?   | Comment                       |
| Affairs Health Care. Perm. 2019;23                                                                                                         |            |                                        |            |                                                |            |                                                                                            |             |                                                        |            |                                     |              |                               |
| Marcotte LM, Moriates C, Wolfson DB, Frankel RM. Professionalism as the Bedrock of High-Value Care. Academic Medicine. 2020;95(6):864-867. | Yes        | Authors have strong publication record | Yes        | Peer reviewed                                  | Yes        | No limits stated, but is restricted to looking at healthcare professionals (in US context) | Yes         | Bias not explicitly stated, but standpoint is balanced | Yes        | Date/context discernible from text  | Yes          |                               |
| Witter S, Palmer N, Balabano va D, et al. Health                                                                                           | Yes        | Authors have strong publication record | Yes        | Peer reviewed, but there is no aims or methods | Yes        | Looked at studies published between 2000 and 2018                                          | Yes         | Acknowledgement of biases and limitations; well        | Yes        | Context discernible from references | Yes          | Contributes to the literature |

| Reference                                                                                                                                                                      | Authority  |                                             | Accuracy   |                                                | Coverage   |                                    | Objectivity |                     | Date       |                     | Significance |                                                              |
|--------------------------------------------------------------------------------------------------------------------------------------------------------------------------------|------------|---------------------------------------------|------------|------------------------------------------------|------------|------------------------------------|-------------|---------------------|------------|---------------------|--------------|--------------------------------------------------------------|
|                                                                                                                                                                                | Yes or no? | Comment                                     | Yes or no? | Comment                                        | Yes or no? | Comment                            | Yes or no?  | Comment             | Yes or no? | Comment             | Yes or no?   | Comment                                                      |
| system strengthen ing- Reflection s on its meaning, assessmen t, and our state of knowledg e. Internatio nal Journal of Health Planning & Managem ent. 2019;34(4 ):e1980-e1989 |            |                                             |            |                                                |            | focussed on interventio ns in LMIC |             | balanced standpoint |            |                     |              |                                                              |
| Sturmb erg JP. Resilience for health- an emergent property                                                                                                                     | Yes        | Author has publication record in this field | Yes        | Peer reviewed, but there is no aims or methods |            | Limits not stated                  |             | No bias stated      |            | No discernible date | Yes          | Contributes to conversatio n around health system resilience |

1  
2  
3  
4  
5  
6  
7  
8  
9  
10  
11  
12  
13  
14  
15  
16  
17  
18  
19  
20  
21  
22  
23  
24  
25  
26  
27  
28  
29  
30  
31  
32  
33  
34  
35  
36  
37  
38  
39  
40  
41  
42  
43  
44  
45  
46  
47

| Reference                                                                                                                                      | Authority  |                                     | Accuracy   |               | Coverage   |                                                     | Objectivity |                                                        | Date       |                                                                                        | Significance |         |
|------------------------------------------------------------------------------------------------------------------------------------------------|------------|-------------------------------------|------------|---------------|------------|-----------------------------------------------------|-------------|--------------------------------------------------------|------------|----------------------------------------------------------------------------------------|--------------|---------|
|                                                                                                                                                | Yes or no? | Comment                             | Yes or no? | Comment       | Yes or no? | Comment                                             | Yes or no?  | Comment                                                | Yes or no? | Comment                                                                                | Yes or no?   | Comment |
| of the "health systems as a whole". Journal of evaluation in clinical practice. 2018;24(6):1323-1329.                                          |            |                                     |            |               |            |                                                     |             |                                                        |            |                                                                                        |              |         |
| Thistlethwaite JE, Dunston R, Yassine T. The times are changing: workforce planning, new health-care models and the need for interprofessional | Yes        | Authors from reputable institutions | Yes        | Peer reviewed | Yes        | Specific to Australia/ the Australian health system | Yes         | Bias not explicitly stated, but standpoint is balanced | Yes        | References contemporary reports about Australian health system. Context is discernible | Yes          |         |



| Reference                                                                                                                                                   | Authority  |                                        | Accuracy   |                                                                                      | Coverage   |                                           | Objectivity |                     | Date       |                                                                                      | Significance |                               |
|-------------------------------------------------------------------------------------------------------------------------------------------------------------|------------|----------------------------------------|------------|--------------------------------------------------------------------------------------|------------|-------------------------------------------|-------------|---------------------|------------|--------------------------------------------------------------------------------------|--------------|-------------------------------|
|                                                                                                                                                             | Yes or no? | Comment                                | Yes or no? | Comment                                                                              | Yes or no? | Comment                                   | Yes or no?  | Comment             | Yes or no? | Comment                                                                              | Yes or no?   | Comment                       |
| education in Australia. Journal of interprofessional care. 2019;33(4):361-368.                                                                              |            |                                        |            |                                                                                      |            |                                           |             |                     |            |                                                                                      |              |                               |
| Iskrov G, Stefanov R, Ferrelli RM. Health systems for rare diseases: financial sustainability. Annali dell'Istituto superiore di sanita. 2019;55(3):270-275 | Yes        | Authors have strong publication record | Yes        | No clear aim stated, but there is clear methodology and paper has been peer reviewed | Yes        | Covers health systems in EU member states | Yes         | Balanced standpoint | Yes        | References contemporary reports about health systems in the EU-context is very clear | Yes          | Contributes to the literature |

## PRISMA CHECKLIST

### Preferred Reporting Items for Systematic reviews and Meta-Analyses extension for Scoping Reviews (PRISMA-ScR) Checklist

| SECTION                                               | ITEM | PRISMA-ScR CHECKLIST ITEM                                                                                                                                                                                                                                                                                  | REPORTED ON PAGE #      |
|-------------------------------------------------------|------|------------------------------------------------------------------------------------------------------------------------------------------------------------------------------------------------------------------------------------------------------------------------------------------------------------|-------------------------|
| <b>TITLE</b>                                          |      |                                                                                                                                                                                                                                                                                                            |                         |
| Title                                                 | 1    | Identify the report as a scoping review.                                                                                                                                                                                                                                                                   | 4                       |
| <b>ABSTRACT</b>                                       |      |                                                                                                                                                                                                                                                                                                            |                         |
| Structured summary                                    | 2    | Provide a structured summary that includes (as applicable): background, objectives, eligibility criteria, sources of evidence, charting methods, results, and conclusions that relate to the review questions and objectives.                                                                              | 4-5                     |
| <b>INTRODUCTION</b>                                   |      |                                                                                                                                                                                                                                                                                                            |                         |
| Rationale                                             | 3    | Describe the rationale for the review in the context of what is already known. Explain why the review questions/objectives lend themselves to a scoping review approach.                                                                                                                                   | 7-8                     |
| Objectives                                            | 4    | Provide an explicit statement of the questions and objectives being addressed with reference to their key elements (e.g., population or participants, concepts, and context) or other relevant key elements used to conceptualize the review questions and/or objectives.                                  | 8                       |
| <b>METHODS</b>                                        |      |                                                                                                                                                                                                                                                                                                            |                         |
| Protocol and registration                             | 5    | Indicate whether a review protocol exists; state if and where it can be accessed (e.g., a Web address); and if available, provide registration information, including the registration number.                                                                                                             | N/A                     |
| Eligibility criteria                                  | 6    | Specify characteristics of the sources of evidence used as eligibility criteria (e.g., years considered, language, and publication status), and provide a rationale.                                                                                                                                       | 9-10                    |
| Information sources*                                  | 7    | Describe all information sources in the search (e.g., databases with dates of coverage and contact with authors to identify additional sources), as well as the date the most recent search was executed.                                                                                                  | 9-10, Additional file 1 |
| Search                                                | 8    | Present the full electronic search strategy for at least 1 database, including any limits used, such that it could be repeated.                                                                                                                                                                            | Additional file 1       |
| Selection of sources of evidence†                     | 9    | State the process for selecting sources of evidence (i.e., screening and eligibility) included in the scoping review.                                                                                                                                                                                      | 9-11                    |
| Data charting process‡                                | 10   | Describe the methods of charting data from the included sources of evidence (e.g., calibrated forms or forms that have been tested by the team before their use, and whether data charting was done independently or in duplicate) and any processes for obtaining and confirming data from investigators. | N/A                     |
| Data items                                            | 11   | List and define all variables for which data were sought and any assumptions and simplifications made.                                                                                                                                                                                                     | Table 1, page 10        |
| Critical appraisal of individual sources of evidence§ | 12   | If done, provide a rationale for conducting a critical appraisal of included sources of evidence; describe                                                                                                                                                                                                 | 11                      |

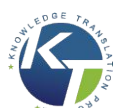

| SECTION                                       | ITEM | PRISMA-ScR CHECKLIST ITEM                                                                                                                                                                       | REPORTED ON PAGE # |
|-----------------------------------------------|------|-------------------------------------------------------------------------------------------------------------------------------------------------------------------------------------------------|--------------------|
|                                               |      | the methods used and how this information was used in any data synthesis (if appropriate).                                                                                                      |                    |
| Synthesis of results                          | 13   | Describe the methods of handling and summarizing the data that were charted.                                                                                                                    | 9-11               |
| <b>RESULTS</b>                                |      |                                                                                                                                                                                                 |                    |
| Selection of sources of evidence              | 14   | Give numbers of sources of evidence screened, assessed for eligibility, and included in the review, with reasons for exclusions at each stage, ideally using a flow diagram.                    | 11-13              |
| Characteristics of sources of evidence        | 15   | For each source of evidence, present characteristics for which data were charted and provide the citations.                                                                                     | 11-13              |
| Critical appraisal within sources of evidence | 16   | If done, present data on critical appraisal of included sources of evidence (see item 12).                                                                                                      | 13                 |
| Results of individual sources of evidence     | 17   | For each included source of evidence, present the relevant data that were charted that relate to the review questions and objectives.                                                           | 11-21              |
| Synthesis of results                          | 18   | Summarize and/or present the charting results as they relate to the review questions and objectives.                                                                                            | 13-21              |
| <b>DISCUSSION</b>                             |      |                                                                                                                                                                                                 |                    |
| Summary of evidence                           | 19   | Summarize the main results (including an overview of concepts, themes, and types of evidence available), link to the review questions and objectives, and consider the relevance to key groups. | 22-25              |
| Limitations                                   | 20   | Discuss the limitations of the scoping review process.                                                                                                                                          | 25                 |
| Conclusions                                   | 21   | Provide a general interpretation of the results with respect to the review questions and objectives, as well as potential implications and/or next steps.                                       | 26                 |
| <b>FUNDING</b>                                |      |                                                                                                                                                                                                 |                    |
| Funding                                       | 22   | Describe sources of funding for the included sources of evidence, as well as sources of funding for the scoping review. Describe the role of the funders of the scoping review.                 | 28                 |

JBI = Joanna Briggs Institute; PRISMA-ScR = Preferred Reporting Items for Systematic reviews and Meta-Analyses extension for Scoping Reviews.

\* Where *sources of evidence* (see second footnote) are compiled from, such as bibliographic databases, social media platforms, and Web sites.

† A more inclusive/heterogeneous term used to account for the different types of evidence or data sources (e.g., quantitative and/or qualitative research, expert opinion, and policy documents) that may be eligible in a scoping review as opposed to only studies. This is not to be confused with *information sources* (see first footnote).

‡ The frameworks by Arksey and O'Malley (6) and Levac and colleagues (7) and the JBI guidance (4, 5) refer to the process of data extraction in a scoping review as data charting.

§ The process of systematically examining research evidence to assess its validity, results, and relevance before using it to inform a decision. This term is used for items 12 and 19 instead of "risk of bias" (which is more applicable to systematic reviews of interventions) to include and acknowledge the various sources of evidence that may be used in a scoping review (e.g., quantitative and/or qualitative research, expert opinion, and policy document).

From: Tricco AC, Lillie E, Zarin W, O'Brien KK, Colquhoun H, Levac D, et al. PRISMA Extension for Scoping Reviews (PRISMA-ScR): Checklist and Explanation. *Ann Intern Med.* 2018;169:467–473. doi: [10.7326/M18-0850](https://doi.org/10.7326/M18-0850).

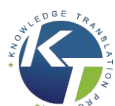

St. Michael's

Inspired Care.  
Inspiring Science.

For peer review only - <http://bmjopen.bmj.com/site/about/guidelines.xhtml>
