# Supplementary material for: How can the healthcare system deliver sustainable performance? A scoping review
Source: HighWire-hosted journal article supplement (doi:10.1136/bmjopen-2021-059207), 2022-05-01
Supplement: bmjopen-2021-059207supp001_data_supplement.pdf [file bmjopen-2021-059207supp001_data_supplement.pdf]

**HOW CAN THE HEALTHCARE SYSTEM DELIVER SUSTAINABLE  
PERFORMANCE?  
A SCOPING REVIEW**

**ADDITIONAL FILE 1: SEARCH STRATEGY**

|                   | <b>PubMed</b>                                                                                                                                                                                                 | <b>Ovid Medline</b>                                                                                                                                               |
|-------------------|---------------------------------------------------------------------------------------------------------------------------------------------------------------------------------------------------------------|-------------------------------------------------------------------------------------------------------------------------------------------------------------------|
|                   | ((sustainab*[Title/Abstract])<br>OR resilien*[Title/Abstract]) AND (((("health system*" [Title/Abstract]) OR "health system* performance" [Title/Abstract]) OR "health system* improvement" [Title/Abstract]) | "health system* performance"<br><br>"health system* improvement"<br><br>(health adj3 system)<br><br>1 OR 2 OR 3<br><br>(sustainab* OR resilience*)<br><br>4 AND 5 |
| Additional Limits | English Language                                                                                                                                                                                              | English Language                                                                                                                                                  |
| Yield             | 3056 articles                                                                                                                                                                                                 | 2619 articles                                                                                                                                                     |
