# Supplementary material for: How can the healthcare system deliver sustainable performance? A scoping review
Source: HighWire-hosted journal article supplement (doi:10.1136/bmjopen-2021-059207), 2022-05-01
Supplement: bmjopen-2021-059207supp002_data_supplement.pdf [file bmjopen-2021-059207supp002_data_supplement.pdf]

**HOW CAN THE HEALTHCARE SYSTEM DELIVER SUSTAINABLE PERFORMANCE?  
A SCOPING REVIEW**

**ADDITIONAL FILE 2: SUMMARY OF INCLUDED PAPERS**

**Summary of included studies in scoping review and reasons for inclusion**

| <i>Article demographics</i>                            |      |             |        | <i>Reason for article inclusion and summary of results</i> |                   |                                                                                          |                                                                                                |                                                                                                                                           |          |
|--------------------------------------------------------|------|-------------|--------|------------------------------------------------------------|-------------------|------------------------------------------------------------------------------------------|------------------------------------------------------------------------------------------------|-------------------------------------------------------------------------------------------------------------------------------------------|----------|
| Reference                                              | Year | Country     | Type * | 1. Definition of SPHS                                      | 2. Measuring SPHS | 3. Challenges to SPHS                                                                    | 4. Improvements to SPHS                                                                        | 5. Sustaining or scaling change for SPHS                                                                                                  | 6. Other |
| Al Dhawi AA, West DJ, Jr., Spinelli RJ, Gompf TA. 2007 | 2007 | Oman        | ED     |                                                            |                   | Increased consumer expectations, increased medication costs, and resource constraints    | The environment, financial sustainability, institutional sustainability, demand sustainability | The need to examine the entire system: social, economic, and environmental determinants of health to sustain changes in the health system |          |
| Amalberti, R., W. Nicklin, and J. Braithwaite. 2016.   | 2016 | Worldwide   | ED     |                                                            |                   | Ageing population, patients with comorbidities, and expensive health conditions to treat |                                                                                                |                                                                                                                                           |          |
| Ament SMC,                                             | 2014 | Netherlands | EM     |                                                            |                   |                                                                                          |                                                                                                | The importance of internal                                                                                                                |          |

| <i>Article demographics</i>                                                   |             |                |               | <i>Reason for article inclusion and summary of results</i> |                          |                                                                                                                                                                                                                                            |                                                                                              |                                                                                                      |                 |
|-------------------------------------------------------------------------------|-------------|----------------|---------------|------------------------------------------------------------|--------------------------|--------------------------------------------------------------------------------------------------------------------------------------------------------------------------------------------------------------------------------------------|----------------------------------------------------------------------------------------------|------------------------------------------------------------------------------------------------------|-----------------|
| <b>Reference</b>                                                              | <b>Year</b> | <b>Country</b> | <b>Type *</b> | <b>1. Definition of SPHS</b>                               | <b>2. Measuring SPHS</b> | <b>3. Challenges to SPHS</b>                                                                                                                                                                                                               | <b>4. Improvements to SPHS</b>                                                               | <b>5. Sustaining or scaling change for SPHS</b>                                                      | <b>6. Other</b> |
| Gillissen F, Moser A, Maessen JMC, Dirksen CD, von Meyenfeldt MF, et al. 2014 |             |                |               |                                                            |                          |                                                                                                                                                                                                                                            |                                                                                              | auditing and feedback of outcomes, (e.g., reminders and meetings), changing organisational structure |                 |
| Armstrong BK, Gillespie JA, Leeder SR, Rubin GL, Russell LM. 2007             | 2007        | Australia      | ED            |                                                            |                          | 1. Demography of disease and ageing population; 2. Increasing medical cost; 3. Health workforce supply and distribution; 4. Problems with the quality and safety; 5. Balancing private and public health; 6. Recognition in the importance | Solutions must include elements of prevention, and primary and acute rehabilitation services |                                                                                                      |                 |

| <i>Article demographics</i>         |      |             |        | <i>Reason for article inclusion and summary of results</i> |                   |                                                                                                                         |                                                                                                                        |                                          |          |
|-------------------------------------|------|-------------|--------|------------------------------------------------------------|-------------------|-------------------------------------------------------------------------------------------------------------------------|------------------------------------------------------------------------------------------------------------------------|------------------------------------------|----------|
| Reference                           | Year | Country     | Type * | 1. Definition of SPHS                                      | 2. Measuring SPHS | 3. Challenges to SPHS                                                                                                   | 4. Improvements to SPHS                                                                                                | 5. Sustaining or scaling change for SPHS | 6. Other |
|                                     |      |             |        |                                                            |                   | of investing in the health of the next generation; 7. Urban planning for sustainable communities; 8. Inequity in health |                                                                                                                        |                                          |          |
| Atmore C. 2015                      | 2015 | New Zealand | ED     |                                                            |                   | Doctors are becoming more specialised, but needs to become more generalist to look after the whole person               | Transalpine service model (developed in a rural NZ hospital) provides options for sustainable healthcare in the future |                                          |          |
| Barasa EW, Cloete K, Gilson L. 2017 | 2017 | Worldwide   | ED     | Resilience is an important quality for creative adaptation |                   | The challenge of thinking of everyday resilience rather than just crises                                                |                                                                                                                        |                                          |          |
| Bessler JS, Ellies M. 1995          | 1995 | Australia   | ED     |                                                            |                   | Admissions rise, and doctors are using technology more regularly. Public                                                | Need to decrease the number of beds in the public hospitals (as 15% of inpatients should not be,                       |                                          |          |

| <i>Article demographics</i>                      |      |           |       | <i>Reason for article inclusion and summary of results</i> |                                                                                                                                                                                  |                                                                                                                                                                        |                                                                                                                                                                |                                          |          |
|--------------------------------------------------|------|-----------|-------|------------------------------------------------------------|----------------------------------------------------------------------------------------------------------------------------------------------------------------------------------|------------------------------------------------------------------------------------------------------------------------------------------------------------------------|----------------------------------------------------------------------------------------------------------------------------------------------------------------|------------------------------------------|----------|
| Reference                                        | Year | Country   | Type* | 1. Definition of SPHS                                      | 2. Measuring SPHS                                                                                                                                                                | 3. Challenges to SPHS                                                                                                                                                  | 4. Improvements to SPHS                                                                                                                                        | 5. Sustaining or scaling change for SPHS | 6. Other |
|                                                  |      |           |       |                                                            |                                                                                                                                                                                  | expenditure on healthcare has remained 'flat' but private healthcare premiums continue to escalate                                                                     | according to research), increase continuity of patient care (termed 'integrated networks'), and have less of a divide between state and federal health systems |                                          |          |
| Birch S, Murphy GT, MacKenzie A, Cumming J. 2015 | 2015 | Worldwide | ED    |                                                            | Healthcare sustainability framework (HCSF), showing the relationship between expenditure levels, the determinants of expenditure, revenues to support the healthcare system, and | The unintended consequences of redistributing cost of care and responding to the needs of the population e.g., redistributes what socio-economic groups use healthcare | Sustainability frameworks should consider the needs and trends of the population, the work force, financial and service information                            |                                          |          |

| <i>Article demographics</i>                                                                |      |                          |       | <i>Reason for article inclusion and summary of results</i>             |                                                                 |                                                                                |                                                                                          |                                                                                                                                                  |          |
|--------------------------------------------------------------------------------------------|------|--------------------------|-------|------------------------------------------------------------------------|-----------------------------------------------------------------|--------------------------------------------------------------------------------|------------------------------------------------------------------------------------------|--------------------------------------------------------------------------------------------------------------------------------------------------|----------|
| Reference                                                                                  | Year | Country                  | Type* | 1. Definition of SPHS                                                  | 2. Measuring SPHS                                               | 3. Challenges to SPHS                                                          | 4. Improvements to SPHS                                                                  | 5. Sustaining or scaling change for SPHS                                                                                                         | 6. Other |
|                                                                                            |      |                          |       |                                                                        | their relationship to fiscal and political sustainability       |                                                                                |                                                                                          |                                                                                                                                                  |          |
| Braithwaite, J., D. Marks, and N. Taylor. 2014                                             | 2014 | Australia                | RA    | Sustainability defined as the mid-to-long-term acceptance of a program |                                                                 | Looks at the need to improve implementation science, leading to sustainability | Sustainability was one of eight key factors in implementing changes in the health system | Sustainability needs to be considered from the inception of change programs and projects, and there needs to be commitment at a managerial level |          |
| Bramesfeld, A., F. Amadeo, J. Caldas-de-Almeida, G. Cardoso, A. Depaigne-Loth, R. Derenne, | 2016 | European Union Countries | EM    |                                                                        | Measure and compare different countries using the QMP-MHC scale | Recognises the challenge of bridging policy and practice                       |                                                                                          |                                                                                                                                                  |          |

| <i>Article demographics</i>              |      |                           |        | <i>Reason for article inclusion and summary of results</i>                              |                                                                                        |                                                                                                                                                                                                                                                                          |                         |                                           |          |
|------------------------------------------|------|---------------------------|--------|-----------------------------------------------------------------------------------------|----------------------------------------------------------------------------------------|--------------------------------------------------------------------------------------------------------------------------------------------------------------------------------------------------------------------------------------------------------------------------|-------------------------|-------------------------------------------|----------|
| Reference                                | Year | Country                   | Type * | 1. Definition of SPHS                                                                   | 2. Measuring SPHS                                                                      | 3. Challenges to SPHS                                                                                                                                                                                                                                                    | 4. Improvements to SPHS | 5. Sustaining or scaling change for SPHS  | 6. Other |
| V. Donisi et al. 2016.                   |      |                           |        |                                                                                         |                                                                                        |                                                                                                                                                                                                                                                                          |                         |                                           |          |
| Buchan J. 2004.                          | 2004 | Worldwide                 | ED     | Argues that a HR policy is central to any sustainable health system performance changes | Must be sector specific measures e.g., staff per occupied bed, patient acuity measures | The lack of consistent human resource management (HRM), as well as lack of being able to fit HRM to organisational characteristics, context and priorities, and link this to sustainable improvements. No single intervention is likely to be effective in all contexts. |                         | There is low take-up of HRM interventions |          |
| Buchan JM, Naccarella L, Brooks PM. 2011 | 2011 | Australia and New Zealand | ED     | The ability for Australia and New Zealand to train enough                               | Measurement is limited, e.g., can see if healthcare staff have                         | Brings into question attitudes of the country towards skilled                                                                                                                                                                                                            |                         |                                           |          |

| <i>Article demographics</i>           |             |                |               | <i>Reason for article inclusion and summary of results</i>                                                               |                                                                                                                 |                                                                                                                                                                                                                                                  |                                                                                                                                              |                                                                                                                              |                 |
|---------------------------------------|-------------|----------------|---------------|--------------------------------------------------------------------------------------------------------------------------|-----------------------------------------------------------------------------------------------------------------|--------------------------------------------------------------------------------------------------------------------------------------------------------------------------------------------------------------------------------------------------|----------------------------------------------------------------------------------------------------------------------------------------------|------------------------------------------------------------------------------------------------------------------------------|-----------------|
| <b>Reference</b>                      | <b>Year</b> | <b>Country</b> | <b>Type *</b> | <b>1. Definition of SPHS</b>                                                                                             | <b>2. Measuring SPHS</b>                                                                                        | <b>3. Challenges to SPHS</b>                                                                                                                                                                                                                     | <b>4. Improvements to SPHS</b>                                                                                                               | <b>5. Sustaining or scaling change for SPHS</b>                                                                              | <b>6. Other</b> |
|                                       |             |                |               | health staff to fill the positions for their front-line health staff to reduce the reliance on international recruitment | received a qualification from a country outside Australia, but not how long they have been working in Australia | personnel, immigration, funding of the education sector to train new health personnel (and the time commitment to train new health professionals must also be considered, as must the benefits of overseas personnel for national policy makers) |                                                                                                                                              |                                                                                                                              |                 |
| Burgess LH, Cohen MR, Denham CR. 2010 | 2010        | Worldwide      | ED            |                                                                                                                          |                                                                                                                 | Minimizing adverse drug events (ADEs) (and therefore readmissions) by having pharmacist leaders                                                                                                                                                  | Pharmacists need to become leaders to change hospital organisational and safety culture, working within an inter-disciplinary team to ensure | Pharmacists should be involved in medication counselling during the discharge process, and follow-up after the transition to |                 |

| <i>Article demographics</i>              |      |         |        | <i>Reason for article inclusion and summary of results</i> |                   |                                                                                                             |                                                                                                                                                                                                                                                                                   |                                          |          |
|------------------------------------------|------|---------|--------|------------------------------------------------------------|-------------------|-------------------------------------------------------------------------------------------------------------|-----------------------------------------------------------------------------------------------------------------------------------------------------------------------------------------------------------------------------------------------------------------------------------|------------------------------------------|----------|
| Reference                                | Year | Country | Type * | 1. Definition of SPHS                                      | 2. Measuring SPHS | 3. Challenges to SPHS                                                                                       | 4. Improvements to SPHS                                                                                                                                                                                                                                                           | 5. Sustaining or scaling change for SPHS | 6. Other |
|                                          |      |         |        |                                                            |                   |                                                                                                             | medication and medication issues are managed appropriately. Should also establish a medication review board to investigate near misses, being engaged in teamwork and communication, helping implement computerized systems, and being involved in patient training for discharge | home after hospital discharge            |          |
| Buttigieg SC, Schuetz M, Bezzina F. 2016 | 2016 | Malta   | EM     |                                                            |                   | The need for public and private hospital services to work together to solve complex healthcare problems and | Collaboration between private and public sectors may involve: 1. a regulated semi-competitive health model, whereby the                                                                                                                                                           |                                          |          |



| <i>Article demographics</i>                |             |                |               | <i>Reason for article inclusion and summary of results</i>                                                                                        |                          |                                                                                                                                                               |                                                                                                                                                                                                                                             |                                                                                      |                 |
|--------------------------------------------|-------------|----------------|---------------|---------------------------------------------------------------------------------------------------------------------------------------------------|--------------------------|---------------------------------------------------------------------------------------------------------------------------------------------------------------|---------------------------------------------------------------------------------------------------------------------------------------------------------------------------------------------------------------------------------------------|--------------------------------------------------------------------------------------|-----------------|
| <b>Reference</b>                           | <b>Year</b> | <b>Country</b> | <b>Type *</b> | <b>1. Definition of SPHS</b>                                                                                                                      | <b>2. Measuring SPHS</b> | <b>3. Challenges to SPHS</b>                                                                                                                                  | <b>4. Improvements to SPHS</b>                                                                                                                                                                                                              | <b>5. Sustaining or scaling change for SPHS</b>                                      | <b>6. Other</b> |
|                                            |             |                |               |                                                                                                                                                   |                          | benefit both entities                                                                                                                                         | government sets costs (e.g., for specific tests) and citizens are encouraged to invest in private health insurance; 2. Public-private mix model, which makes care more comprehensive and complete; or 3. Public-private partnerships (PPPs) |                                                                                      |                 |
| Buykx P, Humphreys JS, Tham R, et al. 2012 | 2012        | Australia      | EM            | Providing appropriate and cost-effective care in a way that persists in or can adapt to environment. Should also positively influence the broader |                          | In rural health services, sustainability is threatened by small population size and lack of economy of scale, poorly management structures, low socioeconomic |                                                                                                                                                                                                                                             | Rural health services are enabled by supportive policy and state and federal support |                 |

| <i>Article demographics</i> |             |                          |               | <i>Reason for article inclusion and summary of results</i>                                                          |                          |                                                                                                                                    |                                                                                                                                                                |                                                                                                                            |                 |
|-----------------------------|-------------|--------------------------|---------------|---------------------------------------------------------------------------------------------------------------------|--------------------------|------------------------------------------------------------------------------------------------------------------------------------|----------------------------------------------------------------------------------------------------------------------------------------------------------------|----------------------------------------------------------------------------------------------------------------------------|-----------------|
| <b>Reference</b>            | <b>Year</b> | <b>Country</b>           | <b>Type *</b> | <b>1. Definition of SPHS</b>                                                                                        | <b>2. Measuring SPHS</b> | <b>3. Challenges to SPHS</b>                                                                                                       | <b>4. Improvements to SPHS</b>                                                                                                                                 | <b>5. Sustaining or scaling change for SPHS</b>                                                                            | <b>6. Other</b> |
|                             |             |                          |               | sustainability of the wider community                                                                               |                          | groups, and geographic isolation                                                                                                   |                                                                                                                                                                |                                                                                                                            |                 |
| Casale CR, Clancy CM. 2009  | 2009        | United States of America | ED            |                                                                                                                     |                          |                                                                                                                                    | Improving equity in health through community-based participatory research (CBPR). A component of this research is to plan for long-term process and commitment |                                                                                                                            |                 |
| Cashin A. 2015              | 2015        | Australia                | ED            | A health system must address all aspects of its sustainability , including financial, social and political elements |                          | Being unsure if future conservative governments could threaten universal healthcare, and encouraging nurse innovation in Australia |                                                                                                                                                                | Issue of encouraging government support that will be politically costly in the short-term, but beneficial in the long term |                 |

| <i>Article demographics</i>              |             |                          |               | <i>Reason for article inclusion and summary of results</i>                                                                                                    |                                                                                                                                                         |                                                                                                                                                                                                                                                                                              |                                                                                                                                                                                                                                                                |                                                 |                 |
|------------------------------------------|-------------|--------------------------|---------------|---------------------------------------------------------------------------------------------------------------------------------------------------------------|---------------------------------------------------------------------------------------------------------------------------------------------------------|----------------------------------------------------------------------------------------------------------------------------------------------------------------------------------------------------------------------------------------------------------------------------------------------|----------------------------------------------------------------------------------------------------------------------------------------------------------------------------------------------------------------------------------------------------------------|-------------------------------------------------|-----------------|
| <b>Reference</b>                         | <b>Year</b> | <b>Country</b>           | <b>Type *</b> | <b>1. Definition of SPHS</b>                                                                                                                                  | <b>2. Measuring SPHS</b>                                                                                                                                | <b>3. Challenges to SPHS</b>                                                                                                                                                                                                                                                                 | <b>4. Improvements to SPHS</b>                                                                                                                                                                                                                                 | <b>5. Sustaining or scaling change for SPHS</b> | <b>6. Other</b> |
| Chambers DA, Glasgow RE, Stange KC. 2013 | 2013        | Worldwide                | ED            | The continued positive effects of the intervention after the external funding have ended. This is expected to be constantly evaluated, developed and improved | The dynamic sustainability framework (DSF) was created to investigate the fit between the intervention, the practice setting, and the ecological system | Two assumptions of sustaining interventions are challenged: 1. 'voltage drop' where interventions yield lower benefits as they are put into practice outside a laboratory setting; and 2. 'program drift' where programs become less effective due to changes in protocol as it is delivered | Ensure focus on sustainability from the beginning of implementation of the intervention, rather than post-implementation. The setting for the intervention is also important e.g., it should focus on organisational learning, stakeholders should be involved |                                                 |                 |
| Cho CC, Ramanan RA, Feldman MD. 2011     | 2011        | United States of America | EM            |                                                                                                                                                               | Used analysis of nomination letters for mentor awards to analyse what it is to be a good mentor                                                         |                                                                                                                                                                                                                                                                                              | Through mentors being role models and legacies for the future                                                                                                                                                                                                  |                                                 |                 |

| <i>Article demographics</i> |             |                |               | <i>Reason for article inclusion and summary of results</i>                                                                                               |                                                                                              |                                                                                                                                                                                     |                                                                    |                                                                                                                    |                 |
|-----------------------------|-------------|----------------|---------------|----------------------------------------------------------------------------------------------------------------------------------------------------------|----------------------------------------------------------------------------------------------|-------------------------------------------------------------------------------------------------------------------------------------------------------------------------------------|--------------------------------------------------------------------|--------------------------------------------------------------------------------------------------------------------|-----------------|
| <b>Reference</b>            | <b>Year</b> | <b>Country</b> | <b>Type *</b> | <b>1. Definition of SPHS</b>                                                                                                                             | <b>2. Measuring SPHS</b>                                                                     | <b>3. Challenges to SPHS</b>                                                                                                                                                        | <b>4. Improvements to SPHS</b>                                     | <b>5. Sustaining or scaling change for SPHS</b>                                                                    | <b>6. Other</b> |
| Coiera E, Hovenga EJ. 2007  | 2007        | Worldwide      | ED            | Health systems need to be adaptable to changing contexts and strive to be environmentally sustainable                                                    | Making it easier to measure sustainability through increasing transparency in work processes | Financial challenges of healthcare costing more than expected, treating higher volumes of patients with more comorbidities and higher expectations of care, and workforce shortages | Digitisation to cut costs e.g., telemedicine to reduce travel time |                                                                                                                    |                 |
| Crisp N. 2017               | 2017        | United Kingdom | ED            | Internal factors (1. efficiency & effectiveness of healthcare provision, 2. availability of well-trained health staff, 3. cost); external (4. population |                                                                                              | Long term chronic conditions, especially the growing population of elderly with needs for community care                                                                            |                                                                    | The need of the health and care system to be strengthened by support from communities and multi-sectorial partners |                 |

| <i>Article demographics</i> |      |         |        | <i>Reason for article inclusion and summary of results</i>                                                                                                                  |                   |                                                                                                                        |                         |                                          |          |
|-----------------------------|------|---------|--------|-----------------------------------------------------------------------------------------------------------------------------------------------------------------------------|-------------------|------------------------------------------------------------------------------------------------------------------------|-------------------------|------------------------------------------|----------|
| Reference                   | Year | Country | Type * | 1. Definition of SPHS                                                                                                                                                       | 2. Measuring SPHS | 3. Challenges to SPHS                                                                                                  | 4. Improvements to SPHS | 5. Sustaining or scaling change for SPHS | 6. Other |
|                             |      |         |        | health, 5. contribution of carers and informal networks of care, 6. integration of policies and practices), and overall (7. public and political acceptability and support) |                   |                                                                                                                        |                         |                                          |          |
| De Rosi S, Nuti S. 2018     | 2018 | Italy   | EM     |                                                                                                                                                                             |                   | Lack of a national or regional office responsible for project coordination. Longer-term financial investment is needed |                         |                                          |          |
| Delgado, P. 2016            | 2016 | Canada  | ED     |                                                                                                                                                                             |                   | Quality improvement collaborative systems did not                                                                      |                         |                                          |          |

| <i>Article demographics</i>                          |      |                          |       | <i>Reason for article inclusion and summary of results</i> |                                                                                                                                          |                                                                                                                                                                                              |                                                                                      |                                                                                                                           |          |
|------------------------------------------------------|------|--------------------------|-------|------------------------------------------------------------|------------------------------------------------------------------------------------------------------------------------------------------|----------------------------------------------------------------------------------------------------------------------------------------------------------------------------------------------|--------------------------------------------------------------------------------------|---------------------------------------------------------------------------------------------------------------------------|----------|
| Reference                                            | Year | Country                  | Type* | 1. Definition of SPHS                                      | 2. Measuring SPHS                                                                                                                        | 3. Challenges to SPHS                                                                                                                                                                        | 4. Improvements to SPHS                                                              | 5. Sustaining or scaling change for SPHS                                                                                  | 6. Other |
|                                                      |      |                          |       |                                                            |                                                                                                                                          | improve the sustainability of participating health systems in the treatment and management of chronic diseases                                                                               |                                                                                      |                                                                                                                           |          |
| Dhalla I. 2007                                       | 2007 | Canada                   | ED    |                                                            | The article speculates that it may be better to assess healthcare as a proportion of GDP rather than a proportion of Government spending | Politicians are recognising that the 'status quo' may not be sustainable due to system demands. This often assumes tax is static or declining, but this is open to debate and interpretation |                                                                                      | Increasing spending on healthcare can occur as long as it does not impinge upon spending on non-health goods and services |          |
| Dunn, P. M., B. B. Arnetz, J. F. Christensen, and L. | 2007 | United States of America | EM    |                                                            |                                                                                                                                          |                                                                                                                                                                                              | Through a program in which leadership and physicians themselves recognised physician |                                                                                                                           |          |

| <i>Article demographics</i>                            |      |           |        | <i>Reason for article inclusion and summary of results</i> |                   |                                                                                                                                                |                                                                                                   |                                                                                                    |          |
|--------------------------------------------------------|------|-----------|--------|------------------------------------------------------------|-------------------|------------------------------------------------------------------------------------------------------------------------------------------------|---------------------------------------------------------------------------------------------------|----------------------------------------------------------------------------------------------------|----------|
| Reference                                              | Year | Country   | Type * | 1. Definition of SPHS                                      | 2. Measuring SPHS | 3. Challenges to SPHS                                                                                                                          | 4. Improvements to SPHS                                                                           | 5. Sustaining or scaling change for SPHS                                                           | 6. Other |
| Homer. 2007                                            |      |           |        |                                                            |                   |                                                                                                                                                | wellbeing as important, and this well-being was measured                                          |                                                                                                    |          |
| Edwards, N., M. Rowan, P. Marck, and D. Grinspun. 2011 | 2011 | Canada    | RA     |                                                            |                   | "Blockages" in the system e.g., power relationships, or unintentional blockages to innovation                                                  | Through the use of "leverage point" strategies such as structures by which to organise the system | Identified leverage points and blockages in macro- and micro-levels based on the literature review |          |
| Ehrlich C, Kendall E. 2015                             | 2015 | Australia | EM     |                                                            |                   | Participants identified that, should funding cease, the program would not be sustained. This was attributed to limitations in program planning |                                                                                                   |                                                                                                    |          |
| Ellner, A. L., S. Stout, E. E. Sullivan, E. P.         | 2015 | Worldwide | ED     |                                                            |                   | Recognises a lack of traditional metrics to measure health system                                                                              |                                                                                                   |                                                                                                    |          |

| <i>Article demographics</i>                      |      |         |        | <i>Reason for article inclusion and summary of results</i> |                   |                                                                                                                                                                                                                                                                       |                                                                                                                                                                                                                                                                                                    |                                          |          |
|--------------------------------------------------|------|---------|--------|------------------------------------------------------------|-------------------|-----------------------------------------------------------------------------------------------------------------------------------------------------------------------------------------------------------------------------------------------------------------------|----------------------------------------------------------------------------------------------------------------------------------------------------------------------------------------------------------------------------------------------------------------------------------------------------|------------------------------------------|----------|
| Reference                                        | Year | Country | Type * | 1. Definition of SPHS                                      | 2. Measuring SPHS | 3. Challenges to SPHS                                                                                                                                                                                                                                                 | 4. Improvements to SPHS                                                                                                                                                                                                                                                                            | 5. Sustaining or scaling change for SPHS | 6. Other |
| Griffiths, A. Mountjoy, and R. S. Phillips. 2015 |      |         |        |                                                            |                   | improvement or sustainability                                                                                                                                                                                                                                         |                                                                                                                                                                                                                                                                                                    |                                          |          |
| Farmanova E, Kirvan C, Verma J, et al. 2016      | 2016 | Canada  | EM     |                                                            |                   | Lack of leadership support, difficulty creating partnerships, communicating with and engaging with staff and physicians, struggling with funding models that perpetuate working in silos, insufficient time and resources, difficulty obtaining data, data management | Start small, but think big; work toward incremental development; select a portfolio of projects that are manageable and align with Triple aim dimensions; include partners at the outset; strategize and build multidisciplinary teams and leverage existing capabilities; do not make assumptions |                                          |          |



| <i>Article demographics</i> |      |                          |        | <i>Reason for article inclusion and summary of results</i>                                                             |                   |                                                                        |                                                                                                                                                                                                                                                                                                           |                                          |          |
|-----------------------------|------|--------------------------|--------|------------------------------------------------------------------------------------------------------------------------|-------------------|------------------------------------------------------------------------|-----------------------------------------------------------------------------------------------------------------------------------------------------------------------------------------------------------------------------------------------------------------------------------------------------------|------------------------------------------|----------|
| Reference                   | Year | Country                  | Type * | 1. Definition of SPHS                                                                                                  | 2. Measuring SPHS | 3. Challenges to SPHS                                                  | 4. Improvements to SPHS                                                                                                                                                                                                                                                                                   | 5. Sustaining or scaling change for SPHS | 6. Other |
|                             |      |                          |        |                                                                                                                        |                   | and measurement, scoping improvement projects, ensuring sustainability | about patients/clients                                                                                                                                                                                                                                                                                    |                                          |          |
| Fineberg HV. 2012           | 2012 | United States of America | ED     | Affordability (for individuals, organisations and the government), acceptability to key constituents, and adaptability |                   |                                                                        | Increased use of IT, re-doubling the efforts to enhance quality and safety in medical care, improving healthcare of high-need patients in a way that prevents hospitalisations, honour patient preferences, rely on systems engineering and operations research to smooth the patient journey through the |                                          |          |

| <i>Article demographics</i>                                              |      |                          |       | <i>Reason for article inclusion and summary of results</i> |                                                                                  |                                                                     |                                                                                                     |                                          |          |
|--------------------------------------------------------------------------|------|--------------------------|-------|------------------------------------------------------------|----------------------------------------------------------------------------------|---------------------------------------------------------------------|-----------------------------------------------------------------------------------------------------|------------------------------------------|----------|
| Reference                                                                | Year | Country                  | Type* | 1. Definition of SPHS                                      | 2. Measuring SPHS                                                                | 3. Challenges to SPHS                                               | 4. Improvements to SPHS                                                                             | 5. Sustaining or scaling change for SPHS | 6. Other |
|                                                                          |      |                          |       |                                                            |                                                                                  |                                                                     | health system, learn from peers and from evidence, and champion a system that values accountability |                                          |          |
| Foo, C. Y., K. K. Lim, S. Sivasamp u, K. B. Dahian, and P. P. Goh. 2015. | 2015 | Malaysia                 | EM    |                                                            | Measurement using data envelopment analysis (DEA) overtime to measure efficiency |                                                                     |                                                                                                     |                                          |          |
| Fox, L. A., K. E. Walsh, and E. G. Schainker. 2016                       | 2016 | United States of America | EM    |                                                            | Measured group sustainability through staff turnover rate                        |                                                                     |                                                                                                     |                                          |          |
| Garde S, Hullin CM, Chen R, et al. 2007                                  | 2007 | Worldwide                | RA    | Argues that linking the health system sustainability       | There is a lack of qualitative indicators for sustainability. Suggestions of     | There are technological (e.g., making programs that can be flexible |                                                                                                     |                                          |          |

| <i>Article demographics</i>                                                |      |           |        | <i>Reason for article inclusion and summary of results</i>                                                                                                         |                                                                                                                            |                                                                                                                                |                                                     |                                          |          |
|----------------------------------------------------------------------------|------|-----------|--------|--------------------------------------------------------------------------------------------------------------------------------------------------------------------|----------------------------------------------------------------------------------------------------------------------------|--------------------------------------------------------------------------------------------------------------------------------|-----------------------------------------------------|------------------------------------------|----------|
| Reference                                                                  | Year | Country   | Type * | 1. Definition of SPHS                                                                                                                                              | 2. Measuring SPHS                                                                                                          | 3. Challenges to SPHS                                                                                                          | 4. Improvements to SPHS                             | 5. Sustaining or scaling change for SPHS | 6. Other |
|                                                                            |      |           |        | and health information systems is important, but recognises that there is no suitable and all-encompassing definition of sustainability in relation to healthcare. | measuring sustainability by the eMergy (embodied energy) sustainability index                                              | and adapt to context changes), socio-political and organizational (e.g., needing drivers behind interventions) issues/barriers |                                                     |                                          |          |
| Global, regional, and national disability-adjusted life-years (DALYs) 2017 | 2017 | Worldwide | EM     |                                                                                                                                                                    | Used information previously gathered to make decisions regarding healthy life expectancy and risk-adjusted life expectancy |                                                                                                                                | Formulation of sustainable development goals (SDGs) |                                          |          |

| <i>Article demographics</i>                                                       |             |                |              | <i>Reason for article inclusion and summary of results</i>                             |                                                                                                                            |                              |                                                                                                                                       |                                                                                                                                                                                                                         |                 |
|-----------------------------------------------------------------------------------|-------------|----------------|--------------|----------------------------------------------------------------------------------------|----------------------------------------------------------------------------------------------------------------------------|------------------------------|---------------------------------------------------------------------------------------------------------------------------------------|-------------------------------------------------------------------------------------------------------------------------------------------------------------------------------------------------------------------------|-----------------|
| <b>Reference</b>                                                                  | <b>Year</b> | <b>Country</b> | <b>Type*</b> | <b>1. Definition of SPHS</b>                                                           | <b>2. Measuring SPHS</b>                                                                                                   | <b>3. Challenges to SPHS</b> | <b>4. Improvements to SPHS</b>                                                                                                        | <b>5. Sustaining or scaling change for SPHS</b>                                                                                                                                                                         | <b>6. Other</b> |
| Greenhalgh, T., F. Macfarlane, C. Barton-Sweeney, and F. Woodard. 2012            | 2012        | United Kingdom | ED           |                                                                                        | Case study: three-year follow-up of a healthcare program in London that underwent changes in terms of policy and economics |                              | Some services changed over the three years and were altered relating to changes that happened with time e.g., national policy changes | Some interventions were sustained but looked different to the original intervention, due to it being adapted through the three years                                                                                    |                 |
| Gruen RL, Elliott JH, Nolan ML, Lawton PD, Parkhill A, McLaren CJ, Lavis JN. 2008 | 2008        | Worldwide      | RA           | Sustainability after an initial implementation period when funding ceases is difficult |                                                                                                                            |                              |                                                                                                                                       | Targets of interventions to improve sustainability included the individual (e.g., through education), organisation (e.g., changes to policy), community (e.g., social actions) and system levels (e.g. social advocacy) |                 |

| <i>Article demographics</i>                   |      |               |       | <i>Reason for article inclusion and summary of results</i> |                   |                                                                                                                                      |                                                                                                                                                                                    |                                          |          |
|-----------------------------------------------|------|---------------|-------|------------------------------------------------------------|-------------------|--------------------------------------------------------------------------------------------------------------------------------------|------------------------------------------------------------------------------------------------------------------------------------------------------------------------------------|------------------------------------------|----------|
| Reference                                     | Year | Country       | Type* | 1. Definition of SPHS                                      | 2. Measuring SPHS | 3. Challenges to SPHS                                                                                                                | 4. Improvements to SPHS                                                                                                                                                            | 5. Sustaining or scaling change for SPHS | 6. Other |
| Guyon A, Hancock T, Kirk M, et al. 2017       | 2017 | Canada        | ED    |                                                            |                   |                                                                                                                                      | Recognising the importance of governments and the health system providing fund and support for public health, as it delivers important information for the health system to thrive |                                          |          |
| Heron, N. 2015                                | 2015 | North Ireland | EM    |                                                            |                   |                                                                                                                                      | Measure the effect of an intervention for management of musculoskeletal complaints in GP                                                                                           |                                          |          |
| Hibbert PD, Thomas MJW, Deakin A, et al. 2018 | 2018 | Australia     | EM    |                                                            |                   | When there is an adverse event (AE) resulting in a root cause analysis (RCA), there are barely ever (5% of the time) provided strong | Observations and patient and carer interviews and review of notes may be useful in gaining a better understanding of adverse event situations                                      |                                          |          |

| <i>Article demographics</i>                  |      |                                    |        | <i>Reason for article inclusion and summary of results</i>                                       |                                                           |                                                                                                                 |                                                                                                                  |                                                                                                                                                                     |          |
|----------------------------------------------|------|------------------------------------|--------|--------------------------------------------------------------------------------------------------|-----------------------------------------------------------|-----------------------------------------------------------------------------------------------------------------|------------------------------------------------------------------------------------------------------------------|---------------------------------------------------------------------------------------------------------------------------------------------------------------------|----------|
| Reference                                    | Year | Country                            | Type * | 1. Definition of SPHS                                                                            | 2. Measuring SPHS                                         | 3. Challenges to SPHS                                                                                           | 4. Improvements to SPHS                                                                                          | 5. Sustaining or scaling change for SPHS                                                                                                                            | 6. Other |
|                                              |      |                                    |        |                                                                                                  |                                                           | recommendations for altering and improving the health system. 86% of the recommendations were considered 'weak' |                                                                                                                  |                                                                                                                                                                     |          |
| Hovenga EJ. 2013                             | 2013 | Worldwide                          | ED     | Where everyone can access safe and correct health services to achieve the best outcomes possible |                                                           |                                                                                                                 | Four main outcomes or goals: improved health, responsiveness, financial risk protection, and improved efficiency | Information technology (IT) has a role to play in creating sustainable health systems (as it can lead to decisions having better clinical outcomes and lower costs) |          |
| Inotai A, Petrova G, Vitezic D, Kalo Z. 2014 | 2014 | Central-Eastern European Countries | ED     | Focus on financial sustainability                                                                | Measure the potential innovation by new drugs in terms of |                                                                                                                 | Goal of innovative pharmaceutical companies is to provide health gain, equity in                                 |                                                                                                                                                                     |          |

| <i>Article demographics</i> |      |                          |        | <i>Reason for article inclusion and summary of results</i> |                                                              |                                                                       |                                                                                                                                                                                         |                                          |          |
|-----------------------------|------|--------------------------|--------|------------------------------------------------------------|--------------------------------------------------------------|-----------------------------------------------------------------------|-----------------------------------------------------------------------------------------------------------------------------------------------------------------------------------------|------------------------------------------|----------|
| Reference                   | Year | Country                  | Type * | 1. Definition of SPHS                                      | 2. Measuring SPHS                                            | 3. Challenges to SPHS                                                 | 4. Improvements to SPHS                                                                                                                                                                 | 5. Sustaining or scaling change for SPHS | 6. Other |
|                             |      |                          |        |                                                            | monetary value                                               |                                                                       | health, responsiveness of patients with complex comorbidities. To create this financial sustainability, affordable new innovative treatments and political sustainability are necessary |                                          |          |
| Kepros JP, Opreanu RC. 2009 | 2009 | United States of America | ED     |                                                            | Measuring the financial and social output of an organisation |                                                                       | Requires optimal relationships and synergy between the hospital, medical school and physicians, each with their own core competencies                                                   |                                          |          |
| Kerr R, Hendrie DV. 2018    | 2018 | Australia                | EM     | Two meanings: 1) financial sustainability for              |                                                              | To effectively fund patient access to hospital care in a system where |                                                                                                                                                                                         |                                          |          |

| <i>Article demographics</i> |      |                          |        | <i>Reason for article inclusion and summary of results</i>       |                                                                  |                                                                                                                                                    |                                                                                                                                                                                                                                                                                                |                                          |          |
|-----------------------------|------|--------------------------|--------|------------------------------------------------------------------|------------------------------------------------------------------|----------------------------------------------------------------------------------------------------------------------------------------------------|------------------------------------------------------------------------------------------------------------------------------------------------------------------------------------------------------------------------------------------------------------------------------------------------|------------------------------------------|----------|
| Reference                   | Year | Country                  | Type * | 1. Definition of SPHS                                            | 2. Measuring SPHS                                                | 3. Challenges to SPHS                                                                                                                              | 4. Improvements to SPHS                                                                                                                                                                                                                                                                        | 5. Sustaining or scaling change for SPHS | 6. Other |
|                             |      |                          |        | governments and health services; 2) environmental sustainability |                                                                  | capital allocation is not funded based on patient-centredness                                                                                      |                                                                                                                                                                                                                                                                                                |                                          |          |
| Knutson, D. J. 1997         | 1997 | United States of America | ED     |                                                                  | The issue of measurement after the funding period was terminated | Limitations in current models of chronic illness management, and the difference between thinking about and the reality of how clinical work occurs | Recognises important components of models for critical care: should be patient centred, have a critical illness management model, be conscious of minimising patient out-of-pocket expenses, consulting with the organisation, and recognising the link between clinical and research outcomes |                                          |          |



| <i>Article demographics</i>                 |      |           |        | <i>Reason for article inclusion and summary of results</i> |                                                                                                                                          |                                                     |                                                                                                                                                                                                                                                                                                                                               |                                                                                                                                    |          |
|---------------------------------------------|------|-----------|--------|------------------------------------------------------------|------------------------------------------------------------------------------------------------------------------------------------------|-----------------------------------------------------|-----------------------------------------------------------------------------------------------------------------------------------------------------------------------------------------------------------------------------------------------------------------------------------------------------------------------------------------------|------------------------------------------------------------------------------------------------------------------------------------|----------|
| Reference                                   | Year | Country   | Type * | 1. Definition of SPHS                                      | 2. Measuring SPHS                                                                                                                        | 3. Challenges to SPHS                               | 4. Improvements to SPHS                                                                                                                                                                                                                                                                                                                       | 5. Sustaining or scaling change for SPHS                                                                                           | 6. Other |
| Lega, F., Prenestini, A., Spurgeon, P. 2013 | 2013 | Worldwide | RA     |                                                            | Thirty-seven studies in a systematic review (both qualitative and quantitative were involved, and some had causal relationship analysis) | Rising costs, economic crises and ageing population | Recognise that the performance of healthcare organisations is correlated to management practices, leadership, engagement with professionals, management characteristics (e.g., training [doctors as managers are beneficial], background, career history), and organisational culture and management status. New technologies are also useful | Medical engagement is linked to better patient mortality rates, decreased serious incidents, maintains high levels of patient care |          |
| Lehoux P, Williams-Jones B,                 | 2008 | Worldwide | ED     | Recognising the importance                                 |                                                                                                                                          |                                                     |                                                                                                                                                                                                                                                                                                                                               |                                                                                                                                    |          |

| <i>Article demographics</i>           |      |                          |        | <i>Reason for article inclusion and summary of results</i>              |                                                                                                                                                                              |                       |                                                                                                                                                                                                                          |                                          |          |
|---------------------------------------|------|--------------------------|--------|-------------------------------------------------------------------------|------------------------------------------------------------------------------------------------------------------------------------------------------------------------------|-----------------------|--------------------------------------------------------------------------------------------------------------------------------------------------------------------------------------------------------------------------|------------------------------------------|----------|
| Reference                             | Year | Country                  | Type * | 1. Definition of SPHS                                                   | 2. Measuring SPHS                                                                                                                                                            | 3. Challenges to SPHS | 4. Improvements to SPHS                                                                                                                                                                                                  | 5. Sustaining or scaling change for SPHS | 6. Other |
| Miller F, Urbach D, Tailliez S. 2008  |      |                          |        | of being sustainable overtime, rather than creating for short-term gain |                                                                                                                                                                              |                       |                                                                                                                                                                                                                          |                                          |          |
| L, Goeree R, Levine M, et al. 2011    | 2011 | Canada                   | RA     |                                                                         | When post-drug interventions are being used clinically, there should be field evaluation studies conducted to ensure the efficacy and cost effectiveness of the intervention |                       | Coverage with evidence development (CED) is necessary, not to replace RCTs, but to gain the next level of knowledge about that intervention in clinical practice. It will also increase inter-disciplinary collaboration |                                          |          |
| Levine, S., S. O'Mahony, A. Baron, A. | 2017 | United States of America | EM     |                                                                         |                                                                                                                                                                              |                       | Interventions to improve palliative care (PC) in paediatric hospitals, and to                                                                                                                                            |                                          |          |

| <i>Article demographics</i>                                                |      |           |        | <i>Reason for article inclusion and summary of results</i> |                   |                                                                                                     |                                                                                                                                                                                                                                                                |                                                                                                                                                                                                                                  |                |
|----------------------------------------------------------------------------|------|-----------|--------|------------------------------------------------------------|-------------------|-----------------------------------------------------------------------------------------------------|----------------------------------------------------------------------------------------------------------------------------------------------------------------------------------------------------------------------------------------------------------------|----------------------------------------------------------------------------------------------------------------------------------------------------------------------------------------------------------------------------------|----------------|
| Reference                                                                  | Year | Country   | Type * | 1. Definition of SPHS                                      | 2. Measuring SPHS | 3. Challenges to SPHS                                                                               | 4. Improvements to SPHS                                                                                                                                                                                                                                        | 5. Sustaining or scaling change for SPHS                                                                                                                                                                                         | 6. Other       |
| Ansari, C. Deamant, J. Frader, I. Leyva, M. Marschke, and M. Preodor. 2017 |      |           |        |                                                            |                   |                                                                                                     | improve physician self-care                                                                                                                                                                                                                                    |                                                                                                                                                                                                                                  |                |
| Lewis S. 2007                                                              | 2007 | Canada    | ED     |                                                            |                   | Financial, ageing population, concern over the proportion of government spending used on healthcare | The challenge of learning from other countries, and recognising the context specific elements of the systems they have enforced, and appropriately contextualising to the Canadian context e.g., Europe pays doctors less than Canada, utilises more home care | Believes sustainability should not be the focus, but rather quality improvement, aligning incentives with goals, making excellence mandatory and reducing health disparities should be the goal for at least the next five years |                |
| Liaropoulos L,                                                             | 2015 | Worldwide | ED     |                                                            |                   | Ageing population, the                                                                              |                                                                                                                                                                                                                                                                |                                                                                                                                                                                                                                  | It was suggest |

| <i>Article demographics</i>                                                                |      |           |        | <i>Reason for article inclusion and summary of results</i> |                                                                                  |                                                                                                                                                                |                                                                                                                                                                                                         |                                          |                                                                |
|--------------------------------------------------------------------------------------------|------|-----------|--------|------------------------------------------------------------|----------------------------------------------------------------------------------|----------------------------------------------------------------------------------------------------------------------------------------------------------------|---------------------------------------------------------------------------------------------------------------------------------------------------------------------------------------------------------|------------------------------------------|----------------------------------------------------------------|
| Reference                                                                                  | Year | Country   | Type * | 1. Definition of SPHS                                      | 2. Measuring SPHS                                                                | 3. Challenges to SPHS                                                                                                                                          | 4. Improvements to SPHS                                                                                                                                                                                 | 5. Sustaining or scaling change for SPHS | 6. Other                                                       |
| Goranitis I. 2015                                                                          |      |           |        |                                                            |                                                                                  | financial stress placed on healthcare systems, and the question of who is to pay for this increased cost? (e.g., does retirement age remain the same or rise?) |                                                                                                                                                                                                         |                                          | ed that taxation should be a focus to contribute to healthcare |
| Lizarondo, L., C. Turnbull, T. Kroon, K. Grimmer, A. Bell, S. Kumar, M. McEvoy et al. 2016 | 2016 | Australia | EM     |                                                            | Using survey of Scott's 10 strategies for sustaining change in the health system |                                                                                                                                                                | Allied health respondents recognised that low- or no-impact interventions that cause little improvement or cause harm could be minimised, and by selecting care responses for comparative effectiveness |                                          |                                                                |
| Lozano I, Rondan J, Vegas JM,                                                              | 2016 | Spain     | ED     |                                                            |                                                                                  | Funding and support for ongoing professional                                                                                                                   |                                                                                                                                                                                                         |                                          |                                                                |

| <i>Article demographics</i>               |      |                          |       | <i>Reason for article inclusion and summary of results</i>                                     |                   |                                                                                                                                                  |                                                                                                                                                                                 |                                          |          |
|-------------------------------------------|------|--------------------------|-------|------------------------------------------------------------------------------------------------|-------------------|--------------------------------------------------------------------------------------------------------------------------------------------------|---------------------------------------------------------------------------------------------------------------------------------------------------------------------------------|------------------------------------------|----------|
| Reference                                 | Year | Country                  | Type* | 1. Definition of SPHS                                                                          | 2. Measuring SPHS | 3. Challenges to SPHS                                                                                                                            | 4. Improvements to SPHS                                                                                                                                                         | 5. Sustaining or scaling change for SPHS | 6. Other |
| Segovia E. 2016                           |      |                          |       |                                                                                                |                   | learning, recognising differences in health structures between countries to understand how recommendations are transferrable                     |                                                                                                                                                                                 |                                          |          |
| Mackenzie J. 2011                         | 2011 | United Kingdom           | ED    | Sustainable development meets the needs of the present whilst ensuring future needs can be met |                   | The challenge of getting the balance between environmental, social and economic sustainability right, and considering how these factors interact | Need to take a systems view of managing system risk, ensuring a more sustainable business system, and being strategic in the long term rather than focusing on short term gains |                                          |          |
| Magnan S, Fisher E, Kindig D, et al. 2012 | 2012 | United States of America | ED    |                                                                                                |                   | There are very few or no direct links between investing healthcare and establishing the social                                                   | The development of "health outcomes trust" organisations and accountable care organisations (ACOs) to work                                                                      |                                          |          |

| <i>Article demographics</i>   |      |                |        | <i>Reason for article inclusion and summary of results</i> |                     |                                                                                                                                                                                           |                                                                                                                                                                                |                                          |          |
|-------------------------------|------|----------------|--------|------------------------------------------------------------|---------------------|-------------------------------------------------------------------------------------------------------------------------------------------------------------------------------------------|--------------------------------------------------------------------------------------------------------------------------------------------------------------------------------|------------------------------------------|----------|
| Reference                     | Year | Country        | Type * | 1. Definition of SPHS                                      | 2. Measuring SPHS   | 3. Challenges to SPHS                                                                                                                                                                     | 4. Improvements to SPHS                                                                                                                                                        | 5. Sustaining or scaling change for SPHS | 6. Other |
|                               |      |                |        |                                                            |                     | determinants of health, and there is little communication between stakeholders in these different camps. Rising healthcare costs are also a concern                                       | to fulfil the triple aim and have sustainable funding. Community goal setting could also help to pay for population health                                                     |                                          |          |
| McGorry PD, Hamilton MP. 2016 | 2016 | Australia      | ED     |                                                            |                     | The challenges of implementing effective mental health reforms, including allowing access to early intervention with government funding, and funding with the NDIS for more complex cases | E-health giving the opportunity for a complementary role at all stages of illness, and the importance of research and evaluation in creating the most cost-effective solutions |                                          |          |
| McGrath, S. P., and           | 2015 | United Kingdom | EM     |                                                            | Dartmouth-Hitchcock |                                                                                                                                                                                           | The define-measure-analyse-                                                                                                                                                    | The last phase, 'control'                |          |

| <i>Article demographics</i>                                              |             |                          |               | <i>Reason for article inclusion and summary of results</i> |                            |                                                                                                                               |                                                                                             |                                                                                                                                                             |                 |
|--------------------------------------------------------------------------|-------------|--------------------------|---------------|------------------------------------------------------------|----------------------------|-------------------------------------------------------------------------------------------------------------------------------|---------------------------------------------------------------------------------------------|-------------------------------------------------------------------------------------------------------------------------------------------------------------|-----------------|
| <b>Reference</b>                                                         | <b>Year</b> | <b>Country</b>           | <b>Type *</b> | <b>1. Definition of SPHS</b>                               | <b>2. Measuring SPHS</b>   | <b>3. Challenges to SPHS</b>                                                                                                  | <b>4. Improvements to SPHS</b>                                                              | <b>5. Sustaining or scaling change for SPHS</b>                                                                                                             | <b>6. Other</b> |
| G. T. Blike. 2015                                                        |             |                          |               |                                                            | Value Institute Experience |                                                                                                                               | improve-control framework was developed to allow a problem-solving approach to challenges   | promotes the changes to be sustained through time                                                                                                           |                 |
| McIntosh E, Nagelkerk J, Vonderheid SC, Poole M, Dontje K, Pohl JM. 2003 | 2003        | United States of America | ED            |                                                            |                            | Recognition that nurse-managed centres often do not receive the necessary financial support for their centres to be continued | A financial advisory committee (FAC) could help improve financial outcomes in these centres | The FAC had meetings over three years and developed financial skills of the individuals                                                                     |                 |
| McVeigh J, MacLachlan M, Gilmore B, et al. 2016                          | 2016        | Worldwide                | RA, EM        |                                                            |                            |                                                                                                                               |                                                                                             | Participation of people with disabilities (service users) in policy development and the governance of that service to improve sustainability. Additionally, |                 |

| <i>Article demographics</i>                                                 |      |                          |        | <i>Reason for article inclusion and summary of results</i> |                                                                                                            |                                                                                                                                   |                         |                                                                                                                                                                                                                                                   |          |
|-----------------------------------------------------------------------------|------|--------------------------|--------|------------------------------------------------------------|------------------------------------------------------------------------------------------------------------|-----------------------------------------------------------------------------------------------------------------------------------|-------------------------|---------------------------------------------------------------------------------------------------------------------------------------------------------------------------------------------------------------------------------------------------|----------|
| Reference                                                                   | Year | Country                  | Type * | 1. Definition of SPHS                                      | 2. Measuring SPHS                                                                                          | 3. Challenges to SPHS                                                                                                             | 4. Improvements to SPHS | 5. Sustaining or scaling change for SPHS                                                                                                                                                                                                          | 6. Other |
|                                                                             |      |                          |        |                                                            |                                                                                                            |                                                                                                                                   |                         | aligning or integrating new models of care with existing models can strengthen program delivery and implementation of policies for rehabilitation. Support from professionals in the field and stakeholders is also beneficial for sustainability |          |
| Molfenter, T., D. Gustafson, C. Kilo, A. Bhattacharya, and J. Olsson. 2005. | 2005 | United States of America | EM     |                                                            | Measure the self-reported and faculty-reported the success and sustenance of changes to their organisation | The model used was not able to predict sustainability of interventions or programs, but this may be due to the time period or the |                         |                                                                                                                                                                                                                                                   |          |



| <i>Article demographics</i> |      |         |       | <i>Reason for article inclusion and summary of results</i> |                   |                               |                                                                                                                                                                                                                                                                                                                                                                     |                                          |          |
|-----------------------------|------|---------|-------|------------------------------------------------------------|-------------------|-------------------------------|---------------------------------------------------------------------------------------------------------------------------------------------------------------------------------------------------------------------------------------------------------------------------------------------------------------------------------------------------------------------|------------------------------------------|----------|
| Reference                   | Year | Country | Type* | 1. Definition of SPHS                                      | 2. Measuring SPHS | 3. Challenges to SPHS         | 4. Improvements to SPHS                                                                                                                                                                                                                                                                                                                                             | 5. Sustaining or scaling change for SPHS | 6. Other |
|                             |      |         |       |                                                            |                   | sustainability of the measure |                                                                                                                                                                                                                                                                                                                                                                     |                                          |          |
| Nagle LM, Pitts BM. 2012    | 2012 | Canada  | ED    |                                                            |                   |                               | Recommendations: raise public awareness of services available, improve access to primary healthcare, empower patients about their care, use incentives to encourage serving in under-served areas, create an integrated health record service, devise alternatives to the fee-for-service model, increase funding for community services, give health professionals |                                          |          |

| <i>Article demographics</i>                           |      |           |        | <i>Reason for article inclusion and summary of results</i> |                                                                                                                                                                        |                                                                                                                   |                                                                                                                                                                                  |                                          |          |
|-------------------------------------------------------|------|-----------|--------|------------------------------------------------------------|------------------------------------------------------------------------------------------------------------------------------------------------------------------------|-------------------------------------------------------------------------------------------------------------------|----------------------------------------------------------------------------------------------------------------------------------------------------------------------------------|------------------------------------------|----------|
| Reference                                             | Year | Country   | Type * | 1. Definition of SPHS                                      | 2. Measuring SPHS                                                                                                                                                      | 3. Challenges to SPHS                                                                                             | 4. Improvements to SPHS                                                                                                                                                          | 5. Sustaining or scaling change for SPHS | 6. Other |
|                                                       |      |           |        |                                                            |                                                                                                                                                                        |                                                                                                                   | communication and language training, emphasise healthy lifestyles, ensure pharmaceuticals are affordable, decrease wait time and increase access for services for mental illness |                                          |          |
| Pacifico Silva H, Lehoux P, Miller FA, Denis JL. 2018 | 2018 | Worldwide | ED     |                                                            | Development of the responsible innovations for health (RIH) framework which identifies interventions that respond to the context and support equitable and sustainable | Ensuring Responsible Innovations in Health (RIH), involving consideration of sustainability and equity challenges |                                                                                                                                                                                  |                                          |          |

| <i>Article demographics</i> |      |         |        | <i>Reason for article inclusion and summary of results</i> |                                                                                                                                     |                                                                                                                                                                                                    |                                                                                                                                                                                                     |                                          |          |
|-----------------------------|------|---------|--------|------------------------------------------------------------|-------------------------------------------------------------------------------------------------------------------------------------|----------------------------------------------------------------------------------------------------------------------------------------------------------------------------------------------------|-----------------------------------------------------------------------------------------------------------------------------------------------------------------------------------------------------|------------------------------------------|----------|
| Reference                   | Year | Country | Type * | 1. Definition of SPHS                                      | 2. Measuring SPHS                                                                                                                   | 3. Challenges to SPHS                                                                                                                                                                              | 4. Improvements to SPHS                                                                                                                                                                             | 5. Sustaining or scaling change for SPHS | 6. Other |
|                             |      |         |        |                                                            | health service. It includes 5 domains: 1. population health; 2. health system; 3. Economic; 4. organisational; and 5. environmental |                                                                                                                                                                                                    |                                                                                                                                                                                                     |                                          |          |
| Pencheon D. 2013            | 2013 | England | ED     |                                                            | Measuring preventable illness and unplanned hospital admissions as system failures until proven otherwise                           | Understanding the changing needs (demographic, social, cultural) of the changing population; understanding how the rapid growth of science and technology can change outcomes; the need for public | Utilising technology to promote sustainable and personalised healthcare, and improving the prevention of illness rather than treating the illness once it arises e.g., increasing physical activity |                                          |          |

| <i>Article demographics</i>                                      |      |                          |       | <i>Reason for article inclusion and summary of results</i> |                                                                                                                                                  |                                                                                  |                                                                                   |                                          |          |
|------------------------------------------------------------------|------|--------------------------|-------|------------------------------------------------------------|--------------------------------------------------------------------------------------------------------------------------------------------------|----------------------------------------------------------------------------------|-----------------------------------------------------------------------------------|------------------------------------------|----------|
| Reference                                                        | Year | Country                  | Type* | 1. Definition of SPHS                                      | 2. Measuring SPHS                                                                                                                                | 3. Challenges to SPHS                                                            | 4. Improvements to SPHS                                                           | 5. Sustaining or scaling change for SPHS | 6. Other |
|                                                                  |      |                          |       |                                                            |                                                                                                                                                  | services to act within environmental boundaries and increased levels of scrutiny |                                                                                   |                                          |          |
| Peric, N., M. M. Hofmarcher-Holzacker, and J. Simon. 2017.       | 2017 | European Union Countries | RA    |                                                            | Does not answer how we measure sustainability but the methods or 'actors and actions' by which sustainable health system performance is assessed |                                                                                  |                                                                                   |                                          |          |
| Pronovost, P. J., C. G. Holzmueller, T. Callender, R. Demski, L. | 2016 | United States of America | ED    |                                                            | Measuring performance of the Johns Hopkins Hospital (JHH) over a number of years compared to                                                     |                                                                                  | Phase 3 of the program involved a peer education program for health professionals |                                          |          |

| <i>Article demographics</i>                                            |      |                                                     |        | <i>Reason for article inclusion and summary of results</i>                                                                                                        |                                               |                                                         |                         |                                          |          |
|------------------------------------------------------------------------|------|-----------------------------------------------------|--------|-------------------------------------------------------------------------------------------------------------------------------------------------------------------|-----------------------------------------------|---------------------------------------------------------|-------------------------|------------------------------------------|----------|
| Reference                                                              | Year | Country                                             | Type * | 1. Definition of SPHS                                                                                                                                             | 2. Measuring SPHS                             | 3. Challenges to SPHS                                   | 4. Improvements to SPHS | 5. Sustaining or scaling change for SPHS | 6. Other |
| Winner, R. Day, J. M. Austin, S. M. Berenholtz, and M. R. Miller. 2016 |      |                                                     |        |                                                                                                                                                                   | national guidelines                           |                                                         |                         |                                          |          |
| Rees, G. H. 2014.                                                      | 2014 | United States of America, United Kingdom, Australia | EM     | "Implementation to effect continuous improvement, by either setting a cycle or programming for the next unit on the patient journey to undertake Lean activities" |                                               |                                                         |                         |                                          |          |
| Robertson J, Walkom                                                    | 2011 | Australia                                           | EM     |                                                                                                                                                                   | Surveyed both GPs, specialists, and consumers | Both doctors and consumers recognise the rising cost of |                         |                                          |          |

| <i>Article demographics</i>    |             |                          |               | <i>Reason for article inclusion and summary of results</i> |                                                                                                  |                                                                                                                                                                                                                                                                           |                                |                                                                                                                                                                                                                                     |                 |
|--------------------------------|-------------|--------------------------|---------------|------------------------------------------------------------|--------------------------------------------------------------------------------------------------|---------------------------------------------------------------------------------------------------------------------------------------------------------------------------------------------------------------------------------------------------------------------------|--------------------------------|-------------------------------------------------------------------------------------------------------------------------------------------------------------------------------------------------------------------------------------|-----------------|
| <b>Reference</b>               | <b>Year</b> | <b>Country</b>           | <b>Type *</b> | <b>1. Definition of SPHS</b>                               | <b>2. Measuring SPHS</b>                                                                         | <b>3. Challenges to SPHS</b>                                                                                                                                                                                                                                              | <b>4. Improvements to SPHS</b> | <b>5. Sustaining or scaling change for SPHS</b>                                                                                                                                                                                     | <b>6. Other</b> |
| EJ, Henry DA. 2011             |             |                          |               |                                                            | (patients) in the health system, and asked them to identify the potential problems in the system | healthcare, but doctors are less concerned than consumers regarding the sustainability of the health system                                                                                                                                                               |                                |                                                                                                                                                                                                                                     |                 |
| Robertson TM, Lofgren RP. 2015 | 2015        | United States of America | ED            |                                                            |                                                                                                  | A large percentage (80%) of health spending is spent on a small proportion (20%) of the population due to complex episodes of care. The challenge is therefore to learn to address these in a more cost-effective manner, but this poses difficulties e.g., it is hard to |                                | "The national health care agenda has been heavily influenced by the assumptions that disease prevention and the general promotion of "population health" will be sufficient to reduce health care spending to a sustainable level." |                 |

| <i>Article demographics</i>                              |      |         |       | <i>Reason for article inclusion and summary of results</i>                                                                                                                                                  |                   |                                                                                                                                                                                                                                                                                                 |                                                            |                                          |          |
|----------------------------------------------------------|------|---------|-------|-------------------------------------------------------------------------------------------------------------------------------------------------------------------------------------------------------------|-------------------|-------------------------------------------------------------------------------------------------------------------------------------------------------------------------------------------------------------------------------------------------------------------------------------------------|------------------------------------------------------------|------------------------------------------|----------|
| Reference                                                | Year | Country | Type* | 1. Definition of SPHS                                                                                                                                                                                       | 2. Measuring SPHS | 3. Challenges to SPHS                                                                                                                                                                                                                                                                           | 4. Improvements to SPHS                                    | 5. Sustaining or scaling change for SPHS | 6. Other |
|                                                          |      |         |       |                                                                                                                                                                                                             |                   | decrease costs through conducting outpatient clinics                                                                                                                                                                                                                                            |                                                            |                                          |          |
| Rosenberg-Yunger ZR, Daar AS, Singer PA, Martin DK. 2008 | 2008 | Canada  | ED    | Sustainability of the health system “means ensuring that sufficient resources are available over the long term to provide timely access to quality services that address Canadians’ evolving health needs.” |                   | The rising cost of pharmaceuticals and biopharmaceuticals, the complicated process by which drugs get approved for funding and use in developed countries, and the time-consuming alternatives (e.g., the Special Access Program in Canada). This leads to moral questions about the legitimacy | A mechanism to involve more stakeholders in the discussion |                                          |          |

| <i>Article demographics</i> |      |                          |        | <i>Reason for article inclusion and summary of results</i> |                                             |                                                                                     |                                                                                                                                                |                                                                                                                                                                                                                                      |          |
|-----------------------------|------|--------------------------|--------|------------------------------------------------------------|---------------------------------------------|-------------------------------------------------------------------------------------|------------------------------------------------------------------------------------------------------------------------------------------------|--------------------------------------------------------------------------------------------------------------------------------------------------------------------------------------------------------------------------------------|----------|
| Reference                   | Year | Country                  | Type * | 1. Definition of SPHS                                      | 2. Measuring SPHS                           | 3. Challenges to SPHS                                                               | 4. Improvements to SPHS                                                                                                                        | 5. Sustaining or scaling change for SPHS                                                                                                                                                                                             | 6. Other |
|                             |      |                          |        |                                                            |                                             | and fairness of applying for drugs, especially new and expensive biopharmaceuticals |                                                                                                                                                |                                                                                                                                                                                                                                      |          |
| Rosser, M. 2006             | 2006 | Canada                   | ED     |                                                            |                                             |                                                                                     | The Healthcare Materials Management Services (HMMS) created in 1997 and its success hinged on the collaboration between the hospitals involved | Sustaining change is thought to be attributed to executive funding, leadership, collaboration, openness of providers to the process, support of front-line clinical leaders, and development of a unique entity with its own culture |          |
| Scheirer MA. 2005           | 2005 | United States of America | RA     | Sustaining a program or initiative that                    | Sustainability can fall into 3 measures: 1. | Challenge of funding only for short periods (3-                                     |                                                                                                                                                | The authors suggest that the expectation that                                                                                                                                                                                        |          |



| <i>Article demographics</i>             |      |                          |        | <i>Reason for article inclusion and summary of results</i>                                               |                                                                                                                                                                                                                                                                              |                                                                                                                                                                                                       |                                                         |                                                                                                                                                                     |          |
|-----------------------------------------|------|--------------------------|--------|----------------------------------------------------------------------------------------------------------|------------------------------------------------------------------------------------------------------------------------------------------------------------------------------------------------------------------------------------------------------------------------------|-------------------------------------------------------------------------------------------------------------------------------------------------------------------------------------------------------|---------------------------------------------------------|---------------------------------------------------------------------------------------------------------------------------------------------------------------------|----------|
| Reference                               | Year | Country                  | Type * | 1. Definition of SPHS                                                                                    | 2. Measuring SPHS                                                                                                                                                                                                                                                            | 3. Challenges to SPHS                                                                                                                                                                                 | 4. Improvements to SPHS                                 | 5. Sustaining or scaling change for SPHS                                                                                                                            | 6. Other |
|                                         |      |                          |        | had previously been developed and maintained after the initial funding period or other impetus had ended | health benefits continue post-funding (individual level outcomes); 2. continuation of program activities post-intervention (organisation level outcomes); 3. relates to changes in community capacity to promote health post-intervention/funding (community level outcomes) | 5 years) and the subsequent need to source funding. Also challenging is the uniqueness of context, whereby each project is influenced by its context and what programs or activities have preceded it |                                                         | a new project will be sustainable after a 3-year funding project may be overly optimistic (therefore that it is hard to find funding opportunities after that time) |          |
| Schwann, N. M., K. A. Bretz, S. Eid, T. | 2011 | United States of America | EM     |                                                                                                          |                                                                                                                                                                                                                                                                              |                                                                                                                                                                                                       | Decrease hospital acquired infections through point-of- | Sustaining changes from an intervention                                                                                                                             |          |

| <i>Article demographics</i>                               |             |                |               | <i>Reason for article inclusion and summary of results</i> |                          |                                                                                                                                                                                                                                                                                                             |                                                                                                                                                                                                          |                                                                                                                                                                                                               |                 |
|-----------------------------------------------------------|-------------|----------------|---------------|------------------------------------------------------------|--------------------------|-------------------------------------------------------------------------------------------------------------------------------------------------------------------------------------------------------------------------------------------------------------------------------------------------------------|----------------------------------------------------------------------------------------------------------------------------------------------------------------------------------------------------------|---------------------------------------------------------------------------------------------------------------------------------------------------------------------------------------------------------------|-----------------|
| <b>Reference</b>                                          | <b>Year</b> | <b>Country</b> | <b>Type *</b> | <b>1. Definition of SPHS</b>                               | <b>2. Measuring SPHS</b> | <b>3. Challenges to SPHS</b>                                                                                                                                                                                                                                                                                | <b>4. Improvements to SPHS</b>                                                                                                                                                                           | <b>5. Sustaining or scaling change for SPHS</b>                                                                                                                                                               | <b>6. Other</b> |
| Burger, D.<br>Fry, F.<br>Ackler, P.<br>Evans et al. 2011. |             |                |               |                                                            |                          |                                                                                                                                                                                                                                                                                                             | care electronic prompts (POCEPs)                                                                                                                                                                         | over a two-year period                                                                                                                                                                                        |                 |
| Scott IA. 2006                                            | 2006        | Australia      | ED            |                                                            |                          | Baby boomers getting older with comorbidities and decreased quality of life, the 'worried well', new technologies, the demand for new and further treatments, the influence of the media (e.g., "miracle cures"), juggling a finite health budget, threats of global warming, and deciding which treatments | Training patients with counselling and behavioural strategies to take more control over their own care, encouraging non-traditional caregivers to do some forms of care if found to be equally effective | Abolishing state and federal boundaries in funding and creating a new federal system, having each patient with a GP responsible for their care, linking healthcare databases with a unique patient identifier |                 |

| <i>Article demographics</i>  |             |                |               | <i>Reason for article inclusion and summary of results</i>                                                                                                                                                                    |                                                                                                                                                                                                                                                                                               |                                                                   |                                |                                                 |                 |
|------------------------------|-------------|----------------|---------------|-------------------------------------------------------------------------------------------------------------------------------------------------------------------------------------------------------------------------------|-----------------------------------------------------------------------------------------------------------------------------------------------------------------------------------------------------------------------------------------------------------------------------------------------|-------------------------------------------------------------------|--------------------------------|-------------------------------------------------|-----------------|
| <b>Reference</b>             | <b>Year</b> | <b>Country</b> | <b>Type *</b> | <b>1. Definition of SPHS</b>                                                                                                                                                                                                  | <b>2. Measuring SPHS</b>                                                                                                                                                                                                                                                                      | <b>3. Challenges to SPHS</b>                                      | <b>4. Improvements to SPHS</b> | <b>5. Sustaining or scaling change for SPHS</b> | <b>6. Other</b> |
|                              |             |                |               |                                                                                                                                                                                                                               |                                                                                                                                                                                                                                                                                               | should be subsidised                                              |                                |                                                 |                 |
| Sepehri A, Chernomas R. 2004 | 2004        | Canada         | ED            | Acknowledges that different fields have different definitions of sustainability, and that these definitions tend to focus on resources and the capacity of the public sector to finance current and future health expenditure | Fiscal sustainability has been measured through the percentage of provincial and territorial budget allocation for healthcare, but this acts on two assumptions. 1) providers are assumed to respond to needs, and 2) the needs are assumed to reflect the current state of medical knowledge | Threat to sustainability is the uncertainty of government funding |                                |                                                 |                 |

| <i>Article demographics</i>                             |             |                |               | <i>Reason for article inclusion and summary of results</i>                                                                                                                                                          |                                                                                                                                                                                                               |                                           |                                                                                                                                                                                                       |                                                 |                 |
|---------------------------------------------------------|-------------|----------------|---------------|---------------------------------------------------------------------------------------------------------------------------------------------------------------------------------------------------------------------|---------------------------------------------------------------------------------------------------------------------------------------------------------------------------------------------------------------|-------------------------------------------|-------------------------------------------------------------------------------------------------------------------------------------------------------------------------------------------------------|-------------------------------------------------|-----------------|
| <b>Reference</b>                                        | <b>Year</b> | <b>Country</b> | <b>Type *</b> | <b>1. Definition of SPHS</b>                                                                                                                                                                                        | <b>2. Measuring SPHS</b>                                                                                                                                                                                      | <b>3. Challenges to SPHS</b>              | <b>4. Improvements to SPHS</b>                                                                                                                                                                        | <b>5. Sustaining or scaling change for SPHS</b> | <b>6. Other</b> |
| Shaw J, Wong I, Griffin B, Robertson M, Bhatia RS. 2017 | 2017        | Canada         | EM            |                                                                                                                                                                                                                     |                                                                                                                                                                                                               | "Increasingly complex patient population" | Emphasis must be placed on sustainability in order to protect the universal public healthcare system. "Need for comprehensive health system planning"                                                 |                                                 |                 |
| Shigayeva A, Coker RJ. 2015                             | 2015        | Worldwide      | ED            | Sustainability is the system's resilience. From a public health perspective, sustainability is defined in relation to whether the benefit to stakeholders is sustained overtime. Financial sustainability and being | Several frameworks have been suggested, which measure determinants or dimensions of sustainability. They mostly do not consider efficiency, which is an important component of sustainability. Underrepresent |                                           | Five programmatic components in disease control programs that are important for sustainability: leadership, capacity, interactions (notions of integration), flexibility/adaptability and performance |                                                 |                 |

| <i>Article demographics</i>                                                            |      |                          |       | <i>Reason for article inclusion and summary of results</i> |                                                                                                         |                                                                                                   |                                                         |                                          |          |
|----------------------------------------------------------------------------------------|------|--------------------------|-------|------------------------------------------------------------|---------------------------------------------------------------------------------------------------------|---------------------------------------------------------------------------------------------------|---------------------------------------------------------|------------------------------------------|----------|
| Reference                                                                              | Year | Country                  | Type* | 1. Definition of SPHS                                      | 2. Measuring SPHS                                                                                       | 3. Challenges to SPHS                                                                             | 4. Improvements to SPHS                                 | 5. Sustaining or scaling change for SPHS | 6. Other |
|                                                                                        |      |                          |       | responsive to the consumer wishes are also important       | ted field: of 108 studies in systematic review, only two looked at SPHS (Lafond 1995a; Pammolli et al.) |                                                                                                   |                                                         |                                          |          |
| Solon, O., K. Woo, S. A. Quimbo, R. Shimkhada, J. Florentino, and J. W. Peabody. 2009. | 2009 | Philippines              | EM    |                                                            | Developed Q* to measure quality of hospital performance across a range of facilities                    |                                                                                                   |                                                         |                                          |          |
| Sonnenreich P, Geisler L. 2016                                                         | 2016 | United States of America | ED    |                                                            | Financial issues of rising healthcare costs and decreasing affordability                                | Financial unsustainability in the system, (e.g., that 30% of healthcare spending is wasteful) and | The initiation of a value-based formulary in pharmacies |                                          |          |

| <i>Article demographics</i>                                                |      |                          |        | <i>Reason for article inclusion and summary of results</i> |                            |                                                                                                                                                                                                                                                                          |                                                                                                                        |                                                                                                       |          |
|----------------------------------------------------------------------------|------|--------------------------|--------|------------------------------------------------------------|----------------------------|--------------------------------------------------------------------------------------------------------------------------------------------------------------------------------------------------------------------------------------------------------------------------|------------------------------------------------------------------------------------------------------------------------|-------------------------------------------------------------------------------------------------------|----------|
| Reference                                                                  | Year | Country                  | Type * | 1. Definition of SPHS                                      | 2. Measuring SPHS          | 3. Challenges to SPHS                                                                                                                                                                                                                                                    | 4. Improvements to SPHS                                                                                                | 5. Sustaining or scaling change for SPHS                                                              | 6. Other |
|                                                                            |      |                          |        |                                                            |                            | trying to balance this with allowing patients to access new expensive medicines. But a new way to look at it would be to analyse the <i>value</i> of the drug. There is also a problem with patient adherence to medications, especially when they have a higher expense |                                                                                                                        |                                                                                                       |          |
| Stockdale, S. E., J. Zuchowski, L. V. Rubenstein, N. Sapir, E. M. Yano, L. | 2018 | United States of America | EM     |                                                            | Through interview analysis | Barriers to sustained improvement included a lack of collaborative working between local practice leaders; another                                                                                                                                                       | Through the introduction of quality care councils and an evidence-based quality-improvement project aimed at improving | Assessed project completion and spread and found it was important to have mechanisms by which to hold |          |

| <i>Article demographics</i>                                                  |      |             |       | <i>Reason for article inclusion and summary of results</i> |                   |                                                                                                                                                                                                                                                         |                                                                                                                                                                                                                                                                       |                                                                                               |          |
|------------------------------------------------------------------------------|------|-------------|-------|------------------------------------------------------------|-------------------|---------------------------------------------------------------------------------------------------------------------------------------------------------------------------------------------------------------------------------------------------------|-----------------------------------------------------------------------------------------------------------------------------------------------------------------------------------------------------------------------------------------------------------------------|-----------------------------------------------------------------------------------------------|----------|
| Reference                                                                    | Year | Country     | Type* | 1. Definition of SPHS                                      | 2. Measuring SPHS | 3. Challenges to SPHS                                                                                                                                                                                                                                   | 4. Improvements to SPHS                                                                                                                                                                                                                                               | 5. Sustaining or scaling change for SPHS                                                      | 6. Other |
| Altman, J. J. Fickel, S. McDougall, T. Dresselhaus, and A. B. Hamilton. 2016 |      |             |       |                                                            |                   | challenge is balancing time that could be spent on patients to be attributed to the 'extra work' of the project                                                                                                                                         | disciplinary leadership, aligning frontline improvement innovation and assessing implementation designs                                                                                                                                                               | frontline innovations would be suitable for spread (but does not research the impact of this) |          |
| Stoelwinder JU, Paolucci F. 2009                                             | 2009 | Netherlands | ED    |                                                            |                   | Growth rate of the Australian health system is financially unsustainable, with the Australian Medical Association, as well as state governments, lobbying for more funding. It is also likely that there will be significant resistance by stakeholders | Being inspired by the Netherlands new system of health reform, including policy objectives of durability (sustainability), solidarity (equity), choice, quality and efficiency. Additionally, there are tools to keep citizens engaged in their healthcare decisions, |                                                                                               |          |

| <i>Article demographics</i> |      |           |        | <i>Reason for article inclusion and summary of results</i> |                   |                                                                                                                                                                                                                                     |                                                                                                                                                                                                                            |                                          |          |
|-----------------------------|------|-----------|--------|------------------------------------------------------------|-------------------|-------------------------------------------------------------------------------------------------------------------------------------------------------------------------------------------------------------------------------------|----------------------------------------------------------------------------------------------------------------------------------------------------------------------------------------------------------------------------|------------------------------------------|----------|
| Reference                   | Year | Country   | Type * | 1. Definition of SPHS                                      | 2. Measuring SPHS | 3. Challenges to SPHS                                                                                                                                                                                                               | 4. Improvements to SPHS                                                                                                                                                                                                    | 5. Sustaining or scaling change for SPHS | 6. Other |
|                             |      |           |        |                                                            |                   | when there is suggestion of Australian health system reform                                                                                                                                                                         | including the choice of 15 health insurance providers. To avoid insurers seeking out low-risk clients, there has been a complex risk-equalisation scheme put in place                                                      |                                          |          |
| Stoelwind er JU. 2009       | 2009 | Australia | ED     |                                                            |                   | The need to address both financial and political sustainability in the health system (e.g., with rising healthcare costs, and the political structures to deal with tax payment rather than consumer payment for the health system) | Governance needs to be established for the "healthy Australia accord", the federal government should progressively take over funding responsibilities for Medicare, and a funding model called "Medicare select" should be |                                          |          |



| <i>Article demographics</i> |      |           |        | <i>Reason for article inclusion and summary of results</i> |                                                                                                                                                                                                                                                     |                                                                                                                                                                                                                                          |                                                                                       |                                          |          |
|-----------------------------|------|-----------|--------|------------------------------------------------------------|-----------------------------------------------------------------------------------------------------------------------------------------------------------------------------------------------------------------------------------------------------|------------------------------------------------------------------------------------------------------------------------------------------------------------------------------------------------------------------------------------------|---------------------------------------------------------------------------------------|------------------------------------------|----------|
| Reference                   | Year | Country   | Type * | 1. Definition of SPHS                                      | 2. Measuring SPHS                                                                                                                                                                                                                                   | 3. Challenges to SPHS                                                                                                                                                                                                                    | 4. Improvements to SPHS                                                               | 5. Sustaining or scaling change for SPHS | 6. Other |
|                             |      |           |        |                                                            |                                                                                                                                                                                                                                                     |                                                                                                                                                                                                                                          | established whereby public and private health models compete to allow consumer choice |                                          |          |
| Stuart N, Adams J. 2007     | 2007 | Canada    | ED     |                                                            | Cost of healthcare that outpaces economic growth, and a way of conceptualising this is in a comparison to Maslow's hierarchy of needs, with different levels of health need (but this adds to questions of how health need and benefit are defined) | Spending on healthcare is being pushed to unsustainable levels meaning that, in order to be sustained, spending must be taken away from other areas e.g., education, infrastructure; or increase revenue; or decrease cost of healthcare |                                                                                       |                                          |          |
| Taylor M. 2007              | 2007 | Australia | ED     |                                                            |                                                                                                                                                                                                                                                     |                                                                                                                                                                                                                                          | The expansion and development                                                         |                                          |          |

| <i>Article demographics</i>                                                 |      |                          |        | <i>Reason for article inclusion and summary of results</i>                                                  |                                                                                                          |                                                                                                                            |                                                                                                               |                                                                                                                                    |          |
|-----------------------------------------------------------------------------|------|--------------------------|--------|-------------------------------------------------------------------------------------------------------------|----------------------------------------------------------------------------------------------------------|----------------------------------------------------------------------------------------------------------------------------|---------------------------------------------------------------------------------------------------------------|------------------------------------------------------------------------------------------------------------------------------------|----------|
| Reference                                                                   | Year | Country                  | Type * | 1. Definition of SPHS                                                                                       | 2. Measuring SPHS                                                                                        | 3. Challenges to SPHS                                                                                                      | 4. Improvements to SPHS                                                                                       | 5. Sustaining or scaling change for SPHS                                                                                           | 6. Other |
|                                                                             |      |                          |        |                                                                                                             |                                                                                                          |                                                                                                                            | of the role of nurse practitioners (NPs) e.g. By improving access to healthcare in remote and rural Australia |                                                                                                                                    |          |
| Thompson RE. 1998                                                           | 1998 | United States of America | ED     | Sustainability defined as meeting the needs of the present whilst guarding resources for future generations |                                                                                                          | Financial and moral factors that influence physician decisions, which have ultimately been influenced by politics and laws |                                                                                                               | "Managed care" needs to mature and evolve through supporting teaching, research, patient care and care for their staff             |          |
| Tricco, A. C., H. M. Ashoor, R. Cardoso, H. MacDonald, E. Cogo, M. Kastner, | 2016 | Canada                   | RA     |                                                                                                             | Scoping review to see what knowledge could be gained from studies aiming to use knowledge translation to |                                                                                                                            |                                                                                                               | Specifically examined articles that had follow-up one or more years after the initial test, or continued beyond the funding period |          |

| <i>Article demographics</i>                                      |      |         |        | <i>Reason for article inclusion and summary of results</i> |                                                      |                       |                                                                                                                                                                                                                                                                                                         |                                          |          |
|------------------------------------------------------------------|------|---------|--------|------------------------------------------------------------|------------------------------------------------------|-----------------------|---------------------------------------------------------------------------------------------------------------------------------------------------------------------------------------------------------------------------------------------------------------------------------------------------------|------------------------------------------|----------|
| Reference                                                        | Year | Country | Type * | 1. Definition of SPHS                                      | 2. Measuring SPHS                                    | 3. Challenges to SPHS | 4. Improvements to SPHS                                                                                                                                                                                                                                                                                 | 5. Sustaining or scaling change for SPHS | 6. Other |
| L. Perrier, A. McKibbin, J. M. Grimshaw, and S. E. Straus. 2016. |      |         |        |                                                            | improve health of patients managing chronic diseases |                       |                                                                                                                                                                                                                                                                                                         |                                          |          |
| Tsasis P. 2009                                                   | 2009 | Canada  | ED     |                                                            |                                                      |                       | The potential of improving access to home care for older patients with one or more chronic illnesses, through improving funding for these programs. Additionally, interdisciplinary teamwork and having a patient-centred approach to care has the potential to improve health system sustainability by |                                          |          |

| <i>Article demographics</i>                    |      |           |       | <i>Reason for article inclusion and summary of results</i> |                   |                                                                                                                                                                                                                                                                                                      |                                                                       |                                                                                                                                                                                                                                                                                                                             |          |
|------------------------------------------------|------|-----------|-------|------------------------------------------------------------|-------------------|------------------------------------------------------------------------------------------------------------------------------------------------------------------------------------------------------------------------------------------------------------------------------------------------------|-----------------------------------------------------------------------|-----------------------------------------------------------------------------------------------------------------------------------------------------------------------------------------------------------------------------------------------------------------------------------------------------------------------------|----------|
| Reference                                      | Year | Country   | Type* | 1. Definition of SPHS                                      | 2. Measuring SPHS | 3. Challenges to SPHS                                                                                                                                                                                                                                                                                | 4. Improvements to SPHS                                               | 5. Sustaining or scaling change for SPHS                                                                                                                                                                                                                                                                                    | 6. Other |
|                                                |      |           |       |                                                            |                   |                                                                                                                                                                                                                                                                                                      | minimising drug interactions and conflicting advice given to patients |                                                                                                                                                                                                                                                                                                                             |          |
| Van de Pas R, Hill PS, Hammonds R, et al. 2017 | 2017 | Worldwide | ED    |                                                            |                   | The current sustainable development goals (SDGs) are superficial, and more political debate on structure, policy and agency are needed to bridge the gap and overcome existing health injustices. Also noted that many of the SDGs, although not specifically health related, have impacts on health |                                                                       | Stewardship embodying the establishment of norms, values and rules to guide policy development and advocacy for global health across sectors. Also recognised as important is the production of global public goods, the mobilization of global solidarity and the management of externalities e.g., governments, states or |          |

| <i>Article demographics</i>    |      |           |       | <i>Reason for article inclusion and summary of results</i> |                   |                                                                                                                                                                                                                                                                                                         |                                                               |                                          |          |
|--------------------------------|------|-----------|-------|------------------------------------------------------------|-------------------|---------------------------------------------------------------------------------------------------------------------------------------------------------------------------------------------------------------------------------------------------------------------------------------------------------|---------------------------------------------------------------|------------------------------------------|----------|
| Reference                      | Year | Country   | Type* | 1. Definition of SPHS                                      | 2. Measuring SPHS | 3. Challenges to SPHS                                                                                                                                                                                                                                                                                   | 4. Improvements to SPHS                                       | 5. Sustaining or scaling change for SPHS | 6. Other |
|                                |      |           |       |                                                            |                   |                                                                                                                                                                                                                                                                                                         |                                                               | transnational bodies                     |          |
| Veillard J, Denny K. 2014      | 2014 | Canada    | ED    |                                                            |                   | The majority of healthcare spending is on a small proportion of patients                                                                                                                                                                                                                                | Need for more consistency in practice and delivery methods    |                                          |          |
| Wakerman J, Humphreys JS. 2011 | 2011 | Australia | RA    |                                                            |                   | Addressing rural and remote areas in Australia. These areas are known for their deficits e.g., high morbidity and mortality, workplace shortages, lack of services and high cost of care delivery. Systems need to realise there is no one-size-fits-all solution, and changes need to align the on the | A systematic approach is needed to improve primary healthcare |                                          |          |

| <i>Article demographics</i>    |      |           |       | <i>Reason for article inclusion and summary of results</i> |                   |                                                                                                                                                                                                                |                                                                                                                                                                                                                                                                                                                 |                                          |          |
|--------------------------------|------|-----------|-------|------------------------------------------------------------|-------------------|----------------------------------------------------------------------------------------------------------------------------------------------------------------------------------------------------------------|-----------------------------------------------------------------------------------------------------------------------------------------------------------------------------------------------------------------------------------------------------------------------------------------------------------------|------------------------------------------|----------|
| Reference                      | Year | Country   | Type* | 1. Definition of SPHS                                      | 2. Measuring SPHS | 3. Challenges to SPHS                                                                                                                                                                                          | 4. Improvements to SPHS                                                                                                                                                                                                                                                                                         | 5. Sustaining or scaling change for SPHS | 6. Other |
|                                |      |           |       |                                                            |                   | micro-scale health service level as well as the macro-scale external policy environment                                                                                                                        |                                                                                                                                                                                                                                                                                                                 |                                          |          |
| Wakerman J, Humphreys JS. 2013 | 2013 | Australia | ED    |                                                            |                   | Tension between national health workforce policy initiatives and demographic, socioeconomic and political forces. Overall, healthcare service access and the health status are worse in non-metropolitan areas | The aim is to provide accessible, affordable, appropriate healthcare regardless of geography. Potential improvement in the number of doctors in regional and rural areas if there is a change in the culture of thinking of rural areas as negative, and through the increased number of medical students being |                                          |          |

| <i>Article demographics</i>                                   |      |         |        | <i>Reason for article inclusion and summary of results</i> |                   |                                                          |                                                                                                                                                                                                                                                                                     |                                                                     |          |
|---------------------------------------------------------------|------|---------|--------|------------------------------------------------------------|-------------------|----------------------------------------------------------|-------------------------------------------------------------------------------------------------------------------------------------------------------------------------------------------------------------------------------------------------------------------------------------|---------------------------------------------------------------------|----------|
| Reference                                                     | Year | Country | Type * | 1. Definition of SPHS                                      | 2. Measuring SPHS | 3. Challenges to SPHS                                    | 4. Improvements to SPHS                                                                                                                                                                                                                                                             | 5. Sustaining or scaling change for SPHS                            | 6. Other |
|                                                               |      |         |        |                                                            |                   |                                                          | trained appropriately for regional and remote work, and addressing the other workforces that collaborate with the rural services (e.g., funding, infrastructure, governance), and increasing the accountability of the health service through agreed indicators and output measures |                                                                     |          |
| Woodward, G. L., A. Iverson, R. Harvey, and P. G. Blake. 2015 | 2015 | Canada  | ED     |                                                            |                   | Recognises the challenge of bridging policy and practice |                                                                                                                                                                                                                                                                                     | Requires leadership, transparency, accountability and communication |          |

| <i>Article demographics</i>               |      |                           |       | <i>Reason for article inclusion and summary of results</i> |                                     |                                                                       |                         |                                                                                                                                                                                                                                                                                                      |          |
|-------------------------------------------|------|---------------------------|-------|------------------------------------------------------------|-------------------------------------|-----------------------------------------------------------------------|-------------------------|------------------------------------------------------------------------------------------------------------------------------------------------------------------------------------------------------------------------------------------------------------------------------------------------------|----------|
| Reference                                 | Year | Country                   | Type* | 1. Definition of SPHS                                      | 2. Measuring SPHS                   | 3. Challenges to SPHS                                                 | 4. Improvements to SPHS | 5. Sustaining or scaling change for SPHS                                                                                                                                                                                                                                                             | 6. Other |
| Wutzke, S., M. Benton, and R. Verma. 2016 | 2016 | Australia and New Zealand | EM    |                                                            |                                     |                                                                       |                         | Four general factors were found to be present in successful interventions: 1. having a sound business case for change; 2. being prepared for the change process and adapting to different contexts; 3. promoting change through stakeholders; 4. ensuring support through the implementation process |          |
| Zhao Y, Russell DJ, Guthridge             | 2017 | Australia                 | EM    |                                                            | Regression analyses of payroll data | Managing fluctuations in funding and the translation of this to staff |                         |                                                                                                                                                                                                                                                                                                      |          |



| <i>Article demographics</i>                  |             |                |               | <i>Reason for article inclusion and summary of results</i> |                          |                                                                                        |                                                                                                                                                                                                |                                                 |                 |
|----------------------------------------------|-------------|----------------|---------------|------------------------------------------------------------|--------------------------|----------------------------------------------------------------------------------------|------------------------------------------------------------------------------------------------------------------------------------------------------------------------------------------------|-------------------------------------------------|-----------------|
| <b>Reference</b>                             | <b>Year</b> | <b>Country</b> | <b>Type *</b> | <b>1. Definition of SPHS</b>                               | <b>2. Measuring SPHS</b> | <b>3. Challenges to SPHS</b>                                                           | <b>4. Improvements to SPHS</b>                                                                                                                                                                 | <b>5. Sustaining or scaling change for SPHS</b> | <b>6. Other</b> |
| S, et al. 2017                               |             |                |               |                                                            |                          |                                                                                        |                                                                                                                                                                                                |                                                 |                 |
| Pisco L, Pinto LF. 2020                      | 2020        | Portugal       | ED            |                                                            |                          | Comorbidity and increasing age                                                         | Suggests that primary healthcare and preventive care (e.g., maternal health, disease prevention, vaccines etc.) is a strong investment to increase productivity and strengthen social cohesion |                                                 |                 |
| Ganann R, Peacock S, Garnett A, et al. 2019. | 2019        | Canada         | ED            |                                                            |                          | Discusses how an ageing population presses the need for sustainable healthcare system. | Capacity building through health services and policy research training in the following competencies: understanding health systems and the policy-making process, integrated knowledge         |                                                 |                 |

| <i>Article demographics</i> |             |                |               | <i>Reason for article inclusion and summary of results</i> |                          |                              |                                                                                                                                                                                                                                                                                                                                                                                                                    |                                                 |                 |
|-----------------------------|-------------|----------------|---------------|------------------------------------------------------------|--------------------------|------------------------------|--------------------------------------------------------------------------------------------------------------------------------------------------------------------------------------------------------------------------------------------------------------------------------------------------------------------------------------------------------------------------------------------------------------------|-------------------------------------------------|-----------------|
| <b>Reference</b>            | <b>Year</b> | <b>Country</b> | <b>Type *</b> | <b>1. Definition of SPHS</b>                               | <b>2. Measuring SPHS</b> | <b>3. Challenges to SPHS</b> | <b>4. Improvements to SPHS</b>                                                                                                                                                                                                                                                                                                                                                                                     | <b>5. Sustaining or scaling change for SPHS</b> | <b>6. Other</b> |
|                             |             |                |               |                                                            |                          |                              | transition activities tailored to the specific needs of primary healthcare clinicians and policy making, networking, negotiation an dialogue, project management, interdisciplinary collaborations among patients researchers health practitioners and policy makers, change management implementation, leadership mentorships and collaboration, analysis and evaluation of health related policies and programs, |                                                 |                 |

| <i>Article demographics</i>                    |      |         |       | <i>Reason for article inclusion and summary of results</i>           |                                                                             |                                                                                                                                 |                                                                                                                                                                  |                                          |          |
|------------------------------------------------|------|---------|-------|----------------------------------------------------------------------|-----------------------------------------------------------------------------|---------------------------------------------------------------------------------------------------------------------------------|------------------------------------------------------------------------------------------------------------------------------------------------------------------|------------------------------------------|----------|
| Reference                                      | Year | Country | Type* | 1. Definition of SPHS                                                | 2. Measuring SPHS                                                           | 3. Challenges to SPHS                                                                                                           | 4. Improvements to SPHS                                                                                                                                          | 5. Sustaining or scaling change for SPHS | 6. Other |
|                                                |      |         |       |                                                                      |                                                                             |                                                                                                                                 | ensuring capacity for meaningful patient engagement, mobilising existing expertise, support careers, building capacity to apply research to real-world problems. |                                          |          |
| Jessup RL, O'Connor DA, Putrik P, et al. 2019. | 2018 | Global  | ED    |                                                                      |                                                                             | Increasing pressures from ageing population, increasingly prevalent chronic disease, higher cost of tests, workforce shortages. |                                                                                                                                                                  |                                          |          |
| Vainieri M, Noto G, Ferre F, Rosella LC. 2020. | 2020 | Global  | ED    | Defines sustainability as the ability of a health system to meet the | broadly discusses how performance monitoring or measurement isn't currently | Overall short-term bias and perspective of the health system impacts establishing                                               | Challenges listed include the need for improvement in data collection management, the need to adopt a patient-based                                              |                                          |          |

| <i>Article demographics</i>                                              |      |         |        | <i>Reason for article inclusion and summary of results</i> |                                                                                                                                                      |                                                                                                                         |                                                                 |                                          |          |
|--------------------------------------------------------------------------|------|---------|--------|------------------------------------------------------------|------------------------------------------------------------------------------------------------------------------------------------------------------|-------------------------------------------------------------------------------------------------------------------------|-----------------------------------------------------------------|------------------------------------------|----------|
| Reference                                                                | Year | Country | Type * | 1. Definition of SPHS                                      | 2. Measuring SPHS                                                                                                                                    | 3. Challenges to SPHS                                                                                                   | 4. Improvements to SPHS                                         | 5. Sustaining or scaling change for SPHS | 6. Other |
|                                                                          |      |         |        | needs of present and future.                               | sensitive enough to monitor health system sustainability                                                                                             | health system sustainability                                                                                            | perspective, and how performance measures are used in practice. |                                          |          |
| Lo Sardo DR, Thurner S, Sorger J, Duftschmid G, Endel G, Klimek P. 2019. | 2019 | Austria | EM     |                                                            | Measures resilience, however, the paper argues that to be sustainable health systems must be resilient                                               | Rising costs, chronic conditions, and ageing                                                                            | To counter unsustainability health systems must be resilient    |                                          |          |
| Williams I, Allen K, Plahe G. 2019.                                      | 2019 | England | EM     |                                                            | Rationing of finances and how this occurs in reality, with reference to the 'seven forms of rationing' (and how this can be applied to see if health | Recognition that there are perceived barriers to timely release of central funding, and the need to prioritise spending |                                                                 |                                          |          |

| <i>Article demographics</i>                         |      |                                      |       | <i>Reason for article inclusion and summary of results</i> |                                                                           |                                                                                                                                                                                        |                                                                                                        |                                          |          |
|-----------------------------------------------------|------|--------------------------------------|-------|------------------------------------------------------------|---------------------------------------------------------------------------|----------------------------------------------------------------------------------------------------------------------------------------------------------------------------------------|--------------------------------------------------------------------------------------------------------|------------------------------------------|----------|
| Reference                                           | Year | Country                              | Type* | 1. Definition of SPHS                                      | 2. Measuring SPHS                                                         | 3. Challenges to SPHS                                                                                                                                                                  | 4. Improvements to SPHS                                                                                | 5. Sustaining or scaling change for SPHS | 6. Other |
|                                                     |      |                                      |       |                                                            | systems are sustainable) - e.g., dilution via spreading thin of resources |                                                                                                                                                                                        |                                                                                                        |                                          |          |
| Ammentorp J, Bigi S, Silverman J, et al. 2021.      | 2021 | Australia, Ireland, Austria, Denmark | EM    |                                                            |                                                                           | Challenges to implementing programs: convincing investors, involving stakeholders, locating change agents                                                                              | Communication training programs à improving competencies and knowledge related to patient centred care |                                          |          |
| Braithwaite J, Mannion R, Matsuyama Y, et al. 2018. | 2018 | Global                               | ED    |                                                            |                                                                           | Common pressures or stressors are manifesting in every healthcare system; these include scarcity of financial and staff resources, expectations of the public, and maintaining healthy |                                                                                                        |                                          |          |

| <i>Article demographics</i> |      |         |        | <i>Reason for article inclusion and summary of results</i>                                                                                          |                   |                                                                                           |                                                                                                                                                                                                                                                                                                                               |                                          |          |
|-----------------------------|------|---------|--------|-----------------------------------------------------------------------------------------------------------------------------------------------------|-------------------|-------------------------------------------------------------------------------------------|-------------------------------------------------------------------------------------------------------------------------------------------------------------------------------------------------------------------------------------------------------------------------------------------------------------------------------|------------------------------------------|----------|
| Reference                   | Year | Country | Type * | 1. Definition of SPHS                                                                                                                               | 2. Measuring SPHS | 3. Challenges to SPHS                                                                     | 4. Improvements to SPHS                                                                                                                                                                                                                                                                                                       | 5. Sustaining or scaling change for SPHS | 6. Other |
|                             |      |         |        |                                                                                                                                                     |                   | relationships with multiple stakeholders                                                  |                                                                                                                                                                                                                                                                                                                               |                                          |          |
| Buttigieg SC. 2019.         | 2019 | Global  | ED     | Sustainability in healthcare defined as “key task for health policy-makers to withstand social, financial, and ecological pressures and challenges” |                   | Challenges discussed include service delivery, human resources, leadership and governance | “Among these include an open innovation strategy that redesigns sharing intellectual property, resources, and data – and therefore introducing flexibility, easier accessibility to libraries and collections of molecular entities, as well as opportunities for external researchers to work alongside company scientists.” |                                          |          |
| Byskov J, Maluka S,         | 2019 | Global  | RA     |                                                                                                                                                     |                   |                                                                                           |                                                                                                                                                                                                                                                                                                                               | “The debate on defining and              |          |

| <i>Article demographics</i> |             |                |               | <i>Reason for article inclusion and summary of results</i> |                          |                              |                                |                                                                                                                                                                                                                                                                                                                                                                                         |                 |
|-----------------------------|-------------|----------------|---------------|------------------------------------------------------------|--------------------------|------------------------------|--------------------------------|-----------------------------------------------------------------------------------------------------------------------------------------------------------------------------------------------------------------------------------------------------------------------------------------------------------------------------------------------------------------------------------------|-----------------|
| <b>Reference</b>            | <b>Year</b> | <b>Country</b> | <b>Type *</b> | <b>1. Definition of SPHS</b>                               | <b>2. Measuring SPHS</b> | <b>3. Challenges to SPHS</b> | <b>4. Improvements to SPHS</b> | <b>5. Sustaining or scaling change for SPHS</b>                                                                                                                                                                                                                                                                                                                                         | <b>6. Other</b> |
| Marchal B, et al. 2019.     |             |                |               |                                                            |                          |                              |                                | operationalizing more sustainable systems approaches by more strongly including a priority setting and a decision-making process guidance raises the question whether (1) technical evidence-based information is most important and can be improved by more participatory value and specific context-based approaches (Baltussen et al., 2013) or (2) the participatory democratically |                 |

| <i>Article demographics</i>                    |      |         |        | <i>Reason for article inclusion and summary of results</i> |                   |                                                                                                                             |                                                                                                                                                                                                                                                         |                                                                                                                                 |          |
|------------------------------------------------|------|---------|--------|------------------------------------------------------------|-------------------|-----------------------------------------------------------------------------------------------------------------------------|---------------------------------------------------------------------------------------------------------------------------------------------------------------------------------------------------------------------------------------------------------|---------------------------------------------------------------------------------------------------------------------------------|----------|
| Reference                                      | Year | Country | Type * | 1. Definition of SPHS                                      | 2. Measuring SPHS | 3. Challenges to SPHS                                                                                                       | 4. Improvements to SPHS                                                                                                                                                                                                                                 | 5. Sustaining or scaling change for SPHS                                                                                        | 6. Other |
|                                                |      |         |        |                                                            |                   |                                                                                                                             |                                                                                                                                                                                                                                                         | based approaches (Biehl and Petryna, 2013; Daniels et al., 2015) are most important, but need support from technical evidence.” |          |
| O'Brien N, Li R, Isaranuwatchai W, et al. 2019 | 2019 | Global  | ED     |                                                            |                   | Paper looking at HTA as a means of improving HSS. Cites confusion over definition of HTA as a barrier to its implementation | "Health technology assessment (HTA) is a multi-disciplinary exercise for assessing the clinical and cost-effectiveness of technologies in the form mainly of programs of health (and sometimes social) care, together with their associated structural, |                                                                                                                                 |          |



| <i>Article demographics</i>                          |      |         |       | <i>Reason for article inclusion and summary of results</i> |                   |                                                                                                                                                   |                                                                                                                                                                                                                       |                                          |          |
|------------------------------------------------------|------|---------|-------|------------------------------------------------------------|-------------------|---------------------------------------------------------------------------------------------------------------------------------------------------|-----------------------------------------------------------------------------------------------------------------------------------------------------------------------------------------------------------------------|------------------------------------------|----------|
| Reference                                            | Year | Country | Type* | 1. Definition of SPHS                                      | 2. Measuring SPHS | 3. Challenges to SPHS                                                                                                                             | 4. Improvements to SPHS                                                                                                                                                                                               | 5. Sustaining or scaling change for SPHS | 6. Other |
|                                                      |      |         |       |                                                            |                   |                                                                                                                                                   | procedural and implementation arrangements". Governments consequently need to take responsibility for the development of strong and sustainable health systems                                                        |                                          |          |
| Hanney S, Kanya L, Pokhrel S, Jones T, Boaz A. 2020. | 2020 | Global  | RA    |                                                            |                   | Research funding is a major barrier to HS research and therefore health systems cannot be improved. Discusses waste in research and fragmentation | "WHO Health Evidence Network Synthesis Reports. What is the evidence on policies, interventions and tools for establishing and/or strengthening national health research systems and their effectiveness? Copenhagen: |                                          |          |

| <i>Article demographics</i>                             |      |         |             | <i>Reason for article inclusion and summary of results</i> |                   |                             |                                                                                                                                                                                  |                                          |          |
|---------------------------------------------------------|------|---------|-------------|------------------------------------------------------------|-------------------|-----------------------------|----------------------------------------------------------------------------------------------------------------------------------------------------------------------------------|------------------------------------------|----------|
| Reference                                               | Year | Country | Type *      | 1. Definition of SPHS                                      | 2. Measuring SPHS | 3. Challenges to SPHS       | 4. Improvements to SPHS                                                                                                                                                          | 5. Sustaining or scaling change for SPHS | 6. Other |
|                                                         |      |         |             |                                                            |                   |                             | WHO Regional Office for Europe"                                                                                                                                                  |                                          |          |
| Bentley C, Peacock S, Abelson J, et al. 2019.           | 2019 | Canada  | EM          |                                                            |                   | Expensive cancer treatment. | The paper calls to use cost effective decisions and involve patients when making cancer funding decisions. Also, to disinvestment if that treatment becomes less effective later |                                          |          |
| Braithwaite J, Vincent C, Nicklin W, Amalberti R. 2019. | 2019 | Global  | ED          |                                                            |                   |                             | We will need to reflect a reasons health journey overall in evaluations and treatment                                                                                            |                                          |          |
| Braithwaite J, Zurynski Y, Ludlow K, Holt J, Augustsso  | 2019 | Global  | EM protocol | Defines fiscal sustainability, equality                    |                   |                             |                                                                                                                                                                                  |                                          |          |

| <i>Article demographics</i>                                                            |      |         |        | <i>Reason for article inclusion and summary of results</i> |                   |                       |                         |                                                                                                                                                                                                                                                                                                                                                             |          |
|----------------------------------------------------------------------------------------|------|---------|--------|------------------------------------------------------------|-------------------|-----------------------|-------------------------|-------------------------------------------------------------------------------------------------------------------------------------------------------------------------------------------------------------------------------------------------------------------------------------------------------------------------------------------------------------|----------|
| Reference                                                                              | Year | Country | Type * | 1. Definition of SPHS                                      | 2. Measuring SPHS | 3. Challenges to SPHS | 4. Improvements to SPHS | 5. Sustaining or scaling change for SPHS                                                                                                                                                                                                                                                                                                                    | 6. Other |
| n H, Campbell M. 2019.                                                                 |      |         |        |                                                            |                   |                       |                         |                                                                                                                                                                                                                                                                                                                                                             |          |
| Rudnicka E, Napierała P, Podfigurna A, Męczekalski B, Smolarczyk R, Grymowicz M. 2020. | 2020 | Global  | ED     |                                                            |                   |                       | An ageing population    | establishing a platform of innovation and change, support country planning and action, collect better global data on health ageing, promoting research that addresses the current and future needs of older people, aligning health systems to the needs of older people, laying the foundations for a long-term care system in every country, Ensuring the |          |

| <i>Article demographics</i> |      |         |        | <i>Reason for article inclusion and summary of results</i> |                                                                                                                                              |                       |                         |                                                                                                                                                                                                                |          |
|-----------------------------|------|---------|--------|------------------------------------------------------------|----------------------------------------------------------------------------------------------------------------------------------------------|-----------------------|-------------------------|----------------------------------------------------------------------------------------------------------------------------------------------------------------------------------------------------------------|----------|
| Reference                   | Year | Country | Type * | 1. Definition of SPHS                                      | 2. Measuring SPHS                                                                                                                            | 3. Challenges to SPHS | 4. Improvements to SPHS | 5. Sustaining or scaling change for SPHS                                                                                                                                                                       | 6. Other |
|                             |      |         |        |                                                            |                                                                                                                                              |                       |                         | human resources necessary for integrated care, undertaking a global campaign to combat ageism, defining an economic case for investment, Enhancing the global network for age-friendly cities and communities. |          |
| Shen H, Sui Y, Fu Y. 2020.  | 2020 | Global  | EM     |                                                            | This paper looks at apply social choice theory and the Stochastic Multicriteria Acceptability Analysis for group decision making (SMAA-2) to |                       |                         |                                                                                                                                                                                                                |          |

| <i>Article demographics</i> |             |                |               | <i>Reason for article inclusion and summary of results</i> |                                                                                                                                                                                                                                                                                                                 |                              |                                |                                                 |                 |
|-----------------------------|-------------|----------------|---------------|------------------------------------------------------------|-----------------------------------------------------------------------------------------------------------------------------------------------------------------------------------------------------------------------------------------------------------------------------------------------------------------|------------------------------|--------------------------------|-------------------------------------------------|-----------------|
| <b>Reference</b>            | <b>Year</b> | <b>Country</b> | <b>Type *</b> | <b>1. Definition of SPHS</b>                               | <b>2. Measuring SPHS</b>                                                                                                                                                                                                                                                                                        | <b>3. Challenges to SPHS</b> | <b>4. Improvements to SPHS</b> | <b>5. Sustaining or scaling change for SPHS</b> | <b>6. Other</b> |
|                             |             |                |               |                                                            | measure the value of health systems. The measurement consistent of three metrics; access, satisfaction, and efficiency, and considers individual preference to each. The article suggested that measuring value is the ultimate goal of modern healthcare and can assist in building sustainable health systems |                              |                                |                                                 |                 |

| <i>Article demographics</i>                           |      |         |        | <i>Reason for article inclusion and summary of results</i> |                   |                       |                                                                                                                                                                                                                                                            |                                          |          |
|-------------------------------------------------------|------|---------|--------|------------------------------------------------------------|-------------------|-----------------------|------------------------------------------------------------------------------------------------------------------------------------------------------------------------------------------------------------------------------------------------------------|------------------------------------------|----------|
| Reference                                             | Year | Country | Type * | 1. Definition of SPHS                                      | 2. Measuring SPHS | 3. Challenges to SPHS | 4. Improvements to SPHS                                                                                                                                                                                                                                    | 5. Sustaining or scaling change for SPHS | 6. Other |
| Fridell M, Edwin S, von Schreeb J, Saulnier DD. 2020. | 2020 | Global  | RA     |                                                            |                   |                       | Implies that resilience is essential to a sustainable healthcare system. Common factors contributing to resilience included: financing, highly skilled workforce, continuous collection of information at the population level, leadership and governance, |                                          |          |

| <i>Article demographics</i> |      |         |        | <i>Reason for article inclusion and summary of results</i> |                   |                                                                                                                                                                      |                                                                                                                                      |                                                                                                                                                |          |
|-----------------------------|------|---------|--------|------------------------------------------------------------|-------------------|----------------------------------------------------------------------------------------------------------------------------------------------------------------------|--------------------------------------------------------------------------------------------------------------------------------------|------------------------------------------------------------------------------------------------------------------------------------------------|----------|
| Reference                   | Year | Country | Type * | 1. Definition of SPHS                                      | 2. Measuring SPHS | 3. Challenges to SPHS                                                                                                                                                | 4. Improvements to SPHS                                                                                                              | 5. Sustaining or scaling change for SPHS                                                                                                       | 6. Other |
|                             |      |         |        |                                                            |                   |                                                                                                                                                                      | medical products (such as vaccines and affordable medications), and service delivery.                                                |                                                                                                                                                |          |
| Walsh K. 2019.              | 2019 | Global  | ED     |                                                            |                   | Limited budget: "Health systems strengthening is a challenge – how can we improve access, coverage, quality and efficiency, and still keep within a limited budget?" | Developing human resource potential through e-learning                                                                               | Broadening e-learning through online simulations, build on access (e.g., expand to mobile devices and apps)                                    |          |
| De Santis M. 2019.          | 2019 | Global  | RA     |                                                            |                   | Change is expensive and incremental, integrated care is hard to quantify                                                                                             | Suggests that integrated care is a solution to system fragmentation, efficiency, and high costs in chronic disease and rare diseases | To achieve and scale integrated care there must be political support and commitment, strong governance, stakeholder engagement, organisational |          |

| <i>Article demographics</i>               |      |                |        | <i>Reason for article inclusion and summary of results</i> |                   |                                                                                                   |                                                                                                                                                                                |                                                                                                                                                                                                                                |          |
|-------------------------------------------|------|----------------|--------|------------------------------------------------------------|-------------------|---------------------------------------------------------------------------------------------------|--------------------------------------------------------------------------------------------------------------------------------------------------------------------------------|--------------------------------------------------------------------------------------------------------------------------------------------------------------------------------------------------------------------------------|----------|
| Reference                                 | Year | Country        | Type * | 1. Definition of SPHS                                      | 2. Measuring SPHS | 3. Challenges to SPHS                                                                             | 4. Improvements to SPHS                                                                                                                                                        | 5. Sustaining or scaling change for SPHS                                                                                                                                                                                       | 6. Other |
|                                           |      |                |        |                                                            |                   |                                                                                                   |                                                                                                                                                                                | change, leadership, workforce education and training, patient focus/empowerment, financing incentives, ICT infrastructure and solutions, monitoring/evaluation system                                                          |          |
| Ferrelli RM, Fantini B, Taruscio D. 2019. | 2019 | European Union | ED     |                                                            |                   | Affordability and financing of equal access and healthcare delivery for people with rare diseases | Discusses networking or rare diseases providers to improve knowledge and healthcare delivery in the EU. The paper also suggests that resilience is important to sustainability | Discusses levers about to build a sustainable health system for rare diseases. Levers include organisation structure, partnerships, workforce, knowledge development, leadership and governance, and country specific context. |          |



| <i>Article demographics</i>                            |             |                |               | <i>Reason for article inclusion and summary of results</i> |                          |                                                                                                           |                                                                                                                                                                                                                                                                                                                                                                                                                              |                                                 |                 |
|--------------------------------------------------------|-------------|----------------|---------------|------------------------------------------------------------|--------------------------|-----------------------------------------------------------------------------------------------------------|------------------------------------------------------------------------------------------------------------------------------------------------------------------------------------------------------------------------------------------------------------------------------------------------------------------------------------------------------------------------------------------------------------------------------|-------------------------------------------------|-----------------|
| <b>Reference</b>                                       | <b>Year</b> | <b>Country</b> | <b>Type *</b> | <b>1. Definition of SPHS</b>                               | <b>2. Measuring SPHS</b> | <b>3. Challenges to SPHS</b>                                                                              | <b>4. Improvements to SPHS</b>                                                                                                                                                                                                                                                                                                                                                                                               | <b>5. Sustaining or scaling change for SPHS</b> | <b>6. Other</b> |
| Steenhuis S, Struijs J, Koolman X, Ket J, E VDH. 2020. | 2020        | Global         | RA            |                                                            |                          | Discusses challenges in implementing and changing payment methods to address health system sustainability | "Our study shows that bundled payment contracts affect a broad range of health system actors, so their design and implementation should not be approached as merely the introduction of a new contracting model, but as part of a broader transformation to a more sustainable, value-based health care system. This approach should not focus on the volume and price of separate health care products but on the full care |                                                 |                 |

| <i>Article demographics</i> |      |                |        | <i>Reason for article inclusion and summary of results</i> |                   |                                                                                                                                                                                                              |                                                                                                                 |                                                                                                                                                                                                                                                                                |          |
|-----------------------------|------|----------------|--------|------------------------------------------------------------|-------------------|--------------------------------------------------------------------------------------------------------------------------------------------------------------------------------------------------------------|-----------------------------------------------------------------------------------------------------------------|--------------------------------------------------------------------------------------------------------------------------------------------------------------------------------------------------------------------------------------------------------------------------------|----------|
| Reference                   | Year | Country        | Type * | 1. Definition of SPHS                                      | 2. Measuring SPHS | 3. Challenges to SPHS                                                                                                                                                                                        | 4. Improvements to SPHS                                                                                         | 5. Sustaining or scaling change for SPHS                                                                                                                                                                                                                                       | 6. Other |
|                             |      |                |        |                                                            |                   |                                                                                                                                                                                                              | cycle of patients and the integral costs and outcomes associated with it"                                       |                                                                                                                                                                                                                                                                                |          |
| Nikolić B. 2020.            | 2020 | European Union | ED     |                                                            |                   | Discusses the fiscal sustainability of health systems, how spending has outpaced GDP and uses Baumols theory and the human factor in healthcare (that much of it cannot be automated) causing costs to rise. | This paper focuses on market competition and competition law between providers and how this could improve costs | This paper discusses how healthcare providers can be considered undertakings through international case law and through guidelines e.g., separation of each activity performed, separation of management activities and calculate the economic nature of each of service item. |          |

| <i>Article demographics</i> |             |                |               | <i>Reason for article inclusion and summary of results</i> |                          |                                                                                                                                                                                                                   |                                                                                                                                                                                                                                                                                                                                                                                                      |                                                 |                 |
|-----------------------------|-------------|----------------|---------------|------------------------------------------------------------|--------------------------|-------------------------------------------------------------------------------------------------------------------------------------------------------------------------------------------------------------------|------------------------------------------------------------------------------------------------------------------------------------------------------------------------------------------------------------------------------------------------------------------------------------------------------------------------------------------------------------------------------------------------------|-------------------------------------------------|-----------------|
| <b>Reference</b>            | <b>Year</b> | <b>Country</b> | <b>Type *</b> | <b>1. Definition of SPHS</b>                               | <b>2. Measuring SPHS</b> | <b>3. Challenges to SPHS</b>                                                                                                                                                                                      | <b>4. Improvements to SPHS</b>                                                                                                                                                                                                                                                                                                                                                                       | <b>5. Sustaining or scaling change for SPHS</b> | <b>6. Other</b> |
| Niraula S. 2019             | 2019        | Canada         | ED            |                                                            |                          | Discusses how cancer medication funding is at odds, and needs to be balanced against, the fiscal sustainability of the healthcare system in Canada. A challenge in this sector is that cancer drugs are expensive | To address the high cost and maintain fiscal sustainability the authors suggest to: improve collaborations and decrease duplication of efforts in R&D, minimise the conflicts of interest among members, involve citizens into decision making process, reconsider the funding model to an outcomes based funding model, incentivise cheaper alternatives (generic drugs) and penalise branded ones. |                                                 |                 |

| <i>Article demographics</i> |      |                  |           | <i>Reason for article inclusion and summary of results</i>                                                                                                                                                                                                                |                   |                                                                                                                                           |                         |                                          |          |
|-----------------------------|------|------------------|-----------|---------------------------------------------------------------------------------------------------------------------------------------------------------------------------------------------------------------------------------------------------------------------------|-------------------|-------------------------------------------------------------------------------------------------------------------------------------------|-------------------------|------------------------------------------|----------|
| Reference                   | Year | Country          | Type*     | 1. Definition of SPHS                                                                                                                                                                                                                                                     | 2. Measuring SPHS | 3. Challenges to SPHS                                                                                                                     | 4. Improvements to SPHS | 5. Sustaining or scaling change for SPHS | 6. Other |
| Pereno A, Eriksson D. 2020. | 2020 | Nordic Countries | EM and RA | “In spite of the different ways to define sustainable healthcare systems, and regardless of whether the three-pillar model or the integrated understanding of sustainability is applied, all approaches seem to have in common that a comprehensive approach with a long- |                   | In the introduction the paper mentions rising costs, chronic disease, societal pressure such as informed and sometimes demanding patients |                         |                                          |          |

| <i>Article demographics</i>              |      |                |           | <i>Reason for article inclusion and summary of results</i>                                                                                         |                                                                                          |                       |                                                                                                                                                                                    |                                                                        |          |
|------------------------------------------|------|----------------|-----------|----------------------------------------------------------------------------------------------------------------------------------------------------|------------------------------------------------------------------------------------------|-----------------------|------------------------------------------------------------------------------------------------------------------------------------------------------------------------------------|------------------------------------------------------------------------|----------|
| Reference                                | Year | Country        | Type *    | 1. Definition of SPHS                                                                                                                              | 2. Measuring SPHS                                                                        | 3. Challenges to SPHS | 4. Improvements to SPHS                                                                                                                                                            | 5. Sustaining or scaling change for SPHS                               | 6. Other |
|                                          |      |                |           | term focus and a need to balance economic, social, and ecological interests needs to be used in the discussion of sustainable healthcare systems.” |                                                                                          |                       |                                                                                                                                                                                    |                                                                        |          |
| Bogaert P, van Oers H, Van Oyen H. 2018. | 2018 | European Union | EM and RA |                                                                                                                                                    | By developing a sustainable health information infrastructure for monitoring performance |                       | A unified information system with clear governance, central coordination and distributed implementation across EU countries will support system performance - provide unified data | Vague - it talks mainly about the structure of the information systems |          |

| <i>Article demographics</i>                     |             |                |              | <i>Reason for article inclusion and summary of results</i> |                          |                                                                                                                                                                                                                                                                                                                                                          |                                                                                                          |                                                 |                 |
|-------------------------------------------------|-------------|----------------|--------------|------------------------------------------------------------|--------------------------|----------------------------------------------------------------------------------------------------------------------------------------------------------------------------------------------------------------------------------------------------------------------------------------------------------------------------------------------------------|----------------------------------------------------------------------------------------------------------|-------------------------------------------------|-----------------|
| <b>Reference</b>                                | <b>Year</b> | <b>Country</b> | <b>Type*</b> | <b>1. Definition of SPHS</b>                               | <b>2. Measuring SPHS</b> | <b>3. Challenges to SPHS</b>                                                                                                                                                                                                                                                                                                                             | <b>4. Improvements to SPHS</b>                                                                           | <b>5. Sustaining or scaling change for SPHS</b> | <b>6. Other</b> |
| Wurcel V, Cicchetti A, Garrison L, et al. 2019. | 2019        | Global         | ED           |                                                            |                          | financial implications of value of diagnostic information (VODI), including supporting cost containment, allowing timely interventions and preventing disease progression and long-term cost. This requires rapid technological pathology testing and turnaround times to allow rapid clinical decisions (e.g., point-of-care testing, e-health records) | the need to identify and leverage the benefits of the value of diagnostic information for health systems |                                                 |                 |

| <i>Article demographics</i>                                      |      |           |        | <i>Reason for article inclusion and summary of results</i>       |                            |                                                                                                                 |                                                                                                                                                 |                                                                                                                                           |          |
|------------------------------------------------------------------|------|-----------|--------|------------------------------------------------------------------|----------------------------|-----------------------------------------------------------------------------------------------------------------|-------------------------------------------------------------------------------------------------------------------------------------------------|-------------------------------------------------------------------------------------------------------------------------------------------|----------|
| Reference                                                        | Year | Country   | Type * | 1. Definition of SPHS                                            | 2. Measuring SPHS          | 3. Challenges to SPHS                                                                                           | 4. Improvements to SPHS                                                                                                                         | 5. Sustaining or scaling change for SPHS                                                                                                  | 6. Other |
| Cunningham FC, Ranmuthugala G, Westbrook JI, Braithwaite J. 2019 | 2019 | Australia | ED     |                                                                  | Via the framework/network. |                                                                                                                 |                                                                                                                                                 |                                                                                                                                           |          |
| Embi PJ, Richesson R, Tenenbaum J, et al. 2019                   | 2019 | USA       | ED     | Learning health system                                           |                            |                                                                                                                 | the research results should extend far beyond the awardees who conduct the research, and there should be collaboration between funding agencies | that federal funding agencies should see investment in an initiative as an ongoing strategic investment rather than a time-limited option |          |
| Enticott J, Braaf S, Johnson A, Jones A, Teede HJ. 2020.         | 2020 | Australia | EM     | Links to a learning health system relying on continuous learning |                            | challenge of engaging multiple stakeholders in governance, research and within the health system itself; having | creating a vibrant learning culture with top down and bottom-up support; clinician engagement and inclusion; transparency around patient        | importance of consistent investment/funding overtime                                                                                      |          |

| <i>Article demographics</i> |      |                            |        | <i>Reason for article inclusion and summary of results</i>                                                                                 |                   |                                                                                                                                           |                                                                                                                                      |                                                             |          |
|-----------------------------|------|----------------------------|--------|--------------------------------------------------------------------------------------------------------------------------------------------|-------------------|-------------------------------------------------------------------------------------------------------------------------------------------|--------------------------------------------------------------------------------------------------------------------------------------|-------------------------------------------------------------|----------|
| Reference                   | Year | Country                    | Type * | 1. Definition of SPHS                                                                                                                      | 2. Measuring SPHS | 3. Challenges to SPHS                                                                                                                     | 4. Improvements to SPHS                                                                                                              | 5. Sustaining or scaling change for SPHS                    | 6. Other |
|                             |      |                            |        |                                                                                                                                            |                   | leadership with focus, vision and engagement; skilled workforce and capacity building; data access and sharing/collaborating with consent | data use and research                                                                                                                |                                                             |          |
| Park YL, Canaway R. 2019.   | 2019 | WHO Western Pacific Region | ED     | "Healthcare system sustainability and resilience relate to preparedness and capacity to cope in the face of disease outbreak or disaster." |                   |                                                                                                                                           | Move towards universal healthcare which will enable "quality; efficiency; equity; accountability; and sustainability and resilience" | Well-established care<br><br>Utilising traditional medicine |          |



| <i>Article demographics</i>                    |      |                   |       | <i>Reason for article inclusion and summary of results</i> |                   |                                                                                                                                                                                                                                                                                                                                         |                                                                                                                                                                                                                                                                                                                                                          |                                          |          |
|------------------------------------------------|------|-------------------|-------|------------------------------------------------------------|-------------------|-----------------------------------------------------------------------------------------------------------------------------------------------------------------------------------------------------------------------------------------------------------------------------------------------------------------------------------------|----------------------------------------------------------------------------------------------------------------------------------------------------------------------------------------------------------------------------------------------------------------------------------------------------------------------------------------------------------|------------------------------------------|----------|
| Reference                                      | Year | Country           | Type* | 1. Definition of SPHS                                      | 2. Measuring SPHS | 3. Challenges to SPHS                                                                                                                                                                                                                                                                                                                   | 4. Improvements to SPHS                                                                                                                                                                                                                                                                                                                                  | 5. Sustaining or scaling change for SPHS | 6. Other |
| Quaglio G, Figueras J, Mantoan D, et al. 2018. | 2018 | Italy/<br>Belgium | ED    |                                                            |                   | Y "Over the last 2 decades, health systems in the European Union (EU) are being questioned over their effectiveness and sustainability. In pursuing both goals, they have to conciliate coexisting, not always aligned, realities. For example, (i) an epidemiological transition where chronic conditions and complex patients require | Y - "(i) community participation is a key principle of health promotion practices, stemming from an ideological position that shifts from a bio-medical paradigm towards a social model that creates conditions where people are active participants in their own healthcare;16 (ii) strengthening primary care is one of the major challenges facing EU |                                          |          |

| <i>Article demographics</i> |      |         |       | <i>Reason for article inclusion and summary of results</i> |                   |                                                                                                                                                                                                                                                                                                                                                           |                                                                                                                                                                                                                                                                                                                                                                                                 |                                          |          |
|-----------------------------|------|---------|-------|------------------------------------------------------------|-------------------|-----------------------------------------------------------------------------------------------------------------------------------------------------------------------------------------------------------------------------------------------------------------------------------------------------------------------------------------------------------|-------------------------------------------------------------------------------------------------------------------------------------------------------------------------------------------------------------------------------------------------------------------------------------------------------------------------------------------------------------------------------------------------|------------------------------------------|----------|
| Reference                   | Year | Country | Type* | 1. Definition of SPHS                                      | 2. Measuring SPHS | 3. Challenges to SPHS                                                                                                                                                                                                                                                                                                                                     | 4. Improvements to SPHS                                                                                                                                                                                                                                                                                                                                                                         | 5. Sustaining or scaling change for SPHS | 6. Other |
|                             |      |         |       |                                                            |                   | integrated services pivoting around primary care, that contrasts with the prevalence of specialized, rather fragmented care, mainly provided by hospitals;1,2 (ii) a pervasive idea that more care is always better than less care, when there is a widespread evidence of inappropriate use of treatments and technologies;3 (iii) the rising promise of | healthcare systems as they reduce fragmentation in care provision. Decision makers are searching for models that are able to increase the whole pathway of care: primary, secondary and tertiary, long-term care and eventually social care;17 (iii) threats to good governance—lack of appropriate competences, the existence of conflicts of interest, bureaucratic rigidity—translate into a |                                          |          |

| <i>Article demographics</i> |      |         |        | <i>Reason for article inclusion and summary of results</i> |                   |                                                                                                                                                                                                                                                                                                                                      |                                                                                                                                                                                                                                                                                                                                                                                    |                                          |          |
|-----------------------------|------|---------|--------|------------------------------------------------------------|-------------------|--------------------------------------------------------------------------------------------------------------------------------------------------------------------------------------------------------------------------------------------------------------------------------------------------------------------------------------|------------------------------------------------------------------------------------------------------------------------------------------------------------------------------------------------------------------------------------------------------------------------------------------------------------------------------------------------------------------------------------|------------------------------------------|----------|
| Reference                   | Year | Country | Type * | 1. Definition of SPHS                                      | 2. Measuring SPHS | 3. Challenges to SPHS                                                                                                                                                                                                                                                                                                                | 4. Improvements to SPHS                                                                                                                                                                                                                                                                                                                                                            | 5. Sustaining or scaling change for SPHS | 6. Other |
|                             |      |         |        |                                                            |                   | personalized medicine, that eclipses the efforts in promoting healthy lifestyles;4 or (iv) the increasing demand of information and transparency with respect to services' quality and safety, that contrasts with serious flaws in the good governance of health services.5 Underlying these challenges is a profound transition in | lack of transparency, poorly thought-out policies and the prevailing use of the 'low-hanging fruit' strategy;18 and (iv) finally, the generation and reuse of health data (administrative, clinical, environmental, etc.) are essential in embracing the change in the knowledge paradigm towards learning health systems and subsequently toward more sustainable health systems" |                                          |          |

| <i>Article demographics</i>                          |      |         |        | <i>Reason for article inclusion and summary of results</i> |                   |                                                                                                                                             |                                                                                                |                                                                                                                             |          |
|------------------------------------------------------|------|---------|--------|------------------------------------------------------------|-------------------|---------------------------------------------------------------------------------------------------------------------------------------------|------------------------------------------------------------------------------------------------|-----------------------------------------------------------------------------------------------------------------------------|----------|
| Reference                                            | Year | Country | Type * | 1. Definition of SPHS                                      | 2. Measuring SPHS | 3. Challenges to SPHS                                                                                                                       | 4. Improvements to SPHS                                                                        | 5. Sustaining or scaling change for SPHS                                                                                    | 6. Other |
|                                                      |      |         |        |                                                            |                   | the medical knowledge paradigm, from the traditional and prevailing heuristic approach to the development of data-driven learning systems." |                                                                                                |                                                                                                                             |          |
| Kilbourne AM, Braganza MZ, Bowersox NW, et al. 2019. | 2019 | USA     | EM     |                                                            |                   | Funding, lack of incentives for researchers to apply their research into practice                                                           |                                                                                                | Discusses how the learning health system may contribute to incremental change and enhancement of health system performance. |          |
| Lehoux P, Roncarolo F, Silva HP, Boivin A, Denis JL, | 2019 | Global  | RA     |                                                            |                   | "Since the late 1980s, new health technologies not only                                                                                     | Successful health systems are characterized by healthy people, superior care and fairness. The |                                                                                                                             |          |

| <i>Article demographics</i>                                 |      |         |        | <i>Reason for article inclusion and summary of results</i>                                     |                   |                                                                                                                                  |                                                                                                                                                                                                                                                                          |                                          |          |
|-------------------------------------------------------------|------|---------|--------|------------------------------------------------------------------------------------------------|-------------------|----------------------------------------------------------------------------------------------------------------------------------|--------------------------------------------------------------------------------------------------------------------------------------------------------------------------------------------------------------------------------------------------------------------------|------------------------------------------|----------|
| Reference                                                   | Year | Country | Type * | 1. Definition of SPHS                                                                          | 2. Measuring SPHS | 3. Challenges to SPHS                                                                                                            | 4. Improvements to SPHS                                                                                                                                                                                                                                                  | 5. Sustaining or scaling change for SPHS | 6. Other |
| Hebert R. 2019.                                             |      |         |        |                                                                                                |                   | increased global inequalities, but they also undermined the sustainability of health systems in rich and poor countries alike. " | researchers write that "over the next decades it will be imperative to implement policy mechanisms that can support the development, financing and use of innovations that do not compromise but rather contribute to the success and sustainability of health systems." |                                          |          |
| Editorial. Healthcare quarterly (Toronto, Ont.). 2020;22(4) | 2020 | Canada  | ED     | Health systems need the right distribution of educated health professionals who have the right | Yes               | Yes                                                                                                                              | Yes                                                                                                                                                                                                                                                                      | Yes                                      |          |

| <i>Article demographics</i> |      |         |        | <i>Reason for article inclusion and summary of results</i>                                                                                                                                                                                                                              |                   |                       |                         |                                          |          |
|-----------------------------|------|---------|--------|-----------------------------------------------------------------------------------------------------------------------------------------------------------------------------------------------------------------------------------------------------------------------------------------|-------------------|-----------------------|-------------------------|------------------------------------------|----------|
| Reference                   | Year | Country | Type * | 1. Definition of SPHS                                                                                                                                                                                                                                                                   | 2. Measuring SPHS | 3. Challenges to SPHS | 4. Improvements to SPHS | 5. Sustaining or scaling change for SPHS | 6. Other |
|                             |      |         |        | training and mindset; the skills and support to build effective teams and visionary leaders who co-create compassionate cultures and inclusive partnerships that foster integrated patient-centred care; and the right resources, processes, and tools to deliver solutions for current |                   |                       |                         |                                          |          |

| <i>Article demographics</i>                                                                                                                                                                              |      |         |        | <i>Reason for article inclusion and summary of results</i> |                                                                                                               |                                                                                                                                                                                                                                                             |                         |                                          |          |
|----------------------------------------------------------------------------------------------------------------------------------------------------------------------------------------------------------|------|---------|--------|------------------------------------------------------------|---------------------------------------------------------------------------------------------------------------|-------------------------------------------------------------------------------------------------------------------------------------------------------------------------------------------------------------------------------------------------------------|-------------------------|------------------------------------------|----------|
| Reference                                                                                                                                                                                                | Year | Country | Type * | 1. Definition of SPHS                                      | 2. Measuring SPHS                                                                                             | 3. Challenges to SPHS                                                                                                                                                                                                                                       | 4. Improvements to SPHS | 5. Sustaining or scaling change for SPHS | 6. Other |
|                                                                                                                                                                                                          |      |         |        | and future demands.                                        |                                                                                                               |                                                                                                                                                                                                                                                             |                         |                                          |          |
| Measuring universal health coverage based on an index of effective coverage of health services in 204 countries and territories, 1990-2019: a systematic analysis for the Global Burden of Disease Study | 2020 | Global  | EM     |                                                            | Measures of UHC; UHC viewed as way of achieving health system sustainability and sustainable health outcomes. | Talks about challenges in achieving UHC- especially for low-income countries - identifies per-capita spending to be able to reach 90% UHC as \$2538...Also identifies USA as outlier - achieves only 82% overall coverage despite spending ~8500 per capita |                         |                                          |          |

| <i>Article demographics</i>                                  |      |         |         | <i>Reason for article inclusion and summary of results</i>                                               |                                                                                                                                          |                                                                                                                                                                   |                         |                                          |          |
|--------------------------------------------------------------|------|---------|---------|----------------------------------------------------------------------------------------------------------|------------------------------------------------------------------------------------------------------------------------------------------|-------------------------------------------------------------------------------------------------------------------------------------------------------------------|-------------------------|------------------------------------------|----------|
| Reference                                                    | Year | Country | Type *  | 1. Definition of SPHS                                                                                    | 2. Measuring SPHS                                                                                                                        | 3. Challenges to SPHS                                                                                                                                             | 4. Improvements to SPHS | 5. Sustaining or scaling change for SPHS | 6. Other |
| 2019. Lancet (London,                                        |      |         |         |                                                                                                          |                                                                                                                                          |                                                                                                                                                                   |                         |                                          |          |
| Abimbola S, Baatiema L, Bigdeli M. 2019.                     | 2019 | Global  | RA      | Talks about resilient structures and Financing models                                                    |                                                                                                                                          | Talks about the challenges of decentralisation - i.e., Decentralised governance and financing to jurisdictions and the impacts of this model. Australian specific |                         |                                          |          |
| Barbazza E, Kringos D, Kruse I, Klazinga NS, Tello JE. 2019. | 2019 | Global  | EM & RA | Provides a definition of a sustainable primary care system that is linked with the broader health system | Provides a framework “The resulting framework applies a performance continuum in the classical approach of structures-processes-outcomes | Lack of standardised data collection; poor linkage of primary care with broader system                                                                            |                         |                                          |          |



| <i>Article demographics</i> |      |          |        | <i>Reason for article inclusion and summary of results</i> |                                                                                                                                                                                                                                       |                                  |                         |                                          |          |
|-----------------------------|------|----------|--------|------------------------------------------------------------|---------------------------------------------------------------------------------------------------------------------------------------------------------------------------------------------------------------------------------------|----------------------------------|-------------------------|------------------------------------------|----------|
| Reference                   | Year | Country  | Type * | 1. Definition of SPHS                                      | 2. Measuring SPHS                                                                                                                                                                                                                     | 3. Challenges to SPHS            | 4. Improvements to SPHS | 5. Sustaining or scaling change for SPHS | 6. Other |
|                             |      |          |        |                                                            | spanning 6 domains – primary care structures, model of primary care, care contact, primary care outputs, health system outcomes, and health outcomes – that are further classified by 26 subdomains and 63 features of primary care." |                                  |                         |                                          |          |
| Craig N, Robinson M. 2019.  | 2019 | Scotland | ED     | Yes                                                        |                                                                                                                                                                                                                                       | Yes                              |                         | Yes                                      |          |
| Costa-Font J,               | 2020 | Global   | ED     | This perspective paper                                     | Mainly in terms of                                                                                                                                                                                                                    | Focuses on ageing and increasing | Prevention              | Yes                                      |          |

| <i>Article demographics</i> |             |                |               | <i>Reason for article inclusion and summary of results</i>                                                                                                                                                                                                |                          |                                                                                                                  |                                |                                                 |                 |
|-----------------------------|-------------|----------------|---------------|-----------------------------------------------------------------------------------------------------------------------------------------------------------------------------------------------------------------------------------------------------------|--------------------------|------------------------------------------------------------------------------------------------------------------|--------------------------------|-------------------------------------------------|-----------------|
| <b>Reference</b>            | <b>Year</b> | <b>Country</b> | <b>Type *</b> | <b>1. Definition of SPHS</b>                                                                                                                                                                                                                              | <b>2. Measuring SPHS</b> | <b>3. Challenges to SPHS</b>                                                                                     | <b>4. Improvements to SPHS</b> | <b>5. Sustaining or scaling change for SPHS</b> | <b>6. Other</b> |
| Levaggi R. 2020.            |             |                |               | argues that a sustainable health system design encompasses identifying opportunities and incentives for innovation, alongside an analysis of its effect on expenditure. Although aging alone is not a powerful cost driver, the combined effect of costly | economic outcomes        | demands for new medical technologies including new treatments but talks about the potential impact of prevention |                                |                                                 |                 |

| <i>Article demographics</i> |      |         |        | <i>Reason for article inclusion and summary of results</i>                                                                                                                                                                                                         |                   |                       |                         |                                          |          |
|-----------------------------|------|---------|--------|--------------------------------------------------------------------------------------------------------------------------------------------------------------------------------------------------------------------------------------------------------------------|-------------------|-----------------------|-------------------------|------------------------------------------|----------|
| Reference                   | Year | Country | Type * | 1. Definition of SPHS                                                                                                                                                                                                                                              | 2. Measuring SPHS | 3. Challenges to SPHS | 4. Improvements to SPHS | 5. Sustaining or scaling change for SPHS | 6. Other |
|                             |      |         |        | innovation, personalized care, and the rise of chronic conditions is. We identify an increasing role of prevention, the reduction of the prevalence of chronic conditions, re-organisation of incentives in healthcare markets, including a closer scrutiny of the |                   |                       |                         |                                          |          |

| <i>Article demographics</i>                                                              |      |         |        | <i>Reason for article inclusion and summary of results</i> |                                                                                                                                                              |                                                                                                                                                                                                                                                                                                                        |                                                                                                                                                                                            |                                                                                                                                                                                                                                                                                                                                        |          |
|------------------------------------------------------------------------------------------|------|---------|--------|------------------------------------------------------------|--------------------------------------------------------------------------------------------------------------------------------------------------------------|------------------------------------------------------------------------------------------------------------------------------------------------------------------------------------------------------------------------------------------------------------------------------------------------------------------------|--------------------------------------------------------------------------------------------------------------------------------------------------------------------------------------------|----------------------------------------------------------------------------------------------------------------------------------------------------------------------------------------------------------------------------------------------------------------------------------------------------------------------------------------|----------|
| Reference                                                                                | Year | Country | Type * | 1. Definition of SPHS                                      | 2. Measuring SPHS                                                                                                                                            | 3. Challenges to SPHS                                                                                                                                                                                                                                                                                                  | 4. Improvements to SPHS                                                                                                                                                                    | 5. Sustaining or scaling change for SPHS                                                                                                                                                                                                                                                                                               | 6. Other |
|                                                                                          |      |         |        | appropriate<br>ness of new<br>treatments                   |                                                                                                                                                              |                                                                                                                                                                                                                                                                                                                        |                                                                                                                                                                                            |                                                                                                                                                                                                                                                                                                                                        |          |
| Derakhshani N, Doshman gir L, Ahmadi A, Fakhri A, Sadeghi-Bazargani H, Gordeev VS. 2020. | 2020 | Global  | RA     | UHC is implied to be a sustainable health system           | Focussed on UHC as a goal for sustainability ; uses a framework and several dimensions... Talks about determinants, barriers and enablers of sustainable UHC | Service delivery (dimension 5) is another dimension of the suggested tool with four axes: basic benefits package, geographical access, quality of care, and human resources for health. In regards to the benefits package axes, developing an affordable, sustainable, and equitable basic package of healthcare that | Yes - talks about culture, integration, seamless care. Diffusion of Excellence practices in making a difference every day for veterans, this article highlights 4 different practice areas | Yes - Social infrastructure and social sustainability (dimensions 1–2) seem to be influential factors in progress towards UHC: society literacy, community income, poverty, age group, and population. <sup>54</sup> To reach social sustainability and providing social infrastructure, as well as providing sustainable development, |          |

| <i>Article demographics</i> |      |         |       | <i>Reason for article inclusion and summary of results</i> |                                                            |                                                    |                                                                                                      |                                                                                                                                                                                                                                                                        |          |
|-----------------------------|------|---------|-------|------------------------------------------------------------|------------------------------------------------------------|----------------------------------------------------|------------------------------------------------------------------------------------------------------|------------------------------------------------------------------------------------------------------------------------------------------------------------------------------------------------------------------------------------------------------------------------|----------|
| Reference                   | Year | Country | Type* | 1. Definition of SPHS                                      | 2. Measuring SPHS                                          | 3. Challenges to SPHS                              | 4. Improvements to SPHS                                                                              | 5. Sustaining or scaling change for SPHS                                                                                                                                                                                                                               | 6. Other |
|                             |      |         |       |                                                            |                                                            | can serve various population needs is a challenge. |                                                                                                      | political will and determination, technical skills, expertise, and administrative cooperation are required. Political commitment can be a pivotal issue in progress to achieve UHC. Socio-political and economic sustainability essential to support a sustainable UHC |          |
| Clancy C. 2019.             | 2019 | USA     | ED    | Not as such... indirect                                    | talks about data to support innovation and measure success |                                                    | Yes - talks about culture, integration, seamless care. Diffusion of Excellence practices in making a | large national network providing care to 9 million veterans; Importance of systems and data. The next                                                                                                                                                                  |          |

| <i>Article demographics</i>          |      |         |        | <i>Reason for article inclusion and summary of results</i>   |                   |                       |                                                                                                                                                                                                                                   |                                                                                                                                                                                                                                                                                                                                       |          |
|--------------------------------------|------|---------|--------|--------------------------------------------------------------|-------------------|-----------------------|-----------------------------------------------------------------------------------------------------------------------------------------------------------------------------------------------------------------------------------|---------------------------------------------------------------------------------------------------------------------------------------------------------------------------------------------------------------------------------------------------------------------------------------------------------------------------------------|----------|
| Reference                            | Year | Country | Type * | 1. Definition of SPHS                                        | 2. Measuring SPHS | 3. Challenges to SPHS | 4. Improvements to SPHS                                                                                                                                                                                                           | 5. Sustaining or scaling change for SPHS                                                                                                                                                                                                                                                                                              | 6. Other |
|                                      |      |         |        |                                                              |                   |                       | difference every day for veterans, this article highlights 4 different practice areas: 1) direct scheduling, 2) access to healthcare in rural areas, 3) access to mental healthcare, and 4) interactive and patient-centred care. | challenge, however, is elevating such lessons learned to transition the initiative from a nascent start-up to a sustainable part of VHA's culture. There are 3 primary components of the current transition plan: 1) cultivate the culture, 2) build partnerships and encourage collaboration, and 3) embrace appropriate technology. |          |
| Marcotte LM, Moriates C, Wolfson DB, | 2020 | USA     | ED     | indirectly describes sustainability through high value care, |                   |                       | Yes - supporting professionalism is seen a more durable intervention rather than                                                                                                                                                  | "Medical professionalism is a strong, durable, intrinsic motivator for                                                                                                                                                                                                                                                                |          |

| <i>Article demographics</i> |      |         |        | <i>Reason for article inclusion and summary of results</i>                                                                                                                                                                                                                                 |                   |                       |                                                                                                     |                                                                                                                                |          |
|-----------------------------|------|---------|--------|--------------------------------------------------------------------------------------------------------------------------------------------------------------------------------------------------------------------------------------------------------------------------------------------|-------------------|-----------------------|-----------------------------------------------------------------------------------------------------|--------------------------------------------------------------------------------------------------------------------------------|----------|
| Reference                   | Year | Country | Type * | 1. Definition of SPHS                                                                                                                                                                                                                                                                      | 2. Measuring SPHS | 3. Challenges to SPHS | 4. Improvements to SPHS                                                                             | 5. Sustaining or scaling change for SPHS                                                                                       | 6. Other |
| Frankel RM. 2020.           |      |         |        | professionalism and education and appropriate incentives and remuneration; It talks about re-conceptualising high value in terms of "infusing" this concept as a principle for practice among all doctors in training... Providing high-value care as a competency for doctors in training |                   |                       | dealing with incentives for single aspects of practice. Linking professionalism with payment reform | improving value in healthcare delivery and should be employed to support training efforts, systems change and payment reform". |          |

| <i>Article demographics</i>                     |      |         |        | <i>Reason for article inclusion and summary of results</i>                                                                                                                                                                                                                                               |                   |                       |                         |                                          |          |
|-------------------------------------------------|------|---------|--------|----------------------------------------------------------------------------------------------------------------------------------------------------------------------------------------------------------------------------------------------------------------------------------------------------------|-------------------|-----------------------|-------------------------|------------------------------------------|----------|
| Reference                                       | Year | Country | Type * | 1. Definition of SPHS                                                                                                                                                                                                                                                                                    | 2. Measuring SPHS | 3. Challenges to SPHS | 4. Improvements to SPHS | 5. Sustaining or scaling change for SPHS | 6. Other |
| Witter S, Palmer N, Balabano va D, et al. 2019. | 2019 | Global  | RA     | The term “HSS” first came from a recognition of the need to address the distorting effects of increasing expenditure on vertical programmes targeted to address specific diseases and interventions (e.g., HIV/AIDS, polio) in the absence of support to broader systems, while recognising that without |                   |                       |                         |                                          |          |



| <i>Article demographics</i>   |      |           |        | <i>Reason for article inclusion and summary of results</i>                                           |                                                   |                       |                                                                                                                                                                                           |                                          |          |
|-------------------------------|------|-----------|--------|------------------------------------------------------------------------------------------------------|---------------------------------------------------|-----------------------|-------------------------------------------------------------------------------------------------------------------------------------------------------------------------------------------|------------------------------------------|----------|
| Reference                     | Year | Country   | Type * | 1. Definition of SPHS                                                                                | 2. Measuring SPHS                                 | 3. Challenges to SPHS | 4. Improvements to SPHS                                                                                                                                                                   | 5. Sustaining or scaling change for SPHS | 6. Other |
|                               |      |           |        | strengthening of basic health systems, vertical programmes would be unlikely to deliver as expected. |                                                   |                       |                                                                                                                                                                                           |                                          |          |
| Sturmberg JP. 2018            | 2018 |           | ED     |                                                                                                      |                                                   |                       | Could work to improve the resilience of patients with multi-morbidities. This has been shown to help prevent overutilization on the health system, as well as improve the QOL of patients |                                          |          |
| Thistlethwaite JE, Dunston R, | 2019 | Australia | ED     |                                                                                                      | Recognise that interprofessional health education |                       | The importance and shift of interprofessional education from an organisational                                                                                                            |                                          |          |

| <i>Article demographics</i>              |             |                |               | <i>Reason for article inclusion and summary of results</i> |                                                                                                                                                   |                                                                                                                                                                                             |                                                       |                                                 |                 |
|------------------------------------------|-------------|----------------|---------------|------------------------------------------------------------|---------------------------------------------------------------------------------------------------------------------------------------------------|---------------------------------------------------------------------------------------------------------------------------------------------------------------------------------------------|-------------------------------------------------------|-------------------------------------------------|-----------------|
| <b>Reference</b>                         | <b>Year</b> | <b>Country</b> | <b>Type *</b> | <b>1. Definition of SPHS</b>                               | <b>2. Measuring SPHS</b>                                                                                                                          | <b>3. Challenges to SPHS</b>                                                                                                                                                                | <b>4. Improvements to SPHS</b>                        | <b>5. Sustaining or scaling change for SPHS</b> | <b>6. Other</b> |
| Yassine T. 2019.                         |             |                |               |                                                            | needs to be funded constantly (even if funding is relatively small) and that it needs to be able to be adapted to micro, meso and macro processes |                                                                                                                                                                                             | to a national level, and the role of national funding |                                                 |                 |
| Iskrov G, Stefanov R, Ferrelli RM. 2019. | 2019        | European Union | ED            |                                                            | Recognition that fiscal sustainability is important, and that achieving this means that more prevalent diseases get more funding                  | The challenge of making primary care accessible, affordable, and reducing unnecessary hospital admissions. Integrating the health workforce to the benefit of the patient. Anticipating for |                                                       |                                                 |                 |

| <i>Article demographics</i> |             |                |               | <i>Reason for article inclusion and summary of results</i> |                          |                                                                                                                                                 |                                |                                                 |                 |
|-----------------------------|-------------|----------------|---------------|------------------------------------------------------------|--------------------------|-------------------------------------------------------------------------------------------------------------------------------------------------|--------------------------------|-------------------------------------------------|-----------------|
| <b>Reference</b>            | <b>Year</b> | <b>Country</b> | <b>Type *</b> | <b>1. Definition of SPHS</b>                               | <b>2. Measuring SPHS</b> | <b>3. Challenges to SPHS</b>                                                                                                                    | <b>4. Improvements to SPHS</b> | <b>5. Sustaining or scaling change for SPHS</b> | <b>6. Other</b> |
|                             |             |                |               |                                                            |                          | changes in need and changing the health workforce accordingly. And that constant data collection and analysis could improve policy and practice |                                |                                                 |                 |

\*Note.

ED – editorial, opinion piece; RA – review article, EM – empirical article.
