# Supplementary material for: How can the healthcare system deliver sustainable performance? A scoping review
Source: HighWire-hosted journal article supplement (doi:10.1136/bmjopen-2021-059207), 2022-05-01
Supplement: bmjopen-2021-059207supp003_data_supplement.pdf [file bmjopen-2021-059207supp003_data_supplement.pdf]

**HOW CAN THE HEALTHCARE SYSTEM DELIVER SUSTAINABLE PERFORMANCE?  
A SCOPING REVIEW**

**ADDITIONAL FILE 3: QUALITY ASSESSMENT**

**Hawker rating for included empirical articles**

| Reference                                                                                                         | Abstract and title | Introduction and aims | Method and data | Sampling | Data analysis | Ethics and bias | Finding and results | Transferability and generalisability | Implications and usefulness | Total (out of 36) |
|-------------------------------------------------------------------------------------------------------------------|--------------------|-----------------------|-----------------|----------|---------------|-----------------|---------------------|--------------------------------------|-----------------------------|-------------------|
| Ament SMC, Gillissen F, Moser A, Maessen JMC, Dirksen CD, von Meyenfeldt MF, et al. 2014                          | 4                  | 4                     | 4               | 3        | 4             | 4               | 4                   | 3                                    | 3                           | 33                |
| Bramesfeld, A., F. Amaddeo, J. Caldas-de-Almeida, G. Cardoso, A. Depaigne-Loth, R. Derenne, V. Donisi et al. 2016 | 4                  | 4                     | 3               | 3        | 4             | 1               | 4                   | 3                                    | 4                           | 30                |

| Reference                                                        | Abstract and title | Introduction and aims | Method and data | Sampling | Data analysis | Ethics and bias | Finding and results | Transferability and generalisability | Implications and usefulness | Total (out of 36) |
|------------------------------------------------------------------|--------------------|-----------------------|-----------------|----------|---------------|-----------------|---------------------|--------------------------------------|-----------------------------|-------------------|
| Buttigieg SC, Schuetz M, Bezzina F. 2016                         | 3                  | 3                     | 4               | 3        | 3             | 4               | 4                   | 3                                    | 4                           | 31                |
| Buykx P, Humphreys JS, Tham R, et al. 2012                       | 4                  | 4                     | 2               | 1        | 1             | 3               | 4                   | 2                                    | 4                           | 25                |
| Cho CC, Ramanan RA, Feldman MD. 2011                             | 4                  | 3                     | 4               | 4        | 4             | 1               | 4                   | 3                                    | 4                           | 31                |
| De Rosis S, Nuti S. 2018                                         | 3                  | 4                     | 4               | 3        | 4             | 1               | 4                   | 3                                    | 3                           | 29                |
| Dunn, P. M., B. B. Arnetz, J. F. Christensen, and L. Homer. 2007 | 3                  | 4                     | 4               | 4        | 4             | 1               | 4                   | 3                                    | 3                           | 30                |
| Ehrlich C, Kendall E. 2015                                       | 4                  | 3                     | 4               | 3        | 3             | 3               | 4                   | 3                                    | 3                           | 30                |
| Farmanova E, Kirvan C, Verma J, et al. 2016                      | 4                  | 3                     | 3               | 2        | 3             | 1               | 4                   | 2                                    | 4                           | 26                |
| Foo, C. Y., K. K. Lim, S. Sivasampu, K.                          | 4                  | 4                     | 3               | 2        | 4             | 2               | 4                   | 3                                    | 3                           | 29                |

| Reference                                                                                                                                                                                                                  | Abstract and title | Introduction and aims | Method and data | Sampling | Data analysis | Ethics and bias | Finding and results | Transferability and generalisability | Implications and usefulness | Total (out of 36) |
|----------------------------------------------------------------------------------------------------------------------------------------------------------------------------------------------------------------------------|--------------------|-----------------------|-----------------|----------|---------------|-----------------|---------------------|--------------------------------------|-----------------------------|-------------------|
| B. Dahian, and P. P. Goh. 2015                                                                                                                                                                                             |                    |                       |                 |          |               |                 |                     |                                      |                             |                   |
| Fox, L. A., K. E. Walsh, and E. G. Schainker. 2016                                                                                                                                                                         | 4                  | 4                     | 4               | 1        | 4             | 1               | 4                   | 2                                    | 3                           | 27                |
| Garde S, Hullin CM, Chen R, et al. 2007;129(Pt 2):1179-1183.                                                                                                                                                               | 3                  | 4                     | 3               | 4        | 4             | 1               | 3                   | 2                                    | 3                           | 27                |
| Global, regional, and national disability-adjusted life-years (DALYs) for 315 diseases and injuries and healthy life expectancy (HALE), 1990-2015: a systematic analysis for the Global Burden of Disease Study 2015. 2016 | 4                  | 4                     | 4               | 3        | 4             | 3               | 4                   | 4                                    | 4                           | 34                |

| Reference                                                                                                        | Abstract and title | Introduction and aims | Method and data | Sampling | Data analysis | Ethics and bias | Finding and results | Transferability and generalisability | Implications and usefulness | Total (out of 36) |
|------------------------------------------------------------------------------------------------------------------|--------------------|-----------------------|-----------------|----------|---------------|-----------------|---------------------|--------------------------------------|-----------------------------|-------------------|
| Heron, N. 2015.                                                                                                  | 3                  | 3                     | 4               | 4        | 4             | 1               | 4                   | 4                                    | 2                           | 29                |
| Hibbert PD, Thomas MJW, Deakin A, et al. 2018                                                                    | 4                  | 4                     | 3               | 3        | 4             | 3               | 4                   | 3                                    | 4                           | 32                |
| Kerr R, Hendrie DV. 2018                                                                                         | 4                  | 4                     | 4               | 3        | 4             | 3               | 4                   | 3                                    | 4                           | 33                |
| Levine, S., S. O'Mahony, A. Baron, A. Ansari, C. Deamant, J. Frader, I. Leyva, M. Marschke, and M. Preodor. 2017 | 4                  | 3                     | 4               | 3        | 4             | 1               | 4                   | 3                                    | 4                           | 30                |
| Lizarondo, L., C. Turnbull, T. Kroon, K. Grimmer, A. Bell, S. Kumar, M. McEvoy et al. 2016                       | 4                  | 4                     | 4               | 3        | 4             | 3               | 3                   | 3                                    | 4                           | 32                |
| McVeigh J, MacLachlan M, Gilmore B, et                                                                           | 4                  | 3                     | 3               | 3        | 4             | 4               | 4                   | 3                                    | 3                           | 31                |

| Reference                                                                                                                   | Abstract and title | Introduction and aims | Method and data | Sampling | Data analysis | Ethics and bias | Finding and results | Transferability and generalisability | Implications and usefulness | Total (out of 36) |
|-----------------------------------------------------------------------------------------------------------------------------|--------------------|-----------------------|-----------------|----------|---------------|-----------------|---------------------|--------------------------------------|-----------------------------|-------------------|
| al. 2016;12(1):49.                                                                                                          |                    |                       |                 |          |               |                 |                     |                                      |                             |                   |
| McGrath, S. P., and G. T. Blike. 2015                                                                                       | 4                  | 4                     | 4               | 3        | 3             | 1               | 4                   | 1                                    | 2                           | 26                |
| Molfenter, T., D. Gustafson, C. Kilo, A. Bhattacharya, and J. Olsson. 2005                                                  | 2                  | 2                     | 4               | 2        | 4             | 3               | 3                   | 3                                    | 4                           | 27                |
| Rees, G. H. 2014                                                                                                            | 3                  | 4                     | 3               | 3        | 4             | 1               | 4                   | 3                                    | 4                           | 29                |
| Robertson J, Walkom EJ, Henry DA. 2011                                                                                      | 4                  | 4                     | 4               | 3        | 4             | 4               | 4                   | 3                                    | 3                           | 33                |
| Scheirer MA. Is sustainability possible? A review and commentary on empirical studies of program sustainability. Am J Eval. | 3                  | 2                     | 3               | 3        | 4             | 4               | 2                   | 2                                    | 4                           | 27                |

| Reference                                                                                           | Abstract and title | Introduction and aims | Method and data | Sampling | Data analysis | Ethics and bias | Finding and results | Transferability and generalisability | Implications and usefulness | Total (out of 36) |
|-----------------------------------------------------------------------------------------------------|--------------------|-----------------------|-----------------|----------|---------------|-----------------|---------------------|--------------------------------------|-----------------------------|-------------------|
| 2005;26(3):320–47.                                                                                  |                    |                       |                 |          |               |                 |                     |                                      |                             |                   |
| Schwann, N. M., K. A. Bretz, S. Eid, T. Burger, D. Fry, F. Ackler, P. Evans et al. 2011             | 4                  | 2                     | 4               | 2        | 4             | 3               | 3                   | 2                                    | 3                           | 27                |
| Shaw J, Wong I, Griffin B, Robertson M, Bhatia RS. 2017                                             | 3                  | 4                     | 4               | 2        | 4             | 1               | 4                   | 3                                    | 3                           | 28                |
| Solon, O., K. Woo, S. A. Quimbo, R. Shimkhada, J. Florentino, and J. W. Peabody. 2009               | 4                  | 4                     | 4               | 3        | 4             | 3               | 4                   | 3                                    | 4                           | 33                |
| Stockdale, S. E., J. Zuchowski, L. V. Rubenstein, N. Sapir, E. M. Yano, L. Altman, J. J. Fickel, S. | 4                  | 4                     | 4               | 3        | 4             | 1               | 4                   | 3                                    | 4                           | 31                |

| Reference                                                                | Abstract and title | Introduction and aims | Method and data | Sampling | Data analysis | Ethics and bias | Finding and results | Transferability and generalisability | Implications and usefulness | Total (out of 36) |
|--------------------------------------------------------------------------|--------------------|-----------------------|-----------------|----------|---------------|-----------------|---------------------|--------------------------------------|-----------------------------|-------------------|
| McDougall, T. Dresselhaus, and A. B. Hamilton. 2016                      |                    |                       |                 |          |               |                 |                     |                                      |                             |                   |
| Wutzke, S., M. Benton, and R. Verma. 2016                                | 4                  | 4                     | 4               | 3        | 4             | 4               | 4                   | 3                                    | 3                           | 33                |
| Zhao Y, Russell DJ, Guthridge S, et al. 2017                             | 4                  | 4                     | 4               | 3        | 4             | 3               | 4                   | 3                                    | 4                           | 33                |
| Lo Sardo DR, Thurner S, Sorger J, Duftschmid G, Endel G, Klimek P. 2019. | 3                  | 3                     | 2               | 1        | 4             | 1               | 4                   | 3                                    | 3                           | 24                |
| Williams I, Allen K, Plahe G. 2019.                                      | 3                  | 4                     | 4               | 4        | 4             | 4               | 4                   | 4                                    | 4                           | 35                |
| Ammentorp J, Bigi S, Silverman J, et al. 2021.                           | 4                  | 4                     | 3               | 3        | 4             | 3               | 4                   | 4                                    | 4                           | 33                |
| Bentley C, Peacock S, Abelson J, et al. 2019.                            | 4                  | 4                     | 3               | 3        | 3             | 3               | 4                   | 4                                    | 4                           | 32                |

| Reference                                                                                      | Abstract and title | Introduction and aims | Method and data | Sampling | Data analysis | Ethics and bias | Finding and results | Transferability and generalisability | Implications and usefulness | Total (out of 36) |
|------------------------------------------------------------------------------------------------|--------------------|-----------------------|-----------------|----------|---------------|-----------------|---------------------|--------------------------------------|-----------------------------|-------------------|
| Shen H, Sui Y, Fu Y. 2020.                                                                     | 4                  | 4                     | 2               | 2        | 4             | 4               | 4                   | 4                                    | 4                           | 32                |
| Fridell M, Edwin S, von Schreeb J, Saulnier DD. 2020.                                          | 4                  | 4                     | 3               | 3        | 4             | 4               | 4                   | 4                                    | 4                           | 34                |
| Pereno A, Eriksson D. 2020.                                                                    | 3                  | 4                     | 3               | 3        | 4             | 3               | 4                   | 4                                    | 4                           | 32                |
| Bogaert P, van Oers H, Van Oyen H. 2018.                                                       | 4                  | 4                     | 4               | 3        | 3             | 3               | 4                   | 4                                    | 4                           | 33                |
| Enticott J, Braaf S, Johnson A, Jones A, Teede HJ. 2020.                                       | 4                  | 4                     | 4               | 3        | 4             | 4               | 4                   | 3                                    | 4                           | 34                |
| Kilbourne AM, Braganza MZ, Bowersox NW, et al. 2019.                                           | 4                  | 3                     | 3               | 3        | 4             | 2               | 3                   | 4                                    | 4                           | 30                |
| Measuring universal health coverage based on an index of effective coverage of health services | 4                  | 4                     | 4               | 4        | 4             | 3               | 4                   | 4                                    | 4                           | 35                |



| Reference                                                                                                                     | Abstract and title | Introduction and aims | Method and data | Sampling | Data analysis | Ethics and bias | Finding and results | Transferability and generalisability | Implications and usefulness | Total (out of 36) |
|-------------------------------------------------------------------------------------------------------------------------------|--------------------|-----------------------|-----------------|----------|---------------|-----------------|---------------------|--------------------------------------|-----------------------------|-------------------|
| in 204 countries and territories, 1990-2019: a systematic analysis for the Global Burden of Disease Study 2019. Lancet. 2020. |                    |                       |                 |          |               |                 |                     |                                      |                             |                   |
| Barbazza E, Kringos D, Kruse I, Klazinga NS, Tello JE. 2019.                                                                  | 4                  | 4                     | 4               | 4        | 4             | 3               | 4                   | 3                                    | 3                           | 33                |

*Note.*

Each category is rated on a 4-point scale (from 1="very poor" to 4="good") to create a total score of up to 36.

## AACODS rating for editorial and opinion articles

| Reference                                                                                                                                        | Authority  |                                                                                          | Accuracy   |                                                                                               | Coverage   |                                                                                                    | Objectivity |                                                                                                           | Date       |                                                                                       | Significance |                                                                                                                                          |
|--------------------------------------------------------------------------------------------------------------------------------------------------|------------|------------------------------------------------------------------------------------------|------------|-----------------------------------------------------------------------------------------------|------------|----------------------------------------------------------------------------------------------------|-------------|-----------------------------------------------------------------------------------------------------------|------------|---------------------------------------------------------------------------------------|--------------|------------------------------------------------------------------------------------------------------------------------------------------|
|                                                                                                                                                  | Yes or no? | Comment                                                                                  | Yes or no? | Comment                                                                                       | Yes or no? | Comment                                                                                            | Yes or no?  | Comment                                                                                                   | Yes or no? | Comment                                                                               | Yes or no?   | Comment                                                                                                                                  |
| Al Dhawi AA, West DJ, Jr., Spinelli RJ, Gompf TA. The challenge of sustaining health care in Oman. <i>Health Care Manager.</i> 2007;26(1):19-30. | Yes        | Authors have authority, relevant references included. Published in peer-reviewed journal | Yes        | Brief clear and met, peer reviewed                                                            | Yes        | Focus on Oman                                                                                      | Yes         | Author bias not explicitly stated, but standpoint is balanced                                             | Yes        | Context of article identifiable. Key contemporary references included                 | Yes          | Important article in recognising threats to the health system in Oman, and a model for sustaining healthcare reform in Oman is discussed |
| Amalberti, R., W. Nicklin, and J. Braithwaite. 2016. Preparing national health systems to cope with                                              | Yes        | Authors have authority, relevant references included. Published in peer-reviewed journal | Yes        | Aim not explicit, but article to report on an international workshop previously conducted. No | Yes        | Wide coverage, worldwide discussion encapsulating main issues associated with an ageing population | Yes         | Recognise this paper made in association with the International Society of Quality in Health Care (ISQua) | Yes        | Clear date acknowledged as from 1960-currently (2016 when article was published). Key | Yes          | Good summary of current worldwide problem, and nuance between cohorts of countries experienci                                            |

| Reference                                                                                                                                                                | Authority  |                                                                                          | Accuracy   |                                                                         | Coverage   |                                   | Objectivity |                                                                                                          | Date       |                                                                       | Significance |                                                                                                |
|--------------------------------------------------------------------------------------------------------------------------------------------------------------------------|------------|------------------------------------------------------------------------------------------|------------|-------------------------------------------------------------------------|------------|-----------------------------------|-------------|----------------------------------------------------------------------------------------------------------|------------|-----------------------------------------------------------------------|--------------|------------------------------------------------------------------------------------------------|
|                                                                                                                                                                          | Yes or no? | Comment                                                                                  | Yes or no? | Comment                                                                 | Yes or no? | Comment                           | Yes or no?  | Comment                                                                                                  | Yes or no? | Comment                                                               | Yes or no?   | Comment                                                                                        |
| the impending tsunami of ageing and its associated complexities: Towards more sustainable health care. Int J Qual Health Care 28 (3):412-414. doi:10.1093/intqhc/mzw021. |            |                                                                                          |            | method reported. Published in peer-reviewed journal                     |            |                                   |             | and participants from the countries involved. However, offers a balanced opinion of the issues discussed |            | references also included                                              |              | ng an ageing population to different extents                                                   |
| Armstrong BK, Gillespie JA, Leeder SR, Rubin GL, Russell LM. Challenges in health                                                                                        | Yes        | Authors have authority, relevant references included. Published in peer-reviewed journal | Yes        | Brief clearly stated in presenting the challenges to make a sustainable | Yes        | Focus on Australian health system | Yes         | Author bias not explicitly stated, but standpoint is balanced                                            | Yes        | Context of article identifiable. Key contemporary references included | Yes          | Unique and useful article outlining some main challenges of healthcare, tailored to the health |

| Reference                                                                                                                                             | Authority  |                                                                                          | Accuracy   |                                         | Coverage   |                                                                                                            | Objectivity |                                                               | Date       |                                                                       | Significance |                                                                                                                                   |
|-------------------------------------------------------------------------------------------------------------------------------------------------------|------------|------------------------------------------------------------------------------------------|------------|-----------------------------------------|------------|------------------------------------------------------------------------------------------------------------|-------------|---------------------------------------------------------------|------------|-----------------------------------------------------------------------|--------------|-----------------------------------------------------------------------------------------------------------------------------------|
|                                                                                                                                                       | Yes or no? | Comment                                                                                  | Yes or no? | Comment                                 | Yes or no? | Comment                                                                                                    | Yes or no?  | Comment                                                       | Yes or no? | Comment                                                               | Yes or no?   | Comment                                                                                                                           |
| and health care for Australia. <i>Medical Journal of Australia</i> . 2007;187(9):485-489.                                                             |            |                                                                                          |            | healthcare system                       |            |                                                                                                            |             |                                                               |            |                                                                       |              | system and context in question                                                                                                    |
| Atmore C. The role of medical generalism in the New Zealand health system into the future. <i>New Zealand Medical Journal</i> . 2015;128(1419):50-55. | Yes        | Authors have authority, relevant references included. Published in peer-reviewed journal | Yes        | Brief clear and met, no method provided | Yes        | New Zealand healthcare specific, but recognises that the solution could be applied to other health systems | Yes         | Author bias not explicitly stated, but standpoint is balanced | Yes        | Context of article identifiable. Key contemporary references included | Yes          | Emphasises the importance of being a generalist and how this could trailblaze this new role and system design for other countries |
| Barasa EW, Cloete K, Gilson L. From bouncing back, to                                                                                                 | Yes        | Authors have authority and are from various                                              | Yes        | Brief described and met. No methodolo   | Yes        | Worldwide coverage that aligns with the authors diverse                                                    | Yes         | Well balanced presentation incorporating                      | Yes        | Framed around the Ebola outbreak (2014-2016).                         | Yes          | Relevant worldwide to all health systems                                                                                          |

| Reference                                                                                                                                                   | Authority  |                                                                                                                   | Accuracy   |                                                        | Coverage   |                                   | Objectivity |                                                                                              | Date       |                                                                                                         | Significance |                                                                                                                        |
|-------------------------------------------------------------------------------------------------------------------------------------------------------------|------------|-------------------------------------------------------------------------------------------------------------------|------------|--------------------------------------------------------|------------|-----------------------------------|-------------|----------------------------------------------------------------------------------------------|------------|---------------------------------------------------------------------------------------------------------|--------------|------------------------------------------------------------------------------------------------------------------------|
|                                                                                                                                                             | Yes or no? | Comment                                                                                                           | Yes or no? | Comment                                                | Yes or no? | Comment                           | Yes or no?  | Comment                                                                                      | Yes or no? | Comment                                                                                                 | Yes or no?   | Comment                                                                                                                |
| nurturing emergence: reframing the concept of resilience in health systems strengthening. <i>Health policy and planning</i> . 2017;32(suppl_3):iii91-iii94. |            | continents around the globe, relevant references included. Published in peer-reviewed journal                     |            | gy provided                                            |            | backgrounds                       |             | worldwide need to nurture everyday resilience in healthcare, rather than just in emergencies |            | Contemporary references also used                                                                       |              |                                                                                                                        |
| Bessler JS, Ellies M. Values and value--a vision for the Australian health care system. <i>Australian Health Review</i> . 1995;18(3):6-17;                  | Partially  | Authors have authority in IT but not healthcare, relevant references included. Published in peer-reviewed journal | Yes        | Brief clear and met, no method provided, peer-reviewed | Yes        | Focus on Australian health system | Yes         | Author bias not explicitly stated, but standpoint is clear                                   | Yes        | Context of article identified as current (at time of publication). Key contemporary references included | Yes          | Investigates the need for health reform to address rising costs with the health system and increase its sustainability |

| Reference                                                                                                                                                                                                                             | Authority  |                                                                                                                                                                                      | Accuracy   |                                                                                                                                                                                                                   | Coverage   |                                                            | Objectivity |                                                                                                                | Date       |                                                                       | Significance |                                                |
|---------------------------------------------------------------------------------------------------------------------------------------------------------------------------------------------------------------------------------------|------------|--------------------------------------------------------------------------------------------------------------------------------------------------------------------------------------|------------|-------------------------------------------------------------------------------------------------------------------------------------------------------------------------------------------------------------------|------------|------------------------------------------------------------|-------------|----------------------------------------------------------------------------------------------------------------|------------|-----------------------------------------------------------------------|--------------|------------------------------------------------|
|                                                                                                                                                                                                                                       | Yes or no? | Comment                                                                                                                                                                              | Yes or no? | Comment                                                                                                                                                                                                           | Yes or no? | Comment                                                    | Yes or no?  | Comment                                                                                                        | Yes or no? | Comment                                                               | Yes or no?   | Comment                                        |
| discussion 18-29.                                                                                                                                                                                                                     |            |                                                                                                                                                                                      |            |                                                                                                                                                                                                                   |            |                                                            |             |                                                                                                                |            |                                                                       |              |                                                |
| Birch S, Murphy GT, MacKenzie A, Cumming J. In place of fear: aligning health care planning with system objectives to achieve financial sustainability. <i>Journal of Health Services &amp; Research Policy</i> . 2015;20(2):109-114. | Yes        | Authors have authority in a combination of fields (health economics, policy analysis, health services and nursing), relevant references included. Published in peer-reviewed journal | Yes        | Clear brief in outlining the current healthcare expenditure, and creating the healthcare sustainability framework to identify determinants of healthcare expenditure, so that it can evolve with population needs | Yes        | Worldwide, with examples from Australia, the UK and Canada | Yes         | Authors standpoint clear. Examples from numerous countries and from reviews in the field, seems well balanced. | Yes        | Context of article identifiable. Key contemporary references included | Yes          | Presents a healthcare sustainability framework |
| Buchan J. What difference                                                                                                                                                                                                             | Yes        | Authors have authority,                                                                                                                                                              | Yes        | Argument is clear                                                                                                                                                                                                 | Yes        | Worldwide context, relates                                 | Yes         | Authors standpoint is clear on                                                                                 | Yes        | Context of article identifiable                                       | Yes          | Contributes the importance                     |

| Reference                                                                                                       | Authority  |                                                                                          | Accuracy   |                                    | Coverage   |                                                                                                                                   | Objectivity |                                                               | Date       |                                                                       | Significance |                                                                                                                       |
|-----------------------------------------------------------------------------------------------------------------|------------|------------------------------------------------------------------------------------------|------------|------------------------------------|------------|-----------------------------------------------------------------------------------------------------------------------------------|-------------|---------------------------------------------------------------|------------|-----------------------------------------------------------------------|--------------|-----------------------------------------------------------------------------------------------------------------------|
|                                                                                                                 | Yes or no? | Comment                                                                                  | Yes or no? | Comment                            | Yes or no? | Comment                                                                                                                           | Yes or no?  | Comment                                                       | Yes or no? | Comment                                                               | Yes or no?   | Comment                                                                                                               |
| does ("good") HRM make? <i>Human Resources for Health [Electronic Resource]</i> . 2004;2(1):6 .                 |            | relevant references included. Published in peer-reviewed journal                         |            | and balanced                       |            | discussion to meeting the sustainable development goals, and discusses the role of human resource management in the health system |             | the importance of human resource management                   |            | e. Key contemporary references included                               |              | e of implementing, disseminating and sustaining good HRM in health systems                                            |
| Buchan JM, Naccarella L, Brooks PM. Is health workforce sustainability in Australia and New Zealand a realistic | Yes        | Authors have authority, relevant references included. Published in peer-reviewed journal | Yes        | Brief clear and met, peer reviewed | Yes        | Australia and New Zealand context                                                                                                 | Yes         | Author bias not explicitly stated, but standpoint is balanced | Yes        | Context of article identifiable. Key contemporary references included | Yes          | Important argument that the health systems in Australia and New Zealand need more focus on prevention, and increasing |

| Reference                                                                                                                             | Authority  |                                                                                          | Accuracy   |                                            | Coverage   |                                               | Objectivity |                                                                                                     | Date       |                                                                                                                         | Significance |                                                 |
|---------------------------------------------------------------------------------------------------------------------------------------|------------|------------------------------------------------------------------------------------------|------------|--------------------------------------------|------------|-----------------------------------------------|-------------|-----------------------------------------------------------------------------------------------------|------------|-------------------------------------------------------------------------------------------------------------------------|--------------|-------------------------------------------------|
|                                                                                                                                       | Yes or no? | Comment                                                                                  | Yes or no? | Comment                                    | Yes or no? | Comment                                       | Yes or no?  | Comment                                                                                             | Yes or no? | Comment                                                                                                                 | Yes or no?   | Comment                                         |
| policy goal?<br><i>Australian health review: a publication of the Australian Hospital Association</i> .<br>2011;35(2):152-155.        |            |                                                                                          |            |                                            |            |                                               |             |                                                                                                     |            |                                                                                                                         |              | the productivity of the health system           |
| Burgess LH, Cohen MR, Denham CR. A new leadership role for pharmacists: a prescription for change. <i>Journal of patient safety</i> . | Yes        | Authors have authority, relevant references included. Published in peer-reviewed journal | Yes        | Aim and method well defined and adhered to | Yes        | Worldwide, focusing on pharmacists as leaders | Yes         | Author bias not explicitly stated, but standpoint is balanced and based on peer-reviewed literature | Yes        | Context of article identifiable but date range of literature search not disclosed. Key contemporary references included | Yes          | Argues for the importance of pharmacist leaders |



| Reference                                                                                                                              | Authority  |                                                                                          | Accuracy   |                                                                                                     | Coverage   |                                                      | Objectivity |                                                               | Date       |                                                                       | Significance |                                                                                                                                |
|----------------------------------------------------------------------------------------------------------------------------------------|------------|------------------------------------------------------------------------------------------|------------|-----------------------------------------------------------------------------------------------------|------------|------------------------------------------------------|-------------|---------------------------------------------------------------|------------|-----------------------------------------------------------------------|--------------|--------------------------------------------------------------------------------------------------------------------------------|
|                                                                                                                                        | Yes or no? | Comment                                                                                  | Yes or no? | Comment                                                                                             | Yes or no? | Comment                                              | Yes or no?  | Comment                                                       | Yes or no? | Comment                                                               | Yes or no?   | Comment                                                                                                                        |
| 2010;6(1):31-37.                                                                                                                       |            |                                                                                          |            |                                                                                                     |            |                                                      |             |                                                               |            |                                                                       |              |                                                                                                                                |
| Casale CR, Clancy CM. Commentary: Not about us without us. <i>Academic Medicine</i> . 2009;84(10):1333-1335.                           | Yes        | Authors have authority, relevant references included. Published in peer-reviewed journal | Yes        | Clear brief to argue for the use of community-based participatory research for improving healthcare | Yes        | Focus on United States of America health system      | Yes         | Author bias not stated, but recognises the bias in healthcare | Yes        | Context of article identifiable. Key contemporary references included | Yes          | Presents theoretical arguments for community-based participatory research in response to another article in the journal        |
| Cashin A. The challenge of nurse innovation in the Australian context of universal health care. <i>Collegian</i> . 2015;22(3):319-324. | Yes        | Authors have authority, relevant references included. Published in peer-reviewed journal | Yes        | Brief clear and met, no method provided                                                             | Yes        | Focus on Australian context, with emphasis on nurses | Yes         | Author bias not explicitly stated, but standpoint is balanced | Yes        | Context of article identifiable. Key contemporary references included | Yes          | Important article in detailing the concept of universal healthcare applied to Australia to empower nurse led health innovation |

| Reference                                                                                                                                                               | Authority  |                                                      | Accuracy   |                                                                                                                          | Coverage   |                                                                        | Objectivity |                                                               | Date       |                                                                       | Significance |                                                                             |
|-------------------------------------------------------------------------------------------------------------------------------------------------------------------------|------------|------------------------------------------------------|------------|--------------------------------------------------------------------------------------------------------------------------|------------|------------------------------------------------------------------------|-------------|---------------------------------------------------------------|------------|-----------------------------------------------------------------------|--------------|-----------------------------------------------------------------------------|
|                                                                                                                                                                         | Yes or no? | Comment                                              | Yes or no? | Comment                                                                                                                  | Yes or no? | Comment                                                                | Yes or no?  | Comment                                                       | Yes or no? | Comment                                                               | Yes or no?   | Comment                                                                     |
| Chambers DA, Glasgow RE, Stange KC. The dynamic sustainability framework: addressing the paradox of sustainment amid ongoing change. <i>Implement Sci.</i> 2013;8:117 . | Yes        | Authors have authority, relevant references included | Yes        | Aim of research is clear in responding to two frequent assumptions about sustainability (voltage drop and program drift) | Yes        | Specific to United States of America health system                     | Yes         | Bias not explicitly stated but authors standpoint is balanced | Yes        | Context of article identifiable. Key contemporary references included | Yes          | Significant as it adds the Dynamic Sustainability Network to the literature |
| Coiera E, Hovenga EJ. Building a sustainable health system. <i>Yearb Med</i>                                                                                            | Yes        | Authors have authority, relevant references included | Yes        | Research aim identified and met                                                                                          | Yes        | Worldwide, but focuses on the sustainability of current health systems | Yes         | Bias not explicitly stated but is present                     | Yes        | Context of article identifiable. Key contemporary references included | Yes          | Important article with advice on the measurement and improvement of         |

| Reference                                                                                                                | Authority  |                                                                                                                                                                        | Accuracy   |                                                                                                                                                                    | Coverage   |                                           | Objectivity |                                                   | Date       |                                                                                                                                              | Significance |                                                                                                                                            |
|--------------------------------------------------------------------------------------------------------------------------|------------|------------------------------------------------------------------------------------------------------------------------------------------------------------------------|------------|--------------------------------------------------------------------------------------------------------------------------------------------------------------------|------------|-------------------------------------------|-------------|---------------------------------------------------|------------|----------------------------------------------------------------------------------------------------------------------------------------------|--------------|--------------------------------------------------------------------------------------------------------------------------------------------|
|                                                                                                                          | Yes or no? | Comment                                                                                                                                                                | Yes or no? | Comment                                                                                                                                                            | Yes or no? | Comment                                   | Yes or no?  | Comment                                           | Yes or no? | Comment                                                                                                                                      | Yes or no?   | Comment                                                                                                                                    |
| Inform 2007:11-8.                                                                                                        |            |                                                                                                                                                                        |            |                                                                                                                                                                    |            |                                           |             |                                                   |            |                                                                                                                                              |              | health system sustainability                                                                                                               |
| Crisp N. What would a sustainable health and care system look like? <i>BMJ (Clinical research ed.)</i> . 2017;358:j3895. | Yes        | Authors have authority as a member of the House of Lords (and is talking specifically about the NHS), relevant references included. Published in peer-reviewed journal | Yes        | Clear brief to argue that sustainability depends on seven factors and that cross-sectional partnerships are needed to increase resilience. No methodology provided | Yes        | NHS specific                              | Yes         | Authors standpoint is clear in their argument     | Yes        | No date specifically, but from 1978 at the Alma Ata Declaration onwards to time of publication (2017). Contemporary references also included | Yes          | Recognition of some factors that need more attention, and also needs further underpinning by the economy and through creative partnerships |
| Delgado, P. 2016. Meeting the Challenge                                                                                  | Yes        | Authors have authority, relevant references                                                                                                                            | Yes        | Aim to explore the aims of the Atlantic                                                                                                                            | Yes        | Designed to answer or discuss the aim. No | Yes         | Bias not explicitly stated but authors standpoint | Yes        | Context of article identifiable but not specific to                                                                                          | Yes          | Contributes questions and suggestions                                                                                                      |

| Reference                                                                                                                     | Authority  |                                                                                          | Accuracy   |                                                                                                                                    | Coverage   |                                                                                                  | Objectivity |                                                                           | Date       |                                                                                                                                                               | Significance |                                                                |
|-------------------------------------------------------------------------------------------------------------------------------|------------|------------------------------------------------------------------------------------------|------------|------------------------------------------------------------------------------------------------------------------------------------|------------|--------------------------------------------------------------------------------------------------|-------------|---------------------------------------------------------------------------|------------|---------------------------------------------------------------------------------------------------------------------------------------------------------------|--------------|----------------------------------------------------------------|
|                                                                                                                               | Yes or no? | Comment                                                                                  | Yes or no? | Comment                                                                                                                            | Yes or no? | Comment                                                                                          | Yes or no?  | Comment                                                                   | Yes or no? | Comment                                                                                                                                                       | Yes or no?   | Comment                                                        |
| of Chronic Conditions in a Sustainable Manner: Building on the AHC Learning. Healthc Pap 15 Spec No:90-95; discussion 97-123. |            | included. Published in peer-reviewed journal                                             |            | Healthcare Collaboration for Innovation and Improvement in Chronic Disease (AHC) and its areas of success and possible improvement |            | specific method section, but qualitative and quantitative methods employed in a separate article |             | is clear and based on evidence from past research                         |            | a particular 'date' e.g., research in area was published in 2005, whilst opinion piece published in 2016. However, other key contemporary references included |              | s for future research                                          |
| Dhalla I. Canada's health care system and the sustainability paradox. <i>Cmaj</i> . 2007;177(1):51-53.                        | Yes        | Authors have authority, relevant references included. Published in peer-reviewed journal | Yes        | Brief stated, view is balanced with arguments from opposing view                                                                   | Yes        | Specific to Canadian health system, with Ontario as an example                                   | Yes         | Bias not explicitly stated, but work seems well balanced and acknowledges | Yes        | Context of article identifiable. Key contemporary references included                                                                                         | Yes          | Argument is relevant and adds new ideas to existing literature |

| Reference                                                                                                                                                                                         | Authority  |                                                                                          | Accuracy   |                                                          | Coverage   |                                                             | Objectivity |                                                                       | Date       |                                                               | Significance |                                                     |
|---------------------------------------------------------------------------------------------------------------------------------------------------------------------------------------------------|------------|------------------------------------------------------------------------------------------|------------|----------------------------------------------------------|------------|-------------------------------------------------------------|-------------|-----------------------------------------------------------------------|------------|---------------------------------------------------------------|--------------|-----------------------------------------------------|
|                                                                                                                                                                                                   | Yes or no? | Comment                                                                                  | Yes or no? | Comment                                                  | Yes or no? | Comment                                                     | Yes or no?  | Comment                                                               | Yes or no? | Comment                                                       | Yes or no?   | Comment                                             |
|                                                                                                                                                                                                   |            |                                                                                          |            |                                                          |            |                                                             |             | counter-arguments                                                     |            |                                                               |              |                                                     |
| Edwards, N., M. Rowan, P. Marck, and D. Grinspun. 2011. Understanding whole systems change in health care: the case of nurse practitioners in Canada. <i>Policy Polit Nurs Pract</i> 12 (1):4-17. | Yes        | Authors have authority, relevant references included. Published in peer-reviewed journal | Yes        | Clear aim and methods provided                           | Yes        | Specific to Canadian healthcare system                      | Yes         | Bias not stated, article is balanced and limitations are acknowledged | Yes        | Contemporary references included                              | Yes          | Relevant to Canada's healthcare system              |
| Ellner, A. L., S. Stout, E. E. Sullivan, E. P. Griffiths,                                                                                                                                         | Yes        | Authors have authority, relevant references included.                                    | Yes        | Aim to argue for increased support for health innovators | Yes        | Define the scope of their article in introduction: defining | Yes         | Argue that increased support is needed to advance healthcare          | Yes        | Context of article identifiable but not specific (identified) | Yes          | Relevant to US academic medicine, educating medical |

| Reference                                                                                                                                                                                             | Authority  |                                             | Accuracy   |                                                                           | Coverage   |                                                                                                                                                            | Objectivity |                                                   | Date       |                                                                   | Significance |                                                                |
|-------------------------------------------------------------------------------------------------------------------------------------------------------------------------------------------------------|------------|---------------------------------------------|------------|---------------------------------------------------------------------------|------------|------------------------------------------------------------------------------------------------------------------------------------------------------------|-------------|---------------------------------------------------|------------|-------------------------------------------------------------------|--------------|----------------------------------------------------------------|
|                                                                                                                                                                                                       | Yes or no? | Comment                                     | Yes or no? | Comment                                                                   | Yes or no? | Comment                                                                                                                                                    | Yes or no?  | Comment                                           | Yes or no? | Comment                                                           | Yes or no?   | Comment                                                        |
| A. Mountjoy, and R. S. Phillips. 2015. Health Systems Innovation at Academic Health Centers: Leading in a New Era of Health Care Delivery. Acad Med 90 (7):872-880. doi:10.1097/acm.0000000000000679. |            | Published in peer-reviewed journal          |            | in academic health centres in the US, and define health system innovation |            | health system innovation, distinguishing it from quality improvement, and examining career opportunities for those who will lead health systems innovation |             | goals in academic health centers                  |            | as 21st century in article). Key contemporary references included |              | students, and trying to allow healthcare at a sustainable cost |
| Fineberg HV. Shattuck Lecture. A successful                                                                                                                                                           | Yes        | Authors have authority, relevant references | Yes        | Clear examination of USA health system                                    | Yes        | American healthcare context                                                                                                                                | Yes         | Author bias not explicitly stated, but standpoint | Yes        | Context of article identifiable as after the 2010                 | Yes          | Recognises that many steps are needed to                       |

| Reference                                                                                                            | Authority  |                                                      | Accuracy   |                                         | Coverage   |                                                         | Objectivity |                                                          | Date       |                                                                                  | Significance |                                                                                                   |
|----------------------------------------------------------------------------------------------------------------------|------------|------------------------------------------------------|------------|-----------------------------------------|------------|---------------------------------------------------------|-------------|----------------------------------------------------------|------------|----------------------------------------------------------------------------------|--------------|---------------------------------------------------------------------------------------------------|
|                                                                                                                      | Yes or no? | Comment                                              | Yes or no? | Comment                                 | Yes or no? | Comment                                                 | Yes or no?  | Comment                                                  | Yes or no? | Comment                                                                          | Yes or no?   | Comment                                                                                           |
| and sustainable health system-- how to get there from here. New England Journal of Medicine. 2012;366(11):1020-1027. |            | included. Published in peer-reviewed journal         |            | and how to increase its sustainability  |            |                                                         |             | is balanced                                              |            | Patient Protection and Affordable Care Act. Key contemporary references included |              | ensure a sustainable health system, and identifies characteristics of a sustainable health system |
| Gruen RL, Elliott JH, Nolan ML, Lawton PD, Parkhill A, McLaren CJ, Lavis JN.                                         | Yes        | Authors have authority, relevant references included | Yes        | Research aim and methods stated and met | Yes        | Scope of article clearly defined                        | Yes         | Author bias not stated but viewpoint is balanced         | Yes        | Context of article identifiable. Key contemporary references included            | Yes          | Contributes to conversation around health system sustainability                                   |
| Greenhalgh, T., F. Macfarlane, C. Barton-Sweeney, and F. Woodard.                                                    | Yes        | Authors have authority, relevant references included | Yes        | Research aim and methods stated and met | Yes        | Based in London health system, but significance extends | Yes         | Bias minimized through administering of questionnaire by | Yes        | Context of article identifiable. Key contemporary                                | Yes          | Important article with significance for improving and                                             |

| Reference                                                                                                                                                                         | Authority  |                                                                                          | Accuracy   |                                         | Coverage   |                                 | Objectivity |                                                               | Date       |                                                                                                  | Significance |                                                                                  |
|-----------------------------------------------------------------------------------------------------------------------------------------------------------------------------------|------------|------------------------------------------------------------------------------------------|------------|-----------------------------------------|------------|---------------------------------|-------------|---------------------------------------------------------------|------------|--------------------------------------------------------------------------------------------------|--------------|----------------------------------------------------------------------------------|
|                                                                                                                                                                                   | Yes or no? | Comment                                                                                  | Yes or no? | Comment                                 | Yes or no? | Comment                         | Yes or no?  | Comment                                                       | Yes or no? | Comment                                                                                          | Yes or no?   | Comment                                                                          |
| 2012. "If we build it, will it stay?" A case study of the sustainability of whole-system change in London. <i>Milbank Q</i> 90 (3):516-547. doi:10.1111/j.1468-0009.2012.00673.x. |            |                                                                                          |            |                                         |            | beyond that                     |             | blinded researchers                                           |            | references included                                                                              |              | scaling system change that can be applied to other health systems                |
| Guyon A, Hancock T, Kirk M, et al. The weakening of public health: A threat to population health and                                                                              | Yes        | Authors have authority, relevant references included. Published in peer-reviewed journal | Yes        | Brief clear and met, no method provided | Yes        | Focus on Canadian health system | Yes         | Author bias not explicitly stated, but standpoint is balanced | Yes        | Context of article identifiable and discusses current government policy (at time of publication) | Yes          | Identifies issues with government approach to public health and responds to each |



| Reference                                                                                                                                           | Authority  |                                                                                                       | Accuracy   |                                         | Coverage   |                                                                  | Objectivity |                                                                                                          | Date       |                                                                                | Significance |                                                                                                      |
|-----------------------------------------------------------------------------------------------------------------------------------------------------|------------|-------------------------------------------------------------------------------------------------------|------------|-----------------------------------------|------------|------------------------------------------------------------------|-------------|----------------------------------------------------------------------------------------------------------|------------|--------------------------------------------------------------------------------|--------------|------------------------------------------------------------------------------------------------------|
|                                                                                                                                                     | Yes or no? | Comment                                                                                               | Yes or no? | Comment                                 | Yes or no? | Comment                                                          | Yes or no?  | Comment                                                                                                  | Yes or no? | Comment                                                                        | Yes or no?   | Comment                                                                                              |
| health care system sustainability.<br><i>Canadian Journal of Public Health.</i><br><i>Revue Canadienne de Sante Publique.</i><br>2017;108(1):e1-e6. |            |                                                                                                       |            |                                         |            |                                                                  |             |                                                                                                          |            | n) in Canada.<br>Key contemporary references included                          |              |                                                                                                      |
| Hovenga EJ. Impact of data governance on a nation's healthcare system building blocks.<br><i>Studies in Health Technology &amp; Informatics</i>     | Partially  | Authors have authority, relevant references included. Unable to determine if journal is peer-reviewed | Yes        | Brief clear and met, no method provided | Yes        | Worldwide, focusing on 'a nation' to explain national healthcare | Yes         | Author bias not explicitly stated, standpoint based on reputable sources e.g., world health organisation | Yes        | Context of article identified as current. Key contemporary references included | Yes          | Important article educating readers about IT and healthcare and sustainability of that health system |

| Reference                                                                                                                                                                                             | Authority  |                                                                                          | Accuracy   |                                                       | Coverage   |                                                | Objectivity |                                                             | Date       |                                                                       | Significance |                                                                                    |
|-------------------------------------------------------------------------------------------------------------------------------------------------------------------------------------------------------|------------|------------------------------------------------------------------------------------------|------------|-------------------------------------------------------|------------|------------------------------------------------|-------------|-------------------------------------------------------------|------------|-----------------------------------------------------------------------|--------------|------------------------------------------------------------------------------------|
|                                                                                                                                                                                                       | Yes or no? | Comment                                                                                  | Yes or no? | Comment                                               | Yes or no? | Comment                                        | Yes or no?  | Comment                                                     | Yes or no? | Comment                                                               | Yes or no?   | Comment                                                                            |
| 2013;193:24-66.                                                                                                                                                                                       |            |                                                                                          |            |                                                       |            |                                                |             |                                                             |            |                                                                       |              |                                                                                    |
| Inotai A, Petrova G, Vitezic D, Kalo Z. Benefits of investment into modern medicines in Central-Eastern European countries. Expert review of pharmacoeconomics & outcomes research. 2014;14(1):71-79. | Yes        | Authors have authority, relevant references included. Published in peer-reviewed journal | Yes        | Aim clearly stated and adhered to. No method provided | Yes        | Specific to Central Eastern European countries | Yes         | Authors standpoint is balanced, citing research and the WHO | Yes        | Context of article identifiable. Key contemporary references included | Yes          | Relevant, useful arguments for Central Eastern European health systems to consider |
| Kepros JP, Opreanu RC. A new model for                                                                                                                                                                | Yes        | Authors have authority, relevant                                                         | Yes        | Brief stated and examines the                         | Yes        | United States of America                       | Yes         | Authors standpoint clear, bias not                          | Yes        | Context of article identifiable. Key                                  | Yes          | Adds historical context to relationshi                                             |

| Reference                                                                                                                                                  | Authority  |                                                         | Accuracy   |                                                                         | Coverage   |                                                                        | Objectivity |                                                               | Date       |                                                                       | Significance |                                                                                                                         |
|------------------------------------------------------------------------------------------------------------------------------------------------------------|------------|---------------------------------------------------------|------------|-------------------------------------------------------------------------|------------|------------------------------------------------------------------------|-------------|---------------------------------------------------------------|------------|-----------------------------------------------------------------------|--------------|-------------------------------------------------------------------------------------------------------------------------|
|                                                                                                                                                            | Yes or no? | Comment                                                 | Yes or no? | Comment                                                                 | Yes or no? | Comment                                                                | Yes or no?  | Comment                                                       | Yes or no? | Comment                                                               | Yes or no?   | Comment                                                                                                                 |
| health care delivery. <i>BMC health services research</i> . 2009;9:57.                                                                                     |            | references included. Published in peer-reviewed journal |            | evolving relationship between hospitals, medical schools and physicians |            | health system                                                          |             | explicitly mentioned                                          |            | contemporary references included                                      |              | p between medical schools, hospitals and physicians, and examines the shared vision for the future                      |
| Knutson, D. J. 1997. The role of strategic alliances in ensuring health care quality: a health care system perspective. <i>Clin Ther</i> 19 (6):1572-1578. | Partially  | Authors have authority, but no references included      | Yes        | Brief clear and met, no method provided                                 | Yes        | Specific to HealthSystems Minnesota, but may be applicable more widely | Yes         | Author bias not explicitly stated, but standpoint is balanced | Yes        | Context of article identifiable. Key contemporary references included | Yes          | Important article that focuses on the Chronic Illness Management Research and Development Project (CIMRDP) in Minnesota |
| Lehoux P, Williams-Jones B,                                                                                                                                | Yes        | Authors are associated                                  | Yes        | Authors clear experts in                                                | Yes        | Coverage is worldwide                                                  | Yes         | Authors have more knowledge                                   | Yes        | Context of article identifiable                                       | Yes          | Applicable worldwide for                                                                                                |

| Reference                                                                                                                                                                                                                | Authority  |                                                                                   | Accuracy   |                                                                                                                        | Coverage   |                                                                                                                 | Objectivity |                                                                                                                                                                                                                                            | Date       |                                         | Significance |                                                                                                                           |
|--------------------------------------------------------------------------------------------------------------------------------------------------------------------------------------------------------------------------|------------|-----------------------------------------------------------------------------------|------------|------------------------------------------------------------------------------------------------------------------------|------------|-----------------------------------------------------------------------------------------------------------------|-------------|--------------------------------------------------------------------------------------------------------------------------------------------------------------------------------------------------------------------------------------------|------------|-----------------------------------------|--------------|---------------------------------------------------------------------------------------------------------------------------|
|                                                                                                                                                                                                                          | Yes or no? | Comment                                                                           | Yes or no? | Comment                                                                                                                | Yes or no? | Comment                                                                                                         | Yes or no?  | Comment                                                                                                                                                                                                                                    | Yes or no? | Comment                                 | Yes or no?   | Comment                                                                                                                   |
| Miller F, Urbach D, Tailliez S. What leads to better health care innovation? Arguments for an integrated policy-oriented research agenda. <i>Journal of Health Services &amp; Research Policy</i> . 2008;13(4): 251-254. |            | with reputable organisations in their fields. Published in peer reviewed journal. |            | the field within the Canadian Health system, and contemporary references are cited. Published in peer reviewed journal |            | with very broad factors of sustainability being discussed, drawing on a workshop at an international conference |             | regarding Canadian system than worldwide and this is stated. The participants from the workshop at the Invitational Workshop of Innovations in Health, from which this paper arose, included participants from Canada, England, Wales, and |            | e. Key contemporary references included |              | industrialized countries to adopt a new kind of policy-oriented research based on relevance, usability and sustainability |

| Reference                                                                                       | Authority  |                                                                                          | Accuracy   |         | Coverage   |                                           | Objectivity |                                                                                                                                               | Date       |         | Significance |         |
|-------------------------------------------------------------------------------------------------|------------|------------------------------------------------------------------------------------------|------------|---------|------------|-------------------------------------------|-------------|-----------------------------------------------------------------------------------------------------------------------------------------------|------------|---------|--------------|---------|
|                                                                                                 | Yes or no? | Comment                                                                                  | Yes or no? | Comment | Yes or no? | Comment                                   | Yes or no?  | Comment                                                                                                                                       | Yes or no? | Comment | Yes or no?   | Comment |
|                                                                                                 |            |                                                                                          |            |         |            |                                           |             | Finland. The event was funded by various Canadian grants. This standpoint is clear by the Authors, and yet their opinion piece seems balanced |            |         |              |         |
| Levin L, Goeree R, Levine M, et al. Coverage with evidence development: the Ontario experience. | Yes        | Authors have authority, relevant references included. Published in peer-reviewed journal | Yes        |         | Yes        | Focus on health system in Ontario, Canada | Yes         |                                                                                                                                               |            |         |              |         |

| Reference                                                                                                                                       | Authority  |                                                                                          | Accuracy   |                                         | Coverage   |                                  | Objectivity |                                                               | Date       |                                                                       | Significance |                                                                                                         |
|-------------------------------------------------------------------------------------------------------------------------------------------------|------------|------------------------------------------------------------------------------------------|------------|-----------------------------------------|------------|----------------------------------|-------------|---------------------------------------------------------------|------------|-----------------------------------------------------------------------|--------------|---------------------------------------------------------------------------------------------------------|
|                                                                                                                                                 | Yes or no? | Comment                                                                                  | Yes or no? | Comment                                 | Yes or no? | Comment                          | Yes or no?  | Comment                                                       | Yes or no? | Comment                                                               | Yes or no?   | Comment                                                                                                 |
| International journal of technology assessment in health care. 2011;27(2):159-168.                                                              |            |                                                                                          |            |                                         |            |                                  |             |                                                               |            |                                                                       |              |                                                                                                         |
| Lewis S. Can a learning-disabled nation learn healthcare lessons from abroad? <i>Healthcare policy = Politiques de sante</i> . 2007;3(2):19-28. | Yes        | Authors have authority, relevant references included. Published in peer-reviewed journal | Yes        | Brief clear and met, no method provided | Yes        | Focus on Canadian health system  | Yes         | Author bias not explicitly stated, but standpoint is balanced | Yes        | Context of article identifiable. Key contemporary references included | Yes          | Unique perspective, arguing for the focus on other aspects of the health system than its sustainability |
| Liaropoulos L, Goranitis I. Health care                                                                                                         | Yes        | Authors have authority, relevant                                                         | Yes        | Brief clear and met, no method provided | Yes        | Worldwide, but focusing on cost- | Yes         | Author bias not explicitly stated, but                        | Yes        | Context of article identifiable. Key                                  | Yes          | Investigates the sustainability of                                                                      |

| Reference                                                                                                                                                         | Authority  |                                                                                 | Accuracy   |                                                         | Coverage   |                                 | Objectivity |                                                                                                                                       | Date       |                                                                       | Significance |                                                                                                                   |
|-------------------------------------------------------------------------------------------------------------------------------------------------------------------|------------|---------------------------------------------------------------------------------|------------|---------------------------------------------------------|------------|---------------------------------|-------------|---------------------------------------------------------------------------------------------------------------------------------------|------------|-----------------------------------------------------------------------|--------------|-------------------------------------------------------------------------------------------------------------------|
|                                                                                                                                                                   | Yes or no? | Comment                                                                         | Yes or no? | Comment                                                 | Yes or no? | Comment                         | Yes or no?  | Comment                                                                                                                               | Yes or no? | Comment                                                               | Yes or no?   | Comment                                                                                                           |
| financing and the sustainability of health systems. <i>International journal for equity in health</i> . 2015;14:80 .                                              |            | references included. Published in peer-reviewed journal                         |            |                                                         |            | effectiveness of health systems |             | standpoint is balanced                                                                                                                |            | contemporary references included                                      |              | healthcare financing around the world                                                                             |
| Lozano I, Rondan J, Vegas JM, Segovia E. Sustainability of the Health System: Beyond Cost-effectiveness Analyses. <i>Revista española de cardiología (English</i> | Partially  | Authors have authority, relevant references included. Journal not peer-reviewed | Yes        | Brief clear in replying to original article. No methods | Yes        | Spanish health system context   | Yes         | Author bias not explicitly stated, but standpoint is balanced in addressing original article's viewpoint and rebutting as appropriate | Yes        | Context of article identifiable. Key contemporary references included | Yes          | Argues that the Spanish health system has many strengths, but one of its weaknesses is the lack of sustainability |

| Reference                                                                                                                                                                                                                    | Authority  |                                                                                          | Accuracy   |                                         | Coverage   |                         | Objectivity |                                                               | Date       |                                                                                                            | Significance |                                                                                                                   |
|------------------------------------------------------------------------------------------------------------------------------------------------------------------------------------------------------------------------------|------------|------------------------------------------------------------------------------------------|------------|-----------------------------------------|------------|-------------------------|-------------|---------------------------------------------------------------|------------|------------------------------------------------------------------------------------------------------------|--------------|-------------------------------------------------------------------------------------------------------------------|
|                                                                                                                                                                                                                              | Yes or no? | Comment                                                                                  | Yes or no? | Comment                                 | Yes or no? | Comment                 | Yes or no?  | Comment                                                       | Yes or no? | Comment                                                                                                    | Yes or no?   | Comment                                                                                                           |
| <i>ed.</i> ).<br>2016;69(9):<br>880-881.                                                                                                                                                                                     |            |                                                                                          |            |                                         |            |                         |             |                                                               |            |                                                                                                            |              |                                                                                                                   |
| Mackenzie J. The old care paradigm is dead, long live the new sustainable care paradigm: how can GP commissioning consortia meet the demand challenges of 21st century healthcare?<br><i>London journal of primary care.</i> | Yes        | Authors have authority, relevant references included. Published in peer-reviewed journal | Yes        | Brief clear and met, no method provided | Yes        | Focus on United Kingdom | Yes         | Author bias not explicitly stated, but standpoint is balanced | Yes        | Context of article identifiable as beginning from 1948 until present. Key contemporary references included | Yes          | Examines the significance of prevention rather than treatment to increase the sustainability of the health system |



| Reference                                                                                                                                | Authority  |                                                                                          | Accuracy   |                                                           | Coverage   |                                                 | Objectivity |                                                               | Date       |                                                                       | Significance |                                                                          |
|------------------------------------------------------------------------------------------------------------------------------------------|------------|------------------------------------------------------------------------------------------|------------|-----------------------------------------------------------|------------|-------------------------------------------------|-------------|---------------------------------------------------------------|------------|-----------------------------------------------------------------------|--------------|--------------------------------------------------------------------------|
|                                                                                                                                          | Yes or no? | Comment                                                                                  | Yes or no? | Comment                                                   | Yes or no? | Comment                                         | Yes or no?  | Comment                                                       | Yes or no? | Comment                                                               | Yes or no?   | Comment                                                                  |
| 2011;4(1):64-68.                                                                                                                         |            |                                                                                          |            |                                                           |            |                                                 |             |                                                               |            |                                                                       |              |                                                                          |
| Magnan S, Fisher E, Kindig D, et al. Achieving accountability for health and health care. <i>Minnesota medicine</i> . 2012;95(11):37-39. | Partially  | Authors have authority, relevant references included. Journal not peer-reviewed          | Yes        | Clear aim that is fulfilled, no method supplied           | Yes        | Focus on United States of America health system | Yes         | Author bias not explicitly stated, but standpoint is balanced | Yes        | Context of article identifiable. Key contemporary references included | Yes          | Recognises the importance of the triple aim in healthcare sustainability |
| McGorry PD, Hamilton MP. Stepwise expansion of evidence-based care is needed for mental health reform. <i>The Medical</i>                | Yes        | Authors have authority, relevant references included. Published in peer-reviewed journal | Yes        | Brief well defined and adhered to. No methodology present | Yes        | focus on Australia and the mental health sector | Yes         | Author bias not explicitly stated, but standpoint is balanced | Yes        | Context of article identifiable. Key contemporary references included | Yes          | Recognises the challenges in the system of                               |

| Reference                                                                                                                                                   | Authority  |                                                                                          | Accuracy   |                                                                                     | Coverage   |                                                                                                  | Objectivity |                                                               | Date       |                                                                       | Significance |                                                                  |
|-------------------------------------------------------------------------------------------------------------------------------------------------------------|------------|------------------------------------------------------------------------------------------|------------|-------------------------------------------------------------------------------------|------------|--------------------------------------------------------------------------------------------------|-------------|---------------------------------------------------------------|------------|-----------------------------------------------------------------------|--------------|------------------------------------------------------------------|
|                                                                                                                                                             | Yes or no? | Comment                                                                                  | Yes or no? | Comment                                                                             | Yes or no? | Comment                                                                                          | Yes or no?  | Comment                                                       | Yes or no? | Comment                                                               | Yes or no?   | Comment                                                          |
| <i>Journal of Australia.</i> 2016;204(9):351-353.                                                                                                           |            |                                                                                          |            |                                                                                     |            |                                                                                                  |             |                                                               |            |                                                                       |              |                                                                  |
| McIntosh E, Nagelkerk J, Vonderheid SC, Poole M, Dontje K, Pohl JM. Financially viable nurse-managed centers. <i>Nurse Pract.</i> 2003;28(3):40, 46-48, 51. | Yes        | Authors have authority, relevant references included. Published in peer-reviewed journal | Yes        | Aim not clear, but brief clear and examples used to explain argument. Peer reviewed | Yes        | Focus on the role of finance committees in nurse managed centres in the United States of America | Yes         | Author bias not explicitly stated, but standpoint is balanced | Yes        | Context of article identifiable. Key contemporary references included | Yes          | Important article on nurse managed centres and how they function |
| Nagle LM, Pitts BM. Citizen perspectives on the future of                                                                                                   | Partially  | Authors have authority, relevant references included.                                    | Yes        | Brief clearly stated and met. No methods provided                                   | Yes        | Focus on health system in Ontario, Canada                                                        | Yes         | Author bias not explicitly stated, but standpoint             | Yes        | Date is explicit (comments on the panel that met from                 | Yes          | Summarises the recommendations for sustainability from           |

| Reference                                                                                                                                                                                 | Authority  |                                                                                          | Accuracy   |                                                     | Coverage   |                                                                    | Objectivity |                                                                                                  | Date       |                                                                                                                                    | Significance |                                                                                                           |
|-------------------------------------------------------------------------------------------------------------------------------------------------------------------------------------------|------------|------------------------------------------------------------------------------------------|------------|-----------------------------------------------------|------------|--------------------------------------------------------------------|-------------|--------------------------------------------------------------------------------------------------|------------|------------------------------------------------------------------------------------------------------------------------------------|--------------|-----------------------------------------------------------------------------------------------------------|
|                                                                                                                                                                                           | Yes or no? | Comment                                                                                  | Yes or no? | Comment                                             | Yes or no? | Comment                                                            | Yes or no?  | Comment                                                                                          | Yes or no? | Comment                                                                                                                            | Yes or no?   | Comment                                                                                                   |
| healthcare. <i>Healthcare Quarterly</i> . 2012;15(2): 40-45.                                                                                                                              |            | Journal not peer-reviewed                                                                |            |                                                     |            |                                                                    |             | is balanced                                                                                      |            | April-June 2011). Contemporary references also included                                                                            |              | the unique panel of Ontarians                                                                             |
| Pacifico Silva H, Lehoux P, Miller FA, Denis JL. Introducing responsible innovation in health: a policy-oriented framework. <i>Health Research Policy &amp; Systems</i> . 2018;16(1): 90. | Yes        | Authors have authority, relevant references included. Published in peer-reviewed journal | Yes        | Research aim identified and met. No method provided | Yes        | Worldwide, with examples from the United States and European Union | Yes         | Author bias not explicitly stated, but bias of technologies being discussed is explicitly stated | Yes        | Context related to responsible research and innovation in health, and thus is centred on when the research on this topic increased | Yes          | Contributes responsible innovations in health framework, with nine dimensions organised into five domains |
| Pencheon D. Developing a                                                                                                                                                                  | Yes        | Authors have authority, relevant                                                         | Yes        | Brief clear and met, no method provided             | Yes        | England NHS context                                                | Yes         | Author bias not explicitly stated, but                                                           | Yes        | Context identified as the five years                                                                                               | Yes          | Important article highlighting ways in                                                                    |

| Reference                                                                                                                                           | Authority  |                                                                                          | Accuracy   |                                                                                      | Coverage   |                                                                | Objectivity |                                                                                                                                | Date       |                                                                                      | Significance |                                                                                                    |
|-----------------------------------------------------------------------------------------------------------------------------------------------------|------------|------------------------------------------------------------------------------------------|------------|--------------------------------------------------------------------------------------|------------|----------------------------------------------------------------|-------------|--------------------------------------------------------------------------------------------------------------------------------|------------|--------------------------------------------------------------------------------------|--------------|----------------------------------------------------------------------------------------------------|
|                                                                                                                                                     | Yes or no? | Comment                                                                                  | Yes or no? | Comment                                                                              | Yes or no? | Comment                                                        | Yes or no?  | Comment                                                                                                                        | Yes or no? | Comment                                                                              | Yes or no?   | Comment                                                                                            |
| sustainable health and care system: lessons for research and policy. <i>Journal of Health Services &amp; Research Policy</i> . 2013;18(4):193-194.  |            | references included. Published in peer-reviewed journal                                  |            |                                                                                      |            |                                                                |             | standpoint is balanced                                                                                                         |            | previous to publication in 2013 (where future-proofing the healthcare was attempted) |              | which the health system can be sustained                                                           |
| Pronovost, P. J., C. G. Holzmueller, T. Callender, R. Demski, L. Winner, R. Day, J. M. Austin, S. M. Berenholtz, and M. R. Miller. 2016. Sustaining | Yes        | Authors have authority, relevant references included. Published in peer-reviewed journal | Yes        | Aim not explicit, but article brief is provided. Methodology provided and adhered to | Yes        | Specific and well defined: Johns Hopkins Hospital in 2012-2014 | Yes         | Authors clear that they conducted previous research in measuring results of sustainability improvement measures (2012) and the | Yes        | Clear date acknowledged from 2012 (initial results) to 2013                          | Yes          | Suggests quality could improve through applying the framework used at Johns Hopkins Hospital (JHH) |

| Reference                                                                                                                                  | Authority  |                                                                                          | Accuracy   |                                                                                                     | Coverage   |                              | Objectivity |                                                                                                                                 | Date       |                                                                       | Significance |                                                                                                                 |
|--------------------------------------------------------------------------------------------------------------------------------------------|------------|------------------------------------------------------------------------------------------|------------|-----------------------------------------------------------------------------------------------------|------------|------------------------------|-------------|---------------------------------------------------------------------------------------------------------------------------------|------------|-----------------------------------------------------------------------|--------------|-----------------------------------------------------------------------------------------------------------------|
|                                                                                                                                            | Yes or no? | Comment                                                                                  | Yes or no? | Comment                                                                                             | Yes or no? | Comment                      | Yes or no?  | Comment                                                                                                                         | Yes or no? | Comment                                                               | Yes or no?   | Comment                                                                                                         |
| Reliability on Accountability Measures at The Johns Hopkins Hospital. Jt Comm J Qual Patient Saf 42 (2):51-60.                             |            |                                                                                          |            |                                                                                                     |            |                              |             | author's efforts to sustain them                                                                                                |            |                                                                       |              |                                                                                                                 |
| Robertson TM, Lofgren RP. Where population health misses the mark: breaking the 80/20 rule. <i>Academic Medicine</i> . 2015;90(3):277-278. | Yes        | Authors have authority, relevant references included. Published in peer-reviewed journal | Yes        | No aim, but brief clearly stated. Relevant references included. Published in peer reviewed journal. | Yes        | United States health context | Yes         | Bias not explicitly stated but states the aim to reduce healthcare spending through analysis of medical insurance claim records | Yes        | Context of article identifiable. Key contemporary references included | Yes          | Adds to the argument of the importance of identifying health spending and working on reducing it where possible |

| Reference                                                                                                                                                                                                           | Authority  |                                                                                          | Accuracy   |                                                                                                                         | Coverage   |                                 | Objectivity |                                                               | Date       |                                                                       | Significance |                                                                                  |
|---------------------------------------------------------------------------------------------------------------------------------------------------------------------------------------------------------------------|------------|------------------------------------------------------------------------------------------|------------|-------------------------------------------------------------------------------------------------------------------------|------------|---------------------------------|-------------|---------------------------------------------------------------|------------|-----------------------------------------------------------------------|--------------|----------------------------------------------------------------------------------|
|                                                                                                                                                                                                                     | Yes or no? | Comment                                                                                  | Yes or no? | Comment                                                                                                                 | Yes or no? | Comment                         | Yes or no?  | Comment                                                       | Yes or no? | Comment                                                               | Yes or no?   | Comment                                                                          |
| Rosenberg-Yunger ZR, Daar AS, Singer PA, Martin DK. Healthcare sustainability and the challenges of innovation to biopharmaceuticals in Canada. <i>Health policy (Amsterdam, Netherlands)</i> . 2008;87(3):359-368. | Yes        | Authors have authority, relevant references included. Published in peer-reviewed journal | Yes        | Clear brief comprising three parts to review government response to biopharmaceuticals and health system sustainability | Yes        | Focus on Canada health system   | Yes         | Author bias not explicitly stated, but standpoint is balanced | Yes        | Context of article identifiable. Key contemporary references included | Yes          | Contributes recommendations for the field regarding access to biopharmaceuticals |
| Rosser, M. 2006. Advancing health system                                                                                                                                                                            | Partially  | Authors have authority, but no                                                           | Yes        | Research aim identified and met                                                                                         | Yes        | Focus on Canadian health system | Yes         | Clear from the article even though bias is not                | Yes        | Context of article covers from 1997 (inception                        | Yes          | Significance evident in the "lessons                                             |

| Reference                                                                                                               | Authority  |                                                  | Accuracy   |                                                                                                                                                             | Coverage   |                                                                                                             | Objectivity |                                                                                   | Date       |                                                                       | Significance |                                                                                                                 |
|-------------------------------------------------------------------------------------------------------------------------|------------|--------------------------------------------------|------------|-------------------------------------------------------------------------------------------------------------------------------------------------------------|------------|-------------------------------------------------------------------------------------------------------------|-------------|-----------------------------------------------------------------------------------|------------|-----------------------------------------------------------------------|--------------|-----------------------------------------------------------------------------------------------------------------|
|                                                                                                                         | Yes or no? | Comment                                          | Yes or no? | Comment                                                                                                                                                     | Yes or no? | Comment                                                                                                     | Yes or no?  | Comment                                                                           | Yes or no? | Comment                                                               | Yes or no?   | Comment                                                                                                         |
| integration through supply chain improvement. Healthc Q 9 (1):62-66, 64.                                                |            | references included                              |            |                                                                                                                                                             |            |                                                                                                             |             | specifically mentioned that the stance of the article is that HMMS are beneficial |            | of HMMS) and 2006 (article publication). No references included       |              | learned" section                                                                                                |
| Scott IA. Is modern medicine at risk of losing the plot? <i>The Medical journal of Australia</i> . 2006;185(4):213-216. | Yes        | Authors have authority, journal is peer-reviewed | Yes        | Examines if pledges by Australian Government for improvements to healthcare are sustainable financially, and in terms of behaviour change on the front line | Yes        | Specific to Australian population healthcare spending, and the private health insurance system of Australia | Yes         | Clear opinion but well balanced argument                                          | Yes        | Context of article identifiable. Key contemporary references included | Yes          | Relevant, adds context to Australian health. Encourages different aspects of the health system to work together |

| Reference                                                                                                                                              | Authority  |                                                                                          | Accuracy   |                                                 | Coverage   |                                                          | Objectivity |                                                                                                              | Date       |                                                                       | Significance |                                                                                                                      |
|--------------------------------------------------------------------------------------------------------------------------------------------------------|------------|------------------------------------------------------------------------------------------|------------|-------------------------------------------------|------------|----------------------------------------------------------|-------------|--------------------------------------------------------------------------------------------------------------|------------|-----------------------------------------------------------------------|--------------|----------------------------------------------------------------------------------------------------------------------|
|                                                                                                                                                        | Yes or no? | Comment                                                                                  | Yes or no? | Comment                                         | Yes or no? | Comment                                                  | Yes or no?  | Comment                                                                                                      | Yes or no? | Comment                                                               | Yes or no?   | Comment                                                                                                              |
| Sepehri A, Chernomas R. Is the Canadian health care system fiscally sustainable? <i>International Journal of Health Services</i> . 2004;34(2):229-243. | Yes        | Authors have authority, relevant references included. Published in peer-reviewed journal | Yes        | Brief clearly described and met. No methodology | Yes        | Specific to Canadian context                             | Yes         | Contains well balanced review of literature, and compares the health systems of Canada and the United States | Yes        | Context of article identifiable. Key contemporary references included | Yes          | Argued for the best way to increase the sustainability and economic viability of the national Canadian health system |
| Shigayeva A, Coker RJ. Communicable disease control programmes and health systems: an analytical approach to sustainabili                              | Yes        | Authors have authority, relevant references included. Published in peer-reviewed journal | Yes        | Aim clearly stated and met. No methodology      | Yes        | Worldwide context, but focus on disease control programs | Yes         | Author bias not explicitly stated, but standpoint is balanced                                                | Yes        | Context of article identifiable. Key contemporary references included | Yes          | Important article that proposes characteristics and a framework that may have the potential for sustainability       |



| Reference                                                                                                                                                                            | Authority  |                                                                                          | Accuracy   |                                                                                     | Coverage   |                                                 | Objectivity |                                                                                                                 | Date       |                                                                       | Significance |                                                                     |
|--------------------------------------------------------------------------------------------------------------------------------------------------------------------------------------|------------|------------------------------------------------------------------------------------------|------------|-------------------------------------------------------------------------------------|------------|-------------------------------------------------|-------------|-----------------------------------------------------------------------------------------------------------------|------------|-----------------------------------------------------------------------|--------------|---------------------------------------------------------------------|
|                                                                                                                                                                                      | Yes or no? | Comment                                                                                  | Yes or no? | Comment                                                                             | Yes or no? | Comment                                         | Yes or no?  | Comment                                                                                                         | Yes or no? | Comment                                                               | Yes or no?   | Comment                                                             |
| ty. <i>Health policy and planning</i> . 2015;30(3): 368-385.                                                                                                                         |            |                                                                                          |            |                                                                                     |            |                                                 |             |                                                                                                                 |            |                                                                       |              |                                                                     |
| Sonnenreich P, Geisler L. Covering the Cost of the Cure: From Hepatitis C to Cancer, New Therapies Are Straining a System Plagued by Inefficiency. <i>P T</i> . 2016;41(9): 565-589. | Yes        | Authors have authority, relevant references included. Published in peer-reviewed journal | Yes        | Aim not clear, but brief clear and examples used to explain argument. Peer reviewed | Yes        | Focus on United States of America health system | Yes         | Author bias not explicitly stated, but standpoint is balanced with research from other researchers and articles | Yes        | Context of article identifiable. Key contemporary references included | Yes          | Examines the evolving notions of value in healthcare, cost vs cure, |
| Stoelwinder JU, Paolucci F. Sustaining Medicare                                                                                                                                      | Yes        | Authors have authority, relevant references                                              | Yes        | Brief clear and met, peer reviewed                                                  | Yes        | Focus on how Australia can learn from the       | Yes         | Author bias not explicitly stated, but standpoint                                                               | Yes        | Context of article identifiable as contempor                          | Yes          | Extracts the application to Australia                               |

| Reference                                                                                                                                                      | Authority  |                                                                                          | Accuracy   |                                         | Coverage   |                                      | Objectivity |                                                                                                                                                 | Date       |                                                                                                                                                   | Significance |                                                               |
|----------------------------------------------------------------------------------------------------------------------------------------------------------------|------------|------------------------------------------------------------------------------------------|------------|-----------------------------------------|------------|--------------------------------------|-------------|-------------------------------------------------------------------------------------------------------------------------------------------------|------------|---------------------------------------------------------------------------------------------------------------------------------------------------|--------------|---------------------------------------------------------------|
|                                                                                                                                                                | Yes or no? | Comment                                                                                  | Yes or no? | Comment                                 | Yes or no? | Comment                              | Yes or no?  | Comment                                                                                                                                         | Yes or no? | Comment                                                                                                                                           | Yes or no?   | Comment                                                       |
| through consumer choice of health funds: lessons from the Netherlands. <i>Medical Journal of Australia</i> . 2009;191(1):30-32.                                |            | included. Published in peer-reviewed journal                                             |            |                                         |            | Netherlands health system            |             | is balanced. Authors are affiliated with Australian institutions                                                                                |            | ary. Key contemporary references included                                                                                                         |              | of the Netherlands policies.                                  |
| Stoelwinder JU. Final report of the National Health and Hospitals Reform Commission: will we get the health care governance reform we need? <i>The Medical</i> | Yes        | Authors have authority, relevant references included. Published in peer-reviewed journal | Yes        | Brief clear and met, no method provided | Yes        | Specific to Australian health system | Yes         | Author bias not explicitly stated, but standpoint is balanced. Also of note, author declares conflict of interest as they are a board member of | Yes        | Context of article identifiable and there is explicit reference to the actions of the National Health and Hospitals Reform Commission and federal | Yes          | Timely article suggesting changes to Australian health system |

| Reference                                                                                                                                                | Authority  |                                                                                 | Accuracy   |                                                        | Coverage   |                                         | Objectivity |                                                                                                                                 | Date       |                                                                       | Significance |                                                                                       |
|----------------------------------------------------------------------------------------------------------------------------------------------------------|------------|---------------------------------------------------------------------------------|------------|--------------------------------------------------------|------------|-----------------------------------------|-------------|---------------------------------------------------------------------------------------------------------------------------------|------------|-----------------------------------------------------------------------|--------------|---------------------------------------------------------------------------------------|
|                                                                                                                                                          | Yes or no? | Comment                                                                         | Yes or no? | Comment                                                | Yes or no? | Comment                                 | Yes or no?  | Comment                                                                                                                         | Yes or no? | Comment                                                               | Yes or no?   | Comment                                                                               |
| <i>Journal of Australia</i> . 2009;191(7):387-388.                                                                                                       |            |                                                                                 |            |                                                        |            |                                         |             | Medibank Private                                                                                                                |            | government response. Key contemporary references included             |              |                                                                                       |
| Stuart N, Adams J. 2007. The sustainability of Canada's healthcare system: a framework for advancing the debate. <i>Healthcare Quarterly</i> 10: 96–103. | Partially  | Authors have authority, relevant references included. Journal not peer-reviewed | Yes        | Brief clear and met, no method provided, peer-reviewed | Yes        | Focus on Canadian healthcare            | Yes         | Author bias not explicitly stated, but standpoint is balanced and bias within the healthcare system is identified and discussed | Yes        | Context of article identifiable. Key contemporary references included | Yes          | Examines the importance of improving the sustainability of the Canadian health system |
| Taylor M. Australian health care reform: a place for                                                                                                     | Partially  | Author information not available, journal not                                   | Yes        | Clear brief to discuss role of NPs in Australia        | Yes        | Focus on the role of nurse practitioner | Yes         | Author bias not explicitly stated, but standpoint                                                                               | Yes        | Context of article identifiable as after the 2010                     | Yes          | Recognises and emphasises the emerging                                                |

| Reference                                                                                                                              | Authority  |                                                                                                           | Accuracy   |                                                                                                    | Coverage   |                                           | Objectivity |                                                                                                          | Date       |                                                                                  | Significance |                                                                                                     |
|----------------------------------------------------------------------------------------------------------------------------------------|------------|-----------------------------------------------------------------------------------------------------------|------------|----------------------------------------------------------------------------------------------------|------------|-------------------------------------------|-------------|----------------------------------------------------------------------------------------------------------|------------|----------------------------------------------------------------------------------|--------------|-----------------------------------------------------------------------------------------------------|
|                                                                                                                                        | Yes or no? | Comment                                                                                                   | Yes or no? | Comment                                                                                            | Yes or no? | Comment                                   | Yes or no?  | Comment                                                                                                  | Yes or no? | Comment                                                                          | Yes or no?   | Comment                                                                                             |
| nurse practitioners? Aust Nurs J. 2007;15(6):20-23.                                                                                    |            | peer-reviewed. However, relevant and peer-reviewed references are included                                |            | and how the role can be sustainable                                                                |            | rs in Australia                           |             | is justified by numerous government reports                                                              |            | Patient Protection and Affordable Care Act. Key contemporary references included |              | role of the nurse practitioner, and how it can be sustained                                         |
| Thompson RE. Sustainability as the lynch pin of public policy and industry initiatives. <i>Physician executive</i> . 1998;24(4):52-55. | Partially  | Authors are associated with reputable organisations in their field. However, journal is not peer-reviewed | Partially  | No clearly stated brief, starts with USA health political history and then to discuss managed care | Yes        | American population health                | Partially   | Authors standpoint is clear in their argument. However, it is not particularly balanced in presentation. | Partially  | Context of article identifiable. Majority of references are not contemporary     | Yes          | Promotes discussion regarding healthcare in the USA, and if and how managed care can be sustainable |
| Tsasis P. Chronic disease management and the home-care                                                                                 | Yes        | Authors have authority, relevant references included.                                                     | Yes        | Brief clear and met, no method provided                                                            | Yes        | Focus on health system in Ontario, Canada | Yes         | Author bias not explicitly stated, but standpoint                                                        | Yes        | Context of article identifiable. Key contemporary                                | Yes          | Important article, justified in terms of health of Canadians                                        |

| Reference                                                                                                                                                                                                | Authority  |                                                                                          | Accuracy   |                                                                                                         | Coverage   |                                                          | Objectivity |                                                                                           | Date       |                                                                                                                  | Significance |                                                                                                                             |
|----------------------------------------------------------------------------------------------------------------------------------------------------------------------------------------------------------|------------|------------------------------------------------------------------------------------------|------------|---------------------------------------------------------------------------------------------------------|------------|----------------------------------------------------------|-------------|-------------------------------------------------------------------------------------------|------------|------------------------------------------------------------------------------------------------------------------|--------------|-----------------------------------------------------------------------------------------------------------------------------|
|                                                                                                                                                                                                          | Yes or no? | Comment                                                                                  | Yes or no? | Comment                                                                                                 | Yes or no? | Comment                                                  | Yes or no?  | Comment                                                                                   | Yes or no? | Comment                                                                                                          | Yes or no?   | Comment                                                                                                                     |
| alternative in Ontario, Canada. Health Serv Manage Res. 2009;22(3):136-139.                                                                                                                              |            | Published in peer-reviewed journal                                                       |            |                                                                                                         |            |                                                          |             | is balanced                                                                               |            | references included                                                                                              |              | , and financial improvement                                                                                                 |
| Van de Pas R, Hill PS, Hammonds R, et al. Global health governance in the sustainable development goals: Is it grounded in the right to health? <i>Global challenges</i> (Hoboken, NJ). 2017;1(1):47-60. | Yes        | Authors have authority, relevant references included. Published in peer-reviewed journal | Yes        | Clear brief regarding analysis of the roots of the sustainable development goals in the right to health | Yes        | Worldwide, focusing on the sustainable development goals | Yes         | Author bias not explicitly stated, but standpoint is balanced and urban bias is discussed | Yes        | Context of article identifiable as post-2015 sustainable development goals. Key contemporary references included | Yes          | Unique argument, questions if the sustainable development goals satisfy the right to health, and concludes that they do not |

| Reference                                                                                                                                                              | Authority  |                                                                                          | Accuracy   |                                                                                                    | Coverage   |                                                                                          | Objectivity |                                                                                                                  | Date       |                                                                       | Significance |                                                                                        |
|------------------------------------------------------------------------------------------------------------------------------------------------------------------------|------------|------------------------------------------------------------------------------------------|------------|----------------------------------------------------------------------------------------------------|------------|------------------------------------------------------------------------------------------|-------------|------------------------------------------------------------------------------------------------------------------|------------|-----------------------------------------------------------------------|--------------|----------------------------------------------------------------------------------------|
|                                                                                                                                                                        | Yes or no? | Comment                                                                                  | Yes or no? | Comment                                                                                            | Yes or no? | Comment                                                                                  | Yes or no?  | Comment                                                                                                          | Yes or no? | Comment                                                               | Yes or no?   | Comment                                                                                |
| Veillard J, Denny K. Transformation through Clinical and Social Integration: Meeting the Needs of High Users of Healthcare. <i>Healthcare Papers</i> . 2014;14(2):4-7. | Yes        | Authors have authority, relevant references included. Published in peer-reviewed journal | Yes        | Clear brief in observations regarding the use of the health system by a minority of the population | Yes        | Focus on Canadian health system, especially Ontario, but message is applicable worldwide | Yes         | Author bias not explicitly stated, but standpoint is well balanced with arguments on many perspectives discussed | Yes        | Context of article identifiable. Key contemporary references included | Yes          | Argues five points regarding Ontario's health system and the potential for improvement |
| Wakerman J, Humphreys JS. Sustainable workforce and sustainable health systems for rural and remote                                                                    | Yes        | Authors have authority, relevant references included. Published in peer-reviewed journal | Yes        | Brief clear and met, no method provided                                                            | Yes        | Specific to rural and remote Australia                                                   | Yes         | Author bias not explicitly stated, but standpoint is balanced                                                    | Yes        | Context of article identifiable. Key contemporary references included | Yes          | Recognises interdependence of the health system of urban and rural areas               |

| Reference                                                                                                                                                                                   | Authority  |                                                                                          | Accuracy   |                                                              | Coverage   |                                                                                          | Objectivity |                                                                 | Date       |                                                                       | Significance |                                                                  |
|---------------------------------------------------------------------------------------------------------------------------------------------------------------------------------------------|------------|------------------------------------------------------------------------------------------|------------|--------------------------------------------------------------|------------|------------------------------------------------------------------------------------------|-------------|-----------------------------------------------------------------|------------|-----------------------------------------------------------------------|--------------|------------------------------------------------------------------|
|                                                                                                                                                                                             | Yes or no? | Comment                                                                                  | Yes or no? | Comment                                                      | Yes or no? | Comment                                                                                  | Yes or no?  | Comment                                                         | Yes or no? | Comment                                                               | Yes or no?   | Comment                                                          |
| Australia. <i>The Medical journal of Australia</i> . 2013;199(5 Suppl):S14-17.                                                                                                              |            |                                                                                          |            |                                                              |            |                                                                                          |             |                                                                 |            |                                                                       |              |                                                                  |
| Woodward, G. L., A. Iverson, R. Harvey, and P. G. Blake. 2015. Implementation of an agency to improve chronic kidney disease care in Ontario: lessons learned by the Ontario Renal Network. | Yes        | Authors have authority, relevant references included. Published in peer-reviewed journal | Yes        | The aim is adhered to, but there is no relevant methodology. | Yes        | Limits of article known (to identify lessons learnt from the CKD agency to improve care) | Yes         | Argument that the CKD system has been effective and sustainable | Yes        | Context of article identifiable. Key contemporary references included | Yes          | Identifies methods used for improving CKD care and their success |

| Reference                                                                                                                                                                         | Authority  |                                         | Accuracy   |                                          | Coverage   |                                         | Objectivity |                            | Date       |                            | Significance |         |
|-----------------------------------------------------------------------------------------------------------------------------------------------------------------------------------|------------|-----------------------------------------|------------|------------------------------------------|------------|-----------------------------------------|-------------|----------------------------|------------|----------------------------|--------------|---------|
|                                                                                                                                                                                   | Yes or no? | Comment                                 | Yes or no? | Comment                                  | Yes or no? | Comment                                 | Yes or no?  | Comment                    | Yes or no? | Comment                    | Yes or no?   | Comment |
| Healthc Q 17 Spec No:44-47.                                                                                                                                                       |            |                                         |            |                                          |            |                                         |             |                            |            |                            |              |         |
| Pisco L, Pinto LF. From Alma-Ata to Astana: the path of Primary Health Care in Portugal, 1978-2018 and the genesis of Family Medicine. <i>Ciencia &amp; saude coletiva</i> . 2020 | Yes        | All authors from reputable institutions |            | Peer reviewed, but no aim or methodology | Yes        | Portugal only                           | Yes         |                            | Yes        | Recent references included | Yes          |         |
| Ganann R, Peacock S, Garnett A, et al.                                                                                                                                            | Yes        | All authors from reputable              | Yes        | Clear aim and adhered to                 | Yes        | Context clearly stated and clear limits | Yes         | Bias not explicitly stated | Yes        | Recent references included | Yes          |         |



| Reference                                                                                                                                                                                       | Authority  |              | Accuracy   |         | Coverage   |         | Objectivity |         | Date       |         | Significance |         |
|-------------------------------------------------------------------------------------------------------------------------------------------------------------------------------------------------|------------|--------------|------------|---------|------------|---------|-------------|---------|------------|---------|--------------|---------|
|                                                                                                                                                                                                 | Yes or no? | Comment      | Yes or no? | Comment | Yes or no? | Comment | Yes or no?  | Comment | Yes or no? | Comment | Yes or no?   | Comment |
| Capacity development among academic trainees in community-based primary health care research: The Aging, Community and Health Research Unit Experience. Prim Health Care Res Dev. 2019;20:e139. |            | institutions |            |         |            |         |             |         |            |         |              |         |
| Jessup RL, O'Connor DA,                                                                                                                                                                         | Yes        |              | Yes        |         | Yes        |         | Yes         |         | Yes        |         | Yes          |         |

| Reference                                                                                                                                                                       | Authority  |                                         | Accuracy   |         | Coverage   |                          | Objectivity |         | Date       |                            | Significance |         |
|---------------------------------------------------------------------------------------------------------------------------------------------------------------------------------|------------|-----------------------------------------|------------|---------|------------|--------------------------|-------------|---------|------------|----------------------------|--------------|---------|
|                                                                                                                                                                                 | Yes or no? | Comment                                 | Yes or no? | Comment | Yes or no? | Comment                  | Yes or no?  | Comment | Yes or no? | Comment                    | Yes or no?   | Comment |
| Putrik P, et al. Alternative service models for delivery of healthcare services in high-income countries: a scoping review of systematic reviews. BMJ open. 2019;9(1): e024385. |            |                                         |            |         |            |                          |             |         |            |                            |              |         |
| Vainieri M, Noto G, Ferre F, Rosella LC. A Performance Managem                                                                                                                  | Yes        | All authors from reputable institutions | Yes        |         | Yes        | Explicitly mentions bias | Yes         |         | Yes        | Recent references included | Yes          |         |

| Reference                                                                                                                                        | Authority  |                                                                            | Accuracy   |                     | Coverage   |                                       | Objectivity |         | Date       |                            | Significance |                                                   |
|--------------------------------------------------------------------------------------------------------------------------------------------------|------------|----------------------------------------------------------------------------|------------|---------------------|------------|---------------------------------------|-------------|---------|------------|----------------------------|--------------|---------------------------------------------------|
|                                                                                                                                                  | Yes or no? | Comment                                                                    | Yes or no? | Comment             | Yes or no? | Comment                               | Yes or no?  | Comment | Yes or no? | Comment                    | Yes or no?   | Comment                                           |
| ent System in Healthcare for All Seasons? International Journal of Environmental Research & Public Health [Electronic Resource] . 2020;17(15):03 |            |                                                                            |            |                     |            |                                       |             |         |            |                            |              |                                                   |
| Braithwaite J, Mannion R, Matsuyama Y, et al. The future of health systems to 2030: a                                                            | Yes        | All authors from reputable institutions and published extensively in field | Yes        | Relevant references | Yes        | Includes information on 152 countries | Yes         |         | Yes        | Recent references included | Yes          | Adds meaningfully and enriches current literature |

| Reference                                                                                                                                                                               | Authority  |                            | Accuracy   |         | Coverage   |         | Objectivity |                                  | Date       |                            | Significance |         |
|-----------------------------------------------------------------------------------------------------------------------------------------------------------------------------------------|------------|----------------------------|------------|---------|------------|---------|-------------|----------------------------------|------------|----------------------------|--------------|---------|
|                                                                                                                                                                                         | Yes or no? | Comment                    | Yes or no? | Comment | Yes or no? | Comment | Yes or no?  | Comment                          | Yes or no? | Comment                    | Yes or no?   | Comment |
| roadmap for global progress and sustainability. International journal for quality in health care: journal of the International Society for Quality in Health Care. 2018;30(10):823-831. |            |                            |            |         |            |         |             |                                  |            |                            |              |         |
| Buttigieg SC. Innovation Strategies                                                                                                                                                     | Yes        | All authors from reputable | Yes        |         | Yes        |         | Yes         | Notes need to address contextual | Yes        | Recent references included | Yes          |         |

| Reference                                                                                                                                                                                                         | Authority  |              | Accuracy   |         | Coverage   |         | Objectivity |             | Date       |         | Significance |         |
|-------------------------------------------------------------------------------------------------------------------------------------------------------------------------------------------------------------------|------------|--------------|------------|---------|------------|---------|-------------|-------------|------------|---------|--------------|---------|
|                                                                                                                                                                                                                   | Yes or no? | Comment      | Yes or no? | Comment | Yes or no? | Comment | Yes or no?  | Comment     | Yes or no? | Comment | Yes or no?   | Comment |
| and Health System Guiding Principles to Address Equity and Sustainability in Responsible Innovation in Health Comment on "What Health System Challenges Should Responsible Innovation in Health Address? Insights |            | institutions |            |         |            |         |             | differences |            |         |              |         |

| Reference                                                                                                                                                                     | Authority  |                                                   | Accuracy   |                            | Coverage   |                                 | Objectivity |                     | Date       |                                           | Significance |                                                   |
|-------------------------------------------------------------------------------------------------------------------------------------------------------------------------------|------------|---------------------------------------------------|------------|----------------------------|------------|---------------------------------|-------------|---------------------|------------|-------------------------------------------|--------------|---------------------------------------------------|
|                                                                                                                                                                               | Yes or no? | Comment                                           | Yes or no? | Comment                    | Yes or no? | Comment                         | Yes or no?  | Comment             | Yes or no? | Comment                                   | Yes or no?   | Comment                                           |
| From an International Scoping Review". Int. 2019;8(9): 570-572                                                                                                                |            |                                                   |            |                            |            |                                 |             |                     |            |                                           |              |                                                   |
| Byskov J, Maluka S, Marchal B, et al. A systems perspective on the importance of global health strategy developments for accomplishing today's Sustainable Development Goals. | Yes        | All authors from reputable institutions worldwide | Yes        | Aim clearly stated and met | Yes        | Coverage based on aim being met | Yes         | Balanced standpoint | Yes        | Relevant contemporary references included | Yes          | Brings suggested ways forward to achieve the SDGs |

| Reference                                                                                                                                                                                      | Authority  |                                                            | Accuracy   |                                         | Coverage   |                                           | Objectivity |                                                                                            | Date       |                                  | Significance |                        |
|------------------------------------------------------------------------------------------------------------------------------------------------------------------------------------------------|------------|------------------------------------------------------------|------------|-----------------------------------------|------------|-------------------------------------------|-------------|--------------------------------------------------------------------------------------------|------------|----------------------------------|--------------|------------------------|
|                                                                                                                                                                                                | Yes or no? | Comment                                                    | Yes or no? | Comment                                 | Yes or no? | Comment                                   | Yes or no?  | Comment                                                                                    | Yes or no? | Comment                          | Yes or no?   | Comment                |
| Health policy and planning. 2019;34(9):635-645.                                                                                                                                                |            |                                                            |            |                                         |            |                                           |             |                                                                                            |            |                                  |              |                        |
| O'Brien N, Li R, Isaranuwatchai W, et al. How can we make better health decisions a Best Buy for all?: Commentary based on discussions at iDSI roundtable on 2 (nd) May 2019 London, UK. Gates | Yes        | All authors from reputable colleges, peer reviewed article | Yes        | Peer reviewed, authoritative references | Yes        | Covers health technology assessment (HTA) | Yes         | Bias not explicitly stated but balanced standpoint with WHO and country and local evidence | Yes        | Contemporary references included | Yes          | Adds to the literature |

| Reference                                                                                                                                                                                                     | Authority  |                                              | Accuracy   |                              | Coverage   |                                        | Objectivity |                                                                                            | Date       |                                  | Significance |                                                          |
|---------------------------------------------------------------------------------------------------------------------------------------------------------------------------------------------------------------|------------|----------------------------------------------|------------|------------------------------|------------|----------------------------------------|-------------|--------------------------------------------------------------------------------------------|------------|----------------------------------|--------------|----------------------------------------------------------|
|                                                                                                                                                                                                               | Yes or no? | Comment                                      | Yes or no? | Comment                      | Yes or no? | Comment                                | Yes or no?  | Comment                                                                                    | Yes or no? | Comment                          | Yes or no?   | Comment                                                  |
| open research. 2019;3:15-43.                                                                                                                                                                                  |            |                                              |            |                              |            |                                        |             |                                                                                            |            |                                  |              |                                                          |
| Hanney S, Kanya L, Pokhrel S, Jones T, Boaz A. WHO Health Evidence Network Synthesis Reports. What is the evidence on policies, interventions and tools for establishing and/or strengthening national health | Yes        | WHO authority, as well as individual authors | Yes        | Authoritative, clear aim met | Yes        | Scoping review parameters well defined | Yes         | Bias not explicitly stated but balanced standpoint with WHO and country and local evidence | Yes        | Contemporary references included | Yes          | Has considerations for policy analysis in many countries |



| Reference                                                                                                                       | Authority  |                                     | Accuracy   |                                                         | Coverage   |                                             | Objectivity |                                                                  | Date       |                                                    | Significance |                                      |
|---------------------------------------------------------------------------------------------------------------------------------|------------|-------------------------------------|------------|---------------------------------------------------------|------------|---------------------------------------------|-------------|------------------------------------------------------------------|------------|----------------------------------------------------|--------------|--------------------------------------|
|                                                                                                                                 | Yes or no? | Comment                             | Yes or no? | Comment                                                 | Yes or no? | Comment                                     | Yes or no?  | Comment                                                          | Yes or no? | Comment                                            | Yes or no?   | Comment                              |
| research systems and their effectiveness?<br>Copenhagen: WHO Regional Office for Europe © World Health Organization 2020.; 2020 |            |                                     |            |                                                         |            |                                             |             |                                                                  |            |                                                    |              |                                      |
| Braithwaite J, Vincent C, Nicklin W, Amalberti R. Coping with more people with more illness. Part 2: new generation             | Yes        | Well published authors in the field | Yes        | Authoritative references in the field, aim strategy met | Yes        | Global, but strategy for ISQua well defined | Yes         | Balanced standpoint, evidence from sources from around the world | Yes        | Context well defined, contemporary references used | Yes          | Important paper adding to literature |

| Reference                                                                                                                                           | Authority  |                                     | Accuracy   |                          | Coverage   |                                  | Objectivity |                                                | Date       |                                                            | Significance |                                         |
|-----------------------------------------------------------------------------------------------------------------------------------------------------|------------|-------------------------------------|------------|--------------------------|------------|----------------------------------|-------------|------------------------------------------------|------------|------------------------------------------------------------|--------------|-----------------------------------------|
|                                                                                                                                                     | Yes or no? | Comment                             | Yes or no? | Comment                  | Yes or no? | Comment                          | Yes or no?  | Comment                                        | Yes or no? | Comment                                                    | Yes or no?   | Comment                                 |
| of standards for enabling healthcare system transformation and sustainability. International Journal for Quality in Health Care. 2019;31(2):159-163 |            |                                     |            |                          |            |                                  |             |                                                |            |                                                            |              |                                         |
| Braithwaite J, Zurynski Y, Ludlow K, Holt J, Augustsson H, Campbell M.                                                                              | Yes        | Well published authors in the field | Yes        | Authoritative references | Yes        | Global but well defined protocol | Yes         | Balanced standpoint, bias explicitly addressed | Yes        | Date to be used well defined, contemporary references used | Yes          | Significant and important for the field |

| Reference                                                                                                                                                                               | Authority  |                       | Accuracy   |                          | Coverage   |                       | Objectivity |                     | Date       |                                  | Significance |                                 |
|-----------------------------------------------------------------------------------------------------------------------------------------------------------------------------------------|------------|-----------------------|------------|--------------------------|------------|-----------------------|-------------|---------------------|------------|----------------------------------|--------------|---------------------------------|
|                                                                                                                                                                                         | Yes or no? | Comment               | Yes or no? | Comment                  | Yes or no? | Comment               | Yes or no?  | Comment             | Yes or no? | Comment                          | Yes or no?   | Comment                         |
| Towards sustainable healthcare system performance in the 21st century in high-income countries: a protocol for a systematic review of the grey literature. BMJ open. 2019;9(1): e025892 |            |                       |            |                          |            |                       |             |                     |            |                                  |              |                                 |
| Martiniuk AL, Colbran R, Ramsden R, et al. Capability                                                                                                                                   | Yes        | Authoritative authors | Yes        | Authoritative references | Yes        | Coverage well defined | Yes         | Balanced standpoint | Yes        | Contemporary references included | Yes          | Important and adds to the field |

| Reference                                                                                                                                                                               | Authority  |                               | Accuracy   |               | Coverage   |                                                      | Objectivity |                                                              | Date       |         | Significance |         |
|-----------------------------------------------------------------------------------------------------------------------------------------------------------------------------------------|------------|-------------------------------|------------|---------------|------------|------------------------------------------------------|-------------|--------------------------------------------------------------|------------|---------|--------------|---------|
|                                                                                                                                                                                         | Yes or no? | Comment                       | Yes or no? | Comment       | Yes or no? | Comment                                              | Yes or no?  | Comment                                                      | Yes or no? | Comment | Yes or no?   | Comment |
| ... what's in a word? Rural Doctors Network of New South Wales Australia is shifting to focus on the capability of rural health professionals. Rural and remote health. 2020;20(3):5633 |            |                               |            |               |            |                                                      |             |                                                              |            |         |              |         |
| Rudnicka E, Napierała P, Podfigurna A, Męczekal                                                                                                                                         | Yes        | Peer reviewed journal article | Yes        | Peer-reviewed | Yes        | Aimed to coverage global perspective and achieved it | Yes         | Authors standpoint is clear, relatively balance presentation | Yes        |         | Yes          |         |

| Reference                                                                                                                           | Authority  |                                                                  | Accuracy   |               | Coverage   |                              | Objectivity |                                             | Date       |                                                                         | Significance |         |
|-------------------------------------------------------------------------------------------------------------------------------------|------------|------------------------------------------------------------------|------------|---------------|------------|------------------------------|-------------|---------------------------------------------|------------|-------------------------------------------------------------------------|--------------|---------|
|                                                                                                                                     | Yes or no? | Comment                                                          | Yes or no? | Comment       | Yes or no? | Comment                      | Yes or no?  | Comment                                     | Yes or no? | Comment                                                                 | Yes or no?   | Comment |
| ski B, Smolarczyk R, Grymowicz M. The World Health Organization (WHO) approach to healthy ageing. <i>Maturitas</i> . 2020;139:6-11. |            |                                                                  |            |               |            |                              |             |                                             |            |                                                                         |              |         |
| Walsh K. Strengthening primary care: the role of e-learning. <i>Educ</i> . 2019;30(5):267-269.                                      | Yes        | Author has a strong publication record in peer reviewed journals | Yes        | Peer reviewed | Yes        |                              | Yes         | No bias stated but is a balanced commentary | Yes        | Contemporary references included, date is discernible by subject matter | Yes          |         |
| De Santis M. Integrated                                                                                                             | Yes        | Authors both appear to                                           | Yes        | Peer reviewed | Yes        | Looking at studies published | Yes         | No bias stated,                             | Yes        | Recent references included,                                             | Yes          |         |

| Reference                                                                                                                                       | Authority  |                                                                                               | Accuracy   |                                                           | Coverage   |                                                                             | Objectivity |                                     | Date       |                                                    | Significance |         |
|-------------------------------------------------------------------------------------------------------------------------------------------------|------------|-----------------------------------------------------------------------------------------------|------------|-----------------------------------------------------------|------------|-----------------------------------------------------------------------------|-------------|-------------------------------------|------------|----------------------------------------------------|--------------|---------|
|                                                                                                                                                 | Yes or no? | Comment                                                                                       | Yes or no? | Comment                                                   | Yes or no? | Comment                                                                     | Yes or no?  | Comment                             | Yes or no? | Comment                                            | Yes or no?   | Comment |
| care for healthcare sustainability for patients living with rare diseases. <i>Annali dell'Istituto superiore di sanita.</i> 2019;55(3):276-282. |            | have roles in prominent rare disease organisations in Europe                                  |            |                                                           |            | between 2000 and 2018. Search terms provided, both grey lit and PR included |             | standpoint is clear                 |            | date is discernible                                |              |         |
| Ferrelli RM, Fantini B, Taruscio D. Health systems sustainability for rare diseases. Preface. <i>Annali dell'Istituto</i>                       | Yes        | Authors either work for rare diseases network in Europe or in the ministry of health in Italy | Yes        | Book chapter-editors are all from reputable organisations | Yes        | Europe specific with focus on rare diseases                                 | Yes         | No bias stated, standpoint is clear | Yes        | Contemporary references, the context is very clear | Yes          |         |

| Reference                                                                                                                                                                                             | Authority  |                                                | Accuracy   |                               | Coverage   |                                                                                                 | Objectivity |                                                                        | Date       |                                                                           | Significance |         |
|-------------------------------------------------------------------------------------------------------------------------------------------------------------------------------------------------------|------------|------------------------------------------------|------------|-------------------------------|------------|-------------------------------------------------------------------------------------------------|-------------|------------------------------------------------------------------------|------------|---------------------------------------------------------------------------|--------------|---------|
|                                                                                                                                                                                                       | Yes or no? | Comment                                        | Yes or no? | Comment                       | Yes or no? | Comment                                                                                         | Yes or no?  | Comment                                                                | Yes or no? | Comment                                                                   | Yes or no?   | Comment |
| superiore di sanita. 2019;55(3):249-250.                                                                                                                                                              |            |                                                |            |                               |            |                                                                                                 |             |                                                                        |            |                                                                           |              |         |
| Steenhuis S, Struijs J, Koolman X, Ket J, E VDH. Unraveling the Complexity in the Design and Implementation of Bundled Payments: A Scoping Review of Key Elements From a Payer's Perspective. Milbank | Yes        | Authors have peer reviewed publication history | Yes        | Aim stated, clear methodology | Yes        | Limits stated in the methodology- review related to payment methods, relevant to OECD countries | Yes         | Authors address risk of bias, there is a balanced standpoint presented | Yes        | Contemporary references included, date is discernible throughout the text | Yes          |         |

| Reference                                                                                                                                                                                             | Authority  |                                                       | Accuracy   |                            | Coverage   |                          | Objectivity |                                                                                  | Date       |                                                | Significance |                                                               |
|-------------------------------------------------------------------------------------------------------------------------------------------------------------------------------------------------------|------------|-------------------------------------------------------|------------|----------------------------|------------|--------------------------|-------------|----------------------------------------------------------------------------------|------------|------------------------------------------------|--------------|---------------------------------------------------------------|
|                                                                                                                                                                                                       | Yes or no? | Comment                                               | Yes or no? | Comment                    | Yes or no? | Comment                  | Yes or no?  | Comment                                                                          | Yes or no? | Comment                                        | Yes or no?   | Comment                                                       |
| Quarterly. 2020;98(1):197-222.                                                                                                                                                                        |            |                                                       |            |                            |            |                          |             |                                                                                  |            |                                                |              |                                                               |
| Nikolić B. Applicability of European Union Competition Law to Health Care Providers: The Dividing Line between Economic and Noneconomic Activities. Journal of health politics, policy and law. 2020. | Yes        | Contemporary references, author from reputable source | Yes        | Aim clearly stated and met | Yes        | Clear coverage within EU | Yes         | Authors opinion is balanced by contemporary references and different standpoints | Yes        | Context clear, contemporary references present | Yes          | Important article that helps make the legal uncertainty clear |
| Niraula S. Strategizi                                                                                                                                                                                 | Yes        | Authoritative author,                                 | Yes        | Clearly stated             | Yes        | Coverage specific to     | Yes         | balanced standpoint                                                              | Yes        | Universal healthcare                           | Yes          | Adds context,                                                 |



| Reference                                                                                                                                                                                      | Authority  |                              | Accuracy   |                                      | Coverage   |                                                  | Objectivity |                                   | Date       |                                                                                | Significance |                                                  |
|------------------------------------------------------------------------------------------------------------------------------------------------------------------------------------------------|------------|------------------------------|------------|--------------------------------------|------------|--------------------------------------------------|-------------|-----------------------------------|------------|--------------------------------------------------------------------------------|--------------|--------------------------------------------------|
|                                                                                                                                                                                                | Yes or no? | Comment                      | Yes or no? | Comment                              | Yes or no? | Comment                                          | Yes or no?  | Comment                           | Yes or no? | Comment                                                                        | Yes or no?   | Comment                                          |
| ng health technology assessment for containment of cancer drug costs in a universal health care system: Case of the pan-Canadian Oncology Drug Review. <i>Cancer</i> . 2019;125(18):3100-3103. |            | detailed reference list      |            | brief, peer reviewed article         |            | Canadian oncology drug review                    |             |                                   |            | system in Canada since 1968, and has been deduced with contemporary references |              | important yet specific article                   |
| Wurcel V, Cicchetti A, Garrison L, et al.                                                                                                                                                      | Yes        | Authors experts in the field | Yes        | Peer-reviewed article, clear aim and | Yes        | Coverage specific to the VODI published articles | Yes         | Balanced standpoint with examples | Yes        | Contemporary references included,                                              | Yes          | Important addition regarding value of diagnostic |

| Reference                                                                                                                                                                                           | Authority  |         | Accuracy   |             | Coverage   |         | Objectivity |                | Date       |         | Significance |                    |
|-----------------------------------------------------------------------------------------------------------------------------------------------------------------------------------------------------|------------|---------|------------|-------------|------------|---------|-------------|----------------|------------|---------|--------------|--------------------|
|                                                                                                                                                                                                     | Yes or no? | Comment | Yes or no? | Comment     | Yes or no? | Comment | Yes or no?  | Comment        | Yes or no? | Comment | Yes or no?   | Comment            |
| The Value of Diagnostic Information in Personalised Healthcare: A Comprehensive Concept to Facilitate Bringing This Technology into Healthcare Systems. Public Health Genomics . 2019;22(1-2):8-15. |            |         |            | methodology |            |         |             | and references |            |         |              | information (VODI) |

| Reference                                                                                                                                                                                | Authority  |                                                         | Accuracy   |                                                                                | Coverage   |                                                                   | Objectivity |                                                                  | Date       |                                                          | Significance |                                                          |
|------------------------------------------------------------------------------------------------------------------------------------------------------------------------------------------|------------|---------------------------------------------------------|------------|--------------------------------------------------------------------------------|------------|-------------------------------------------------------------------|-------------|------------------------------------------------------------------|------------|----------------------------------------------------------|--------------|----------------------------------------------------------|
|                                                                                                                                                                                          | Yes or no? | Comment                                                 | Yes or no? | Comment                                                                        | Yes or no? | Comment                                                           | Yes or no?  | Comment                                                          | Yes or no? | Comment                                                  | Yes or no?   | Comment                                                  |
| Cunningham FC, Ranmuthugala G, Westbrook JI, Braithwaite J. Tackling the wicked problem of health networks: the design of an evaluation framework. <i>BMJ open</i> . 2019;9(5): e024231. | Yes        | Authors authoritative in field, detailed reference list | Yes        | Clearly stated aim and methods adhered to. Work is representative of the field | Yes        | Evaluations of systematic reviews to date                         | Yes         | Balanced standpoint                                              | Yes        | Date discernible, contemporary references present        | Yes          | Meaningful contribution to literature                    |
| Embi PJ, Richesson R, Tenenbaum J, et al. Reimagining the                                                                                                                                | Yes        | Authoritative authors from well-respected institutions  | Yes        | Clear aim highlighted and met                                                  | Yes        | Specific to covering what was discussed and the findings from the | Yes         | Balanced standpoint with contributions from over 70 participants | Yes        | Discernible from references as well as timing of meeting | Yes          | Synthesised findings from meeting and adds to literature |

| Reference                                                                                                                                                  | Authority  |                       | Accuracy   |                       | Coverage   |                                                   | Objectivity |                                                                                        | Date       |                                                   | Significance |                                                        |
|------------------------------------------------------------------------------------------------------------------------------------------------------------|------------|-----------------------|------------|-----------------------|------------|---------------------------------------------------|-------------|----------------------------------------------------------------------------------------|------------|---------------------------------------------------|--------------|--------------------------------------------------------|
|                                                                                                                                                            | Yes or no? | Comment               | Yes or no? | Comment               | Yes or no? | Comment                                           | Yes or no?  | Comment                                                                                | Yes or no? | Comment                                           | Yes or no?   | Comment                                                |
| research-practice relationship: policy recommendations for informatics-enabled evidence-generation across the US health system. JAMIA open. 2019;2(1):2-9. |            |                       |            |                       |            | 2016 AMIA meeting                                 |             | s at meeting                                                                           |            | reported on                                       |              |                                                        |
| Park YL, Canaway R. Integrating Traditional and Complementary Medicine with                                                                                | Yes        | Authoritative authors | Yes        | Peer reviewed journal | Yes        | limits clearly stated with Western Pacific region | Yes         | Bias not explicitly stated, but expert balanced standpoint drawing on experiences from | Yes        | Date discernible, contemporary references present | Yes          | Interesting and unique article, adds to the literature |

| Reference                                                                                                                 | Authority  |                                                                 | Accuracy   |                                                                                                                       | Coverage   |                     | Objectivity |                                                                                    | Date       |                                                                                         | Significance |                                                         |
|---------------------------------------------------------------------------------------------------------------------------|------------|-----------------------------------------------------------------|------------|-----------------------------------------------------------------------------------------------------------------------|------------|---------------------|-------------|------------------------------------------------------------------------------------|------------|-----------------------------------------------------------------------------------------|--------------|---------------------------------------------------------|
|                                                                                                                           | Yes or no? | Comment                                                         | Yes or no? | Comment                                                                                                               | Yes or no? | Comment             | Yes or no?  | Comment                                                                            | Yes or no? | Comment                                                                                 | Yes or no?   | Comment                                                 |
| National Healthcare Systems for Universal Health Coverage in Asia and the Western Pacific. Health syst. 2019;5(1): 24-31. |            |                                                                 |            |                                                                                                                       |            |                     |             | many countries                                                                     |            |                                                                                         |              |                                                         |
| Quaglio G, Figueras J, Mantoan D, et al. An overview of future EU health systems. An insight into governanc               | Yes        | Authors have all previously published extensively in this field | Yes        | Published in peer reviewed journal. Aim isn't explicitly presented, but article is referencing/ reporting on workshop | Yes        | EU specific context | Yes         | Author bias isn't stated, but discussion presents clear standpoint and is balanced | Yes        | References workshop in 2017 that inspired the publication, references recent literature | Yes          | Contributes meaningfully to discussion of HSS in the EU |

| Reference                                                                                                                            | Authority  |                                                       | Accuracy   |                                                                                                                            | Coverage   |                                                                               | Objectivity |                                                                             | Date       |                                              | Significance |                                                                                              |
|--------------------------------------------------------------------------------------------------------------------------------------|------------|-------------------------------------------------------|------------|----------------------------------------------------------------------------------------------------------------------------|------------|-------------------------------------------------------------------------------|-------------|-----------------------------------------------------------------------------|------------|----------------------------------------------|--------------|----------------------------------------------------------------------------------------------|
|                                                                                                                                      | Yes or no? | Comment                                               | Yes or no? | Comment                                                                                                                    | Yes or no? | Comment                                                                       | Yes or no?  | Comment                                                                     | Yes or no? | Comment                                      | Yes or no?   | Comment                                                                                      |
| e, primary care, data collection and citizens' participation. Journal of public health (Oxford, England)                             |            |                                                       |            | held in parliament                                                                                                         |            |                                                                               |             |                                                                             |            |                                              |              |                                                                                              |
| Lehoux P, Roncarolo F, Silva HP, Boivin A, Denis JL, Hebert R. What Health System Challenges Should Responsible Innovation in Health | Yes        | Authors have strong publication record in PR journals | Yes        | Aim stated, methods clearly stated, published in PR journal<br>aim stated, methods clearly stated, published in PR journal | Yes        | International scoping review with well defined parameters and search strategy | Yes         | Bias isn't stated but limitations of review are, and standpoint is balanced | Yes        | Articles included for review span 2000-2016. | Yes          | Very detailed scoping review, identifies a number of challenges facing global health systems |

| Reference                                                                           | Authority  |                                                                           | Accuracy   |                                                                                        | Coverage   |                                                                | Objectivity |                                                 | Date       |                                                                       | Significance |                                                                             |
|-------------------------------------------------------------------------------------|------------|---------------------------------------------------------------------------|------------|----------------------------------------------------------------------------------------|------------|----------------------------------------------------------------|-------------|-------------------------------------------------|------------|-----------------------------------------------------------------------|--------------|-----------------------------------------------------------------------------|
|                                                                                     | Yes or no? | Comment                                                                   | Yes or no? | Comment                                                                                | Yes or no? | Comment                                                        | Yes or no?  | Comment                                         | Yes or no? | Comment                                                               | Yes or no?   | Comment                                                                     |
| Address? Insights From an International Scoping Review. Int. 2019;8(2): 63-75.      |            |                                                                           |            |                                                                                        |            |                                                                |             |                                                 |            |                                                                       |              |                                                                             |
| Editorial. Healthcare quarterly (Toronto, Ont.). 2020;22(4)                         |            | Authors not stated- editors of Healthcare Quarterly- a                    |            | Commentary- no aim or methods                                                          | Yes        | Canada specific                                                | Yes         | Standpoint clear                                | Yes        | Context is article is identifiable because of contemporary references |              |                                                                             |
| Abimbola S, Baatiema L, Bigdeli M. The impacts of decentralization on health system | Yes        | Authors from reputable institutions with good publication records in peer | Yes        | Clear methodology/ search strategy. In peer reviewed journal. No aim explicitly stated | Yes        | Wide coverage- looking at low/middle and high income countries | Yes         | Author bias not stated, but balanced standpoint | Yes        | Context of article identified                                         | Yes          | Identified three mechanisms by which decentralization may influence equity, |

| Reference                                                                                                                        | Authority  |                                      | Accuracy   |                                                                   | Coverage   |                   | Objectivity |                                               | Date       |                                                                                            | Significance |                                                                         |
|----------------------------------------------------------------------------------------------------------------------------------|------------|--------------------------------------|------------|-------------------------------------------------------------------|------------|-------------------|-------------|-----------------------------------------------|------------|--------------------------------------------------------------------------------------------|--------------|-------------------------------------------------------------------------|
|                                                                                                                                  | Yes or no? | Comment                              | Yes or no? | Comment                                                           | Yes or no? | Comment           | Yes or no?  | Comment                                       | Yes or no? | Comment                                                                                    | Yes or no?   | Comment                                                                 |
| equity, efficiency and resilience: a realist synthesis of the evidence. Health Policy & Planning. 2019;34(8):605-617             |            | reviewed journals                    |            |                                                                   |            |                   |             |                                               |            |                                                                                            |              | efficiency, and resilience in 25 countries (low middle and high income) |
| Craig N, Robinson M. Towards a preventative approach to improving health and reducing health inequalities: a view from Scotland. | Yes        | Both authors affiliated with the NHS | Yes        | no aims or method stated but is peer reviewed and well referenced | Yes        | Scotland specific | Yes         | Author bias not stated but viewpoint is clear | Yes        | Context easy to discern based on references and analysis of trends in previous 10-15 years | Yes          | Useful in Scottish context                                              |



| Reference                                                                                                                               | Authority  |                                                                                                                                 | Accuracy   |                                        | Coverage   |                                                       | Objectivity |                                  | Date       |                             | Significance |         |
|-----------------------------------------------------------------------------------------------------------------------------------------|------------|---------------------------------------------------------------------------------------------------------------------------------|------------|----------------------------------------|------------|-------------------------------------------------------|-------------|----------------------------------|------------|-----------------------------|--------------|---------|
|                                                                                                                                         | Yes or no? | Comment                                                                                                                         | Yes or no? | Comment                                | Yes or no? | Comment                                               | Yes or no?  | Comment                          | Yes or no? | Comment                     | Yes or no?   | Comment |
| Public health. 2019;169: 195-200.                                                                                                       |            |                                                                                                                                 |            |                                        |            |                                                       |             |                                  |            |                             |              |         |
| Costa-Font J, Levaggi R. Innovation, aging, and health care: Unraveling "silver" from "red" herrings? Health Econ. 2020;29 Suppl 1:3-7. | Yes        | Both authors have strong publication history and are associated with reputable institutions. Published in peer reviewed journal | Yes        | Peer reviewed, no aim or method stated | Yes        | special issue presents papers presented at a workshop | Yes         | There isn't a bias stated        | Yes        | discernible from references | Yes          |         |
| Derakhshani N, Doshman gir L, Ahmadi A, Fakhri A,                                                                                       | Yes        | Authors have strong publication history                                                                                         | Yes        | Detailed methods and search strategy   | Yes        | Parameters defined in search strategy                 | Yes         | Bias not stated, viewpoint clear | Yes        | Context is discernible      | Yes          |         |

| Reference                                                                                                                                                                                                                     | Authority  |         | Accuracy   |         | Coverage   |         | Objectivity |         | Date       |         | Significance |         |
|-------------------------------------------------------------------------------------------------------------------------------------------------------------------------------------------------------------------------------|------------|---------|------------|---------|------------|---------|-------------|---------|------------|---------|--------------|---------|
|                                                                                                                                                                                                                               | Yes or no? | Comment | Yes or no? | Comment | Yes or no? | Comment | Yes or no?  | Comment | Yes or no? | Comment | Yes or no?   | Comment |
| Sadeghi-Bazargani H, Gordeev VS. Monitoring Process Barriers and Enablers Towards Universal Health Coverage Within the Sustainable Development Goals: A Systematic Review and Content Analysis. ClinicoEconomics and outcomes |            |         |            |         |            |         |             |         |            |         |              |         |

| Reference                                                                                                                                                                                                                                                           | Authority  |                                                                  | Accuracy   |                                | Coverage   |                     | Objectivity |         | Date       |                                                 | Significance |         |
|---------------------------------------------------------------------------------------------------------------------------------------------------------------------------------------------------------------------------------------------------------------------|------------|------------------------------------------------------------------|------------|--------------------------------|------------|---------------------|-------------|---------|------------|-------------------------------------------------|--------------|---------|
|                                                                                                                                                                                                                                                                     | Yes or no? | Comment                                                          | Yes or no? | Comment                        | Yes or no? | Comment             | Yes or no?  | Comment | Yes or no? | Comment                                         | Yes or no?   | Comment |
| research :<br>CEOR.<br>2020;12:4<br>59-472                                                                                                                                                                                                                          |            |                                                                  |            |                                |            |                     |             |         |            |                                                 |              |         |
| Clancy C.<br>Creating<br>World-<br>Class<br>Care and<br>Service<br>for Our<br>Nation's<br>Finest:<br>How<br>Veterans<br>Health<br>Administ<br>ration<br>Diffusion<br>of<br>Excellenc<br>e<br>Initiative<br>Is<br>Innovatin<br>g and<br>Transform<br>ing<br>Veterans |            | Author<br>affiliated<br>with VA,<br>no<br>publicatio<br>n record | Yes        | In peer<br>reviewed<br>journal | Yes        | Restricted<br>to VA |             |         | Yes        | Date and<br>context<br>discernible<br>from text |              |         |

| Reference                                                                                                                                  | Authority  |                                        | Accuracy   |                                                | Coverage   |                                                                                            | Objectivity |                                                        | Date       |                                     | Significance |                               |
|--------------------------------------------------------------------------------------------------------------------------------------------|------------|----------------------------------------|------------|------------------------------------------------|------------|--------------------------------------------------------------------------------------------|-------------|--------------------------------------------------------|------------|-------------------------------------|--------------|-------------------------------|
|                                                                                                                                            | Yes or no? | Comment                                | Yes or no? | Comment                                        | Yes or no? | Comment                                                                                    | Yes or no?  | Comment                                                | Yes or no? | Comment                             | Yes or no?   | Comment                       |
| Affairs Health Care. Perm. 2019;23                                                                                                         |            |                                        |            |                                                |            |                                                                                            |             |                                                        |            |                                     |              |                               |
| Marcotte LM, Moriates C, Wolfson DB, Frankel RM. Professionalism as the Bedrock of High-Value Care. Academic Medicine. 2020;95(6):864-867. | Yes        | Authors have strong publication record | Yes        | Peer reviewed                                  | Yes        | No limits stated, but is restricted to looking at healthcare professionals (in US context) | Yes         | Bias not explicitly stated, but standpoint is balanced | Yes        | Date/context discernible from text  | Yes          |                               |
| Witter S, Palmer N, Balabano va D, et al. Health                                                                                           | Yes        | Authors have strong publication record | Yes        | Peer reviewed, but there is no aims or methods | Yes        | Looked at studies published between 2000 and 2018                                          | Yes         | Acknowledgement of biases and limitations; well        | Yes        | Context discernible from references | Yes          | Contributes to the literature |

| Reference                                                                                                                                                               | Authority  |                                             | Accuracy   |                                                | Coverage   |                                   | Objectivity |                     | Date       |                     | Significance |                                                             |
|-------------------------------------------------------------------------------------------------------------------------------------------------------------------------|------------|---------------------------------------------|------------|------------------------------------------------|------------|-----------------------------------|-------------|---------------------|------------|---------------------|--------------|-------------------------------------------------------------|
|                                                                                                                                                                         | Yes or no? | Comment                                     | Yes or no? | Comment                                        | Yes or no? | Comment                           | Yes or no?  | Comment             | Yes or no? | Comment             | Yes or no?   | Comment                                                     |
| system strengthening- Reflections on its meaning, assessment, and our state of knowledge. International Journal of Health Planning & Management. 2019;34(4):e1980-e1989 |            |                                             |            |                                                |            | focussed on interventions in LMIC |             | balanced standpoint |            |                     |              |                                                             |
| Sturmberg JP. Resilience for health-an emergent property                                                                                                                | Yes        | Author has publication record in this field | Yes        | Peer reviewed, but there is no aims or methods |            | Limits not stated                 |             | No bias stated      |            | No discernible date | Yes          | Contributes to conversation around health system resilience |

| Reference                                                                                                                                      | Authority  |                                     | Accuracy   |               | Coverage   |                                                     | Objectivity |                                                        | Date       |                                                                                        | Significance |         |
|------------------------------------------------------------------------------------------------------------------------------------------------|------------|-------------------------------------|------------|---------------|------------|-----------------------------------------------------|-------------|--------------------------------------------------------|------------|----------------------------------------------------------------------------------------|--------------|---------|
|                                                                                                                                                | Yes or no? | Comment                             | Yes or no? | Comment       | Yes or no? | Comment                                             | Yes or no?  | Comment                                                | Yes or no? | Comment                                                                                | Yes or no?   | Comment |
| of the "health systems as a whole". Journal of evaluation in clinical practice. 2018;24(6):1323-1329.                                          |            |                                     |            |               |            |                                                     |             |                                                        |            |                                                                                        |              |         |
| Thistlethwaite JE, Dunston R, Yassine T. The times are changing: workforce planning, new health-care models and the need for interprofessional | Yes        | Authors from reputable institutions | Yes        | Peer reviewed | Yes        | Specific to Australia/ the Australian health system | Yes         | Bias not explicitly stated, but standpoint is balanced | Yes        | References contemporary reports about Australian health system. Context is discernible | Yes          |         |

| Reference                                                                                                                                                   | Authority  |                                        | Accuracy   |                                                                                      | Coverage   |                                           | Objectivity |                     | Date       |                                                                                      | Significance |                               |
|-------------------------------------------------------------------------------------------------------------------------------------------------------------|------------|----------------------------------------|------------|--------------------------------------------------------------------------------------|------------|-------------------------------------------|-------------|---------------------|------------|--------------------------------------------------------------------------------------|--------------|-------------------------------|
|                                                                                                                                                             | Yes or no? | Comment                                | Yes or no? | Comment                                                                              | Yes or no? | Comment                                   | Yes or no?  | Comment             | Yes or no? | Comment                                                                              | Yes or no?   | Comment                       |
| education in Australia. Journal of interprofessional care. 2019;33(4):361-368.                                                                              |            |                                        |            |                                                                                      |            |                                           |             |                     |            |                                                                                      |              |                               |
| Iskrov G, Stefanov R, Ferrelli RM. Health systems for rare diseases: financial sustainability. Annali dell'Istituto superiore di sanita. 2019;55(3):270-275 | Yes        | Authors have strong publication record | Yes        | No clear aim stated, but there is clear methodology and paper has been peer reviewed | Yes        | Covers health systems in EU member states | Yes         | Balanced standpoint | Yes        | References contemporary reports about health systems in the EU-context is very clear | Yes          | Contributes to the literature |
